# Supplementary material for: Automatic Spraying Modulated Rumen Fermentation and Microbiota and Alleviated Adverse Effects of Heat Stress on Cows
Source: Preprints.org preprint supplement (doi:10.20944/preprints202406.1215.v1), 2024-06-18
Supplement: Supplementary file 2 [file supplementary]

## Sheet: Sheet1
OTU ID	CON1	CON2	CON3	CON4	CON5	CON6	CON7	CON8	CON9	SP1	SP2	SP3	SP4	SP5	SP6	SP7	SP8	SP9	taxonomy
OTU_1	1675	2205	737	2139	951	1965	5750	4035	1150	3438	1242	3717	1852	1486	1773	1373	10	10	k__Bacteria; p__Firmicutes; c__Negativicutes; o__Selenomonadales; f__Acidaminococcaceae; g__Succiniclasticum; s__uncultured bacterium
OTU_20	982	1028	0	27	0	0	1	0	323	3	0	342	95	4	0	0	0	0	k__Bacteria; p__Firmicutes; c__Clostridia; o__Clostridiales; f__Ruminococcaceae; g__[Eubacterium] coprostanoligenes group; s__uncultured bacterium
OTU_98	190	143	169	162	228	107	144	85	151	97	81	89	93	96	103	81	89	119	k__Bacteria; p__Bacteroidetes; c__Bacteroidia; o__Bacteroidales; f__Prevotellaceae; g__Prevotella 1; s__uncultured rumen bacterium
OTU_137	74	55	7	10	0	4	0	15	14	36	9	31	35	3	7	6	2	1	k__Bacteria; p__Firmicutes; c__Erysipelotrichia; o__Erysipelotrichales; f__Erysipelotrichaceae; g__Solobacterium
OTU_1099	1	1	10	2	24	8	3	4	1	1	7	0	1	2	1	6	6	4	k__Bacteria; p__Bacteroidetes; c__Bacteroidia; o__Bacteroidales; f__Prevotellaceae; g__Prevotella 1
OTU_144	219	186	3	103	2	23	85	154	0	94	24	122	68	33	43	35	17	6	k__Bacteria; p__Firmicutes; c__Clostridia; o__Clostridiales; f__Ruminococcaceae; g__Ruminococcaceae UCG-014
OTU_2	2072	2230	557	785	500	499	806	1543	1858	1210	1162	848	1150	779	537	999	782	581	k__Bacteria; p__Firmicutes; c__Clostridia; o__Clostridiales; f__Lachnospiraceae; g__Syntrophococcus; s__uncultured bacterium
OTU_508	11	6	11	28	1	28	18	11	2	9	7	20	20	3	4	4	0	1	k__Bacteria; p__Firmicutes; c__Clostridia; o__Clostridiales; f__Ruminococcaceae; g__Ruminococcus 1
OTU_23	423	312	29	261	16	35	33	51	106	55	122	190	204	18	51	67	30	18	k__Bacteria; p__Firmicutes; c__Clostridia; o__Clostridiales; f__Lachnospiraceae; g__Lachnospiraceae NK3A20 group; s__uncultured bacterium
OTU_51	361	380	196	474	190	480	436	356	175	560	279	338	168	302	137	66	140	33	k__Bacteria; p__Firmicutes; c__Clostridia; o__Clostridiales; f__Lachnospiraceae; g__[Eubacterium] ruminantium group; s__uncultured rumen bacterium
OTU_1222	4	1	4	10	0	2	0	1	6	6	6	2	0	0	2	4	2	3	k__Bacteria; p__Tenericutes; c__Mollicutes; o__Mollicutes RF39; f__uncultured rumen bacterium; g__uncultured rumen bacterium; s__uncultured rumen bacterium
OTU_326	36	24	16	33	32	27	2	14	67	7	20	43	24	14	11	26	20	26	k__Bacteria; p__Firmicutes; c__Clostridia; o__Clostridiales; f__Lachnospiraceae; g__Howardella; s__uncultured rumen bacterium
OTU_9	593	604	143	741	191	216	284	194	757	270	354	577	738	47	238	311	297	560	k__Bacteria; p__Firmicutes; c__Clostridia; o__Clostridiales; f__Lachnospiraceae; g__Lachnospiraceae NK3A20 group; s__uncultured bacterium
OTU_11	1709	752	229	293	113	66	280	398	54	980	128	326	119	455	229	178	134	37	k__Bacteria; p__Firmicutes; c__Clostridia; o__Clostridiales; f__Lachnospiraceae; g__Shuttleworthia
OTU_12	1069	658	143	341	99	236	777	1006	156	1217	217	813	224	98	448	185	245	98	k__Bacteria; p__Firmicutes; c__Clostridia; o__Clostridiales; f__Lachnospiraceae; g__Shuttleworthia
OTU_97	50	39	36	98	64	39	15	18	80	50	32	16	32	19	32	33	41	48	k__Bacteria; p__Firmicutes; c__Clostridia; o__Clostridiales; f__Lachnospiraceae; g__Butyrivibrio 2
OTU_7940	158	86	23	52	4	17	48	61	48	96	28	111	25	21	39	26	15	0	k__Bacteria; p__Firmicutes; c__Clostridia; o__Clostridiales; f__Lachnospiraceae; g__Syntrophococcus; s__uncultured bacterium
OTU_186	36	73	21	38	41	39	35	13	58	25	40	30	35	38	32	10	47	45	k__Bacteria; p__Firmicutes; c__Clostridia; o__Clostridiales; f__Christensenellaceae; g__Christensenellaceae R-7 group
OTU_85	84	143	201	113	82	148	151	105	134	141	159	127	61	101	155	92	38	6	k__Bacteria; p__Bacteroidetes; c__Bacteroidia; o__Bacteroidales; f__Prevotellaceae
OTU_440	97	19	35	68	45	18	24	52	24	51	68	53	51	25	43	26	31	10	k__Bacteria; p__Firmicutes; c__Clostridia; o__Clostridiales; f__Ruminococcaceae; g__Ruminococcaceae UCG-014; s__uncultured rumen bacterium
OTU_5	834	652	469	532	350	681	499	748	460	927	575	1518	461	1115	1704	1217	671	138	k__Bacteria; p__Bacteroidetes; c__Bacteroidia; o__Bacteroidales; f__Prevotellaceae; g__Prevotella 7; s__uncultured bacterium
OTU_432	7	13	9	30	7	15	10	9	2	16	7	15	9	0	4	2	9	3	k__Bacteria; p__Firmicutes; c__Clostridia; o__Clostridiales; f__Lachnospiraceae; g__Lachnospiraceae NK4A136 group; s__uncultured rumen bacterium
OTU_19	1524	1091	1277	757	259	786	704	2240	1573	2358	880	1449	772	780	2007	1191	328	81	k__Bacteria; p__Bacteroidetes; c__Bacteroidia; o__Bacteroidales; f__Prevotellaceae; g__Prevotella 7
OTU_225	44	42	151	40	92	50	38	41	63	40	73	24	75	44	50	81	81	102	k__Bacteria; p__Bacteroidetes; c__Bacteroidia; o__Bacteroidales; f__Prevotellaceae; g__Prevotella 1
OTU_68	283	263	47	264	45	115	222	311	167	198	81	242	154	69	73	72	136	18	k__Bacteria; p__Firmicutes; c__Clostridia; o__Clostridiales; f__Ruminococcaceae; g__Ruminococcaceae UCG-014; s__uncultured bacterium
OTU_104	104	121	44	142	63	43	144	65	41	49	61	106	66	40	74	54	62	56	k__Bacteria; p__Firmicutes; c__Clostridia; o__Clostridiales; f__Ruminococcaceae; g__Ruminococcaceae UCG-014; s__uncultured rumen bacterium
OTU_361	79	66	0	18	0	0	7	12	0	20	10	31	33	0	0	0	0	0	k__Bacteria; p__Firmicutes; c__Clostridia; o__Clostridiales; f__Lachnospiraceae; g__Lachnospiraceae NK3A20 group
OTU_13	594	616	72	384	49	90	269	262	422	346	158	430	422	13	145	72	117	143	k__Bacteria; p__Firmicutes; c__Clostridia; o__Clostridiales; f__Lachnospiraceae; g__Lachnospiraceae NK3A20 group
OTU_230	119	135	7	59	1	22	57	142	7	41	23	91	60	18	15	0	5	0	k__Bacteria; p__Firmicutes; c__Clostridia; o__Clostridiales; f__Lachnospiraceae; g__Shuttleworthia
OTU_412	22	27	2	19	12	8	19	48	3	5	9	54	34	10	14	3	4	0	k__Bacteria; p__Firmicutes; c__Clostridia; o__Clostridiales; f__Ruminococcaceae; g__Ruminococcaceae UCG-014; s__gut metagenome
OTU_32	106	126	355	147	308	171	246	143	202	149	216	71	146	209	199	160	109	128	k__Bacteria; p__Bacteroidetes; c__Bacteroidia; o__Bacteroidales; f__Prevotellaceae; g__Prevotella 1; s__uncultured rumen bacterium
OTU_422	8	0	7	13	7	14	1	4	18	8	7	4	8	7	16	8	8	11	k__Bacteria; p__Bacteroidetes; c__Bacteroidia; o__Bacteroidales; f__Rikenellaceae; g__Rikenellaceae RC9 gut group; s__uncultured rumen bacterium
OTU_24	126	240	331	187	399	175	194	205	189	73	506	141	223	470	220	348	390	430	k__Bacteria; p__Firmicutes; c__Clostridia; o__Clostridiales; f__Ruminococcaceae; g__Ruminococcaceae NK4A214 group; s__uncultured bacterium
OTU_78	135	159	90	147	170	109	118	109	100	90	185	162	152	189	131	112	231	42	k__Bacteria; p__Firmicutes; c__Clostridia; o__Clostridiales; f__Ruminococcaceae; g__Ruminococcaceae UCG-014
OTU_108	78	30	29	36	33	29	36	21	27	29	52	31	50	0	21	41	58	146	k__Bacteria; p__Firmicutes; c__Erysipelotrichia; o__Erysipelotrichales; f__Erysipelotrichaceae; g__Sharpea; s__Lachnospiraceae bacterium DJF_LS97k1
OTU_147	46	47	22	78	19	52	38	27	14	40	45	38	46	29	17	8	11	11	k__Bacteria; p__Firmicutes; c__Clostridia; o__Clostridiales; f__Lachnospiraceae; g__Lachnospiraceae NK4A136 group; s__uncultured rumen bacterium
OTU_477	18	23	0	17	0	0	1	43	0	16	4	26	1	0	3	0	0	0	k__Bacteria; p__Firmicutes; c__Clostridia; o__Clostridiales; f__Lachnospiraceae
OTU_46	681	390	57	194	39	58	108	242	87	270	114	319	150	66	52	82	74	17	k__Bacteria; p__Firmicutes; c__Clostridia; o__Clostridiales; f__Lachnospiraceae; g__Syntrophococcus; s__uncultured bacterium
OTU_3163	29	45	16	26	33	34	10	8	69	8	16	10	30	4	17	27	12	57	k__Bacteria; p__Firmicutes; c__Clostridia; o__Clostridiales; f__Lachnospiraceae; g__Lachnospiraceae NK3A20 group
OTU_2476	3	5	39	10	3	20	12	12	11	11	20	10	2	14	30	30	8	4	k__Bacteria; p__Bacteroidetes; c__Bacteroidia; o__Bacteroidales; f__Prevotellaceae; g__Prevotella 1; s__uncultured bacterium
OTU_112	85	118	39	67	25	29	15	34	58	12	30	25	126	57	27	43	27	20	k__Bacteria; p__Patescibacteria; c__Saccharimonadia; o__Saccharimonadales; f__Saccharimonadaceae; g__Candidatus Saccharimonas; s__uncultured bacterium
OTU_70	288	209	42	146	26	83	110	236	34	133	51	192	112	82	52	19	10	4	k__Bacteria; p__Firmicutes; c__Clostridia; o__Clostridiales; f__Lachnospiraceae
OTU_43	71	88	90	100	257	142	48	48	270	19	85	39	76	82	72	266	212	190	k__Bacteria; p__Firmicutes; c__Clostridia; o__Clostridiales; f__Lachnospiraceae; g__Acetitomaculum
OTU_75	88	407	187	278	131	415	567	265	126	448	410	285	261	148	209	123	86	41	k__Bacteria; p__Bacteroidetes; c__Bacteroidia; o__Bacteroidales; f__Muribaculaceae; g__uncultured rumen bacterium; s__uncultured rumen bacterium
OTU_113	30	110	94	95	43	84	74	41	31	102	94	66	47	65	83	86	43	46	k__Bacteria; p__Bacteroidetes; c__Bacteroidia; o__Bacteroidales; f__Prevotellaceae; g__Prevotella 1
OTU_1228	6	3	0	2	0	0	0	0	1	0	0	1	3	0	0	0	0	0	k__Bacteria; p__Firmicutes; c__Erysipelotrichia; o__Erysipelotrichales; f__Erysipelotrichaceae; g__Catenisphaera; s__uncultured rumen bacterium
OTU_3727	8	1	2	1	4	2	0	1	3	4	2	2	4	4	4	1	4	10	k__Bacteria; p__Firmicutes; c__Clostridia; o__Clostridiales
OTU_1214	10	15	27	16	8	75	44	82	29	24	30	15	28	28	39	57	156	17	k__Bacteria; p__Firmicutes; c__Negativicutes; o__Selenomonadales; f__Veillonellaceae; g__Dialister
OTU_424	15	0	26	7	40	18	18	19	13	30	20	18	13	50	26	23	16	5	k__Bacteria; p__Bacteroidetes; c__Bacteroidia; o__Bacteroidales; f__Prevotellaceae; g__Prevotella 1; s__uncultured bacterium
OTU_93	11	12	28	21	47	30	4	4	201	4	36	12	29	30	25	68	42	248	k__Bacteria; p__Firmicutes; c__Clostridia; o__Clostridiales; f__Lachnospiraceae; g__Marvinbryantia; s__uncultured rumen bacterium
OTU_341	68	77	55	157	91	47	32	27	34	59	37	56	37	34	49	51	40	40	k__Bacteria; p__Firmicutes; c__Clostridia; o__Clostridiales; f__Lachnospiraceae; g__Pseudobutyrivibrio; s__uncultured rumen bacterium
OTU_1551	0	13	0	1	1	0	1	2	5	0	1	0	10	0	0	0	0	1	k__Bacteria; p__Proteobacteria; c__Gammaproteobacteria; o__Enterobacteriales; f__Enterobacteriaceae; g__Enterobacter
OTU_1314	13	93	353	102	355	135	62	82	123	133	119	61	84	137	140	146	66	105	k__Bacteria; p__Bacteroidetes; c__Bacteroidia; o__Bacteroidales; f__Prevotellaceae; g__Prevotella 1; s__uncultured rumen bacterium
OTU_840	14	15	17	1	1	2	9	15	1	17	5	9	7	4	22	6	2	4	k__Bacteria; p__Firmicutes; c__Negativicutes; o__Selenomonadales; f__Veillonellaceae; g__uncultured; s__uncultured rumen bacterium
OTU_194	15	26	12	23	10	49	24	11	30	7	16	30	31	7	6	19	60	19	k__Bacteria; p__Bacteroidetes; c__Bacteroidia; o__Bacteroidales; f__F082; g__uncultured rumen bacterium; s__uncultured rumen bacterium
OTU_40	158	203	27	199	48	87	93	92	330	66	112	168	237	16	88	34	119	126	k__Bacteria; p__Firmicutes; c__Clostridia; o__Clostridiales; f__Lachnospiraceae; g__Lachnospiraceae NK3A20 group
OTU_65	172	168	128	165	120	202	171	127	242	140	164	138	225	156	181	80	109	32	k__Bacteria; p__Bacteroidetes; c__Bacteroidia; o__Bacteroidales; f__Prevotellaceae; g__Prevotella 1; s__uncultured rumen bacterium
OTU_125	83	112	91	96	22	82	86	277	73	135	98	180	115	65	143	50	52	1	k__Bacteria; p__Bacteroidetes; c__Bacteroidia; o__Bacteroidales; f__Prevotellaceae; g__Prevotella 7; s__uncultured bacterium
OTU_252	43	22	0	23	1	6	2	10	9	8	2	17	37	1	1	1	3	0	k__Bacteria; p__Patescibacteria; c__Saccharimonadia; o__Saccharimonadales
OTU_7115	1	0	0	3	0	0	0	0	5	0	2	0	3	1	0	1	3	3	k__Bacteria; p__Firmicutes; c__Clostridia; o__Clostridiales; f__Lachnospiraceae; g__Syntrophococcus; s__uncultured bacterium
OTU_72	72	50	52	87	55	60	68	100	10	77	26	130	30	13	50	27	10	1	k__Bacteria; p__Firmicutes; c__Clostridia; o__Clostridiales; f__Lachnospiraceae; g__Lachnospira; s__uncultured bacterium
OTU_280	10	26	16	17	5	27	12	7	17	10	19	25	13	8	19	9	26	30	k__Bacteria; p__Firmicutes; c__Clostridia; o__Clostridiales; f__Lachnospiraceae; g__Moryella; s__bacterium YAD2002
OTU_1757	34	19	33	20	39	26	27	12	21	25	28	21	26	10	15	15	12	15	k__Bacteria; p__Bacteroidetes; c__Bacteroidia; o__Bacteroidales; f__Prevotellaceae; g__Prevotella 1; s__uncultured rumen bacterium
OTU_16	190	407	329	406	556	759	326	110	1032	121	310	127	461	595	327	312	888	1888	k__Bacteria; p__Bacteroidetes; c__Bacteroidia; o__Bacteroidales; f__F082; g__uncultured rumen bacterium; s__uncultured rumen bacterium
OTU_77	192	209	121	246	207	142	173	187	184	126	187	244	225	282	236	173	247	160	k__Bacteria; p__Firmicutes; c__Clostridia; o__Clostridiales; f__Ruminococcaceae; g__Ruminococcaceae UCG-014
OTU_2772	0	0	0	2	1	2	0	0	0	0	0	3	0	1	0	1	0	2	k__Bacteria; p__Firmicutes; c__Clostridia; o__Clostridiales; f__Ruminococcaceae; g__Ruminococcaceae UCG-014
OTU_202	57	42	42	45	71	40	52	45	37	41	40	38	36	21	25	40	26	48	k__Bacteria; p__Bacteroidetes; c__Bacteroidia; o__Bacteroidales; f__Prevotellaceae; g__Prevotella 1
OTU_951	7	3	0	0	0	0	5	2	0	17	3	4	0	0	0	0	0	0	k__Bacteria; p__Firmicutes; c__Clostridia; o__Clostridiales; f__Lachnospiraceae
OTU_297	20	6	9	9	9	15	7	2	10	4	6	8	8	16	5	11	12	27	k__Bacteria; p__Bacteroidetes; c__Bacteroidia; o__Bacteroidales; f__Rikenellaceae; g__Rikenellaceae RC9 gut group; s__uncultured rumen bacterium
OTU_1362	17	15	29	30	11	66	35	277	9	51	46	63	26	20	75	56	52	1	k__Bacteria; p__Bacteroidetes; c__Bacteroidia; o__Bacteroidales; f__Prevotellaceae; g__Prevotella 7; s__uncultured bacterium
OTU_39	288	89	99	42	52	33	37	82	158	96	213	76	289	79	96	105	176	77	k__Bacteria; p__Firmicutes; c__Clostridia; o__Clostridiales; f__Family XIII; g__[Eubacterium] nodatum group; s__uncultured rumen bacterium 3C28d-4
OTU_1085	9	0	0	0	0	2	2	0	3	1	0	3	1	0	1	0	1	0	k__Bacteria; p__Firmicutes; c__Clostridia; o__Clostridiales; f__Lachnospiraceae; g__[Bacteroides] pectinophilus group; s__uncultured bacterium
OTU_148	52	28	56	44	26	42	49	108	22	90	36	98	14	27	83	96	64	8	k__Bacteria; p__Bacteroidetes; c__Bacteroidia; o__Bacteroidales; f__Prevotellaceae; g__Prevotella 7; s__uncultured rumen bacterium
OTU_265	14	9	17	8	47	30	147	69	3	73	56	46	20	6	42	48	0	0	k__Bacteria; p__Bacteroidetes; c__Bacteroidia; o__Bacteroidales; f__Muribaculaceae; g__uncultured rumen bacterium; s__uncultured rumen bacterium
OTU_863	7	3	2	4	0	2	0	3	7	2	1	5	0	0	6	0	3	0	k__Bacteria; p__Tenericutes; c__Mollicutes; o__Mollicutes RF39
OTU_212	13	23	42	27	29	29	10	18	5	19	26	7	26	10	33	76	19	21	k__Bacteria; p__Bacteroidetes; c__Bacteroidia; o__Bacteroidales; f__Prevotellaceae; g__Prevotella 1
OTU_66	433	128	19	47	1	6	10	21	44	86	51	112	85	1	14	3	3	15	k__Bacteria; p__Firmicutes; c__Erysipelotrichia; o__Erysipelotrichales; f__Erysipelotrichaceae; g__Erysipelotrichaceae UCG-002; s__uncultured bacterium
OTU_81	58	64	53	86	81	52	53	33	99	63	49	46	67	55	31	31	34	35	k__Bacteria; p__Firmicutes; c__Clostridia; o__Clostridiales; f__Ruminococcaceae; g__Saccharofermentans; s__uncultured rumen bacterium
OTU_62	100	165	205	140	101	243	484	182	76	263	225	187	175	108	235	112	56	21	k__Bacteria; p__Bacteroidetes; c__Bacteroidia; o__Bacteroidales; f__Muribaculaceae; g__uncultured rumen bacterium; s__uncultured rumen bacterium
OTU_342	6	6	15	6	17	30	15	27	11	4	20	23	17	24	26	23	10	6	k__Bacteria; p__Firmicutes; c__Negativicutes; o__Selenomonadales; f__Acidaminococcaceae; g__Succiniclasticum; s__uncultured rumen bacterium
OTU_48	179	190	28	105	0	48	57	63	501	73	130	88	75	83	25	49	3	19	k__Bacteria; p__Firmicutes; c__Clostridia; o__Clostridiales; f__Lachnospiraceae; g__Roseburia; s__uncultured rumen bacterium
OTU_2410	3	0	1	2	7	1	1	0	1	9	6	9	1	0	4	3	10	14	k__Bacteria; p__Tenericutes; c__Mollicutes; o__Mollicutes RF39; f__uncultured Erysipelotrichaceae bacterium; g__uncultured Erysipelotrichaceae bacterium; s__uncultured Erysipelotrichaceae bacterium
OTU_79	358	314	98	160	27	73	159	185	97	279	72	188	86	84	74	30	33	6	k__Bacteria; p__Firmicutes; c__Clostridia; o__Clostridiales; f__Lachnospiraceae
OTU_2372	4	7	15	13	7	8	9	15	7	0	14	18	9	4	14	10	13	9	k__Bacteria; p__Patescibacteria; c__Saccharimonadia; o__Saccharimonadales; f__Saccharimonadaceae; g__Candidatus Saccharimonas
OTU_165	96	207	174	189	253	134	209	104	173	145	157	162	112	185	143	103	115	113	k__Bacteria; p__Bacteroidetes; c__Bacteroidia; o__Bacteroidales; f__Prevotellaceae; g__Prevotella 1
OTU_14	93	301	276	299	563	264	276	256	305	200	304	259	482	1700	378	570	736	795	k__Bacteria; p__Firmicutes; c__Clostridia; o__Clostridiales; f__Ruminococcaceae; g__Ruminococcaceae NK4A214 group; s__uncultured rumen bacterium
OTU_398	9	18	8	18	7	11	22	8	26	6	7	11	23	17	12	18	27	8	k__Bacteria; p__Firmicutes; c__Clostridia; o__Clostridiales; f__Ruminococcaceae; g__[Eubacterium] coprostanoligenes group
OTU_959	14	25	1	23	7	4	13	14	10	8	7	17	6	5	8	7	12	5	k__Bacteria; p__Tenericutes; c__Mollicutes; o__Mollicutes RF39
OTU_353	21	28	19	19	4	12	37	37	8	18	6	26	10	4	27	40	7	2	k__Bacteria; p__Bacteroidetes; c__Bacteroidia; o__Bacteroidales; f__Prevotellaceae; g__Prevotella 7; s__Prevotella sp. RZ
OTU_38	51	62	112	63	99	54	25	56	63	15	167	66	78	94	74	83	178	118	k__Bacteria; p__Firmicutes; c__Clostridia; o__Clostridiales; f__Ruminococcaceae; g__Ruminococcaceae UCG-014
OTU_142	38	58	49	50	63	50	27	30	57	19	79	24	56	28	58	32	69	15	k__Bacteria; p__Bacteroidetes; c__Bacteroidia; o__Bacteroidales; f__Prevotellaceae; g__Prevotella 1; s__uncultured rumen bacterium
OTU_8	120	24	3379	339	1230	916	174	673	134	407	390	292	412	318	949	2115	938	210	k__Bacteria; p__Firmicutes; c__Negativicutes; o__Selenomonadales; f__Acidaminococcaceae; g__Succiniclasticum; s__uncultured rumen bacterium
OTU_25	113	113	61	80	32	568	103	272	19	311	113	914	97	174	246	76	54	10	k__Bacteria; p__Firmicutes; c__Clostridia; o__Clostridiales; f__Lachnospiraceae; g__Oribacterium; s__uncultured rumen bacterium 4C28d-13
OTU_275	8	10	17	15	13	34	16	13	3	16	34	16	19	9	18	15	7	11	k__Bacteria; p__Bacteroidetes; c__Bacteroidia; o__Bacteroidales; f__Prevotellaceae; g__Prevotella 1; s__uncultured rumen bacterium
OTU_130	42	15	57	13	18	20	7	20	10	20	24	9	26	15	28	24	52	8	k__Bacteria; p__Firmicutes; c__Negativicutes; o__Selenomonadales; f__Veillonellaceae; g__Schwartzia; s__uncultured bacterium
OTU_84	31	66	117	44	25	104	85	69	56	40	68	56	57	20	48	18	9	1	k__Bacteria; p__Bacteroidetes; c__Bacteroidia; o__Bacteroidales; f__Prevotellaceae; g__Prevotella 1; s__uncultured bacterium
OTU_31	458	318	415	249	88	269	271	256	122	408	223	299	121	77	106	92	62	37	k__Bacteria; p__Proteobacteria; c__Gammaproteobacteria; o__Aeromonadales; f__Succinivibrionaceae; g__Succinivibrionaceae UCG-001; s__uncultured rumen bacterium
OTU_801	6	13	11	6	12	14	5	5	13	1	9	6	14	8	8	5	15	7	k__Bacteria; p__Bacteroidetes; c__Bacteroidia; o__Bacteroidales; f__Prevotellaceae; g__Prevotella 1
OTU_22	63	76	138	184	55	594	70	345	81	224	304	368	237	338	503	645	265	24	k__Bacteria; p__Bacteroidetes; c__Bacteroidia; o__Bacteroidales; f__Prevotellaceae
OTU_35	32	71	81	61	203	54	19	26	73	9	154	31	209	164	81	134	151	256	k__Bacteria; p__Firmicutes; c__Clostridia; o__Clostridiales; f__Ruminococcaceae; g__Ruminococcaceae NK4A214 group
OTU_381	37	30	6	9	9	4	18	8	94	35	17	11	10	0	2	10	14	24	k__Bacteria; p__Firmicutes; c__Clostridia; o__Clostridiales; f__Lachnospiraceae; g__Syntrophococcus; s__uncultured bacterium
OTU_21	230	143	7	114	0	43	145	102	123	65	100	140	99	28	34	1	0	0	k__Bacteria; p__Bacteroidetes; c__Bacteroidia; o__Bacteroidales; f__p-2534-18B5 gut group; g__uncultured bacterium; s__uncultured bacterium
OTU_3363	6	2	1	12	3	25	9	4	1	18	13	10	16	1	1	0	2	0	k__Bacteria; p__Firmicutes; c__Clostridia; o__Clostridiales; f__Ruminococcaceae; g__Ruminococcus 1
OTU_1283	2	3	1	0	0	0	3	2	1	4	1	3	2	0	0	0	0	0	k__Bacteria; p__Actinobacteria; c__Coriobacteriia; o__Coriobacteriales; f__Atopobiaceae
OTU_1767	15	41	9	42	2	44	25	34	1	25	20	51	26	14	3	3	11	5	k__Bacteria; p__Firmicutes; c__Clostridia; o__Clostridiales; f__Lachnospiraceae; g__[Eubacterium] ruminantium group; s__uncultured rumen bacterium
OTU_429	1	0	6	9	7	12	3	2	1	13	14	2	6	10	4	5	1	9	k__Bacteria; p__Firmicutes; c__Clostridia; o__Clostridiales; f__Ruminococcaceae; g__Ruminococcaceae UCG-010
OTU_184	39	32	8	12	19	10	1	6	169	8	19	18	15	7	3	10	9	52	k__Bacteria; p__Firmicutes; c__Clostridia; o__Clostridiales; f__Lachnospiraceae; g__Acetitomaculum; s__uncultured bacterium
OTU_307	79	39	59	20	58	14	40	48	10	85	19	16	14	5	29	24	20	3	k__Bacteria; p__Firmicutes; c__Negativicutes; o__Selenomonadales; f__Veillonellaceae; g__Selenomonas 3; s__uncultured bacterium
OTU_50	193	144	79	48	36	17	9	8	101	56	157	123	236	15	89	42	41	207	k__Bacteria; p__Firmicutes; c__Clostridia; o__Clostridiales; f__Ruminococcaceae; g__Ruminococcus 2; s__uncultured bacterium
OTU_204	13	23	1	20	0	9	21	6	8	16	10	40	16	2	8	8	0	0	k__Bacteria; p__Firmicutes; c__Clostridia; o__Clostridiales; f__Eubacteriaceae; g__Pseudoramibacter; s__uncultured bacterium
OTU_337	15	14	35	9	25	10	15	10	18	12	19	19	8	11	13	21	10	4	k__Bacteria; p__Bacteroidetes; c__Bacteroidia; o__Bacteroidales; f__Prevotellaceae; g__Prevotella 1
OTU_726	8	10	11	0	0	8	17	2	6	2	16	3	11	0	0	0	0	0	k__Bacteria; p__Firmicutes; c__Bacilli; o__Lactobacillales; f__Carnobacteriaceae; g__Carnobacterium; s__uncultured bacterium
OTU_199	40	41	126	70	76	169	33	21	65	42	99	24	90	16	31	28	18	42	k__Bacteria; p__Bacteroidetes; c__Bacteroidia; o__Bacteroidales; f__Prevotellaceae; g__uncultured; s__uncultured rumen bacterium
OTU_117	47	67	71	81	75	91	91	99	57	81	102	77	131	50	33	54	33	30	k__Bacteria; p__Bacteroidetes; c__Bacteroidia; o__Bacteroidales; f__Muribaculaceae; g__uncultured rumen bacterium; s__uncultured rumen bacterium
OTU_2998	5	8	5	14	5	21	9	17	7	10	15	21	4	15	5	2	12	0	k__Bacteria; p__Firmicutes; c__Clostridia; o__Clostridiales; f__Lachnospiraceae; g__[Eubacterium] ruminantium group; s__uncultured rumen bacterium
OTU_10	228	361	654	767	1799	638	475	359	904	375	824	401	1199	2582	1053	1309	2199	2895	k__Bacteria; p__Firmicutes; c__Clostridia; o__Clostridiales; f__Ruminococcaceae; g__Ruminococcaceae NK4A214 group; s__uncultured rumen bacterium
OTU_64	195	137	21	142	8	48	36	89	71	89	74	154	150	15	90	65	16	5	k__Bacteria; p__Firmicutes; c__Erysipelotrichia; o__Erysipelotrichales; f__Erysipelotrichaceae; g__Erysipelotrichaceae UCG-007; s__uncultured bacterium
OTU_109	49	6	67	78	60	60	67	40	9	109	57	55	59	60	40	39	48	53	k__Bacteria; p__Firmicutes; c__Clostridia; o__Clostridiales; f__Lachnospiraceae; g__Lachnospiraceae AC2044 group; s__uncultured rumen bacterium
OTU_52	36	79	67	110	109	143	95	70	78	44	139	79	128	38	98	80	92	60	k__Bacteria; p__Bacteroidetes; c__Bacteroidia; o__Bacteroidales; f__Prevotellaceae; g__Prevotella 1; s__uncultured bacterium
OTU_662	2	8	6	2	0	5	2	4	12	3	4	1	2	4	0	0	0	1	k__Bacteria; p__Bacteroidetes; c__Bacteroidia; o__Bacteroidales; f__Prevotellaceae; g__Prevotellaceae UCG-003
OTU_733	48	39	28	57	40	14	16	16	25	41	31	47	52	36	37	27	32	72	k__Bacteria; p__Firmicutes; c__Clostridia; o__Clostridiales; f__Ruminococcaceae; g__Ruminococcaceae UCG-014; s__uncultured rumen bacterium
OTU_274	19	31	27	40	10	40	11	6	19	18	40	23	25	8	23	7	7	4	k__Bacteria; p__Bacteroidetes; c__Bacteroidia; o__Bacteroidales; f__uncultured; g__uncultured rumen bacterium; s__uncultured rumen bacterium
OTU_1285	2	2	0	1	0	6	1	4	2	2	2	0	1	0	0	0	0	0	k__Bacteria; p__Bacteroidetes; c__Bacteroidia; o__Bacteroidales; f__Prevotellaceae
OTU_781	8	17	7	16	8	30	11	22	7	9	21	12	13	0	8	8	4	0	k__Bacteria; p__Bacteroidetes; c__Bacteroidia; o__Bacteroidales; f__Muribaculaceae
OTU_9418	9	26	21	5	13	19	31	24	24	41	22	29	3	54	42	35	18	1	k__Bacteria; p__Bacteroidetes; c__Bacteroidia; o__Bacteroidales; f__Prevotellaceae; g__Prevotella 7; s__uncultured bacterium
OTU_33	443	243	54	110	21	20	72	81	319	101	155	82	119	33	41	81	102	134	k__Bacteria; p__Firmicutes; c__Clostridia; o__Clostridiales; f__Lachnospiraceae; g__[Ruminococcus] gauvreauii group; s__uncultured rumen bacterium
OTU_251	19	12	82	40	19	37	151	35	16	141	65	49	62	17	44	30	5	2	k__Bacteria; p__Bacteroidetes; c__Bacteroidia; o__Bacteroidales; f__Muribaculaceae; g__uncultured rumen bacterium; s__uncultured rumen bacterium
OTU_173	198	35	8	5	1	1	14	13	16	26	24	29	22	0	2	1	2	4	k__Bacteria; p__Firmicutes; c__Erysipelotrichia; o__Erysipelotrichales; f__Erysipelotrichaceae; g__Erysipelotrichaceae UCG-002; s__uncultured bacterium
OTU_47	48	211	216	144	144	246	361	181	153	137	222	121	123	363	259	192	149	115	k__Bacteria; p__Bacteroidetes; c__Bacteroidia; o__Bacteroidales; f__Prevotellaceae; g__Prevotella 1; s__unidentified rumen bacterium 12-130
OTU_10902	2	0	0	0	0	0	0	0	0	0	0	0	0	0	0	0	0	0	k__Bacteria; p__Firmicutes
OTU_553	11	1	5	1	4	1	78	15	0	42	17	14	2	0	12	7	0	0	k__Bacteria; p__Bacteroidetes; c__Bacteroidia; o__Bacteroidales; f__Muribaculaceae; g__uncultured rumen bacterium; s__uncultured rumen bacterium
OTU_937	7	4	4	11	7	5	2	5	6	5	7	8	6	6	4	2	3	2	k__Bacteria; p__Firmicutes; c__Clostridia; o__Clostridiales; f__Lachnospiraceae; g__Lachnospiraceae UCG-008; s__uncultured rumen bacterium
OTU_221	3	19	8	33	21	14	8	4	26	9	12	13	23	29	8	15	16	33	k__Bacteria; p__Bacteroidetes; c__Bacteroidia; o__Bacteroidales; f__Rikenellaceae; g__Rikenellaceae RC9 gut group; s__uncultured rumen bacterium
OTU_551	3	4	2	4	7	5	1	1	21	1	6	1	2	5	1	2	6	6	k__Bacteria; p__Firmicutes; c__Clostridia; o__Clostridiales; f__Family XIII; g__[Eubacterium] nodatum group
OTU_2723	8	14	3	12	4	24	6	11	5	2	4	14	15	12	5	3	4	1	k__Bacteria; p__Firmicutes; c__Clostridia; o__Clostridiales; f__Lachnospiraceae; g__[Eubacterium] ruminantium group
OTU_127	85	156	394	102	135	69	74	78	211	132	119	71	105	139	136	182	145	253	k__Bacteria; p__Bacteroidetes; c__Bacteroidia; o__Bacteroidales; f__Prevotellaceae; g__Prevotella 1
OTU_1417	20	0	0	1	3	0	0	0	0	0	0	0	1	0	0	0	0	0	k__Bacteria; p__Firmicutes; c__Bacilli; o__Bacillales; f__Planococcaceae; g__Psychrobacillus
OTU_10632	1	0	1	0	0	0	0	2	0	2	1	0	0	1	3	0	0	0	k__Bacteria; p__Bacteroidetes; c__Bacteroidia; o__Bacteroidales; f__Prevotellaceae; g__Prevotella 7; s__uncultured bacterium
OTU_1278	7	3	6	21	4	4	10	6	3	8	15	10	6	4	4	10	1	5	k__Bacteria; p__Bacteroidetes; c__Bacteroidia; o__Bacteroidales; f__Prevotellaceae; g__Prevotella 1
OTU_841	4	2	1	5	6	2	2	2	14	2	7	0	3	1	1	4	6	9	k__Bacteria; p__Firmicutes; c__Clostridia; o__Clostridiales; f__Lachnospiraceae; g__Lachnospiraceae FE2018 group; s__bacterium FE2018
OTU_3167	2	0	0	0	0	1	0	0	1	3	3	0	0	2	0	1	3	1	k__Bacteria; p__Firmicutes; c__Clostridia; o__Clostridiales; f__Ruminococcaceae; g__Subdoligranulum; s__uncultured bacterium
OTU_869	2	1	2	3	6	2	2	1	2	0	9	3	4	8	0	2	0	6	k__Bacteria; p__Firmicutes; c__Clostridia; o__Clostridiales; f__Family XIII; g__[Eubacterium] brachy group; s__uncultured bacterium
OTU_119	56	67	28	112	57	94	73	55	71	46	41	41	72	49	27	10	27	25	k__Bacteria; p__Firmicutes; c__Clostridia; o__Clostridiales; f__Ruminococcaceae; g__Saccharofermentans; s__uncultured bacterium
OTU_99	31	16	78	46	100	83	42	32	46	54	126	58	57	106	91	87	86	27	k__Bacteria; p__Bacteroidetes; c__Bacteroidia; o__Bacteroidales; f__Prevotellaceae; g__Prevotella 1; s__uncultured bacterium
OTU_11186	6	0	0	0	0	0	1	0	0	1	0	0	0	0	0	0	0	0	k__Bacteria
OTU_103	100	62	7	37	1	10	5	20	72	22	24	39	66	1	12	2	1	0	k__Bacteria; p__Firmicutes; c__Erysipelotrichia; o__Erysipelotrichales; f__Erysipelotrichaceae; g__Erysipelotrichaceae UCG-009; s__uncultured rumen bacterium
OTU_1489	12	0	4	1	5	2	1	1	0	1	18	5	0	8	9	16	7	3	k__Bacteria; p__Firmicutes; c__Clostridia; o__Clostridiales; f__Ruminococcaceae; g__Ruminococcaceae UCG-014
OTU_2182	2	5	0	0	0	0	0	1	0	3	2	0	0	0	0	1	0	0	k__Bacteria; p__Firmicutes; c__Negativicutes; o__Selenomonadales; f__Veillonellaceae; g__uncultured
OTU_332	6	0	11	4	13	10	0	2	30	3	9	3	3	10	17	26	9	2	k__Bacteria; p__Firmicutes; c__Clostridia; o__Clostridiales; f__Lachnospiraceae; g__Lachnospiraceae ND3007 group; s__uncultured Lachnospiraceae bacterium
OTU_18	172	350	171	334	215	191	347	142	250	119	227	166	239	165	170	113	258	171	k__Bacteria; p__Bacteroidetes; c__Bacteroidia; o__Bacteroidales; f__Prevotellaceae; g__Prevotella 1; s__uncultured rumen bacterium
OTU_60	27	51	57	61	63	53	69	50	93	70	107	86	91	111	99	119	99	139	k__Bacteria; p__Firmicutes; c__Clostridia; o__Clostridiales; f__Family XIII; g__[Eubacterium] brachy group; s__uncultured bacterium
OTU_437	5	3	6	17	11	10	2	3	38	3	8	4	41	14	10	8	14	25	k__Bacteria; p__Firmicutes; c__Clostridia; o__Clostridiales; f__Ruminococcaceae; g__Ruminiclostridium 9; s__uncultured rumen bacterium
OTU_1272	24	27	5	13	11	6	26	15	13	17	18	20	7	12	9	16	4	3	k__Bacteria; p__Firmicutes; c__Clostridia; o__Clostridiales
OTU_481	32	21	2	14	0	7	8	25	0	11	5	11	6	9	21	42	8	0	k__Bacteria; p__Firmicutes; c__Clostridia; o__Clostridiales; f__Ruminococcaceae; g__Ruminococcaceae UCG-014
OTU_9803	6	10	2	25	6	11	5	9	51	0	6	6	6	8	14	10	26	30	k__Bacteria; p__Firmicutes; c__Clostridia; o__Clostridiales; f__Lachnospiraceae; g__Acetitomaculum; s__uncultured bacterium
OTU_159	51	38	21	38	1	23	44	89	36	49	24	47	50	7	32	23	6	10	k__Bacteria; p__Firmicutes; c__Negativicutes; o__Selenomonadales; f__Acidaminococcaceae; g__Acidaminococcus; s__uncultured rumen bacterium
OTU_452	66	30	0	0	0	0	0	3	0	5	1	11	3	0	0	0	0	0	k__Bacteria; p__Firmicutes; c__Clostridia; o__Clostridiales; f__Lachnospiraceae; g__Shuttleworthia
OTU_316	54	50	157	80	190	69	27	35	62	41	47	43	64	52	66	122	120	124	k__Bacteria; p__Bacteroidetes; c__Bacteroidia; o__Bacteroidales; f__Prevotellaceae; g__Prevotella 1; s__uncultured rumen bacterium
OTU_192	14	21	12	23	22	22	12	8	46	3	12	11	31	5	17	7	15	20	k__Bacteria; p__Firmicutes; c__Erysipelotrichia; o__Erysipelotrichales; f__Erysipelotrichaceae; g__uncultured; s__uncultured rumen bacterium
OTU_44	127	92	190	106	22	146	351	640	93	338	199	208	141	110	159	55	45	3	k__Bacteria; p__Bacteroidetes; c__Bacteroidia; o__Bacteroidales; f__Prevotellaceae; g__Prevotella 7; s__uncultured bacterium
OTU_177	36	83	72	88	57	64	61	32	68	77	45	22	41	36	51	38	43	51	k__Bacteria; p__Bacteroidetes; c__Bacteroidia; o__Bacteroidales; f__Prevotellaceae; g__Prevotella 1
OTU_215	180	107	1	31	0	12	11	44	2	83	16	55	20	3	3	0	0	0	k__Bacteria; p__Firmicutes; c__Clostridia; o__Clostridiales; f__Lachnospiraceae
OTU_1843	1	0	0	3	0	0	0	1	0	0	1	1	1	0	0	0	0	0	k__Bacteria; p__Tenericutes; c__Mollicutes; o__Mollicutes RF39; f__uncultured bacterium; g__uncultured bacterium; s__uncultured bacterium
OTU_414	33	44	54	17	62	41	28	34	31	30	31	19	14	15	41	22	16	16	k__Bacteria; p__Bacteroidetes; c__Bacteroidia; o__Bacteroidales; f__Prevotellaceae; g__Prevotella 1; s__uncultured rumen bacterium
OTU_400	12	13	0	35	0	12	1	29	3	5	5	14	2	0	8	0	2	0	k__Bacteria; p__Tenericutes; c__Mollicutes; o__Mollicutes RF39
OTU_6141	8	7	5	2	4	0	9	34	1	19	3	14	2	5	20	10	7	0	k__Bacteria; p__Bacteroidetes; c__Bacteroidia; o__Bacteroidales; f__Prevotellaceae; g__Prevotella 7
OTU_57	35	65	92	119	193	208	97	59	69	37	80	67	144	350	192	167	262	252	k__Bacteria; p__Bacteroidetes; c__Bacteroidia; o__Bacteroidales; f__Bacteroidales RF16 group; g__uncultured rumen bacterium; s__uncultured rumen bacterium
OTU_26	96	186	123	233	146	212	134	165	222	87	192	238	289	269	151	136	237	203	k__Bacteria; p__Firmicutes; c__Clostridia; o__Clostridiales; f__Lachnospiraceae; g__Lachnoclostridium 1; s__uncultured rumen bacterium
OTU_2235	79	32	19	32	7	36	30	32	4	37	13	47	29	25	31	27	15	10	k__Bacteria; p__Firmicutes; c__Clostridia; o__Clostridiales; f__Lachnospiraceae; g__Roseburia
OTU_787	5	4	9	11	7	2	2	0	3	1	3	4	1	0	2	5	2	6	k__Bacteria; p__Firmicutes; c__Clostridia; o__Clostridiales; f__Lachnospiraceae
OTU_364	73	77	109	159	203	69	9	17	91	49	58	38	63	32	72	89	56	136	k__Bacteria; p__Firmicutes; c__Clostridia; o__Clostridiales; f__Lachnospiraceae; g__Butyrivibrio 2
OTU_1219	4	4	0	2	2	2	1	2	5	0	4	2	1	1	3	1	1	1	k__Bacteria; p__Tenericutes; c__Mollicutes; o__Mollicutes RF39; f__uncultured rumen bacterium; g__uncultured rumen bacterium; s__uncultured rumen bacterium
OTU_6862	2	2	6	2	7	0	3	7	3	1	11	1	3	9	11	6	10	11	k__Bacteria; p__Firmicutes; c__Clostridia; o__Clostridiales; f__Ruminococcaceae; g__Ruminococcus 2; s__uncultured rumen bacterium
OTU_179	16	28	9	24	17	43	25	22	26	16	19	7	17	50	21	7	30	9	k__Bacteria; p__Bacteroidetes; c__Bacteroidia; o__Bacteroidales; f__Rikenellaceae; g__Rikenellaceae RC9 gut group
OTU_1298	30	28	20	37	57	59	29	47	53	26	71	46	79	89	63	70	100	37	k__Bacteria; p__Firmicutes; c__Clostridia; o__Clostridiales; f__Ruminococcaceae; g__Ruminococcaceae UCG-014; s__uncultured rumen bacterium
OTU_151	58	97	15	124	41	41	14	24	72	18	34	38	85	37	32	26	46	45	k__Bacteria; p__Firmicutes; c__Clostridia; o__Clostridiales; f__Ruminococcaceae; g__Ruminococcaceae UCG-014; s__uncultured rumen bacterium
OTU_200	86	115	3	34	1	4	34	47	1	40	10	75	35	9	6	0	0	0	k__Bacteria; p__Firmicutes; c__Clostridia; o__Clostridiales; f__Lachnospiraceae
OTU_90	53	67	49	92	58	107	20	17	105	13	104	32	34	55	101	72	85	80	k__Bacteria; p__Firmicutes; c__Clostridia; o__Clostridiales; f__Lachnospiraceae; g__Acetitomaculum; s__uncultured bacterium
OTU_2316	11	27	14	22	11	3	13	15	7	10	19	8	7	8	22	7	14	15	k__Bacteria; p__Tenericutes; c__Mollicutes; o__Mollicutes RF39; f__uncultured rumen bacterium; g__uncultured rumen bacterium; s__uncultured rumen bacterium
OTU_562	16	3	7	8	1	3	2	2	0	5	3	2	1	0	1	1	0	0	k__Bacteria; p__Proteobacteria; c__Gammaproteobacteria; o__Aeromonadales; f__Succinivibrionaceae
OTU_3286	56	22	1	14	0	0	0	0	4	16	0	5	5	0	1	0	0	0	k__Bacteria; p__Firmicutes; c__Clostridia; o__Clostridiales; f__Lachnospiraceae; g__Syntrophococcus; s__uncultured bacterium
OTU_30	72	115	87	130	29	102	72	50	36	136	158	105	153	147	132	96	60	23	k__Bacteria; p__Patescibacteria; c__Gracilibacteria; o__Absconditabacteriales (SR1); f__uncultured rumen bacterium; g__uncultured rumen bacterium; s__uncultured rumen bacterium
OTU_37	49	143	60	97	73	118	32	43	52	50	119	104	71	94	100	97	172	178	k__Bacteria; p__Firmicutes; c__Clostridia; o__Clostridiales; f__Lachnospiraceae; g__Moryella; s__uncultured rumen bacterium
OTU_1839	7	5	7	9	13	9	4	2	3	6	1	2	7	0	4	2	4	9	k__Bacteria; p__Spirochaetes; c__Spirochaetia; o__Spirochaetales; f__Spirochaetaceae; g__Treponema 2; s__uncultured rumen bacterium
OTU_918	2	2	6	6	2	6	5	9	0	1	0	9	3	0	0	1	1	0	k__Bacteria; p__Firmicutes; c__Clostridia; o__Clostridiales; f__Lachnospiraceae
OTU_388	19	19	13	19	0	39	17	6	0	23	21	10	19	3	20	6	0	5	k__Bacteria; p__Bacteroidetes; c__Bacteroidia; o__Bacteroidales; f__p-2534-18B5 gut group; g__uncultured rumen bacterium; s__uncultured rumen bacterium
OTU_2753	42	18	13	28	5	22	18	11	22	9	19	14	27	10	17	12	15	15	k__Bacteria; p__Patescibacteria; c__Saccharimonadia; o__Saccharimonadales; f__Saccharimonadaceae; g__Candidatus Saccharimonas
OTU_271	13	0	8	53	6	34	12	13	9	21	36	11	12	5	16	7	7	20	k__Bacteria; p__Bacteroidetes; c__Bacteroidia; o__Bacteroidales; f__F082; g__uncultured rumen bacterium; s__uncultured rumen bacterium
OTU_3011	22	13	12	12	3	8	6	17	6	15	7	8	6	21	17	24	9	0	k__Bacteria; p__Bacteroidetes; c__Bacteroidia; o__Bacteroidales; f__Prevotellaceae
OTU_110	42	33	86	32	54	73	35	33	42	38	37	19	40	208	67	82	76	126	k__Bacteria; p__Bacteroidetes; c__Bacteroidia; o__Bacteroidales; f__Rikenellaceae; g__Rikenellaceae RC9 gut group; s__uncultured rumen bacterium
OTU_141	56	58	98	114	24	221	50	57	40	125	168	73	113	76	40	15	25	10	k__Bacteria; p__Firmicutes; c__Clostridia; o__Clostridiales; f__Ruminococcaceae; g__Ruminococcus 1
OTU_49	29	25	62	56	36	126	49	99	59	29	46	33	49	22	67	62	130	30	k__Bacteria; p__Firmicutes; c__Negativicutes; o__Selenomonadales; f__Veillonellaceae; g__Dialister; s__uncultured bacterium
OTU_371	12	4	9	17	4	19	27	47	7	20	8	22	17	3	0	1	8	3	k__Bacteria; p__Firmicutes; c__Clostridia; o__Clostridiales; f__Lachnospiraceae
OTU_10343	0	0	0	0	0	2	0	0	1	1	1	0	0	0	0	0	0	1	k__Bacteria; p__Firmicutes; c__Clostridia; o__Clostridiales; f__Lachnospiraceae
OTU_59	49	35	32	196	28	110	20	142	22	82	49	114	49	73	151	102	74	10	k__Bacteria; p__Bacteroidetes; c__Bacteroidia; o__Bacteroidales; f__Prevotellaceae; g__Prevotella 7; s__uncultured bacterium
OTU_956	2	0	0	1	6	4	1	0	9	3	1	4	5	1	2	2	1	0	k__Bacteria; p__Firmicutes; c__Clostridia; o__Clostridiales; f__Family XIII; g__Family XIII AD3011 group; s__uncultured bacterium
OTU_116	48	64	3	17	0	16	75	26	13	25	18	39	24	29	17	1	28	0	k__Bacteria; p__Bacteroidetes; c__Bacteroidia; o__Bacteroidales; f__Rikenellaceae; g__Rikenellaceae RC9 gut group; s__uncultured bacterium
OTU_410	23	13	6	12	1	5	10	24	6	18	2	22	16	4	7	3	2	0	k__Bacteria; p__Firmicutes; c__Clostridia; o__Clostridiales; f__Lachnospiraceae; g__[Eubacterium] eligens group; s__uncultured bacterium
OTU_569	2	0	1	3	7	1	2	4	12	2	7	2	1	1	8	16	3	2	k__Bacteria; p__Firmicutes; c__Clostridia; o__Clostridiales; f__Lachnospiraceae; g__Lachnospiraceae ND3007 group; s__uncultured rumen bacterium
OTU_616	3	0	4	3	4	8	0	2	0	3	5	7	8	0	4	3	6	3	k__Bacteria; p__Bacteroidetes; c__Bacteroidia; o__Bacteroidales; f__Prevotellaceae; g__Prevotellaceae UCG-003; s__uncultured rumen bacterium
OTU_668	11	17	6	14	9	9	16	9	1	18	18	5	5	13	12	12	10	7	k__Bacteria; p__Firmicutes; c__Clostridia; o__Clostridiales; f__Lachnospiraceae; g__Lachnospiraceae UCG-008; s__uncultured rumen bacterium
OTU_2987	45	40	12	37	46	15	27	19	17	12	40	34	33	13	29	31	31	11	k__Bacteria; p__Firmicutes; c__Clostridia; o__Clostridiales; f__Ruminococcaceae; g__Ruminococcaceae UCG-014; s__uncultured rumen bacterium
OTU_205	13	31	26	20	31	8	9	14	54	11	38	20	54	16	21	13	22	43	k__Bacteria; p__Firmicutes; c__Clostridia; o__Clostridiales; f__Lachnospiraceae; g__Lachnospiraceae UCG-008; s__uncultured rumen bacterium
OTU_2842	6	2	5	8	3	4	0	3	5	4	3	2	1	0	7	1	4	6	k__Bacteria; p__Firmicutes; c__Clostridia; o__Clostridiales; f__Lachnospiraceae; g__Lachnospiraceae AC2044 group
OTU_249	33	29	10	34	28	36	11	7	88	6	24	20	40	5	16	27	45	89	k__Bacteria; p__Firmicutes; c__Clostridia; o__Clostridiales; f__Lachnospiraceae; g__Lachnospiraceae NK3A20 group; s__uncultured rumen bacterium
OTU_193	17	57	11	5	7	23	21	8	8	38	5	27	10	30	17	7	15	1	k__Bacteria; p__Patescibacteria; c__Gracilibacteria; o__Absconditabacteriales (SR1); f__uncultured rumen bacterium; g__uncultured rumen bacterium; s__uncultured rumen bacterium
OTU_1326	38	6	21	5	3	16	8	5	7	28	34	17	9	7	7	5	1	6	k__Bacteria; p__Firmicutes; c__Clostridia; o__Clostridiales; f__Lachnospiraceae; g__[Eubacterium] ruminantium group
OTU_416	9	12	6	11	8	23	3	7	18	1	4	6	13	1	8	7	17	18	k__Bacteria; p__Bacteroidetes; c__Bacteroidia; o__Bacteroidales; f__F082; g__uncultured rumen bacterium; s__uncultured rumen bacterium
OTU_166	13	7	12	40	51	26	8	6	59	5	28	16	52	2	24	8	17	40	k__Bacteria; p__Firmicutes; c__Clostridia; o__Clostridiales; f__Lachnospiraceae; g__Lachnospiraceae NK3A20 group; s__uncultured rumen bacterium
OTU_707	4	7	6	3	5	2	3	2	0	1	19	3	5	2	2	4	3	3	k__Bacteria; p__Firmicutes; c__Clostridia; o__Clostridiales; f__Ruminococcaceae; g__Ruminococcaceae UCG-001; s__uncultured bacterium
OTU_231	6	9	18	26	16	22	0	8	8	12	43	1	16	21	29	2	16	7	k__Bacteria; p__Bacteroidetes; c__Bacteroidia; o__Bacteroidales; f__Prevotellaceae; g__Prevotellaceae UCG-003; s__uncultured rumen bacterium
OTU_258	7	9	14	4	0	3	87	24	1	39	7	7	5	0	3	0	0	0	k__Bacteria; p__Synergistetes; c__Synergistia; o__Synergistales; f__Synergistaceae; g__Pyramidobacter
OTU_105	49	21	14	69	27	12	5	5	40	18	23	45	28	1	8	41	29	66	k__Bacteria; p__Actinobacteria; c__Coriobacteriia; o__Coriobacteriales; f__Atopobiaceae; g__Olsenella; s__uncultured bacterium
OTU_3444	6	19	0	0	0	0	0	0	0	0	1	0	0	0	0	0	0	0	k__Bacteria; p__Firmicutes; c__Clostridia; o__Clostridiales; f__Ruminococcaceae; g__Ruminococcaceae UCG-014
OTU_228	12	33	15	34	17	27	6	15	14	17	20	17	17	7	13	5	3	26	k__Bacteria; p__Firmicutes; c__Clostridia; o__Clostridiales; f__Ruminococcaceae; g__Ruminococcaceae V9D2013 group
OTU_92	51	61	17	39	14	21	34	26	32	7	52	30	45	25	21	23	10	21	k__Bacteria; p__Patescibacteria; c__Saccharimonadia; o__Saccharimonadales; f__Saccharimonadaceae; g__Candidatus Saccharimonas
OTU_94	60	93	72	113	37	56	26	53	54	57	58	69	56	25	41	30	27	23	k__Bacteria; p__Proteobacteria; c__Deltaproteobacteria; o__Desulfovibrionales; f__Desulfovibrionaceae; g__Desulfovibrio; s__gut metagenome
OTU_155	6	20	20	32	52	53	22	17	14	11	26	17	41	28	28	38	62	52	k__Bacteria; p__Bacteroidetes; c__Bacteroidia; o__Bacteroidales; f__Bacteroidales RF16 group; g__uncultured rumen bacterium; s__uncultured rumen bacterium
OTU_501	14	11	14	11	3	11	16	25	2	19	4	4	3	1	11	14	5	1	k__Bacteria; p__Firmicutes; c__Negativicutes; o__Selenomonadales; f__Veillonellaceae; g__uncultured; s__uncultured rumen bacterium 4C28d-2
OTU_4125	1	0	0	0	0	1	3	2	0	0	0	0	0	0	0	0	0	1	k__Bacteria; p__Firmicutes; c__Clostridia; o__Clostridiales; f__Lachnospiraceae; g__Blautia
OTU_9590	0	1	1	1	1	0	0	0	2	0	0	2	0	0	0	4	2	1	k__Bacteria; p__Firmicutes; c__Clostridia; o__Clostridiales; f__Lachnospiraceae
OTU_82	37	44	22	82	69	60	0	7	24	19	105	28	38	17	6	5	92	24	k__Bacteria; p__Firmicutes; c__Clostridia; o__Clostridiales; f__Ruminococcaceae; g__Ruminococcus 2; s__uncultured bacterium
OTU_9580	4	0	0	0	4	0	0	1	0	0	2	3	2	0	3	3	1	0	k__Bacteria; p__Firmicutes; c__Clostridia; o__Clostridiales; f__Ruminococcaceae; g__Ruminococcaceae UCG-014; s__uncultured rumen bacterium
OTU_74	31	27	81	56	91	82	93	32	39	119	150	31	64	84	105	108	67	73	k__Bacteria; p__Firmicutes; c__Clostridia; o__Clostridiales; f__Family XIII; g__Family XIII AD3011 group; s__uncultured bacterium
OTU_2660	7	5	8	10	9	9	3	0	5	8	9	6	2	21	5	3	3	0	k__Bacteria; p__Firmicutes; c__Clostridia; o__Clostridiales; f__Lachnospiraceae; g__[Eubacterium] ruminantium group
OTU_2513	1	0	1	1	1	2	0	1	2	0	0	1	0	0	0	4	1	3	k__Bacteria; p__Firmicutes; c__Clostridia; o__Clostridiales; f__Lachnospiraceae; g__Blautia; s__uncultured bacterium
OTU_1380	7	6	33	5	15	25	9	6	20	10	10	1	5	5	9	7	1	10	k__Bacteria; p__Bacteroidetes; c__Bacteroidia; o__Bacteroidales; f__Prevotellaceae; g__Prevotella 1; s__uncultured rumen bacterium
OTU_1869	28	9	47	7	26	20	164	47	1	47	46	25	20	7	83	37	11	0	k__Bacteria; p__Bacteroidetes; c__Bacteroidia; o__Bacteroidales; f__Muribaculaceae; g__uncultured rumen bacterium; s__uncultured rumen bacterium
OTU_1477	0	0	1	2	0	0	0	1	0	0	0	0	1	2	0	0	0	0	k__Bacteria; p__Firmicutes; c__Clostridia; o__Clostridiales; f__Ruminococcaceae; g__Ruminococcaceae UCG-010; s__uncultured bacterium
OTU_2226	1	0	0	0	0	1	1	0	0	0	0	0	0	0	0	0	0	0	k__Bacteria; p__Bacteroidetes; c__Bacteroidia; o__Bacteroidales; f__Rikenellaceae; g__Rikenella; s__uncultured bacterium
OTU_9532	1	2	0	0	0	0	0	0	1	0	0	0	1	0	0	0	0	0	k__Bacteria; p__Firmicutes; c__Clostridia; o__Clostridiales; f__Ruminococcaceae; g__Ruminococcaceae UCG-014
OTU_176	12	4	18	7	9	7	0	1	65	6	36	4	23	35	3	22	57	57	k__Bacteria; p__Firmicutes; c__Clostridia; o__Clostridiales; f__Ruminococcaceae; g__Ruminiclostridium 9; s__uncultured rumen bacterium
OTU_1524	8	12	27	8	3	6	15	20	11	29	15	11	16	10	34	24	3	2	k__Bacteria; p__Bacteroidetes; c__Bacteroidia; o__Bacteroidales; f__Prevotellaceae; g__Prevotella 7
OTU_10409	1	0	0	4	0	0	0	9	0	3	0	3	0	5	6	3	1	0	k__Bacteria; p__Bacteroidetes; c__Bacteroidia; o__Bacteroidales; f__Prevotellaceae; g__Prevotella 7; s__uncultured bacterium
OTU_80	146	166	282	145	263	144	181	146	809	142	322	81	96	490	199	459	720	693	k__Bacteria; p__Firmicutes; c__Clostridia; o__Clostridiales; f__Lachnospiraceae; g__[Ruminococcus] gauvreauii group; s__uncultured rumen bacterium
OTU_300	23	12	1	16	0	10	4	9	23	2	13	11	18	0	2	1	0	0	k__Bacteria; p__Firmicutes; c__Clostridia; o__Clostridiales; f__Ruminococcaceae; g__[Eubacterium] coprostanoligenes group
OTU_281	3	2	15	21	119	12	2	1	11	5	10	3	5	2	33	25	62	102	k__Bacteria; p__Bacteroidetes; c__Bacteroidia; o__Bacteroidales; f__Rikenellaceae; g__Rikenellaceae RC9 gut group; s__unidentified rumen bacterium RC16
OTU_27	172	141	194	137	93	514	270	423	211	136	192	141	207	113	271	292	707	177	k__Bacteria; p__Firmicutes; c__Negativicutes; o__Selenomonadales; f__Veillonellaceae; g__Dialister; s__uncultured bacterium
OTU_1611	2	1	0	2	0	0	0	1	0	0	0	1	1	0	0	0	0	0	k__Bacteria; p__Actinobacteria; c__Coriobacteriia; o__Coriobacteriales; f__Atopobiaceae; g__Olsenella; s__uncultured bacterium
OTU_1208	1	0	0	3	2	2	0	0	0	2	0	1	3	0	0	0	0	1	k__Bacteria; p__Firmicutes; c__Erysipelotrichia; o__Erysipelotrichales; f__Erysipelotrichaceae
OTU_160	128	121	87	104	152	95	57	32	102	79	124	84	85	51	81	49	78	57	k__Bacteria; p__Bacteroidetes; c__Bacteroidia; o__Bacteroidales; f__Prevotellaceae; g__Prevotella 1; s__uncultured rumen bacterium
OTU_748	13	14	5	11	9	7	2	7	4	13	3	4	9	10	13	6	6	1	k__Bacteria; p__Firmicutes; c__Clostridia; o__Clostridiales; f__Lachnospiraceae; g__Shuttleworthia
OTU_996	1	0	4	3	11	6	2	1	0	0	3	3	1	3	3	1	3	4	k__Bacteria; p__Firmicutes; c__Clostridia; o__Clostridiales; f__Christensenellaceae; g__Christensenellaceae R-7 group
OTU_1935	4	1	2	2	2	2	0	0	2	0	2	0	0	0	1	2	0	1	k__Bacteria; p__Tenericutes; c__Mollicutes; o__Mollicutes RF39; f__gut metagenome; g__gut metagenome; s__gut metagenome
OTU_719	5	1	6	1	11	3	8	5	2	6	8	4	6	0	6	4	4	2	k__Bacteria; p__Bacteroidetes; c__Bacteroidia; o__Bacteroidales; f__Muribaculaceae; g__uncultured rumen bacterium; s__uncultured rumen bacterium
OTU_912	10	4	4	16	5	4	0	1	14	0	3	12	7	1	0	0	0	0	k__Bacteria; p__Proteobacteria; c__Gammaproteobacteria; o__Aeromonadales; f__Succinivibrionaceae; g__Succinivibrio; s__uncultured bacterium
OTU_6882	1	2	0	0	0	2	2	1	2	3	0	2	0	7	7	1	4	0	k__Bacteria; p__Bacteroidetes; c__Bacteroidia; o__Bacteroidales; f__Prevotellaceae; g__Prevotella 7
OTU_2129	6	6	2	2	6	4	3	2	2	2	7	4	4	0	0	1	1	0	k__Bacteria; p__Bacteroidetes; c__Bacteroidia; o__Bacteroidales; f__Prevotellaceae; g__Prevotella 1; s__uncultured rumen bacterium
OTU_133	30	16	53	64	45	41	17	19	36	46	45	38	48	29	51	29	47	61	k__Bacteria; p__Firmicutes; c__Clostridia; o__Clostridiales; f__Lachnospiraceae; g__Lachnospiraceae XPB1014 group; s__uncultured bacterium
OTU_5921	5	0	3	1	0	0	1	1	4	4	2	1	1	0	1	5	3	0	k__Bacteria; p__Firmicutes; c__Clostridia; o__Clostridiales; f__Lachnospiraceae
OTU_2025	16	23	25	44	68	29	8	12	52	4	41	29	28	18	29	51	75	70	k__Bacteria; p__Firmicutes; c__Clostridia; o__Clostridiales; f__Christensenellaceae; g__Christensenellaceae R-7 group
OTU_2401	1	0	0	0	0	0	0	0	0	0	0	0	0	0	0	0	0	0	k__Bacteria; p__Firmicutes; c__Erysipelotrichia; o__Erysipelotrichales; f__Erysipelotrichaceae; g__Asteroleplasma; s__gut metagenome
OTU_466	27	10	76	21	18	15	15	58	10	40	28	34	32	23	38	68	27	2	k__Bacteria; p__Bacteroidetes; c__Bacteroidia; o__Bacteroidales; f__Prevotellaceae; g__Prevotellaceae YAB2003 group; s__uncultured rumen bacterium
OTU_11172	22	29	1	9	2	2	6	10	15	9	5	19	10	1	1	3	6	1	k__Bacteria; p__Firmicutes; c__Clostridia; o__Clostridiales; f__Lachnospiraceae; g__Syntrophococcus; s__uncultured bacterium
OTU_875	5	9	16	5	5	12	10	6	14	11	7	6	6	6	11	9	2	0	k__Bacteria; p__Bacteroidetes; c__Bacteroidia; o__Bacteroidales; f__Prevotellaceae; g__Prevotella 1
OTU_3831	2	5	0	0	0	0	0	0	0	0	0	0	0	0	0	0	0	1	k__Bacteria; p__Firmicutes; c__Clostridia; o__Clostridiales; f__Ruminococcaceae; g__Ruminococcaceae NK4A214 group
OTU_1322	1	2	0	0	2	1	3	1	0	0	1	3	2	0	0	0	1	0	k__Bacteria; p__Bacteroidetes; c__Bacteroidia; o__Bacteroidales; f__Prevotellaceae; g__Prevotella 1
OTU_3867	0	1	10	15	3	3	2	7	0	3	7	3	14	3	5	0	0	1	k__Bacteria; p__Bacteroidetes; c__Bacteroidia; o__Bacteroidales; f__Muribaculaceae; g__uncultured rumen bacterium; s__uncultured rumen bacterium
OTU_89	33	44	22	84	5	68	35	36	119	31	49	27	52	7	19	36	17	23	k__Bacteria; p__Actinobacteria; c__Coriobacteriia; o__Coriobacteriales; f__Atopobiaceae; g__Olsenella; s__uncultured bacterium
OTU_550	27	4	39	14	4	28	5	6	14	11	19	6	18	8	5	6	15	8	k__Bacteria; p__Fibrobacteres; c__Fibrobacteria; o__Fibrobacterales; f__Fibrobacteraceae; g__Fibrobacter; s__Fibrobacter succinogenes subsp. succinogenes S85
OTU_993	3	2	2	2	0	8	5	5	0	4	1	3	3	0	4	9	4	0	k__Bacteria; p__Firmicutes; c__Negativicutes; o__Selenomonadales
OTU_5249	5	9	7	4	1	4	9	23	8	16	7	11	2	16	18	9	2	1	k__Bacteria; p__Bacteroidetes; c__Bacteroidia; o__Bacteroidales; f__Prevotellaceae; g__Prevotella 7
OTU_138	48	113	156	240	236	185	114	83	149	123	280	129	259	270	229	162	247	463	k__Bacteria; p__Firmicutes; c__Clostridia; o__Clostridiales
OTU_987	10	5	7	6	4	6	5	3	1	1	8	10	8	0	2	0	2	3	k__Bacteria; p__Tenericutes; c__Mollicutes; o__Mollicutes RF39
OTU_842	4	9	5	5	15	4	3	4	30	0	6	3	6	1	3	9	9	8	k__Bacteria; p__Firmicutes; c__Clostridia; o__Clostridiales; f__Christensenellaceae; g__Christensenellaceae R-7 group; s__uncultured prokaryote
OTU_596	5	0	4	4	8	5	6	2	15	2	10	3	7	11	12	10	4	15	k__Bacteria; p__Firmicutes; c__Clostridia; o__Clostridiales; f__Lachnospiraceae
OTU_1087	1	3	1	4	3	4	1	8	1	1	8	0	0	0	12	3	2	4	k__Bacteria; p__Bacteroidetes; c__Bacteroidia; o__Bacteroidales; f__F082; g__uncultured rumen bacterium; s__uncultured rumen bacterium
OTU_4729	2	0	1	0	2	5	4	4	5	2	4	0	3	5	0	3	3	12	k__Bacteria; p__Firmicutes; c__Clostridia; o__Clostridiales; f__Ruminococcaceae; g__Ruminococcaceae UCG-011; s__uncultured rumen bacterium
OTU_8422	1	9	0	0	0	0	0	0	1	0	0	5	0	0	0	0	0	0	k__Bacteria; p__Firmicutes; c__Clostridia; o__Clostridiales; f__Ruminococcaceae
OTU_627	2	4	9	7	11	4	0	5	6	1	7	6	13	10	3	6	12	22	k__Bacteria; p__Firmicutes; c__Clostridia; o__Clostridiales; f__Lachnospiraceae
OTU_321	27	26	24	31	47	43	22	14	37	9	38	28	58	23	24	18	25	29	k__Bacteria; p__Patescibacteria; c__Saccharimonadia; o__Saccharimonadales; f__Saccharimonadaceae; g__Candidatus Saccharimonas; s__uncultured rumen bacterium
OTU_330	18	2	4	37	8	9	26	5	2	4	20	13	2	6	12	5	20	2	k__Bacteria; p__Firmicutes; c__Clostridia; o__Clostridiales; f__Ruminococcaceae; g__Ruminococcaceae UCG-014
OTU_348	15	35	44	25	60	62	32	11	33	19	36	18	33	60	63	38	86	47	k__Bacteria; p__Bacteroidetes; c__Bacteroidia; o__Bacteroidales; f__Prevotellaceae; g__Prevotella 1; s__uncultured bacterium
OTU_525	6	9	11	2	1	15	24	8	4	5	7	4	8	12	17	12	11	14	k__Bacteria; p__Firmicutes; c__Clostridia; o__Clostridiales; f__Ruminococcaceae; g__Faecalibacterium; s__uncultured bacterium
OTU_180	12	8	14	12	0	11	15	20	15	14	9	20	21	11	26	19	22	5	k__Bacteria; p__Bacteroidetes; c__Bacteroidia; o__Bacteroidales
OTU_810	2	1	1	4	6	3	4	2	6	2	2	3	1	0	4	0	0	4	k__Bacteria; p__Tenericutes; c__Mollicutes; o__Mollicutes RF39
OTU_498	2	0	0	9	0	5	5	5	10	4	0	2	3	1	4	1	0	0	k__Bacteria; p__Firmicutes; c__Erysipelotrichia; o__Erysipelotrichales; f__Erysipelotrichaceae; g__Erysipelotrichaceae UCG-004
OTU_83	41	17	106	108	37	48	11	38	20	46	44	24	80	86	70	64	107	70	k__Bacteria; p__Firmicutes; c__Clostridia; o__Clostridiales; f__Lachnospiraceae
OTU_153	3	23	12	36	22	35	27	4	34	22	41	21	32	97	39	36	42	33	k__Bacteria; p__Bacteroidetes; c__Bacteroidia; o__Bacteroidales; f__Rikenellaceae; g__Rikenellaceae RC9 gut group; s__uncultured rumen bacterium
OTU_487	4	2	5	10	4	5	1	4	9	2	3	4	2	4	1	6	3	1	k__Bacteria; p__Firmicutes; c__Erysipelotrichia; o__Erysipelotrichales; f__Erysipelotrichaceae; g__Asteroleplasma; s__uncultured rumen bacterium
OTU_174	31	38	81	45	77	21	20	17	50	12	88	26	83	23	60	86	71	268	k__Bacteria; p__Firmicutes; c__Clostridia; o__Clostridiales; f__Ruminococcaceae; g__Ruminococcus 2
OTU_537	1	5	3	4	1	0	3	2	3	6	2	5	5	6	11	6	8	6	k__Bacteria; p__Firmicutes; c__Erysipelotrichia; o__Erysipelotrichales; f__Erysipelotrichaceae; g__Erysipelotrichaceae UCG-009; s__uncultured rumen bacterium
OTU_1774	14	4	17	19	0	6	4	0	4	0	5	6	3	1	9	9	7	9	k__Bacteria; p__Patescibacteria; c__Saccharimonadia; o__Saccharimonadales; f__Saccharimonadaceae; g__Candidatus Saccharimonas; s__uncultured rumen bacterium
OTU_350	15	17	14	9	0	5	3	11	12	15	6	6	22	7	7	1	14	9	k__Bacteria; p__Bacteroidetes; c__Bacteroidia; o__Bacteroidales; f__Prevotellaceae; g__Prevotellaceae UCG-004; s__uncultured rumen bacterium
OTU_1383	22	17	22	28	21	41	17	19	24	28	28	12	17	32	9	8	9	10	k__Bacteria; p__Firmicutes; c__Clostridia; o__Clostridiales; f__Lachnospiraceae; g__[Eubacterium] ruminantium group
OTU_583	7	3	47	13	4	17	6	10	3	17	24	17	4	19	20	13	6	2	k__Bacteria; p__Bacteroidetes; c__Bacteroidia; o__Bacteroidales; f__Prevotellaceae; g__Prevotella 1
OTU_2517	2	1	0	1	0	0	0	1	0	0	0	1	1	0	0	0	0	0	k__Bacteria; p__Firmicutes; c__Clostridia; o__Clostridiales; f__Lachnospiraceae; g__Syntrophococcus
OTU_182	17	0	0	0	0	0	0	0	0	0	0	0	0	2	0	0	0	0	k__Bacteria; p__Firmicutes; c__Clostridia; o__Clostridiales; f__Ruminococcaceae; g__Ruminococcaceae NK4A214 group
OTU_3984	0	0	0	0	2	0	0	0	0	0	0	1	0	0	0	0	0	0	k__Bacteria; p__Bacteroidetes; c__Bacteroidia; o__Bacteroidales; f__Prevotellaceae
OTU_2086	7	48	33	13	22	14	15	7	8	19	20	16	10	13	19	14	20	9	k__Bacteria; p__Bacteroidetes; c__Bacteroidia; o__Bacteroidales; f__Prevotellaceae; g__Prevotella 1
OTU_771	19	9	0	0	0	0	11	20	0	12	2	31	1	1	0	0	0	0	k__Bacteria; p__Firmicutes; c__Clostridia; o__Clostridiales; f__Lachnospiraceae
OTU_8971	8	8	0	1	1	0	2	7	5	6	0	5	3	0	1	0	0	0	k__Bacteria; p__Firmicutes; c__Clostridia; o__Clostridiales; f__Lachnospiraceae
OTU_289	9	5	6	7	8	2	4	4	6	2	1	8	15	1	2	0	4	3	k__Bacteria; p__Proteobacteria; c__Gammaproteobacteria; o__Enterobacteriales; f__Enterobacteriaceae; g__Escherichia-Shigella; s__Escherichia coli
OTU_132	12	4	45	35	112	38	15	10	56	18	21	8	38	36	39	42	90	139	k__Bacteria; p__Bacteroidetes; c__Bacteroidia; o__Bacteroidales; f__Rikenellaceae; g__Rikenellaceae RC9 gut group; s__uncultured rumen bacterium
OTU_638	23	22	14	13	5	21	8	12	3	3	13	5	27	1	3	1	5	0	k__Bacteria; p__Bacteroidetes; c__Bacteroidia; o__Bacteroidales; f__Prevotellaceae
OTU_100	19	13	30	49	66	41	10	20	69	14	40	21	35	44	23	55	61	141	k__Bacteria; p__Firmicutes; c__Clostridia; o__Clostridiales; f__Christensenellaceae; g__Christensenellaceae R-7 group
OTU_514	5	3	11	12	8	9	3	7	7	6	6	7	13	3	7	9	6	8	k__Bacteria; p__Firmicutes; c__Clostridia; o__Clostridiales; f__Lachnospiraceae; g__Lachnospiraceae NK3A20 group; s__uncultured rumen bacterium
OTU_1257	18	3	16	14	30	18	3	11	4	13	35	12	48	25	24	15	56	13	k__Bacteria; p__Bacteroidetes; c__Bacteroidia; o__Bacteroidales; f__Prevotellaceae; g__Prevotella 1; s__uncultured rumen bacterium
OTU_620	22	30	26	24	20	30	19	11	33	7	36	12	43	16	6	8	15	11	k__Bacteria; p__Bacteroidetes; c__Bacteroidia; o__Bacteroidales; f__Prevotellaceae; g__Prevotellaceae UCG-003; s__uncultured rumen bacterium
OTU_242	21	17	21	15	14	29	20	5	14	6	11	13	9	21	14	12	21	29	k__Bacteria; p__Bacteroidetes; c__Bacteroidia; o__Bacteroidales; f__Rikenellaceae; g__U29-B03; s__uncultured rumen bacterium
OTU_279	11	3	14	15	18	41	18	4	9	9	6	6	16	15	11	22	0	12	k__Bacteria; p__Bacteroidetes; c__Bacteroidia; o__Bacteroidales; f__Rikenellaceae; g__Rikenellaceae RC9 gut group; s__uncultured bacterium
OTU_2119	6	0	0	0	0	0	0	0	0	0	0	0	0	0	0	0	0	0	k__Bacteria; p__Bacteroidetes; c__Bacteroidia; o__Bacteroidales; f__Prevotellaceae
OTU_95	38	30	7	24	0	18	24	11	43	30	28	29	46	1	13	9	7	35	k__Bacteria; p__Firmicutes; c__Erysipelotrichia; o__Erysipelotrichales; f__Erysipelotrichaceae; g__Erysipelotrichaceae UCG-006; s__uncultured bacterium
OTU_171	25	36	27	51	30	33	22	35	68	28	43	41	39	51	46	27	42	61	k__Bacteria; p__Firmicutes; c__Clostridia; o__Clostridiales; f__Lachnospiraceae; g__Oribacterium; s__uncultured rumen bacterium
OTU_170	16	27	31	45	30	30	17	18	54	17	20	23	10	33	11	7	20	13	k__Bacteria; p__Firmicutes; c__Clostridia; o__Clostridiales; f__Lachnospiraceae; g__[Eubacterium] ruminantium group; s__bacterium YSB2008
OTU_580	6	2	0	5	0	2	1	4	4	3	0	4	3	0	3	0	1	3	k__Bacteria; p__Firmicutes; c__Erysipelotrichia; o__Erysipelotrichales; f__Erysipelotrichaceae; g__Asteroleplasma
OTU_131	28	5	169	40	242	61	89	51	30	128	127	35	44	76	125	94	58	97	k__Bacteria; p__Firmicutes; c__Clostridia; o__Clostridiales; f__Ruminococcaceae; g__Ruminococcaceae UCG-002; s__uncultured bacterium
OTU_299	19	35	21	19	0	6	8	24	16	15	25	23	17	13	10	5	0	3	k__Bacteria; p__Firmicutes; c__Clostridia; o__Clostridiales; f__Lachnospiraceae; g__Coprococcus 1; s__uncultured rumen bacterium
OTU_257	10	18	131	7	45	103	1	5	22	11	81	7	49	6	14	7	5	16	k__Bacteria; p__Bacteroidetes; c__Bacteroidia; o__Bacteroidales; f__Prevotellaceae; g__Prevotellaceae Ga6A1 group; s__uncultured rumen bacterium
OTU_7	41	3	308	226	192	239	130	146	819	89	295	60	573	68	107	248	630	728	k__Bacteria; p__Firmicutes; c__Clostridia; o__Clostridiales; f__Ruminococcaceae; g__[Eubacterium] coprostanoligenes group; s__uncultured bacterium
OTU_290	18	18	19	24	30	28	4	10	25	17	36	7	14	63	26	32	32	79	k__Bacteria; p__Firmicutes; c__Clostridia; o__Clostridiales; f__Family XIII; g__[Eubacterium] nodatum group; s__bacterium XBB3003
OTU_2948	1	0	1	0	0	0	0	0	0	0	0	0	0	0	0	0	0	0	k__Bacteria; p__Deinococcus-Thermus; c__Deinococci; o__Deinococcales; f__Trueperaceae; g__Truepera; s__uncultured Thermus/Deinococcus group bacterium
OTU_8272	1	1	2	1	0	2	1	1	0	0	0	1	2	4	1	0	2	0	k__Bacteria; p__Firmicutes; c__Clostridia; o__Clostridiales
OTU_128	39	44	39	77	54	19	66	40	25	15	57	42	37	18	48	60	39	67	k__Bacteria; p__Patescibacteria; c__Saccharimonadia; o__Saccharimonadales; f__Saccharimonadaceae; g__Candidatus Saccharimonas; s__uncultured rumen bacterium
OTU_417	24	22	6	17	15	4	1	3	5	6	6	15	9	4	3	15	6	22	k__Bacteria; p__Firmicutes; c__Clostridia; o__Clostridiales; f__Ruminococcaceae; g__Ruminococcaceae UCG-014; s__uncultured bacterium
OTU_1895	14	30	17	59	92	52	42	17	8	42	27	17	18	20	51	42	39	62	k__Bacteria; p__Firmicutes; c__Clostridia; o__Clostridiales; f__Ruminococcaceae; g__Ruminococcaceae UCG-005; s__uncultured rumen bacterium
OTU_1364	3	0	1	0	6	0	0	0	0	0	1	1	0	0	1	3	5	4	k__Bacteria; p__Firmicutes; c__Clostridia; o__Clostridiales; f__Family XIII; g__[Eubacterium] brachy group
OTU_3440	2	0	1	2	0	0	0	3	2	1	2	2	1	0	0	3	1	0	k__Bacteria; p__Firmicutes; c__Clostridia; o__Clostridiales; f__Lachnospiraceae
OTU_2193	11	8	7	23	14	15	10	5	46	9	14	14	22	6	7	9	7	12	k__Bacteria; p__Firmicutes; c__Clostridia; o__Clostridiales; f__Ruminococcaceae; g__Saccharofermentans; s__uncultured rumen bacterium
OTU_10017	0	2	0	0	0	0	0	0	0	1	1	0	0	0	1	1	0	0	k__Bacteria; p__Firmicutes; c__Clostridia; o__Clostridiales; f__Lachnospiraceae
OTU_154	17	59	32	48	32	24	19	11	15	14	19	18	42	14	24	10	16	12	k__Bacteria; p__Bacteroidetes; c__Bacteroidia; o__Bacteroidales; f__Prevotellaceae
OTU_2243	20	21	11	11	8	21	36	51	42	52	12	75	12	18	30	14	15	1	k__Bacteria; p__Bacteroidetes; c__Bacteroidia; o__Bacteroidales; f__Prevotellaceae; g__Prevotella 7; s__uncultured bacterium
OTU_686	6	7	3	16	7	12	7	3	5	8	11	7	7	5	5	7	5	7	k__Bacteria; p__Firmicutes; c__Clostridia; o__Clostridiales; f__Family XIII; g__[Eubacterium] nodatum group; s__uncultured rumen bacterium
OTU_4107	0	0	4	2	2	4	0	0	0	2	2	2	1	0	0	0	0	0	k__Bacteria; p__Firmicutes; c__Clostridia; o__Clostridiales; f__Ruminococcaceae; g__Ruminococcaceae UCG-001; s__uncultured bacterium
OTU_2369	9	11	12	23	16	37	9	24	6	30	15	22	15	20	8	4	4	2	k__Bacteria; p__Firmicutes; c__Clostridia; o__Clostridiales; f__Ruminococcaceae; g__Ruminococcus 1
OTU_311	22	51	11	26	36	45	19	10	15	42	31	17	53	4	23	9	14	1	k__Bacteria; p__Bacteroidetes; c__Bacteroidia; o__Bacteroidales; f__Muribaculaceae; g__uncultured rumen bacterium; s__uncultured rumen bacterium
OTU_566	5	0	5	6	3	5	5	2	9	2	2	2	9	0	3	0	0	1	k__Bacteria; p__Firmicutes; c__Erysipelotrichia; o__Erysipelotrichales; f__Erysipelotrichaceae; g__Erysipelotrichaceae UCG-004; s__uncultured bacterium
OTU_347	16	7	4	9	23	31	12	6	11	11	11	0	6	60	18	13	14	21	k__Bacteria; p__Bacteroidetes; c__Bacteroidia; o__Bacteroidales; f__Rikenellaceae; g__Rikenellaceae RC9 gut group; s__unidentified rumen bacterium RF14
OTU_1467	2	0	0	0	4	0	1	1	0	0	0	0	3	1	1	1	0	1	k__Bacteria; p__Firmicutes; c__Erysipelotrichia; o__Erysipelotrichales; f__Erysipelotrichaceae; g__uncultured; s__uncultured rumen bacterium
OTU_296	11	20	9	31	15	16	8	6	12	8	17	10	13	0	15	6	9	3	k__Bacteria; p__Firmicutes; c__Clostridia; o__Clostridiales; f__Lachnospiraceae; g__Lachnospiraceae NK3A20 group; s__uncultured rumen bacterium
OTU_1591	1	0	0	0	0	0	1	0	0	0	1	0	0	0	1	0	0	0	k__Bacteria; p__Firmicutes; c__Erysipelotrichia; o__Erysipelotrichales; f__Erysipelotrichaceae; g__Solobacterium
OTU_2249	0	2	0	4	2	0	0	0	0	2	0	0	0	0	0	1	0	1	k__Bacteria; p__Firmicutes; c__Clostridia; o__Clostridiales; f__Lachnospiraceae; g__Butyrivibrio 2; s__uncultured rumen bacterium
OTU_1703	3	1	0	2	2	1	0	0	2	2	1	1	7	1	3	2	1	1	k__Bacteria; p__Spirochaetes; c__Spirochaetia; o__Spirochaetales; f__Spirochaetaceae; g__Treponema 2
OTU_1602	14	32	7	19	4	13	32	16	20	31	5	36	6	7	12	7	26	4	k__Bacteria; p__Firmicutes; c__Clostridia; o__Clostridiales; f__Ruminococcaceae; g__Ruminococcaceae UCG-014; s__uncultured bacterium
OTU_435	6	7	7	5	12	6	6	8	4	5	9	6	3	6	5	12	9	14	k__Bacteria; p__Firmicutes; c__Clostridia; o__Clostridiales; f__Christensenellaceae; g__uncultured; s__uncultured rumen bacterium
OTU_278	11	12	0	14	0	1	15	13	23	8	12	17	14	0	1	3	0	0	k__Bacteria; p__Actinobacteria; c__Coriobacteriia; o__Coriobacteriales; f__Atopobiaceae; g__Olsenella; s__uncultured bacterium
OTU_773	1	2	5	2	0	2	2	3	1	1	1	4	1	0	1	8	8	3	k__Bacteria; p__Firmicutes; c__Bacilli; o__Lactobacillales; f__Lactobacillaceae; g__Lactobacillus; s__Lactobacillus murinus
OTU_164	12	23	42	18	72	27	22	58	9	13	10	67	18	27	48	31	43	9	k__Bacteria; p__Bacteroidetes; c__Bacteroidia; o__Bacteroidales; f__Prevotellaceae; g__Prevotella 1; s__Prevotella bryantii
OTU_2393	9	4	3	3	2	2	0	3	0	8	5	5	13	10	6	6	2	0	k__Bacteria; p__Firmicutes; c__Clostridia; o__Clostridiales; f__Ruminococcaceae; g__Ruminococcaceae UCG-014; s__uncultured rumen bacterium
OTU_9697	3	4	0	0	0	0	1	8	0	4	0	5	0	0	1	1	1	0	k__Bacteria; p__Firmicutes; c__Clostridia; o__Clostridiales; f__Lachnospiraceae
OTU_293	14	1	3	7	8	14	7	6	16	2	8	0	11	3	2	3	6	8	k__Bacteria; p__Bacteroidetes; c__Bacteroidia; o__Bacteroidales
OTU_390	6	3	6	10	11	10	5	1	30	4	12	6	14	16	4	16	14	17	k__Bacteria; p__Firmicutes; c__Clostridia; o__Clostridiales; f__Ruminococcaceae; g__Ruminococcaceae NK4A214 group; s__uncultured rumen bacterium
OTU_197	13	3	4	5	0	0	1	1	0	0	1	8	1	1	3	4	3	1	k__Bacteria; p__Firmicutes; c__Clostridia; o__Clostridiales; f__Lachnospiraceae; g__Agathobacter; s__uncultured bacterium
OTU_683	6	7	30	13	15	8	8	3	8	13	15	13	8	5	7	15	2	1	k__Bacteria; p__Bacteroidetes; c__Bacteroidia; o__Bacteroidales; f__Prevotellaceae; g__Prevotella 1; s__uncultured rumen bacterium
OTU_8813	6	1	0	0	0	0	0	0	0	4	0	5	1	0	0	0	0	0	k__Bacteria; p__Firmicutes; c__Negativicutes; o__Selenomonadales; f__Veillonellaceae; g__Dialister
OTU_3649	7	1	10	11	1	11	12	66	3	50	9	29	7	12	47	12	7	0	k__Bacteria; p__Bacteroidetes; c__Bacteroidia; o__Bacteroidales; f__Prevotellaceae; g__Prevotella 7; s__uncultured bacterium
OTU_6515	1	0	0	0	0	0	2	0	0	0	0	4	0	0	0	0	0	0	k__Bacteria; p__Bacteroidetes; c__Bacteroidia; o__Bacteroidales; f__Prevotellaceae; g__Prevotella 7; s__uncultured bacterium
OTU_407	4	18	22	15	24	10	17	11	6	3	35	17	8	18	30	30	28	79	k__Bacteria; p__Firmicutes; c__Clostridia; o__Clostridiales; f__Ruminococcaceae; g__Ruminococcus 2; s__uncultured rumen bacterium
OTU_1142	5	4	0	2	3	0	2	1	2	3	0	0	0	1	0	0	3	1	k__Bacteria; p__Firmicutes; c__Bacilli; o__Bacillales; f__Staphylococcaceae; g__Staphylococcus
OTU_647	5	3	5	7	3	7	3	1	7	1	7	6	10	1	4	2	1	7	k__Bacteria; p__Firmicutes; c__Clostridia; o__Clostridiales; f__Lachnospiraceae; g__Lachnospiraceae NK3A20 group; s__uncultured rumen bacterium
OTU_438	16	13	0	6	0	0	1	4	36	18	0	6	24	0	0	0	0	0	k__Bacteria; p__Firmicutes; c__Clostridia; o__Clostridiales; f__Defluviitaleaceae; g__Defluviitaleaceae UCG-011; s__uncultured rumen bacterium
OTU_1062	10	4	6	0	0	11	5	14	3	6	8	3	3	1	2	0	0	0	k__Bacteria; p__Proteobacteria; c__Gammaproteobacteria; o__Betaproteobacteriales; f__Burkholderiaceae; g__Sutterella; s__gut metagenome
OTU_181	22	24	57	73	78	106	42	50	36	88	48	75	62	40	16	15	9	6	k__Bacteria; p__Firmicutes; c__Clostridia; o__Clostridiales; f__Ruminococcaceae; g__Ruminococcus 1
OTU_1373	1	1	0	1	1	0	2	1	0	0	0	1	0	1	2	0	3	0	k__Bacteria; p__Firmicutes; c__Clostridia; o__Clostridiales; f__Ruminococcaceae; g__[Eubacterium] coprostanoligenes group
OTU_246	38	42	57	43	68	22	71	27	25	22	80	25	43	17	30	50	31	58	k__Bacteria; p__Firmicutes; c__Clostridia; o__Clostridiales; f__Ruminococcaceae; g__Ruminococcaceae UCG-001; s__uncultured bacterium
OTU_868	2	8	7	3	10	6	11	9	8	4	19	6	13	26	3	16	11	9	k__Bacteria; p__Firmicutes; c__Clostridia; o__Clostridiales; f__Ruminococcaceae; g__[Eubacterium] coprostanoligenes group; s__uncultured bacterium
OTU_1117	7	1	3	7	0	4	0	1	0	1	6	1	1	1	2	0	2	0	k__Bacteria; p__Tenericutes; c__Mollicutes; o__Mollicutes RF39; f__uncultured rumen bacterium; g__uncultured rumen bacterium; s__uncultured rumen bacterium
OTU_426	10	0	7	13	11	13	4	6	19	8	16	5	11	0	3	0	0	1	k__Bacteria; p__Firmicutes; c__Clostridia; o__Clostridiales; f__Ruminococcaceae; g__Saccharofermentans; s__uncultured bacterium
OTU_7855	14	4	0	4	1	0	4	11	4	11	6	2	5	0	5	4	5	1	k__Bacteria; p__Firmicutes; c__Clostridia; o__Clostridiales; f__Lachnospiraceae
OTU_1378	10	4	5	9	4	4	0	6	3	6	8	5	3	0	2	5	4	3	k__Bacteria; p__Tenericutes; c__Mollicutes; o__Mollicutes RF39; f__uncultured bacterium; g__uncultured bacterium; s__uncultured bacterium
OTU_169	13	18	21	31	24	63	7	9	32	18	37	8	21	9	32	20	46	21	k__Bacteria; p__Bacteroidetes; c__Bacteroidia; o__Bacteroidales; f__Prevotellaceae; g__Prevotella 1; s__uncultured rumen bacterium
OTU_269	21	83	27	44	20	43	39	48	38	40	48	48	87	24	14	7	33	5	k__Bacteria; p__Firmicutes; c__Clostridia; o__Clostridiales; f__Ruminococcaceae; g__Ruminococcus 1
OTU_9825	11	2	0	0	0	0	0	1	1	4	0	2	0	0	0	1	1	0	k__Bacteria; p__Firmicutes; c__Clostridia; o__Clostridiales; f__Lachnospiraceae; g__[Eubacterium] eligens group
OTU_431	62	58	24	36	20	25	31	24	26	41	31	43	21	28	23	16	3	14	k__Bacteria; p__Bacteroidetes; c__Bacteroidia; o__Bacteroidales; f__Prevotellaceae; g__Prevotella 1; s__uncultured rumen bacterium
OTU_2496	4	1	5	0	0	1	0	0	2	5	0	0	0	1	0	2	0	0	k__Bacteria; p__Bacteroidetes; c__Bacteroidia; o__Bacteroidales; f__Prevotellaceae; g__Prevotella 1
OTU_9495	0	2	0	1	0	0	0	0	0	0	0	0	0	0	0	0	0	1	k__Bacteria; p__Firmicutes; c__Clostridia; o__Clostridiales; f__Lachnospiraceae; g__Acetitomaculum
OTU_211	24	73	48	65	74	33	98	58	31	52	113	72	27	12	70	44	43	11	k__Bacteria; p__Bacteroidetes; c__Bacteroidia; o__Bacteroidales; f__Prevotellaceae; g__Prevotella 1; s__uncultured rumen bacterium
OTU_395	7	4	7	10	14	16	5	6	12	6	9	3	9	11	11	3	11	17	k__Bacteria; p__Firmicutes; c__Clostridia; o__Clostridiales; f__Defluviitaleaceae; g__Defluviitaleaceae UCG-011; s__uncultured rumen bacterium
OTU_114	15	23	21	50	62	86	49	32	27	14	39	16	29	34	22	19	59	18	k__Bacteria; p__Bacteroidetes; c__Bacteroidia; o__Bacteroidales; f__Prevotellaceae; g__uncultured bacterium; s__uncultured bacterium
OTU_538	16	12	2	7	2	6	6	6	3	2	4	6	4	0	2	4	0	2	k__Bacteria; p__Actinobacteria; c__Coriobacteriia; o__Coriobacteriales; f__Atopobiaceae; g__Olsenella; s__bacterium OL-1
OTU_829	3	2	14	9	0	7	2	4	0	3	7	0	3	1	1	1	5	1	k__Bacteria; p__Firmicutes; c__Clostridia; o__Clostridiales; f__Lachnospiraceae; g__Catonella
OTU_1388	5	1	5	8	0	2	2	4	0	1	5	2	0	0	2	2	0	0	k__Bacteria; p__Tenericutes; c__Mollicutes; o__Mollicutes RF39
OTU_9490	0	2	0	0	0	0	0	0	0	2	2	0	0	0	0	0	0	0	k__Bacteria; p__Firmicutes; c__Clostridia; o__Clostridiales; f__Lachnospiraceae
OTU_135	21	25	24	50	46	38	10	11	20	16	32	9	38	37	18	21	22	25	k__Bacteria; p__Bacteroidetes; c__Bacteroidia; o__Bacteroidales; f__Prevotellaceae; g__Prevotellaceae UCG-003; s__uncultured rumen bacterium
OTU_6375	2	0	5	3	2	1	0	0	6	4	16	2	4	13	2	3	3	10	k__Bacteria; p__Firmicutes; c__Clostridia; o__Clostridiales; f__Ruminococcaceae; g__Ruminococcaceae NK4A214 group
OTU_497	4	1	2	16	1	46	6	11	4	2	4	13	22	0	0	1	1	1	k__Bacteria; p__Firmicutes; c__Clostridia; o__Clostridiales; f__Ruminococcaceae; g__Ruminococcus 1; s__uncultured rumen bacterium
OTU_823	2	3	2	6	2	1	1	6	12	0	7	4	1	1	1	0	3	3	k__Bacteria; p__Tenericutes; c__Mollicutes; o__Mollicutes RF39
OTU_2121	12	21	1	13	0	5	19	9	22	17	3	11	2	9	0	3	2	12	k__Bacteria; p__Firmicutes; c__Clostridia; o__Clostridiales; f__Ruminococcaceae; g__Ruminococcaceae UCG-014
OTU_399	6	7	9	9	8	4	7	3	12	4	6	10	22	6	6	4	28	33	k__Bacteria; p__Firmicutes; c__Clostridia; o__Clostridiales; f__Lachnospiraceae
OTU_9628	9	25	0	0	0	0	2	2	0	6	0	12	3	0	0	1	0	0	k__Bacteria; p__Firmicutes; c__Clostridia; o__Clostridiales; f__Ruminococcaceae; g__Ruminococcaceae UCG-014
OTU_304	1	10	22	9	13	8	7	8	7	8	28	3	10	21	20	31	16	5	k__Bacteria; p__Bacteroidetes; c__Bacteroidia; o__Bacteroidales; f__Prevotellaceae; g__Prevotella 1; s__uncultured bacterium
OTU_386	9	29	19	22	15	16	23	4	4	12	13	9	28	4	10	8	4	4	k__Bacteria; p__Bacteroidetes; c__Bacteroidia; o__Bacteroidales; f__Muribaculaceae; g__uncultured rumen bacterium; s__uncultured rumen bacterium
OTU_671	12	1	5	2	1	1	1	5	38	5	4	1	1	0	0	2	0	4	k__Bacteria; p__Firmicutes; c__Erysipelotrichia; o__Erysipelotrichales; f__Erysipelotrichaceae; g__Kandleria; s__Kandleria vitulina
OTU_111	27	36	18	85	13	38	23	5	40	20	12	12	23	16	17	19	18	23	k__Bacteria; p__Firmicutes; c__Erysipelotrichia; o__Erysipelotrichales; f__Erysipelotrichaceae; g__Erysipelotrichaceae UCG-004; s__uncultured rumen bacterium
OTU_1962	12	5	3	7	4	1	1	5	0	9	2	7	7	7	3	9	3	0	k__Bacteria; p__Firmicutes; c__Clostridia; o__Clostridiales; f__Ruminococcaceae; g__Ruminococcaceae UCG-014
OTU_2527	6	2	0	2	0	2	4	5	1	2	0	2	3	0	0	2	0	0	k__Bacteria; p__Firmicutes; c__Clostridia; o__Clostridiales
OTU_2023	2	4	4	3	1	3	8	2	4	23	11	4	2	5	4	8	6	2	k__Bacteria; p__Firmicutes; c__Clostridia; o__Clostridiales; f__Family XIII; g__Family XIII AD3011 group; s__bacterium YSD2010
OTU_303	2	5	12	5	26	4	7	11	13	6	28	6	21	7	6	9	23	36	k__Bacteria; p__Firmicutes; c__Clostridia; o__Clostridiales; f__Lachnospiraceae
OTU_322	27	23	28	16	18	27	21	15	9	36	24	14	3	24	20	6	10	1	k__Bacteria; p__Bacteroidetes; c__Bacteroidia; o__Bacteroidales; f__Muribaculaceae; g__uncultured rumen bacterium; s__uncultured rumen bacterium
OTU_1413	4	5	1	9	3	7	3	6	2	6	1	10	7	0	3	0	3	0	k__Bacteria; p__Firmicutes; c__Clostridia; o__Clostridiales; f__Lachnospiraceae
OTU_115	6	9	44	62	52	13	11	50	52	19	30	28	42	41	13	12	43	19	k__Bacteria; p__Firmicutes; c__Clostridia; o__Clostridiales; f__Ruminococcaceae; g__Ruminiclostridium 9; s__Clostridiales bacterium NK3B98
OTU_421	9	1	23	3	52	6	2	0	2	3	68	6	12	16	10	18	10	42	k__Bacteria; p__Firmicutes; c__Clostridia; o__Clostridiales; f__Ruminococcaceae; g__Ruminococcaceae UCG-001
OTU_42	62	9	143	92	64	154	1162	439	12	402	123	275	197	20	259	286	4	1	k__Bacteria; p__Bacteroidetes; c__Bacteroidia; o__Bacteroidales; f__Muribaculaceae; g__uncultured rumen bacterium; s__uncultured rumen bacterium
OTU_318	14	22	15	15	10	12	5	6	34	16	20	10	24	6	8	13	22	24	k__Bacteria; p__Firmicutes; c__Clostridia; o__Clostridiales; f__Lachnospiraceae; g__Lachnospiraceae UCG-008; s__uncultured Lachnospiraceae bacterium
OTU_751	2	1	2	17	7	13	1	3	0	6	6	3	4	2	8	1	0	6	k__Bacteria; p__Firmicutes; c__Clostridia; o__Clostridiales; f__Lachnospiraceae; g__[Eubacterium] ventriosum group
OTU_255	20	12	20	21	42	15	16	13	25	13	32	11	8	16	25	22	12	12	k__Bacteria; p__Firmicutes; c__Clostridia; o__Clostridiales; f__Family XIII; g__Anaerovorax; s__uncultured rumen bacterium
OTU_185	21	31	66	27	24	32	36	40	25	29	39	33	39	30	41	26	16	11	k__Bacteria; p__Bacteroidetes; c__Bacteroidia; o__Bacteroidales; f__Prevotellaceae; g__Prevotella 1; s__unidentified rumen bacterium 12-12
OTU_118	20	45	25	33	60	31	26	6	28	20	35	9	33	30	40	26	38	37	k__Bacteria; p__Bacteroidetes; c__Bacteroidia; o__Bacteroidales; f__Rikenellaceae; g__Rikenellaceae RC9 gut group
OTU_389	8	11	26	5	28	7	3	5	3	12	11	4	3	13	17	14	6	9	k__Bacteria; p__Firmicutes; c__Clostridia; o__Clostridiales; f__Lachnospiraceae
OTU_920	3	6	17	28	8	13	1	3	17	5	10	6	7	1	3	1	6	20	k__Bacteria; p__Spirochaetes; c__Spirochaetia; o__Spirochaetales; f__Spirochaetaceae; g__Treponema 2; s__uncultured rumen bacterium
OTU_2158	1	0	0	0	0	0	0	0	1	0	0	0	0	1	0	0	0	0	k__Bacteria; p__Firmicutes; c__Clostridia; o__Clostridiales; f__Ruminococcaceae
OTU_819	10	7	5	2	4	14	5	9	3	2	7	4	6	1	0	2	0	0	k__Bacteria; p__Firmicutes; c__Clostridia; o__Clostridiales; f__Ruminococcaceae; g__Ruminococcus 1; s__uncultured rumen bacterium
OTU_178	62	10	0	3	0	6	3	14	1	25	7	27	44	4	7	0	0	0	k__Bacteria; p__Firmicutes; c__Negativicutes; o__Selenomonadales; f__Acidaminococcaceae; g__Acidaminococcus
OTU_2557	16	17	8	8	6	4	25	14	1	10	5	11	20	4	1	14	20	5	k__Bacteria; p__Firmicutes; c__Clostridia; o__Clostridiales; f__Ruminococcaceae; g__Ruminococcaceae UCG-014
OTU_374	17	10	18	38	8	64	23	25	21	26	27	25	42	19	16	6	15	16	k__Bacteria; p__Firmicutes; c__Clostridia; o__Clostridiales; f__Ruminococcaceae; g__Saccharofermentans; s__uncultured bacterium
OTU_1496	2	2	0	0	1	0	0	0	0	0	0	0	2	2	0	0	1	1	k__Bacteria; p__Firmicutes; c__Erysipelotrichia; o__Erysipelotrichales; f__Erysipelotrichaceae; g__Catenisphaera
OTU_1493	9	3	1	5	3	4	5	0	3	3	1	3	2	1	4	2	3	4	k__Bacteria; p__Firmicutes; c__Clostridia; o__Clostridiales; f__Family XIII; g__[Eubacterium] nodatum group; s__uncultured rumen bacterium
OTU_156	78	36	25	44	22	20	41	56	11	118	18	51	33	39	43	60	19	8	k__Bacteria; p__Firmicutes; c__Clostridia; o__Clostridiales; f__Lachnospiraceae; g__Lachnospira
OTU_1923	18	10	0	7	2	9	12	18	20	15	8	18	22	12	2	4	18	0	k__Bacteria; p__Firmicutes; c__Clostridia; o__Clostridiales; f__Ruminococcaceae; g__Ruminococcaceae UCG-014; s__uncultured bacterium
OTU_2327	1	0	0	0	1	0	1	0	0	0	0	0	0	0	0	0	0	0	k__Bacteria; p__Proteobacteria; c__Gammaproteobacteria; o__Betaproteobacteriales; f__Burkholderiaceae; g__Sutterella; s__gut metagenome
OTU_2407	11	7	6	5	2	11	10	20	3	11	10	17	5	9	2	2	1	0	k__Bacteria; p__Firmicutes; c__Clostridia; o__Clostridiales; f__Lachnospiraceae
OTU_162	13	13	57	14	50	26	10	16	78	14	61	12	27	14	24	56	86	44	k__Bacteria; p__Firmicutes; c__Clostridia; o__Clostridiales; f__Ruminococcaceae; g__Ruminococcaceae UCG-004; s__uncultured rumen bacterium
OTU_648	7	13	3	10	1	29	12	7	4	11	6	5	2	10	3	0	6	0	k__Bacteria; p__Firmicutes; c__Clostridia; o__Clostridiales; f__Lachnospiraceae; g__[Eubacterium] ruminantium group; s__uncultured Lachnospiraceae bacterium
OTU_387	13	2	6	5	1	10	7	5	5	11	11	22	12	51	22	11	2	1	k__Bacteria; p__Firmicutes; c__Clostridia; o__Clostridiales; f__Lachnospiraceae; g__Shuttleworthia
OTU_1190	2	1	0	1	2	1	0	0	6	0	1	0	0	0	0	0	0	1	k__Bacteria; p__Bacteroidetes; c__Bacteroidia
OTU_2164	1	0	2	1	3	5	1	1	1	2	1	3	5	0	0	2	0	0	k__Bacteria; p__Firmicutes; c__Clostridia; o__Clostridiales; f__Lachnospiraceae
OTU_663	12	1	2	4	5	13	4	2	4	1	9	5	14	4	0	3	5	0	k__Bacteria; p__Bacteroidetes; c__Bacteroidia; o__Bacteroidales; f__Prevotellaceae; g__Prevotellaceae UCG-001; s__uncultured bacterium
OTU_7688	1	2	2	0	0	0	2	2	1	10	2	1	0	4	12	1	0	0	k__Bacteria; p__Bacteroidetes; c__Bacteroidia; o__Bacteroidales; f__Prevotellaceae; g__Prevotella 7; s__uncultured bacterium
OTU_797	2	12	13	18	19	16	6	6	26	6	5	11	17	10	19	28	50	39	k__Bacteria; p__Firmicutes; c__Clostridia; o__Clostridiales; f__Lachnospiraceae; g__Acetitomaculum; s__uncultured rumen bacterium 6C3d-13
OTU_8785	1	1	0	0	0	0	1	1	0	2	0	3	0	4	0	0	0	0	k__Bacteria; p__Firmicutes; c__Clostridia; o__Clostridiales; f__Lachnospiraceae
OTU_1908	3	9	2	3	10	6	16	6	0	2	5	5	14	7	10	3	1	0	k__Bacteria; p__Firmicutes; c__Clostridia; o__Clostridiales; f__Ruminococcaceae; g__Ruminococcaceae UCG-013
OTU_214	22	44	67	47	122	59	42	40	54	36	57	32	62	25	61	51	56	46	k__Bacteria; p__Bacteroidetes; c__Bacteroidia; o__Bacteroidales; f__Prevotellaceae; g__Prevotella 1; s__uncultured rumen bacterium
OTU_29	26	64	99	62	183	131	176	56	20	265	86	19	27	90	184	108	257	186	k__Bacteria; p__Firmicutes; c__Clostridia; o__Clostridiales; f__Ruminococcaceae; g__Ruminococcaceae UCG-005; s__uncultured rumen bacterium
OTU_11110	6	1	1	0	3	0	1	1	3	0	5	8	5	7	2	6	1	4	k__Bacteria; p__Firmicutes; c__Clostridia; o__Clostridiales; f__Ruminococcaceae
OTU_427	19	21	43	34	7	36	21	27	3	18	23	16	40	1	21	5	30	12	k__Bacteria; p__Bacteroidetes; c__Bacteroidia; o__Bacteroidales; f__Prevotellaceae; g__Prevotellaceae UCG-001; s__uncultured rumen bacterium
OTU_1966	2	0	0	1	2	0	1	0	0	1	0	0	0	0	0	0	1	2	k__Bacteria; p__Tenericutes; c__Mollicutes; o__Mollicutes RF39
OTU_328	11	17	11	17	31	26	5	6	14	8	11	12	15	4	11	10	3	5	k__Bacteria; p__Bacteroidetes; c__Bacteroidia; o__Bacteroidales; f__Prevotellaceae; g__Prevotellaceae UCG-001; s__uncultured rumen bacterium
OTU_2035	9	15	13	26	10	11	12	3	20	3	17	4	12	13	17	6	7	10	k__Bacteria; p__Bacteroidetes; c__Bacteroidia; o__Bacteroidales; f__Prevotellaceae; g__Prevotella 1; s__uncultured bacterium
OTU_270	11	13	52	35	51	20	35	23	28	30	44	24	28	25	57	39	30	34	k__Bacteria; p__Bacteroidetes; c__Bacteroidia; o__Bacteroidales; f__Prevotellaceae; g__Prevotella 1
OTU_7678	1	1	11	2	22	8	16	5	5	10	18	1	9	4	12	19	30	66	k__Bacteria; p__Firmicutes; c__Clostridia; o__Clostridiales; f__Ruminococcaceae; g__Ruminococcus 2
OTU_798	1	3	8	8	4	7	8	5	9	9	4	4	10	0	2	2	5	5	k__Bacteria; p__Bacteroidetes; c__Bacteroidia; o__Bacteroidales; f__Prevotellaceae; g__Prevotella 1
OTU_227	32	34	15	29	78	44	10	25	110	2	29	12	62	21	22	39	46	140	k__Bacteria; p__Firmicutes; c__Clostridia; o__Clostridiales; f__Lachnospiraceae; g__Lachnospiraceae NK3A20 group
OTU_3268	0	0	1	0	0	0	0	0	1	0	0	3	0	5	0	0	4	0	k__Bacteria; p__Firmicutes; c__Clostridia; o__Clostridiales; f__Lachnospiraceae
OTU_365	8	8	7	12	0	10	4	3	24	9	3	9	13	3	6	3	0	0	k__Bacteria; p__Firmicutes; c__Erysipelotrichia; o__Erysipelotrichales; f__Erysipelotrichaceae; g__Asteroleplasma
OTU_355	7	14	4	13	16	30	1	12	17	10	22	13	22	9	2	0	4	4	k__Bacteria; p__Firmicutes; c__Clostridia; o__Clostridiales; f__Ruminococcaceae; g__Ruminococcus 1; s__bacterium V9D2012
OTU_408	9	3	33	15	25	17	14	9	8	14	13	13	20	18	27	29	6	8	k__Bacteria; p__Bacteroidetes; c__Bacteroidia; o__Bacteroidales; f__Muribaculaceae; g__uncultured rumen bacterium; s__uncultured rumen bacterium
OTU_313	13	17	15	13	33	17	18	10	10	9	24	22	23	16	8	0	4	6	k__Bacteria; p__Bacteroidetes; c__Bacteroidia; o__Bacteroidales; f__Prevotellaceae; g__Prevotellaceae UCG-003
OTU_6131	0	1	0	1	2	2	2	0	0	0	0	0	1	0	0	3	2	0	k__Bacteria; p__Firmicutes; c__Clostridia; o__Clostridiales; f__Lachnospiraceae; g__Lachnospiraceae NK3A20 group; s__uncultured Firmicutes bacterium
OTU_7927	0	0	0	0	0	0	0	0	0	0	0	6	0	0	0	0	0	0	k__Bacteria; p__Firmicutes; c__Clostridia; o__Clostridiales; f__Ruminococcaceae; g__Ruminococcaceae UCG-010; s__uncultured bacterium
OTU_666	1	9	1	6	5	2	1	5	2	1	4	5	8	4	4	5	10	5	k__Bacteria; p__Firmicutes; c__Clostridia; o__Clostridiales; f__Lachnospiraceae
OTU_1055	3	4	0	3	0	0	4	0	2	9	2	8	5	0	0	0	5	0	k__Bacteria; p__Firmicutes; c__Clostridia; o__Clostridiales; f__Lachnospiraceae
OTU_7616	1	3	1	2	1	2	0	0	2	0	0	1	2	0	0	0	0	3	k__Bacteria; p__Firmicutes; c__Clostridia; o__Clostridiales; f__Lachnospiraceae
OTU_5126	0	0	0	0	0	0	0	0	0	0	0	1	0	0	0	0	0	0	k__Bacteria; p__Firmicutes; c__Clostridia; o__Clostridiales; f__Lachnospiraceae
OTU_813	12	3	7	14	9	2	0	3	0	34	2	6	2	15	4	1	1	0	k__Bacteria; p__Firmicutes; c__Clostridia; o__Clostridiales; f__Lachnospiraceae
OTU_188	9	7	20	23	37	21	11	11	18	10	41	9	46	47	34	31	49	44	k__Bacteria; p__Firmicutes; c__Clostridia; o__Clostridiales; f__Christensenellaceae; g__Christensenellaceae R-7 group; s__uncultured rumen bacterium
OTU_808	3	4	0	0	0	0	4	1	0	3	0	7	0	0	0	0	0	0	k__Bacteria; p__Firmicutes; c__Erysipelotrichia; o__Erysipelotrichales; f__Erysipelotrichaceae
OTU_947	3	1	9	0	0	2	19	3	0	3	9	10	1	2	10	4	1	0	k__Bacteria; p__Bacteroidetes; c__Bacteroidia; o__Bacteroidales; f__Muribaculaceae; g__uncultured rumen bacterium; s__uncultured rumen bacterium
OTU_1375	10	46	43	31	167	29	10	13	47	12	102	22	91	109	36	79	44	157	k__Bacteria; p__Firmicutes; c__Clostridia; o__Clostridiales; f__Ruminococcaceae; g__Ruminococcaceae NK4A214 group
OTU_556	6	3	11	11	19	6	14	1	3	11	7	6	6	16	22	18	15	18	k__Bacteria; p__Firmicutes; c__Clostridia; o__Clostridiales; f__Ruminococcaceae; g__Ruminococcaceae NK4A214 group; s__uncultured bacterium
OTU_2047	0	1	1	0	2	1	2	1	1	1	1	0	0	1	1	2	2	0	k__Bacteria; p__Bacteroidetes; c__Bacteroidia; o__Bacteroidales; f__F082; g__uncultured rumen bacterium; s__uncultured rumen bacterium
OTU_3617	7	10	1	2	0	1	2	0	0	3	1	4	1	1	0	1	1	0	k__Bacteria; p__Firmicutes; c__Clostridia; o__Clostridiales; f__Lachnospiraceae
OTU_2324	7	4	144	12	14	58	11	40	4	6	33	14	10	62	23	37	50	10	k__Bacteria; p__Firmicutes; c__Negativicutes; o__Selenomonadales; f__Acidaminococcaceae; g__Succiniclasticum; s__uncultured rumen bacterium
OTU_542	20	11	10	7	20	8	2	6	10	3	16	8	15	6	9	19	18	13	k__Bacteria; p__Firmicutes; c__Clostridia; o__Clostridiales; f__Lachnospiraceae; g__Roseburia; s__uncultured rumen bacterium
OTU_1589	1	0	1	3	0	3	0	1	1	1	0	1	7	0	0	1	2	0	k__Bacteria; p__Firmicutes; c__Clostridia; o__Clostridiales; f__Ruminococcaceae
OTU_344	8	8	10	9	0	3	8	9	27	3	11	7	6	4	7	17	12	7	k__Bacteria; p__Firmicutes; c__Clostridia; o__Clostridiales; f__Lachnospiraceae; g__Coprococcus 1
OTU_6713	5	0	2	2	6	1	6	6	0	3	6	8	10	4	10	4	17	8	k__Bacteria; p__Firmicutes; c__Clostridia; o__Clostridiales; f__Ruminococcaceae; g__Ruminococcus 2
OTU_1089	4	2	11	6	5	9	4	4	8	3	15	2	9	6	5	7	4	3	k__Bacteria; p__Bacteroidetes; c__Bacteroidia; o__Bacteroidales; f__Prevotellaceae; g__Prevotella 1; s__uncultured bacterium
OTU_597	2	6	18	14	10	24	13	11	2	8	20	8	7	9	5	6	8	11	k__Bacteria; p__Bacteroidetes; c__Bacteroidia; o__Bacteroidales; f__Prevotellaceae; g__Prevotella 1
OTU_1076	2	1	0	9	0	6	0	0	0	0	1	0	1	0	0	0	0	0	k__Bacteria; p__Firmicutes; c__Erysipelotrichia; o__Erysipelotrichales; f__Erysipelotrichaceae; g__Erysipelatoclostridium; s__uncultured Firmicutes bacterium
OTU_149	5	13	44	23	104	107	42	39	22	10	86	12	26	84	59	52	11	7	k__Bacteria; p__Bacteroidetes; c__Bacteroidia; o__Bacteroidales; f__Prevotellaceae; g__Prevotella 1; s__uncultured bacterium
OTU_167	8	8	16	13	34	30	6	11	44	1	42	12	38	17	9	13	35	42	k__Bacteria; p__Firmicutes; c__Clostridia; o__Clostridiales; f__Ruminococcaceae
OTU_175	16	37	3	16	2	12	27	25	28	16	3	9	4	4	17	7	10	16	k__Bacteria; p__Tenericutes; c__Mollicutes; o__Mollicutes RF39; f__uncultured bacterium; g__uncultured bacterium; s__uncultured bacterium
OTU_845	3	7	0	2	3	1	1	0	0	2	7	1	3	6	1	5	1	0	k__Bacteria; p__Bacteroidetes; c__Bacteroidia; o__Bacteroidales; f__Muribaculaceae
OTU_858	4	1	2	4	8	2	0	2	23	0	1	4	4	4	6	10	5	30	k__Bacteria; p__Firmicutes; c__Clostridia; o__Clostridiales; f__Lachnospiraceae; g__Marvinbryantia; s__uncultured rumen bacterium
OTU_324	6	10	22	22	28	17	7	7	6	21	29	8	8	13	21	26	33	44	k__Bacteria; p__Firmicutes; c__Clostridia; o__Clostridiales; f__Ruminococcaceae
OTU_305	13	11	16	6	18	29	21	15	13	12	20	8	18	25	27	13	22	27	k__Bacteria; p__Bacteroidetes; c__Bacteroidia; o__Bacteroidales; f__Rikenellaceae; g__Rikenellaceae RC9 gut group; s__uncultured rumen bacterium
OTU_834	7	2	6	2	1	2	1	3	1	7	11	9	1	0	0	1	0	0	k__Bacteria; p__Cyanobacteria; c__Melainabacteria; o__Gastranaerophilales; f__uncultured rumen bacterium; g__uncultured rumen bacterium; s__uncultured rumen bacterium
OTU_445	8	11	9	4	4	12	7	4	24	5	9	5	8	5	3	3	5	2	k__Bacteria; p__Firmicutes; c__Clostridia; o__Clostridiales; f__Family XIII
OTU_2382	17	10	2	3	1	0	1	3	0	4	5	14	4	3	0	1	1	0	k__Bacteria; p__Firmicutes; c__Clostridia; o__Clostridiales; f__Lachnospiraceae; g__Syntrophococcus; s__uncultured bacterium
OTU_4733	2	7	0	3	2	0	1	2	1	0	2	1	3	5	0	0	1	1	k__Bacteria; p__Firmicutes; c__Clostridia; o__Clostridiales; f__Ruminococcaceae; g__Ruminococcaceae UCG-014
OTU_4222	15	7	1	1	0	1	0	7	0	10	0	3	0	5	1	2	0	0	k__Bacteria; p__Firmicutes; c__Clostridia; o__Clostridiales; f__Lachnospiraceae
OTU_1436	2	2	3	5	0	2	0	1	2	2	1	0	2	1	0	1	0	4	k__Bacteria; p__Firmicutes; c__Clostridia; o__Clostridiales; f__Lachnospiraceae; g__Syntrophococcus; s__uncultured rumen bacterium
OTU_1577	3	14	24	12	10	14	6	12	3	6	12	11	5	3	7	7	1	6	k__Bacteria; p__Bacteroidetes; c__Bacteroidia; o__Bacteroidales; f__Prevotellaceae; g__Prevotella 1; s__uncultured rumen bacterium
OTU_715	5	4	4	4	0	13	2	3	1	3	11	17	2	5	4	2	0	0	k__Bacteria; p__Bacteroidetes; c__Bacteroidia; o__Bacteroidales; f__Prevotellaceae; g__Prevotellaceae UCG-003; s__uncultured rumen bacterium
OTU_168	4	4	16	44	171	21	8	5	23	4	17	8	22	63	38	148	112	195	k__Bacteria; p__Bacteroidetes; c__Bacteroidia; o__Bacteroidales; f__Rikenellaceae; g__Rikenellaceae RC9 gut group; s__uncultured rumen bacterium
OTU_659	7	1	5	14	0	5	0	5	4	1	3	22	16	0	3	4	3	0	k__Bacteria; p__Firmicutes; c__Negativicutes; o__Selenomonadales; f__Veillonellaceae; g__Allisonella; s__uncultured bacterium
OTU_8389	1	2	0	0	3	1	2	3	0	2	0	1	2	0	0	0	0	1	k__Bacteria; p__Firmicutes; c__Clostridia; o__Clostridiales; f__Ruminococcaceae; g__Ruminococcaceae UCG-001; s__uncultured rumen bacterium
OTU_413	4	13	17	46	60	44	13	12	20	19	24	13	44	29	8	11	15	44	k__Bacteria; p__Bacteroidetes; c__Bacteroidia; o__Bacteroidales; f__Rikenellaceae; g__Rikenellaceae RC9 gut group; s__uncultured rumen bacterium
OTU_906	4	5	5	25	10	9	0	0	3	0	1	0	3	0	3	5	5	0	k__Bacteria; p__Firmicutes; c__Clostridia; o__Clostridiales; f__Ruminococcaceae; g__Negativibacillus; s__uncultured bacterium
OTU_8997	4	6	6	2	4	7	0	2	3	5	4	3	2	8	3	9	0	7	k__Bacteria; p__Firmicutes; c__Clostridia; o__Clostridiales; f__Ruminococcaceae; g__Ruminococcaceae UCG-004
OTU_121	3	13	22	90	35	45	9	8	33	20	26	11	53	13	30	21	24	72	k__Bacteria; p__Bacteroidetes; c__Bacteroidia; o__Bacteroidales; f__Rikenellaceae; g__SP3-e08; s__uncultured rumen bacterium
OTU_373	20	6	14	5	4	3	18	5	12	13	10	3	25	10	4	3	13	9	k__Bacteria; p__Firmicutes; c__Clostridia; o__Clostridiales; f__Ruminococcaceae; g__Ruminococcaceae UCG-014; s__uncultured rumen bacterium
OTU_7710	0	3	1	2	0	0	3	0	1	1	2	2	1	10	0	0	1	0	k__Bacteria; p__Firmicutes; c__Clostridia; o__Clostridiales; f__Ruminococcaceae; g__Ruminococcaceae NK4A214 group
OTU_6	30	11	832	184	368	267	25	56	313	24	509	75	118	174	375	493	801	296	k__Bacteria; p__Firmicutes; c__Negativicutes; o__Selenomonadales; f__Acidaminococcaceae; g__Succiniclasticum; s__uncultured rumen bacterium
OTU_3570	3	0	6	0	2	6	7	4	6	12	8	7	6	6	15	3	3	0	k__Bacteria; p__Bacteroidetes; c__Bacteroidia; o__Bacteroidales; f__Prevotellaceae; g__Prevotella 1
OTU_1344	10	1	3	4	3	6	2	5	10	1	4	3	3	0	2	2	2	2	k__Bacteria; p__Bacteroidetes; c__Bacteroidia; o__Bacteroidales; f__uncultured; g__uncultured rumen bacterium; s__uncultured rumen bacterium
OTU_513	4	2	8	6	2	18	1	1	6	7	15	4	5	0	2	8	11	32	k__Bacteria; p__Firmicutes; c__Clostridia; o__Clostridiales; f__Lachnospiraceae; g__Shuttleworthia; s__uncultured bacterium
OTU_2449	1	0	1	1	4	3	3	1	0	1	1	0	3	0	4	8	1	0	k__Bacteria; p__Bacteroidetes; c__Bacteroidia; o__Bacteroidales; f__Muribaculaceae; g__uncultured rumen bacterium; s__uncultured rumen bacterium
OTU_2826	1	5	0	0	1	0	2	3	1	0	2	3	1	0	0	0	1	0	k__Bacteria; p__Firmicutes; c__Clostridia; o__Clostridiales; f__Lachnospiraceae; g__Shuttleworthia
OTU_3851	3	3	1	3	8	2	0	2	10	1	0	4	3	2	1	3	5	9	k__Bacteria; p__Firmicutes; c__Clostridia; o__Clostridiales; f__Lachnospiraceae; g__Butyrivibrio 2; s__uncultured rumen bacterium
OTU_570	5	1	0	7	3	3	0	5	14	1	6	3	9	0	1	8	5	6	k__Bacteria; p__Firmicutes; c__Erysipelotrichia; o__Erysipelotrichales; f__Erysipelotrichaceae; g__Erysipelotrichaceae UCG-008; s__uncultured rumen bacterium
OTU_2240	3	14	9	4	16	6	8	11	13	3	20	8	9	19	17	15	33	27	k__Bacteria; p__Firmicutes; c__Clostridia; o__Clostridiales; f__Lachnospiraceae; g__Moryella; s__uncultured rumen bacterium
OTU_213	8	11	13	17	12	7	0	0	38	23	21	10	23	2	13	7	2	62	k__Bacteria; p__Actinobacteria; c__Actinobacteria; o__Bifidobacteriales; f__Bifidobacteriaceae; g__Pseudoscardovia; s__uncultured bacterium
OTU_3769	0	4	2	2	0	0	1	2	1	2	0	2	2	1	2	1	0	1	k__Bacteria; p__Firmicutes; c__Clostridia; o__Clostridiales; f__Lachnospiraceae
OTU_1046	9	7	11	8	10	7	0	4	0	2	8	10	3	1	3	3	0	5	k__Bacteria; p__Bacteroidetes; c__Bacteroidia; o__Bacteroidales; f__Prevotellaceae; g__Prevotella 1
OTU_576	9	6	10	18	6	6	5	6	11	11	15	14	11	2	10	3	12	11	k__Bacteria; p__Firmicutes; c__Clostridia; o__Clostridiales; f__Lachnospiraceae; g__probable genus 10
OTU_714	3	8	6	7	1	18	2	5	20	5	13	7	24	14	6	8	11	16	k__Bacteria; p__Firmicutes; c__Clostridia; o__Clostridiales; f__Lachnospiraceae; g__Lachnospiraceae UCG-002
OTU_3602	6	2	0	2	3	0	0	1	6	0	1	0	3	1	1	1	1	2	k__Bacteria; p__Firmicutes; c__Clostridia; o__Clostridiales; f__Lachnospiraceae; g__Lachnospiraceae UCG-008; s__uncultured Lachnospiraceae bacterium
OTU_757	3	11	4	15	6	9	1	3	4	5	3	8	8	14	3	5	10	3	k__Bacteria; p__Firmicutes; c__Clostridia; o__Clostridiales; f__Lachnospiraceae
OTU_3023	12	7	12	32	20	8	9	2	25	5	10	8	19	6	9	9	10	11	k__Bacteria; p__Firmicutes; c__Clostridia; o__Clostridiales; f__Lachnospiraceae; g__Butyrivibrio 2; s__uncultured rumen bacterium
OTU_449	3	4	8	8	1	11	6	9	6	8	14	8	10	24	2	6	1	5	k__Bacteria; p__Firmicutes; c__Clostridia; o__Clostridiales; f__Christensenellaceae; g__Christensenellaceae R-7 group
OTU_973	0	1	2	3	0	3	0	0	2	0	4	1	0	0	1	1	3	2	k__Bacteria; p__Bacteroidetes; c__Bacteroidia; o__Bacteroidales; f__F082; g__uncultured rumen bacterium; s__uncultured rumen bacterium
OTU_857	7	5	1	0	0	5	7	12	4	12	0	8	4	1	1	3	6	2	k__Bacteria; p__Bacteroidetes; c__Bacteroidia; o__Bacteroidales; f__Prevotellaceae
OTU_9925	1	12	3	3	3	7	4	9	4	10	10	9	12	17	5	9	24	8	k__Bacteria; p__Firmicutes; c__Clostridia; o__Clostridiales; f__Lachnospiraceae; g__Lachnoclostridium 1
OTU_831	2	1	1	3	10	6	8	3	3	0	7	1	4	1	3	0	0	1	k__Bacteria; p__Bacteroidetes; c__Bacteroidia; o__Bacteroidales; f__Rikenellaceae; g__Rikenellaceae RC9 gut group; s__uncultured bacterium
OTU_8182	7	1	0	1	0	3	4	3	0	5	3	4	1	1	3	1	0	0	k__Bacteria; p__Firmicutes; c__Clostridia; o__Clostridiales; f__Ruminococcaceae; g__Ruminococcaceae UCG-014
OTU_1103	8	23	9	15	14	19	23	8	1	7	19	4	13	1	13	11	2	0	k__Bacteria; p__Bacteroidetes; c__Bacteroidia; o__Bacteroidales; f__Muribaculaceae; g__uncultured rumen bacterium; s__uncultured rumen bacterium
OTU_5188	1	0	1	1	0	12	0	0	1	0	0	0	1	3	1	0	1	0	k__Bacteria; p__Bacteroidetes; c__Bacteroidia; o__Bacteroidales; f__Prevotellaceae; g__Prevotella 1; s__uncultured rumen bacterium
OTU_1013	2	0	14	2	9	7	0	2	1	6	2	4	0	1	5	9	5	10	k__Bacteria; p__Bacteroidetes; c__Bacteroidia; o__Bacteroidales; f__Prevotellaceae; g__Prevotella 1; s__uncultured rumen bacterium
OTU_320	1	5	4	8	13	5	5	6	5	5	17	7	3	4	8	6	15	9	k__Bacteria; p__Firmicutes; c__Erysipelotrichia; o__Erysipelotrichales; f__Erysipelotrichaceae
OTU_10098	3	1	1	0	1	2	3	4	3	4	1	1	0	3	2	2	0	3	k__Bacteria; p__Bacteroidetes; c__Bacteroidia; o__Bacteroidales; f__Prevotellaceae; g__Prevotella 1
OTU_106	10	14	25	33	41	24	4	17	37	9	34	10	42	42	26	16	69	116	k__Bacteria; p__Firmicutes; c__Clostridia; o__Clostridiales; f__Christensenellaceae; g__Christensenellaceae R-7 group; s__uncultured rumen bacterium
OTU_946	8	4	2	8	1	4	5	2	1	0	5	2	3	3	1	2	3	2	k__Bacteria; p__Bacteroidetes; c__Bacteroidia; o__Bacteroidales; f__Rikenellaceae; g__Rikenellaceae RC9 gut group
OTU_1299	4	22	95	55	151	57	21	33	31	26	164	41	123	149	99	162	104	143	k__Bacteria; p__Firmicutes; c__Clostridia; o__Clostridiales; f__Ruminococcaceae; g__Ruminococcaceae NK4A214 group
OTU_368	10	34	19	20	22	9	10	15	16	8	18	8	12	15	2	3	1	1	k__Bacteria; p__Bacteroidetes; c__Bacteroidia; o__Bacteroidales; f__Prevotellaceae; g__Prevotella 1
OTU_848	3	12	3	4	6	6	5	6	14	6	10	5	14	4	7	4	7	11	k__Bacteria; p__Firmicutes; c__Clostridia; o__Clostridiales; f__Lachnospiraceae; g__[Eubacterium] hallii group; s__uncultured rumen bacterium
OTU_791	3	6	2	2	0	4	3	4	4	4	3	0	3	0	0	1	0	2	k__Bacteria; p__Tenericutes; c__Mollicutes; o__Mollicutes RF39
OTU_1637	1	2	2	1	0	3	2	1	1	0	1	3	0	0	0	0	0	0	k__Bacteria; p__Tenericutes; c__Mollicutes; o__Mollicutes RF39
OTU_152	12	16	7	29	6	18	3	7	51	16	35	34	30	36	21	19	16	4	k__Bacteria; p__Firmicutes; c__Clostridia; o__Clostridiales; f__Ruminococcaceae; g__Subdoligranulum; s__uncultured bacterium
OTU_594	5	0	6	1	5	6	3	1	7	5	8	0	2	11	2	7	13	9	k__Bacteria; p__Firmicutes; c__Clostridia; o__Clostridiales; f__Family XIII; g__[Eubacterium] nodatum group; s__uncultured rumen bacterium
OTU_3004	8	13	13	4	3	9	4	20	13	27	11	5	9	13	20	19	1	3	k__Bacteria; p__Bacteroidetes; c__Bacteroidia; o__Bacteroidales; f__Prevotellaceae; g__Prevotella 7; s__uncultured bacterium
OTU_893	1	0	6	8	11	5	22	5	0	8	19	3	12	4	13	21	6	0	k__Bacteria; p__Bacteroidetes; c__Bacteroidia; o__Bacteroidales; f__Muribaculaceae; g__uncultured rumen bacterium; s__uncultured rumen bacterium
OTU_1875	0	0	0	1	1	1	1	2	2	0	0	0	0	0	0	0	0	0	k__Bacteria; p__Patescibacteria; c__Saccharimonadia; o__Saccharimonadales; f__Saccharimonadaceae; g__Candidatus Saccharimonas; s__uncultured bacterium
OTU_636	5	4	15	7	6	7	5	11	8	5	14	12	7	4	14	8	14	0	k__Bacteria; p__Bacteroidetes; c__Bacteroidia; o__Bacteroidales; f__uncultured; g__uncultured rumen bacterium; s__uncultured rumen bacterium
OTU_226	12	6	30	24	56	18	15	6	15	16	13	8	35	49	12	16	26	35	k__Bacteria; p__Bacteroidetes; c__Bacteroidia; o__Bacteroidales; f__Rikenellaceae; g__Rikenellaceae RC9 gut group
OTU_1862	2	1	0	0	0	2	0	1	0	3	0	2	0	0	2	1	0	0	k__Bacteria; p__Bacteroidetes; c__Bacteroidia; o__Bacteroidales; f__Prevotellaceae; g__Prevotella 7; s__uncultured bacterium
OTU_172	7	17	73	25	106	40	22	17	52	33	69	16	39	41	28	41	39	9	k__Bacteria; p__Bacteroidetes; c__Bacteroidia; o__Bacteroidales; f__Prevotellaceae; g__Prevotella 1; s__uncultured rumen bacterium
OTU_2765	3	2	3	1	1	2	3	4	4	6	0	2	1	8	2	0	0	0	k__Bacteria; p__Firmicutes; c__Clostridia; o__Clostridiales; f__Lachnospiraceae; g__[Eubacterium] ruminantium group
OTU_1478	0	1	16	4	8	1	1	2	0	2	15	7	5	10	12	13	3	13	k__Bacteria; p__Firmicutes; c__Clostridia; o__Clostridiales; f__Ruminococcaceae; g__Ruminococcaceae UCG-014; s__uncultured rumen bacterium
OTU_558	6	7	10	11	9	10	10	9	8	5	16	4	16	12	16	11	15	10	k__Bacteria; p__Bacteroidetes; c__Bacteroidia; o__Bacteroidales; f__Prevotellaceae
OTU_1202	14	8	0	1	0	2	8	7	1	3	0	6	2	1	1	1	0	0	k__Bacteria; p__Firmicutes; c__Clostridia; o__Clostridiales; f__Lachnospiraceae; g__Lachnospira; s__uncultured bacterium
OTU_1297	4	0	1	1	0	3	1	1	0	2	8	2	0	0	4	1	1	1	k__Bacteria; p__Tenericutes; c__Mollicutes; o__Mollicutes RF39
OTU_232	13	48	20	33	59	45	26	22	20	36	46	19	26	31	51	28	23	14	k__Bacteria; p__Bacteroidetes; c__Bacteroidia; o__Bacteroidales; f__Muribaculaceae; g__uncultured rumen bacterium; s__uncultured rumen bacterium
OTU_1880	1	0	0	0	0	1	0	0	2	0	0	0	0	0	1	0	0	0	k__Bacteria; p__Firmicutes; c__Erysipelotrichia; o__Erysipelotrichales; f__Erysipelotrichaceae; g__uncultured; s__uncultured rumen bacterium
OTU_3701	4	7	14	11	7	15	10	8	16	14	4	17	12	8	3	2	4	1	k__Bacteria; p__Firmicutes; c__Clostridia; o__Clostridiales; f__Ruminococcaceae; g__Ruminococcus 1
OTU_990	4	0	6	2	1	3	0	4	3	3	2	1	2	0	3	3	0	2	k__Bacteria; p__Firmicutes; c__Clostridia; o__Clostridiales; f__Lachnospiraceae
OTU_2701	3	2	1	0	5	4	1	0	4	0	1	2	3	11	2	0	3	2	k__Bacteria; p__Bacteroidetes; c__Bacteroidia; o__Bacteroidales; f__Rikenellaceae; g__Rikenellaceae RC9 gut group; s__uncultured rumen bacterium
OTU_1288	0	5	3	2	0	5	3	5	2	11	3	6	3	1	0	0	0	0	k__Bacteria; p__Bacteroidetes; c__Bacteroidia; o__Bacteroidales; f__Prevotellaceae
OTU_243	5	8	13	20	17	23	10	7	10	9	11	1	14	3	12	10	16	20	k__Bacteria; p__Bacteroidetes; c__Bacteroidia; o__Bacteroidales; f__Prevotellaceae; g__Prevotellaceae UCG-001; s__uncultured rumen bacterium
OTU_150	16	68	10	111	78	129	13	20	19	22	40	41	42	37	58	28	70	87	k__Bacteria; p__Tenericutes; c__Mollicutes; o__Anaeroplasmatales; f__Anaeroplasmataceae; g__Anaeroplasma; s__uncultured rumen bacterium
OTU_639	4	1	4	4	4	5	2	1	0	1	3	0	2	0	6	5	6	2	k__Bacteria; p__Bacteroidetes; c__Bacteroidia; o__Bacteroidales; f__Prevotellaceae; g__Prevotellaceae UCG-001
OTU_533	1	2	24	10	51	17	12	10	2	18	9	2	2	47	21	46	56	41	k__Bacteria; p__Bacteroidetes; c__Bacteroidia; o__Bacteroidales; f__Rikenellaceae; g__Rikenellaceae RC9 gut group; s__uncultured rumen bacterium
OTU_1572	3	6	0	0	0	0	2	1	0	3	0	2	0	0	0	0	0	0	k__Bacteria; p__Firmicutes; c__Clostridia; o__Clostridiales; f__Lachnospiraceae; g__Shuttleworthia
OTU_607	7	5	5	12	3	9	9	3	1	4	2	1	3	17	7	10	13	4	k__Bacteria; p__Bacteroidetes; c__Bacteroidia; o__Bacteroidales; f__Rikenellaceae
OTU_698	2	0	4	6	11	1	2	3	12	5	2	0	3	6	12	15	11	9	k__Bacteria; p__Firmicutes; c__Bacilli; o__Lactobacillales; f__Lactobacillaceae; g__Lactobacillus; s__Lactobacillus gasseri
OTU_995	1	0	4	2	1	0	0	0	2	4	4	1	4	1	6	0	1	2	k__Bacteria; p__Firmicutes; c__Clostridia; o__Clostridiales; f__Family XIII; g__Anaerovorax
OTU_586	9	6	2	6	6	14	10	1	6	2	6	20	1	2	2	2	1	0	k__Bacteria; p__Firmicutes; c__Clostridia; o__Clostridiales; f__Ruminococcaceae; g__Ruminococcaceae UCG-014; s__uncultured bacterium
OTU_1381	3	1	1	0	0	4	1	0	2	0	1	1	2	1	0	0	0	0	k__Bacteria; p__Firmicutes; c__Clostridia; o__Clostridiales; f__Ruminococcaceae; g__GCA-900066225; s__uncultured bacterium
OTU_7614	1	0	0	0	0	0	0	0	0	0	0	0	0	0	0	0	0	0	k__Bacteria; p__Firmicutes; c__Clostridia; o__Clostridiales; f__Family XIII
OTU_805	3	6	23	3	18	8	9	5	4	3	10	0	2	1	18	15	11	8	k__Bacteria; p__Bacteroidetes; c__Bacteroidia; o__Bacteroidales; f__Prevotellaceae; g__Prevotellaceae UCG-001; s__uncultured bacterium
OTU_685	17	4	3	1	4	7	1	2	2	27	14	12	2	1	3	0	4	0	k__Bacteria; p__Firmicutes; c__Clostridia; o__Clostridiales; f__Ruminococcaceae; g__Ruminococcaceae UCG-014; s__uncultured rumen bacterium
OTU_2693	7	1	4	9	1	14	10	6	0	6	3	13	1	5	4	2	3	1	k__Bacteria; p__Firmicutes; c__Clostridia; o__Clostridiales; f__Lachnospiraceae
OTU_3655	2	0	0	4	0	1	2	2	4	0	0	3	2	4	0	1	1	0	k__Bacteria; p__Firmicutes; c__Clostridia; o__Clostridiales; f__Christensenellaceae; g__Christensenellaceae R-7 group
OTU_1957	1	0	0	0	0	3	0	0	0	0	1	0	1	1	0	0	0	1	k__Bacteria; p__Firmicutes; c__Clostridia; o__Clostridiales; f__Defluviitaleaceae; g__Defluviitaleaceae UCG-011; s__uncultured rumen bacterium
OTU_1126	2	6	4	8	9	14	5	4	7	2	5	5	4	2	2	4	3	0	k__Bacteria; p__Bacteroidetes; c__Bacteroidia; o__Bacteroidales; f__Muribaculaceae; g__uncultured rumen bacterium; s__uncultured rumen bacterium
OTU_308	14	104	30	100	23	112	245	53	15	47	76	57	54	34	69	11	3	2	k__Bacteria; p__Bacteroidetes; c__Bacteroidia; o__Bacteroidales; f__Muribaculaceae; g__uncultured rumen bacterium; s__uncultured rumen bacterium
OTU_530	12	7	4	6	10	2	1	5	8	1	7	4	4	1	2	0	7	6	k__Bacteria; p__Cyanobacteria; c__Oxyphotobacteria; o__Chloroplast; f__Medicago truncatula (barrel medic); g__Medicago truncatula (barrel medic); s__Medicago truncatula (barrel medic)
OTU_678	3	0	13	7	17	17	1	8	20	4	17	6	10	21	15	17	13	8	k__Bacteria; p__Firmicutes; c__Clostridia; o__Clostridiales; f__Lachnospiraceae; g__Lachnospiraceae FCS020 group
OTU_922	3	7	6	6	1	7	6	1	0	4	6	6	3	8	1	2	1	0	k__Bacteria; p__Firmicutes; c__Clostridia; o__Clostridiales; f__Family XIII; g__Anaerovorax
OTU_1024	13	21	19	17	21	21	8	10	12	1	17	13	19	12	13	18	15	6	k__Bacteria; p__Bacteroidetes; c__Bacteroidia; o__Bacteroidales; f__Prevotellaceae; g__Prevotella 1
OTU_496	16	14	14	16	18	11	12	12	8	10	25	4	5	3	7	8	0	1	k__Bacteria; p__Bacteroidetes; c__Bacteroidia; o__Bacteroidales; f__Prevotellaceae; g__Prevotella 1
OTU_654	9	1	0	4	5	6	1	0	4	0	4	1	4	0	2	0	1	4	k__Bacteria; p__Spirochaetes; c__Spirochaetia; o__Spirochaetales; f__Spirochaetaceae; g__Treponema 2; s__uncultured bacterium
OTU_471	1	2	15	4	2	5	2	12	1	4	3	6	4	1	5	9	6	3	k__Bacteria; p__Bacteroidetes; c__Bacteroidia; o__Bacteroidales; f__Prevotellaceae; g__Prevotellaceae UCG-004; s__uncultured rumen bacterium
OTU_2256	2	2	3	0	11	1	0	0	2	0	1	2	3	1	2	2	9	3	k__Bacteria; p__Firmicutes; c__Clostridia; o__Clostridiales; f__Lachnospiraceae
OTU_539	11	13	13	7	6	5	6	7	0	16	10	9	4	4	6	5	0	0	k__Bacteria; p__Firmicutes; c__Clostridia; o__Clostridiales; f__Lachnospiraceae; g__Shuttleworthia; s__uncultured bacterium
OTU_1319	3	1	0	1	0	0	5	1	0	0	0	1	0	1	1	2	0	1	k__Bacteria; p__Bacteroidetes; c__Bacteroidia; o__Bacteroidales; f__Bacteroidaceae; g__Bacteroides; s__uncultured Bacteroides sp.
OTU_285	9	6	7	3	26	21	5	12	7	8	4	11	13	36	5	13	4	1	k__Bacteria; p__Firmicutes; c__Clostridia; o__Clostridiales; f__Ruminococcaceae
OTU_712	20	16	3	4	3	4	15	22	3	21	3	4	6	5	6	7	4	0	k__Bacteria; p__Firmicutes; c__Negativicutes; o__Selenomonadales; f__Veillonellaceae
OTU_10185	5	13	3	12	1	14	8	4	1	5	8	9	1	5	1	3	4	0	k__Bacteria; p__Firmicutes; c__Clostridia; o__Clostridiales; f__Ruminococcaceae; g__[Eubacterium] coprostanoligenes group
OTU_1218	3	2	4	2	0	1	0	2	1	6	1	0	1	1	2	0	3	0	k__Bacteria; p__Firmicutes; c__Clostridia; o__Clostridiales; f__Ruminococcaceae; g__Ruminococcus 1
OTU_3353	0	2	0	0	0	0	1	5	0	2	0	0	1	0	0	0	0	0	k__Bacteria; p__Firmicutes; c__Clostridia; o__Clostridiales; f__Lachnospiraceae
OTU_1801	1	0	0	1	1	2	3	0	0	0	2	0	0	0	0	0	0	1	k__Bacteria; p__Actinobacteria; c__Coriobacteriia; o__Coriobacteriales; f__Atopobiaceae; g__Atopobium; s__uncultured rumen bacterium
OTU_10000	1	0	0	1	0	1	0	1	1	2	1	0	1	1	2	1	0	0	k__Bacteria; p__Firmicutes; c__Clostridia; o__Clostridiales; f__Ruminococcaceae; g__Ruminococcaceae UCG-014; s__uncultured bacterium
OTU_2461	4	4	1	2	0	2	7	43	5	8	7	4	0	5	9	2	2	0	k__Bacteria; p__Bacteroidetes; c__Bacteroidia; o__Bacteroidales; f__Prevotellaceae; g__Prevotella 7; s__uncultured bacterium
OTU_7986	3	12	12	0	6	1	0	0	4	0	3	5	1	4	6	12	6	8	k__Bacteria; p__Firmicutes; c__Clostridia; o__Clostridiales; f__Ruminococcaceae; g__Ruminococcaceae NK4A214 group; s__uncultured bacterium
OTU_73	6	10	10	2	13	0	4	5	9	1	8	4	11	14	0	8	6	24	k__Bacteria; p__Firmicutes; c__Clostridia; o__Clostridiales; f__Christensenellaceae; g__Christensenellaceae R-7 group
OTU_1500	0	1	0	0	2	1	1	1	2	1	1	0	3	2	0	1	1	0	k__Bacteria; p__Bacteroidetes; c__Bacteroidia; o__Bacteroidales; f__Rikenellaceae; g__Rikenellaceae RC9 gut group; s__uncultured bacterium
OTU_2061	2	0	0	0	0	1	0	0	0	0	1	1	0	3	0	0	0	0	k__Bacteria; p__Firmicutes; c__Clostridia; o__Clostridiales; f__Ruminococcaceae; g__Ruminococcaceae UCG-010; s__uncultured Ruminococcaceae bacterium
OTU_1194	8	5	1	6	4	7	6	2	13	3	10	3	9	2	3	2	3	4	k__Bacteria; p__Firmicutes; c__Clostridia; o__Clostridiales; f__Peptococcaceae; g__uncultured; s__uncultured rumen bacterium
OTU_816	10	4	4	5	7	2	5	3	4	5	7	9	1	3	5	6	3	7	k__Bacteria; p__Firmicutes; c__Clostridia; o__Clostridiales; f__Family XIII; g__[Eubacterium] nodatum group; s__uncultured rumen bacterium
OTU_1189	7	2	4	7	4	0	4	1	9	2	2	4	14	4	0	7	6	11	k__Bacteria; p__Proteobacteria; c__Deltaproteobacteria; o__Desulfobacterales; f__Desulfobulbaceae; g__Desulfobulbus; s__uncultured rumen bacterium
OTU_1294	1	1	4	5	3	1	3	0	1	1	1	2	2	2	1	2	0	0	k__Bacteria; p__Firmicutes; c__Clostridia; o__Clostridiales; f__Lachnospiraceae
OTU_850	5	9	4	3	5	0	1	3	0	19	2	9	10	2	5	5	2	1	k__Bacteria; p__Firmicutes; c__Clostridia; o__Clostridiales; f__Lachnospiraceae; g__Lachnoclostridium 1; s__[Clostridium] aminophilum
OTU_899	4	0	1	2	26	1	0	0	0	0	0	0	0	0	0	0	4	0	k__Bacteria; p__Firmicutes; c__Clostridia; o__Clostridiales; f__Ruminococcaceae; g__Oscillibacter; s__uncultured bacterium
OTU_1861	4	1	10	2	5	8	0	0	2	1	10	0	7	1	3	1	3	8	k__Bacteria; p__Bacteroidetes; c__Bacteroidia; o__Bacteroidales; f__Prevotellaceae
OTU_2350	7	1	0	0	0	2	0	0	0	0	0	1	0	0	0	0	0	0	k__Bacteria; p__Firmicutes; c__Clostridia; o__Clostridiales; f__Lachnospiraceae
OTU_624	2	2	6	3	1	8	4	7	2	1	12	4	9	5	6	6	23	33	k__Bacteria; p__Firmicutes; c__Clostridia; o__Clostridiales; f__Lachnospiraceae; g__Moryella; s__uncultured rumen bacterium
OTU_3290	3	6	21	2	3	12	6	7	3	3	6	2	3	6	13	3	2	3	k__Bacteria; p__Bacteroidetes; c__Bacteroidia; o__Bacteroidales; f__Prevotellaceae; g__Prevotella 1; s__uncultured rumen bacterium
OTU_548	10	10	4	21	9	14	2	4	9	7	11	4	24	5	8	5	16	7	k__Bacteria; p__Firmicutes; c__Clostridia; o__Clostridiales; f__Lachnospiraceae; g__Lachnospiraceae NK4A136 group; s__uncultured rumen bacterium
OTU_895	2	0	0	2	2	3	0	2	3	0	2	3	0	5	0	0	7	5	k__Bacteria; p__Firmicutes; c__Clostridia; o__Clostridiales; f__Ruminococcaceae; g__Ruminococcaceae NK4A214 group
OTU_903	2	0	2	22	0	3	0	0	9	0	0	0	0	0	0	1	0	0	k__Bacteria; p__Firmicutes; c__Erysipelotrichia; o__Erysipelotrichales; f__Erysipelotrichaceae; g__Erysipelatoclostridium
OTU_56	2	3	21	5	152	10	0	2	3	0	15	2	10	35	13	13	32	12	k__Bacteria; p__Firmicutes; c__Clostridia; o__Clostridiales; f__Lachnospiraceae; g__Lachnospiraceae NK3A20 group; s__uncultured rumen bacterium 3C0d-1
OTU_1210	8	18	1	8	5	1	7	8	1	3	6	15	5	7	6	15	3	0	k__Bacteria; p__Firmicutes; c__Clostridia; o__Clostridiales; f__Ruminococcaceae; g__Ruminococcaceae UCG-014
OTU_4321	1	0	4	0	2	1	0	0	0	0	1	0	2	2	1	4	12	10	k__Bacteria; p__Firmicutes; c__Clostridia; o__Clostridiales; f__Ruminococcaceae
OTU_329	16	2	17	7	15	26	21	28	6	21	10	7	30	20	49	32	66	14	k__Bacteria; p__Firmicutes; c__Negativicutes; o__Selenomonadales; f__Veillonellaceae
OTU_216	25	10	9	28	9	73	26	22	16	22	31	26	43	12	6	4	5	4	k__Bacteria; p__Firmicutes; c__Clostridia; o__Clostridiales; f__Ruminococcaceae; g__Ruminococcus 1; s__uncultured rumen bacterium
OTU_1197	0	1	1	13	25	13	4	3	2	7	12	8	14	18	24	7	16	35	k__Bacteria; p__Firmicutes; c__Clostridia; o__Clostridiales; f__Christensenellaceae; g__Christensenellaceae R-7 group; s__uncultured rumen bacterium
OTU_447	4	10	4	7	13	16	11	2	2	3	16	0	3	30	2	1	8	1	k__Bacteria; p__Bacteroidetes; c__Bacteroidia; o__Bacteroidales; f__Rikenellaceae; g__Rikenellaceae RC9 gut group
OTU_515	1	5	9	5	10	10	5	13	4	4	7	3	13	4	7	1	25	7	k__Bacteria; p__Firmicutes; c__Clostridia; o__Clostridiales; f__Ruminococcaceae; g__[Eubacterium] coprostanoligenes group
OTU_1224	6	9	0	4	2	9	1	2	5	2	5	1	4	10	2	4	1	12	k__Bacteria; p__Bacteroidetes; c__Bacteroidia; o__Bacteroidales; f__Rikenellaceae; g__Rikenellaceae RC9 gut group; s__uncultured rumen bacterium
OTU_1557	1	2	4	2	0	0	3	6	0	1	1	3	2	0	3	2	0	0	k__Bacteria; p__Firmicutes; c__Negativicutes; o__Selenomonadales; f__Veillonellaceae
OTU_646	1	0	13	13	13	4	1	8	6	3	17	8	3	6	10	7	13	11	k__Bacteria; p__Firmicutes; c__Clostridia; o__Clostridiales; f__Lachnospiraceae; g__Lachnospiraceae FCS020 group; s__uncultured rumen bacterium
OTU_120	23	89	67	41	50	34	50	24	13	55	36	26	17	21	34	25	24	20	k__Bacteria; p__Bacteroidetes; c__Bacteroidia; o__Bacteroidales; f__Prevotellaceae; g__Prevotella 1; s__uncultured rumen bacterium
OTU_832	4	6	6	3	8	6	10	6	5	4	8	5	13	14	4	6	5	11	k__Bacteria; p__Bacteroidetes; c__Bacteroidia; o__Bacteroidales; f__Prevotellaceae; g__Prevotella 1; s__uncultured bacterium
OTU_9269	1	1	0	1	8	1	1	0	0	0	2	2	2	6	6	0	0	0	k__Bacteria; p__Firmicutes; c__Clostridia; o__Clostridiales; f__Ruminococcaceae; g__Ruminococcaceae UCG-014; s__unidentified
OTU_234	8	2	2	5	14	3	6	0	5	8	4	2	2	0	2	1	5	4	k__Bacteria; p__Firmicutes; c__Clostridia; o__Clostridiales; f__Lachnospiraceae
OTU_1348	2	0	0	2	1	0	2	0	0	0	1	2	3	0	0	1	0	0	k__Bacteria; p__Firmicutes; c__Clostridia; o__Clostridiales; f__Ruminococcaceae; g__Ruminococcaceae UCG-014
OTU_1775	11	0	0	0	0	0	0	1	0	3	0	1	0	0	0	0	0	0	k__Bacteria; p__Firmicutes; c__Clostridia; o__Clostridiales; f__Family XIII; g__[Eubacterium] nodatum group; s__uncultured bacterium
OTU_1161	2	0	1	2	0	0	1	1	0	0	2	2	0	2	0	0	0	0	k__Bacteria; p__Firmicutes; c__Negativicutes; o__Selenomonadales; f__Acidaminococcaceae; g__Acidaminococcus
OTU_730	19	6	3	8	0	5	3	2	20	3	10	11	7	2	5	9	0	0	k__Bacteria; p__Firmicutes; c__Clostridia; o__Clostridiales; f__Lachnospiraceae
OTU_6573	2	0	0	1	0	0	0	2	0	0	0	0	1	3	1	0	1	0	k__Bacteria; p__Firmicutes; c__Clostridia; o__Clostridiales
OTU_549	0	5	4	4	12	11	1	3	3	1	4	4	4	7	1	2	4	6	k__Bacteria; p__Bacteroidetes; c__Bacteroidia; o__Bacteroidales; f__Prevotellaceae; g__Prevotella 1
OTU_1305	7	1	1	4	3	7	1	1	1	5	6	0	0	0	1	0	0	2	k__Bacteria; p__Tenericutes; c__Mollicutes; o__Mollicutes RF39
OTU_1158	1	4	14	3	0	1	3	14	0	1	2	1	2	0	3	2	2	0	k__Bacteria; p__Firmicutes; c__Negativicutes; o__Selenomonadales; f__Veillonellaceae; g__uncultured; s__uncultured rumen bacterium
OTU_4013	6	14	0	4	2	2	5	9	1	7	0	4	2	3	4	2	2	0	k__Bacteria; p__Firmicutes; c__Clostridia; o__Clostridiales
OTU_1480	1	1	0	0	3	1	3	0	2	0	2	1	4	2	0	0	1	1	k__Bacteria; p__Proteobacteria; c__Deltaproteobacteria; o__Desulfobacterales; f__Desulfobulbaceae; g__Desulfobulbus
OTU_319	3	3	121	10	125	29	6	7	25	2	13	3	15	16	19	41	16	9	k__Bacteria; p__Bacteroidetes; c__Bacteroidia; o__Bacteroidales; f__Prevotellaceae; g__Prevotella 1
OTU_2039	0	1	0	0	0	1	0	0	0	0	0	1	3	0	0	0	0	1	k__Bacteria; p__Firmicutes; c__Clostridia; o__Clostridiales; f__Family XIII; g__Anaerovorax; s__uncultured rumen bacterium
OTU_2022	0	0	3	1	1	2	0	1	0	1	0	1	0	0	2	0	0	0	k__Bacteria; p__Firmicutes; c__Clostridia; o__Clostridiales; f__Lachnospiraceae
OTU_2169	18	10	20	15	9	26	13	12	25	12	33	14	19	12	8	4	10	4	k__Bacteria; p__Firmicutes; c__Clostridia; o__Clostridiales; f__Ruminococcaceae; g__Ruminococcus 1
OTU_3100	0	0	0	0	0	0	0	0	0	1	0	0	0	0	0	0	0	0	k__Bacteria; p__Firmicutes; c__Clostridia; o__Clostridiales; f__Lachnospiraceae; g__[Eubacterium] oxidoreducens group; s__uncultured rumen bacterium
OTU_2311	1	0	0	0	0	1	2	1	0	0	0	0	0	0	0	0	0	0	k__Bacteria; p__Bacteroidetes; c__Bacteroidia; o__Flavobacteriales; f__Flavobacteriaceae
OTU_6761	1	0	1	0	0	2	0	0	0	1	1	3	1	7	7	4	2	0	k__Bacteria; p__Bacteroidetes; c__Bacteroidia; o__Bacteroidales; f__Prevotellaceae
OTU_1646	8	1	2	4	1	1	0	1	0	5	0	1	4	0	4	3	1	0	k__Bacteria; p__Firmicutes; c__Clostridia; o__Clostridiales; f__Lachnospiraceae; g__Roseburia; s__uncultured bacterium
OTU_3059	3	2	3	3	3	1	0	1	3	0	6	2	1	4	2	7	3	0	k__Bacteria; p__Firmicutes; c__Clostridia; o__Clostridiales; f__Lachnospiraceae; g__Lachnospiraceae ND3007 group; s__uncultured rumen bacterium
OTU_362	3	7	34	7	83	41	6	7	12	28	18	11	14	25	20	7	3	3	k__Bacteria; p__Bacteroidetes; c__Bacteroidia; o__Bacteroidales; f__Prevotellaceae
OTU_523	6	4	8	16	11	11	7	3	5	1	10	6	11	3	6	8	16	4	k__Bacteria; p__Bacteroidetes; c__Bacteroidia; o__Bacteroidales; f__Prevotellaceae; g__Prevotellaceae UCG-003
OTU_5694	5	3	1	8	0	1	0	4	1	4	7	2	1	1	6	1	0	0	k__Bacteria; p__Firmicutes; c__Clostridia; o__Clostridiales; f__Lachnospiraceae
OTU_10431	1	0	1	2	1	3	0	0	1	0	2	0	1	0	3	1	1	3	k__Bacteria; p__Firmicutes; c__Clostridia; o__Clostridiales; f__Christensenellaceae; g__Christensenellaceae R-7 group; s__uncultured rumen bacterium
OTU_623	3	5	11	5	12	3	4	2	5	2	4	3	5	1	2	5	5	6	k__Bacteria; p__Bacteroidetes; c__Bacteroidia; o__Bacteroidales; f__Prevotellaceae; g__Prevotellaceae UCG-001
OTU_812	4	11	2	8	4	3	1	3	6	3	8	2	4	13	1	4	3	6	k__Bacteria; p__Bacteroidetes; c__Bacteroidia; o__Bacteroidales; f__Rikenellaceae; g__Rikenellaceae RC9 gut group
OTU_473	4	5	4	4	5	3	0	2	5	2	11	7	1	0	4	1	3	6	k__Bacteria; p__Firmicutes; c__Clostridia; o__Clostridiales; f__Ruminococcaceae; g__Ruminococcaceae UCG-005; s__metagenome
OTU_890	4	7	6	7	10	9	2	6	8	2	9	14	3	5	6	4	7	14	k__Bacteria; p__Firmicutes; c__Clostridia; o__Clostridiales; f__Lachnospiraceae; g__Oribacterium
OTU_475	9	23	14	28	5	39	72	22	0	13	9	26	40	14	29	18	9	3	k__Bacteria; p__Bacteroidetes; c__Bacteroidia; o__Bacteroidales
OTU_315	11	21	14	15	85	14	11	21	33	3	15	13	37	30	36	75	81	88	k__Bacteria; p__Firmicutes; c__Clostridia; o__Clostridiales; f__Lachnospiraceae; g__Lachnospiraceae NK3A20 group; s__uncultured rumen bacterium
OTU_1440	2	0	0	0	3	0	0	0	0	0	0	2	0	0	4	0	1	0	k__Bacteria; p__Firmicutes; c__Clostridia; o__Clostridiales; f__Clostridiales vadinBB60 group; g__uncultured rumen bacterium; s__uncultured rumen bacterium
OTU_1688	5	3	1	5	3	4	2	3	1	0	1	3	0	0	0	1	0	1	k__Bacteria; p__Firmicutes; c__Clostridia; o__Clostridiales; f__Lachnospiraceae; g__Butyrivibrio 2; s__uncultured rumen bacterium
OTU_795	6	4	7	8	15	8	5	5	7	3	6	2	7	1	9	18	11	4	k__Bacteria; p__Firmicutes; c__Clostridia; o__Clostridiales; f__Lachnospiraceae; g__Lachnospiraceae NK3A20 group; s__uncultured bacterium
OTU_6363	5	15	2	5	0	4	7	20	0	9	2	6	8	8	2	0	1	0	k__Bacteria; p__Firmicutes; c__Clostridia; o__Clostridiales; f__Lachnospiraceae
OTU_1540	1	0	2	0	0	0	0	0	2	1	2	1	0	1	0	0	1	1	k__Bacteria; p__Firmicutes; c__Clostridia; o__Clostridiales; f__Ruminococcaceae
OTU_1036	3	5	2	6	0	4	2	1	2	1	6	3	3	0	2	7	2	0	k__Bacteria; p__Bacteroidetes; c__Bacteroidia; o__Bacteroidales; f__Prevotellaceae; g__Prevotella 1
OTU_218	8	17	1	16	6	4	0	0	27	4	1	5	11	4	4	10	4	14	k__Bacteria; p__Firmicutes; c__Clostridia; o__Clostridiales; f__Lachnospiraceae; g__Acetitomaculum; s__uncultured rumen bacterium
OTU_248	11	24	6	19	17	10	2	3	53	5	18	13	10	11	6	17	18	37	k__Bacteria; p__Firmicutes; c__Clostridia; o__Clostridiales; f__Christensenellaceae; g__Christensenellaceae R-7 group; s__uncultured bacterium
OTU_978	1	2	5	4	1	3	0	3	0	2	4	0	1	0	2	5	0	0	k__Bacteria; p__Tenericutes; c__Mollicutes; o__Mollicutes RF39
OTU_2780	1	3	3	1	0	1	2	2	0	2	1	1	0	5	2	5	0	0	k__Bacteria; p__Bacteroidetes; c__Bacteroidia; o__Bacteroidales; f__Prevotellaceae; g__Prevotella 1; s__uncultured rumen bacterium
OTU_1341	8	4	3	2	1	4	3	4	1	5	1	4	1	1	0	2	1	5	k__Bacteria; p__Firmicutes; c__Clostridia; o__Clostridiales; f__Family XIII; g__[Eubacterium] nodatum group; s__uncultured rumen bacterium
OTU_608	5	0	1	1	14	7	5	3	0	5	6	5	14	12	2	11	7	3	k__Bacteria; p__Bacteroidetes; c__Bacteroidia; o__Bacteroidales; f__Muribaculaceae
OTU_1377	1	0	4	0	7	1	0	0	0	0	0	6	1	2	9	1	0	0	k__Bacteria; p__Firmicutes; c__Clostridia; o__Clostridiales; f__Ruminococcaceae; g__Ruminococcaceae UCG-014; s__uncultured bacterium
OTU_776	2	5	0	3	9	5	0	0	2	1	3	0	0	2	0	2	1	7	k__Bacteria; p__Firmicutes; c__Clostridia; o__Clostridiales; f__Ruminococcaceae; g__uncultured; s__uncultured rumen bacterium
OTU_8107	3	2	2	2	4	2	10	11	1	6	3	7	2	4	3	5	17	0	k__Bacteria; p__Firmicutes; c__Clostridia; o__Clostridiales; f__Ruminococcaceae; g__Ruminococcaceae UCG-014
OTU_6589	1	0	0	0	0	1	1	0	0	0	0	0	0	1	0	0	0	3	k__Bacteria; p__Firmicutes; c__Clostridia; o__Clostridiales; f__Ruminococcaceae; g__Ruminococcaceae NK4A214 group
OTU_1689	2	0	1	2	0	5	0	0	0	0	0	3	1	4	0	1	0	0	k__Bacteria; p__Bacteroidetes; c__Bacteroidia; o__Bacteroidales; f__Prevotellaceae; g__Prevotellaceae UCG-003; s__uncultured rumen bacterium
OTU_711	9	5	4	8	6	10	2	3	17	1	4	5	7	5	3	5	4	17	k__Bacteria; p__Firmicutes; c__Clostridia; o__Clostridiales; f__Lachnospiraceae; g__Acetitomaculum; s__uncultured rumen bacterium
OTU_9375	4	1	0	1	1	0	0	0	0	2	2	0	1	1	0	0	0	4	k__Bacteria; p__Tenericutes; c__Mollicutes; o__Mollicutes RF39
OTU_3780	1	0	0	0	0	0	0	0	1	0	0	0	1	0	0	0	0	1	k__Bacteria; p__Firmicutes; c__Erysipelotrichia; o__Erysipelotrichales; f__Erysipelotrichaceae; g__uncultured
OTU_684	10	3	1	2	0	0	1	11	3	1	0	3	1	0	4	1	2	1	k__Bacteria; p__Tenericutes; c__Mollicutes; o__Mollicutes RF39
OTU_579	5	2	14	3	2	8	2	9	2	5	6	2	6	4	6	15	17	7	k__Bacteria; p__Bacteroidetes; c__Bacteroidia; o__Bacteroidales; f__Prevotellaceae; g__Prevotellaceae UCG-001; s__uncultured bacterium
OTU_1507	0	2	0	1	0	0	0	0	1	0	0	0	1	3	0	7	0	2	k__Bacteria; p__Firmicutes; c__Clostridia; o__Clostridiales; f__Lachnospiraceae; g__Butyrivibrio 2; s__uncultured rumen bacterium
OTU_928	6	1	4	6	4	6	4	2	2	4	5	9	7	1	6	2	3	4	k__Bacteria; p__Bacteroidetes; c__Bacteroidia; o__Bacteroidales; f__uncultured; g__uncultured bacterium; s__uncultured bacterium
OTU_11122	3	3	0	0	0	0	0	0	0	0	0	0	0	0	0	0	1	0	k__Bacteria; p__Firmicutes; c__Clostridia; o__Clostridiales; f__Lachnospiraceae
OTU_1526	5	2	5	4	4	0	1	6	0	0	1	0	2	0	3	4	2	1	k__Bacteria; p__Firmicutes; c__Clostridia; o__Clostridiales; f__Ruminococcaceae; g__Ruminococcaceae UCG-014; s__uncultured bacterium
OTU_693	13	12	9	6	2	2	3	5	2	6	4	7	15	4	1	3	3	2	k__Bacteria; p__Cyanobacteria; c__Oxyphotobacteria; o__Chloroplast
OTU_614	10	5	10	9	2	2	4	6	11	11	13	5	3	8	7	5	6	16	k__Bacteria; p__Firmicutes; c__Clostridia; o__Clostridiales; f__Lachnospiraceae
OTU_1796	7	10	14	15	13	4	4	10	25	8	16	16	21	20	5	5	18	7	k__Bacteria; p__Firmicutes; c__Clostridia; o__Clostridiales; f__Ruminococcaceae; g__Ruminococcus 1; s__uncultured rumen bacterium
OTU_419	2	10	13	10	8	11	17	7	3	5	12	3	12	8	14	7	10	8	k__Bacteria; p__Firmicutes; c__Clostridia; o__Clostridiales; f__Ruminococcaceae; g__[Eubacterium] coprostanoligenes group; s__uncultured bacterium
OTU_1641	3	0	1	3	0	2	0	0	4	2	1	0	1	0	0	0	0	1	k__Bacteria; p__Bacteroidetes; c__Bacteroidia; o__Bacteroidales; f__Rikenellaceae; g__Rikenellaceae RC9 gut group; s__uncultured bacterium
OTU_952	11	6	11	16	18	19	4	5	8	4	10	9	10	8	9	4	8	10	k__Bacteria; p__Bacteroidetes; c__Bacteroidia; o__Bacteroidales; f__uncultured; g__uncultured bacterium; s__uncultured bacterium
OTU_1280	2	0	0	3	0	1	0	0	0	3	0	0	0	0	1	0	0	2	k__Bacteria; p__Tenericutes; c__Mollicutes; o__Mollicutes RF39
OTU_11094	1	0	1	0	0	0	0	1	2	0	0	0	1	0	0	0	1	0	k__Bacteria; p__Firmicutes; c__Clostridia; o__Clostridiales; f__Lachnospiraceae; g__[Ruminococcus] gauvreauii group; s__uncultured rumen bacterium
OTU_814	8	5	2	9	11	2	1	0	0	1	1	3	3	10	5	0	0	0	k__Bacteria; p__Firmicutes; c__Clostridia; o__Clostridiales; f__Lachnospiraceae; g__FD2005; s__uncultured bacterium
OTU_210	4	7	13	4	25	4	9	5	0	0	6	5	2	9	17	44	13	2	k__Bacteria; p__Firmicutes; c__Clostridia; o__Clostridiales; f__Christensenellaceae; g__Christensenellaceae R-7 group
OTU_503	9	4	17	13	12	10	0	5	15	4	16	4	7	12	16	8	7	11	k__Bacteria; p__Firmicutes; c__Clostridia; o__Clostridiales; f__Lachnospiraceae; g__uncultured; s__uncultured rumen bacterium
OTU_1448	13	2	1	3	7	9	2	3	0	10	8	3	6	1	1	1	0	0	k__Bacteria; p__Firmicutes; c__Clostridia; o__Clostridiales; f__Ruminococcaceae; g__Ruminococcus 1; s__Ruminococcus sp. UNK.MGS-30
OTU_411	11	13	14	51	15	23	8	4	40	7	10	7	23	2	12	5	11	27	k__Bacteria; p__Spirochaetes; c__Spirochaetia; o__Spirochaetales; f__Spirochaetaceae; g__Treponema 2; s__uncultured rumen bacterium
OTU_804	3	0	5	4	0	1	1	1	3	0	5	6	12	1	1	0	1	1	k__Bacteria; p__Bacteroidetes; c__Bacteroidia; o__Bacteroidales; f__Prevotellaceae; g__Prevotellaceae UCG-001; s__uncultured rumen bacterium
OTU_15	16	2	213	114	315	221	100	118	261	76	184	63	334	316	114	328	436	593	k__Bacteria; p__Firmicutes; c__Clostridia; o__Clostridiales; f__Ruminococcaceae; g__Ruminococcaceae NK4A214 group; s__uncultured bacterium
OTU_532	7	15	4	33	14	41	8	5	2	10	11	19	14	8	3	2	1	1	k__Bacteria; p__Firmicutes; c__Clostridia; o__Clostridiales; f__Lachnospiraceae; g__[Eubacterium] xylanophilum group; s__uncultured rumen bacterium
OTU_1187	2	0	8	0	0	2	1	0	0	0	0	0	1	0	0	2	1	4	k__Bacteria; p__Kiritimatiellaeota; c__Kiritimatiellae; o__WCHB1-41; f__uncultured rumen bacterium; g__uncultured rumen bacterium; s__uncultured rumen bacterium
OTU_1636	3	0	1	0	0	0	0	0	0	1	0	0	0	0	0	2	0	0	k__Bacteria; p__Tenericutes; c__Mollicutes; o__Anaeroplasmatales; f__Anaeroplasmataceae; g__Anaeroplasma; s__uncultured bacterium
OTU_2059	3	9	6	0	2	1	5	5	1	4	3	7	3	3	9	4	2	1	k__Bacteria; p__Bacteroidetes; c__Bacteroidia; o__Bacteroidales; f__Prevotellaceae; g__Prevotella 1
OTU_401	1	2	2	8	7	20	5	9	3	2	2	8	5	7	4	3	3	3	k__Bacteria; p__Firmicutes; c__Erysipelotrichia; o__Erysipelotrichales; f__Erysipelotrichaceae; g__Erysipelotrichaceae UCG-004; s__unidentified rumen bacterium RFN74
OTU_2150	2	0	0	2	0	0	2	0	2	0	1	0	0	0	1	1	0	3	k__Bacteria; p__Firmicutes; c__Clostridia; o__Clostridiales; f__Ruminococcaceae; g__Ruminococcaceae UCG-014; s__uncultured rumen bacterium
OTU_377	1	4	1	5	6	21	15	7	5	2	6	1	5	4	2	7	2	12	k__Bacteria; p__Bacteroidetes; c__Bacteroidia; o__Bacteroidales; f__F082
OTU_1242	0	0	0	1	0	3	0	3	3	0	2	3	2	1	0	0	1	0	k__Bacteria; p__Bacteroidetes; c__Bacteroidia; o__Bacteroidales; f__Prevotellaceae
OTU_6126	2	3	0	0	0	1	0	1	0	0	1	0	0	0	0	0	0	0	k__Bacteria; p__Firmicutes; c__Clostridia; o__Clostridiales; f__Lachnospiraceae; g__Shuttleworthia
OTU_7527	4	11	0	0	0	0	0	0	7	0	0	0	0	0	0	0	0	0	k__Bacteria; p__Firmicutes; c__Clostridia; o__Clostridiales; f__Lachnospiraceae
OTU_4979	1	0	0	0	0	0	1	0	0	1	2	2	0	0	0	5	0	3	k__Bacteria; p__Firmicutes; c__Clostridia; o__Clostridiales; f__Ruminococcaceae; g__Ruminococcus 2
OTU_1010	2	0	7	7	5	3	0	3	5	3	21	4	9	4	5	8	0	13	k__Bacteria; p__Tenericutes; c__Mollicutes; o__Mollicutes RF39
OTU_1175	1	2	2	7	4	8	4	1	0	4	2	0	0	1	4	5	4	5	k__Bacteria; p__Firmicutes; c__Erysipelotrichia; o__Erysipelotrichales; f__Erysipelotrichaceae; g__Erysipelotrichaceae UCG-004; s__uncultured rumen bacterium
OTU_3371	2	0	8	5	8	8	1	2	8	4	6	3	16	15	7	16	21	61	k__Bacteria; p__Firmicutes; c__Clostridia; o__Clostridiales; f__Christensenellaceae; g__Christensenellaceae R-7 group; s__uncultured rumen bacterium
OTU_1566	2	0	0	1	2	1	0	0	2	0	0	0	0	1	1	0	0	3	k__Bacteria; p__Firmicutes; c__Clostridia; o__Clostridiales; f__Lachnospiraceae
OTU_10903	8	9	11	10	14	5	12	6	6	8	3	8	4	13	9	10	2	5	k__Bacteria; p__Bacteroidetes; c__Bacteroidia; o__Bacteroidales; f__Prevotellaceae; g__Prevotella 1; s__uncultured rumen bacterium
OTU_1447	0	1	3	1	1	2	1	3	0	1	0	1	1	0	2	0	0	1	k__Bacteria; p__Firmicutes; c__Clostridia; o__Clostridiales; f__Lachnospiraceae
OTU_198	9	21	17	28	36	10	19	14	11	5	28	7	15	49	31	19	49	43	k__Bacteria; p__Bacteroidetes; c__Bacteroidia; o__Bacteroidales; f__Rikenellaceae; g__Rikenellaceae RC9 gut group; s__uncultured rumen bacterium
OTU_5861	2	0	0	0	0	0	0	0	0	0	0	0	2	0	0	0	0	0	k__Bacteria; p__Bacteroidetes; c__Bacteroidia; o__Bacteroidales; f__Rikenellaceae; g__Rikenellaceae RC9 gut group
OTU_936	3	9	5	1	3	4	17	2	0	3	12	2	2	5	3	3	0	0	k__Bacteria; p__Synergistetes; c__Synergistia; o__Synergistales; f__Synergistaceae; g__Pyramidobacter; s__uncultured rumen bacterium
OTU_1328	6	18	25	5	11	16	30	15	16	15	17	12	11	39	16	16	20	14	k__Bacteria; p__Bacteroidetes; c__Bacteroidia; o__Bacteroidales; f__Prevotellaceae; g__Prevotella 1; s__uncultured bacterium
OTU_954	3	0	9	11	17	3	0	0	2	1	6	0	14	0	2	5	8	8	k__Bacteria; p__Firmicutes; c__Clostridia; o__Clostridiales; f__Lachnospiraceae; g__Eisenbergiella; s__uncultured bacterium
OTU_2884	4	5	5	6	0	8	3	3	9	12	7	7	2	5	8	2	0	0	k__Bacteria; p__Bacteroidetes; c__Bacteroidia; o__Bacteroidales; f__Prevotellaceae; g__Prevotella 7
OTU_9251	2	3	0	1	0	0	0	1	1	1	0	3	1	0	0	0	0	2	k__Bacteria; p__Firmicutes; c__Clostridia; o__Clostridiales; f__Lachnospiraceae; g__Lachnospiraceae NK3A20 group
OTU_405	6	39	10	17	5	9	18	5	13	6	16	9	16	9	5	5	1	2	k__Bacteria; p__Bacteroidetes; c__Bacteroidia; o__Bacteroidales; f__Prevotellaceae; g__Prevotella 1
OTU_457	22	7	16	2	17	17	6	7	2	17	12	9	4	16	4	2	3	0	k__Bacteria; p__Firmicutes; c__Clostridia; o__Clostridiales; f__Lachnospiraceae; g__[Eubacterium] ruminantium group
OTU_8861	1	0	0	0	0	0	0	0	0	0	0	0	0	0	0	0	0	0	k__Bacteria; p__Bacteroidetes; c__Bacteroidia; o__Bacteroidales; f__Bacteroidaceae; g__Bacteroides
OTU_3169	1	1	0	0	0	0	0	0	0	1	2	2	0	0	0	0	0	0	k__Bacteria; p__Firmicutes; c__Clostridia; o__Clostridiales; f__Lachnospiraceae
OTU_1752	12	7	0	0	0	0	0	0	0	1	0	3	1	0	0	0	0	0	k__Bacteria; p__Firmicutes; c__Erysipelotrichia; o__Erysipelotrichales; f__Erysipelotrichaceae; g__Solobacterium; s__uncultured bacterium
OTU_2301	3	1	1	0	1	0	1	0	0	1	0	1	0	0	0	0	1	0	k__Bacteria; p__Firmicutes; c__Clostridia; o__Clostridiales; f__Ruminococcaceae; g__Ruminococcaceae UCG-010
OTU_3074	3	1	5	2	3	1	0	0	5	2	1	0	4	1	3	6	4	1	k__Bacteria; p__Firmicutes; c__Clostridia; o__Clostridiales; f__Lachnospiraceae; g__Butyrivibrio 2
OTU_695	3	5	2	5	1	5	1	0	7	2	5	2	2	1	0	3	6	27	k__Bacteria; p__Firmicutes; c__Clostridia; o__Clostridiales; f__Lachnospiraceae; g__Coprococcus 1
OTU_96	1	0	0	0	0	0	358	1	0	36	0	1	0	7	0	0	0	0	k__Bacteria; p__Firmicutes; c__Clostridia; o__Clostridiales; f__Family XIII; g__[Eubacterium] nodatum group; s__uncultured rumen bacterium
OTU_11098	1	3	0	3	0	3	2	3	3	3	0	2	3	4	6	1	1	0	k__Bacteria; p__Bacteroidetes; c__Bacteroidia; o__Bacteroidales; f__Prevotellaceae
OTU_499	8	8	15	11	8	12	13	12	3	1	14	16	20	11	9	5	11	5	k__Bacteria; p__Bacteroidetes; c__Bacteroidia; o__Bacteroidales; f__Prevotellaceae; g__Prevotella 1
OTU_1584	0	0	3	4	1	1	0	0	0	3	0	1	0	0	0	1	0	0	k__Bacteria; p__Tenericutes; c__Mollicutes; o__Mollicutes RF39; f__uncultured rumen bacterium; g__uncultured rumen bacterium; s__uncultured rumen bacterium
OTU_1911	1	0	1	0	1	0	0	2	0	0	1	0	0	0	3	1	0	0	k__Bacteria; p__Firmicutes; c__Clostridia; o__Clostridiales; f__Ruminococcaceae; g__Ruminococcaceae UCG-014; s__uncultured rumen bacterium
OTU_1009	6	9	47	13	12	18	5	8	13	19	9	9	8	8	10	1	2	2	k__Bacteria; p__Bacteroidetes; c__Bacteroidia; o__Bacteroidales; f__Prevotellaceae; g__Prevotella 1; s__uncultured rumen bacterium
OTU_708	1	0	4	3	0	11	1	0	0	3	3	3	4	1	0	0	1	0	k__Bacteria; p__Firmicutes; c__Clostridia; o__Clostridiales; f__Ruminococcaceae; g__Ruminococcus 1
OTU_6299	16	28	0	10	2	0	0	1	13	3	6	7	5	0	2	3	1	4	k__Bacteria; p__Firmicutes; c__Clostridia; o__Clostridiales; f__Lachnospiraceae; g__Lachnospiraceae NK3A20 group; s__uncultured bacterium
OTU_1136	3	0	2	1	2	0	1	0	0	7	2	4	0	5	3	1	6	0	k__Bacteria; p__Firmicutes; c__Clostridia; o__Clostridiales; f__Ruminococcaceae; g__Ruminococcaceae UCG-014; s__uncultured bacterium
OTU_9702	3	1	0	2	0	0	0	2	0	0	3	2	0	0	0	0	0	1	k__Bacteria; p__Firmicutes; c__Clostridia; o__Clostridiales; f__Ruminococcaceae; g__Saccharofermentans; s__uncultured rumen bacterium
OTU_994	1	0	1	21	4	3	1	0	1	0	0	0	3	0	0	0	1	0	k__Bacteria; p__Firmicutes; c__Clostridia; o__Clostridiales; f__Ruminococcaceae; g__Flavonifractor; s__uncultured bacterium
OTU_1468	0	0	0	2	0	0	0	0	2	0	1	0	0	0	0	0	2	4	k__Bacteria; p__Actinobacteria; c__Coriobacteriia; o__Coriobacteriales; f__uncultured; g__uncultured Coriobacteriaceae bacterium; s__uncultured Coriobacteriaceae bacterium
OTU_788	6	4	1	1	2	0	5	3	1	1	2	5	0	9	5	6	2	1	k__Bacteria; p__Firmicutes; c__Bacilli; o__Lactobacillales; f__Lactobacillaceae; g__Lactobacillus; s__Lactobacillus mucosae
OTU_3421	1	0	0	2	0	0	0	0	9	1	0	0	1	0	1	1	3	7	k__Bacteria; p__Firmicutes; c__Clostridia; o__Clostridiales; f__Lachnospiraceae; g__Marvinbryantia; s__uncultured rumen bacterium
OTU_1632	1	0	0	1	1	0	0	0	0	0	2	0	4	0	0	0	0	3	k__Bacteria; p__Firmicutes; c__Clostridia; o__Clostridiales; f__Lachnospiraceae; g__Lachnospiraceae NK3A20 group; s__uncultured rumen bacterium
OTU_3459	0	2	0	1	0	0	0	0	3	0	0	3	1	0	1	1	0	1	k__Bacteria; p__Firmicutes; c__Clostridia; o__Clostridiales; f__Lachnospiraceae; g__Lachnospiraceae NK3A20 group
OTU_1803	1	0	0	2	0	2	1	0	3	1	3	0	4	0	0	1	0	2	k__Bacteria; p__Bacteroidetes; c__Bacteroidia; o__Bacteroidales; f__Rikenellaceae; g__U29-B03; s__uncultured rumen bacterium
OTU_1782	0	0	0	1	1	0	0	3	0	0	0	0	0	2	1	0	1	0	k__Bacteria; p__Firmicutes; c__Clostridia; o__Clostridiales; f__Lachnospiraceae; g__Oribacterium; s__uncultured bacterium
OTU_3392	2	5	0	4	0	3	17	5	0	10	9	3	6	5	0	0	3	0	k__Bacteria; p__Firmicutes; c__Clostridia; o__Clostridiales; f__Ruminococcaceae; g__[Eubacterium] coprostanoligenes group; s__uncultured bacterium
OTU_4869	1	0	0	0	1	0	0	0	0	0	0	0	0	1	3	0	0	0	k__Bacteria; p__Patescibacteria; c__Saccharimonadia; o__Saccharimonadales; f__Saccharimonadaceae; g__Candidatus Saccharimonas
OTU_878	2	3	2	4	2	4	4	1	1	1	4	2	3	6	4	5	2	2	k__Bacteria; p__Firmicutes; c__Clostridia; o__Clostridiales; f__Ruminococcaceae
OTU_295	2	4	41	4	10	53	11	13	13	14	22	6	3	4	18	20	10	3	k__Bacteria; p__Bacteroidetes; c__Bacteroidia; o__Bacteroidales; f__Prevotellaceae
OTU_10650	4	1	0	2	0	1	10	7	1	7	1	3	0	0	1	0	3	0	k__Bacteria; p__Firmicutes; c__Clostridia; o__Clostridiales; f__Lachnospiraceae
OTU_351	1	0	0	12	13	7	4	0	2	5	14	1	1	8	9	5	13	6	k__Bacteria; p__Bacteroidetes; c__Bacteroidia; o__Bacteroidales; f__Bacteroidales RF16 group
OTU_519	6	4	3	12	5	5	1	0	3	4	0	3	0	3	3	5	4	8	k__Bacteria; p__Firmicutes; c__Erysipelotrichia; o__Erysipelotrichales; f__Erysipelotrichaceae; g__Erysipelotrichaceae UCG-004
OTU_61	1	0	0	1	0	0	0	0	0	0	0	0	1	1	0	0	0	0	k__Bacteria; p__Firmicutes; c__Clostridia; o__Clostridiales; f__Ruminococcaceae; g__Ruminococcaceae UCG-005; s__uncultured bacterium
OTU_1900	10	4	2	5	14	9	3	10	5	13	18	14	10	15	10	3	17	6	k__Bacteria; p__Firmicutes; c__Clostridia; o__Clostridiales; f__Lachnospiraceae
OTU_6418	1	2	6	3	1	6	2	9	3	4	3	2	1	13	5	14	5	1	k__Bacteria; p__Bacteroidetes; c__Bacteroidia; o__Bacteroidales; f__Prevotellaceae; g__Prevotella 1; s__uncultured rumen bacterium
OTU_272	4	3	16	7	12	18	1	7	21	0	17	1	14	19	5	15	31	48	k__Bacteria; p__Firmicutes; c__Clostridia; o__Clostridiales; f__Christensenellaceae; g__Christensenellaceae R-7 group
OTU_448	2	0	13	4	11	23	1	1	12	0	11	7	16	7	5	5	13	13	k__Bacteria; p__Fibrobacteres; c__Fibrobacteria; o__Fibrobacterales; f__Fibrobacteraceae; g__Fibrobacter; s__Fibrobacter sp. UWCM
OTU_2441	4	1	1	3	4	6	2	1	0	20	15	4	2	4	8	4	0	3	k__Bacteria; p__Firmicutes; c__Clostridia; o__Clostridiales; f__Ruminococcaceae; g__Ruminococcaceae UCG-014; s__uncultured Ruminococcaceae bacterium
OTU_1232	6	0	0	0	1	0	0	0	1	0	0	0	0	0	0	0	0	0	k__Bacteria; p__Proteobacteria; c__Gammaproteobacteria; o__Pseudomonadales; f__Moraxellaceae; g__Acinetobacter; s__Acinetobacter lwoffii
OTU_317	1	0	29	2	50	2	0	0	1	3	15	1	28	9	19	28	68	148	k__Bacteria; p__Firmicutes; c__Clostridia; o__Clostridiales; f__Christensenellaceae; g__Christensenellaceae R-7 group; s__uncultured rumen bacterium
OTU_827	2	0	5	1	4	1	0	0	16	0	7	1	3	6	1	7	4	13	k__Bacteria; p__Firmicutes; c__Clostridia; o__Clostridiales; f__Lachnospiraceae; g__Syntrophococcus; s__uncultured rumen bacterium
OTU_4987	3	1	0	1	0	0	0	0	0	0	0	0	1	0	0	0	0	0	k__Bacteria; p__Firmicutes; c__Clostridia; o__Clostridiales; f__Lachnospiraceae; g__Syntrophococcus; s__uncultured bacterium
OTU_1122	3	0	0	0	0	0	0	2	0	0	2	2	2	1	1	2	2	0	k__Bacteria; p__Patescibacteria; c__Saccharimonadia; o__Saccharimonadales; f__Saccharimonadaceae; g__Candidatus Saccharimonas
OTU_2444	5	7	11	8	18	16	5	5	13	4	8	0	4	16	15	6	6	11	k__Bacteria; p__Firmicutes; c__Clostridia; o__Clostridiales; f__Ruminococcaceae; g__Ruminococcaceae UCG-005; s__uncultured rumen bacterium
OTU_492	1	1	1	1	6	13	1	2	6	2	9	3	12	6	20	21	34	26	k__Bacteria; p__Firmicutes; c__Clostridia; o__Clostridiales; f__Lachnospiraceae; g__Moryella; s__uncultured rumen bacterium
OTU_3643	2	1	3	2	1	5	4	0	3	0	3	0	0	1	1	0	0	1	k__Bacteria; p__Bacteroidetes; c__Bacteroidia; o__Bacteroidales; f__Prevotellaceae; g__Prevotella 1; s__uncultured rumen bacterium
OTU_145	16	17	79	41	160	26	25	14	21	11	87	11	67	17	45	69	92	262	k__Bacteria; p__Firmicutes; c__Clostridia; o__Clostridiales; f__Ruminococcaceae; g__Ruminococcus 2
OTU_1204	0	0	2	2	0	4	3	0	0	0	0	2	0	1	1	3	0	0	k__Bacteria; p__Bacteroidetes; c__Bacteroidia; o__Bacteroidales; f__Prevotellaceae
OTU_7532	1	2	2	3	0	0	0	1	2	0	1	2	1	0	4	0	1	3	k__Bacteria; p__Tenericutes; c__Mollicutes; o__Mollicutes RF39; f__uncultured bacterium; g__uncultured bacterium; s__uncultured bacterium
OTU_1568	1	0	1	0	0	1	2	0	0	1	2	4	1	0	2	0	0	0	k__Bacteria; p__Bacteroidetes; c__Bacteroidia; o__Bacteroidales; f__Prevotellaceae; g__Prevotella 1
OTU_3156	1	1	2	2	5	4	0	2	18	0	3	3	5	4	3	10	10	17	k__Bacteria; p__Firmicutes; c__Clostridia; o__Clostridiales; f__Christensenellaceae; g__Christensenellaceae R-7 group; s__uncultured bacterium
OTU_1886	0	0	0	2	0	0	0	0	1	1	0	0	1	0	0	0	0	1	k__Bacteria; p__Spirochaetes; c__Spirochaetia; o__Spirochaetales; f__Spirochaetaceae; g__Treponema 2; s__uncultured rumen bacterium
OTU_3244	3	1	0	0	0	0	0	0	1	1	0	0	0	0	0	1	0	0	k__Bacteria; p__Tenericutes; c__Mollicutes; o__Mollicutes RF39
OTU_2661	0	0	8	3	8	3	0	0	13	0	9	2	2	0	0	2	1	13	k__Bacteria; p__Firmicutes; c__Clostridia; o__Clostridiales; f__Ruminococcaceae; g__CAG-352
OTU_1600	1	3	0	2	0	0	0	0	0	0	1	0	0	0	0	0	0	0	k__Bacteria; p__Tenericutes; c__Mollicutes; o__Mollicutes RF39; f__uncultured bacterium; g__uncultured bacterium; s__uncultured bacterium
OTU_263	11	15	1	23	12	9	15	4	14	3	6	7	11	7	9	5	13	3	k__Bacteria; p__Patescibacteria; c__Saccharimonadia; o__Saccharimonadales; f__Saccharimonadaceae; g__Candidatus Saccharimonas; s__uncultured bacterium
OTU_1152	1	0	1	0	0	0	1	5	0	0	2	1	3	1	2	0	0	0	k__Bacteria; p__Bacteroidetes; c__Bacteroidia; o__Bacteroidales; f__Prevotellaceae; g__Prevotellaceae UCG-001
OTU_1093	1	1	3	1	1	4	0	1	0	1	4	0	2	0	2	5	1	0	k__Bacteria; p__Firmicutes; c__Clostridia; o__Clostridiales; f__Lachnospiraceae; g__Tyzzerella; s__uncultured bacterium
OTU_2347	3	10	6	11	0	8	3	34	3	23	9	19	7	8	28	22	3	0	k__Bacteria; p__Bacteroidetes; c__Bacteroidia; o__Bacteroidales; f__Prevotellaceae; g__Prevotella 7; s__uncultured bacterium
OTU_10204	4	1	1	1	0	0	0	0	0	2	0	2	0	0	2	0	2	0	k__Bacteria; p__Firmicutes; c__Clostridia; o__Clostridiales; f__Lachnospiraceae
OTU_1657	2	2	0	0	0	0	5	2	1	0	1	0	1	0	0	0	0	0	k__Bacteria; p__Firmicutes; c__Clostridia; o__Clostridiales
OTU_2648	2	10	3	9	5	2	1	5	5	3	10	17	13	9	3	6	9	2	k__Bacteria; p__Firmicutes; c__Clostridia; o__Clostridiales; f__Ruminococcaceae; g__Ruminococcaceae UCG-014; s__uncultured bacterium
OTU_1112	2	2	2	3	4	5	4	6	2	2	0	3	5	3	1	1	3	1	k__Bacteria; p__Bacteroidetes; c__Bacteroidia; o__Bacteroidales; f__Rikenellaceae; g__Rikenellaceae RC9 gut group
OTU_1482	0	0	0	0	0	0	0	0	0	2	3	1	1	1	3	0	0	0	k__Bacteria; p__Firmicutes; c__Erysipelotrichia; o__Erysipelotrichales; f__Erysipelotrichaceae; g__Erysipelotrichaceae UCG-003; s__uncultured bacterium
OTU_2673	3	0	0	0	1	0	0	0	0	1	0	0	0	0	0	0	0	0	k__Bacteria; p__Firmicutes; c__Bacilli; o__Bacillales; f__Planococcaceae; g__Solibacillus; s__uncultured bacterium
OTU_1559	1	0	0	0	0	2	2	0	0	0	2	0	1	0	3	1	11	0	k__Bacteria; p__Bacteroidetes; c__Bacteroidia; o__Bacteroidales; f__Prevotellaceae; g__Prevotella 9; s__uncultured bacterium
OTU_1006	3	9	2	14	7	15	5	9	4	6	8	7	13	4	4	0	4	1	k__Bacteria; p__Firmicutes; c__Clostridia; o__Clostridiales; f__Ruminococcaceae; g__Ruminococcus 1; s__uncultured rumen bacterium
OTU_961	13	4	10	12	4	6	1	8	9	4	4	4	7	11	5	10	4	7	k__Bacteria; p__Firmicutes; c__Clostridia; o__Clostridiales; f__Lachnospiraceae; g__Syntrophococcus; s__uncultured rumen bacterium
OTU_1336	0	3	6	3	4	8	1	1	2	3	3	2	0	1	3	5	3	1	k__Bacteria; p__Bacteroidetes; c__Bacteroidia; o__Bacteroidales; f__Prevotellaceae; g__Prevotella 1; s__uncultured bacterium
OTU_5436	0	0	1	0	2	1	0	1	0	1	2	2	1	0	3	5	0	0	k__Bacteria; p__Bacteroidetes; c__Bacteroidia; o__Bacteroidales; f__Prevotellaceae; g__Prevotella 1
OTU_450	2	7	1	5	7	5	0	6	8	1	2	3	1	1	3	14	9	7	k__Bacteria; p__Firmicutes
OTU_6580	1	1	4	1	3	3	3	0	2	1	3	1	1	3	3	3	1	1	k__Bacteria; p__Bacteroidetes; c__Bacteroidia; o__Bacteroidales; f__Prevotellaceae; g__Prevotella 1
OTU_9629	6	3	3	1	0	3	10	5	2	12	1	8	0	11	6	16	10	0	k__Bacteria; p__Bacteroidetes; c__Bacteroidia; o__Bacteroidales; f__Prevotellaceae; g__Prevotella 7; s__uncultured bacterium
OTU_1246	2	0	4	2	2	0	0	0	2	1	0	1	2	0	2	1	4	0	k__Bacteria; p__Firmicutes; c__Clostridia; o__Clostridiales; f__Family XIII
OTU_1169	1	1	4	3	1	3	4	3	3	9	4	6	0	3	4	5	3	1	k__Bacteria; p__Bacteroidetes; c__Bacteroidia; o__Bacteroidales; f__Prevotellaceae; g__Prevotella 1
OTU_2007	0	5	0	0	0	2	0	0	0	1	0	0	0	0	1	0	1	0	k__Bacteria; p__Tenericutes; c__Mollicutes; o__Mollicutes RF39
OTU_907	4	0	8	3	4	6	0	5	15	0	2	1	3	4	0	3	4	7	k__Bacteria; p__Firmicutes; c__Clostridia; o__Clostridiales; f__Defluviitaleaceae; g__Defluviitaleaceae UCG-011; s__uncultured bacterium
OTU_383	4	26	7	7	6	7	5	4	8	6	2	12	14	11	3	9	6	9	k__Bacteria; p__Bacteroidetes; c__Bacteroidia; o__Bacteroidales; f__Rikenellaceae; g__Rikenellaceae RC9 gut group; s__uncultured rumen bacterium
OTU_459	12	22	43	25	23	49	28	28	19	15	30	26	18	1	20	17	2	1	k__Bacteria; p__Bacteroidetes; c__Bacteroidia; o__Bacteroidales; f__Prevotellaceae; g__Prevotella 1
OTU_571	4	1	16	9	37	14	3	2	38	4	7	0	9	4	20	24	40	46	k__Bacteria; p__Firmicutes; c__Clostridia; o__Clostridiales; f__Lachnospiraceae; g__Marvinbryantia; s__uncultured rumen bacterium
OTU_262	3	0	5	3	2	4	0	3	9	4	1	0	5	17	8	18	12	2	k__Bacteria; p__Bacteroidetes; c__Bacteroidia; o__Bacteroidales; f__Bacteroidales RF16 group; g__uncultured rumen bacterium; s__uncultured rumen bacterium
OTU_1079	1	5	7	18	26	34	5	3	12	12	12	8	25	6	3	2	0	1	k__Bacteria; p__Firmicutes; c__Clostridia; o__Clostridiales; f__Ruminococcaceae; g__Ruminococcus 1
OTU_864	3	8	4	5	3	19	6	3	3	2	3	4	2	1	1	4	9	1	k__Bacteria; p__Bacteroidetes; c__Bacteroidia; o__Bacteroidales; f__Prevotellaceae; g__Prevotellaceae UCG-004; s__uncultured rumen bacterium
OTU_1492	0	0	1	0	2	1	1	1	0	0	0	0	1	0	2	0	0	3	k__Bacteria; p__Bacteroidetes; c__Bacteroidia; o__Bacteroidales; f__Bacteroidaceae; g__Bacteroides
OTU_3798	0	3	3	0	0	1	3	3	4	0	0	2	0	0	1	0	2	0	k__Bacteria; p__Firmicutes; c__Clostridia; o__Clostridiales; f__Lachnospiraceae
OTU_5705	3	3	0	0	0	0	2	7	0	1	1	9	1	4	5	4	0	0	k__Bacteria; p__Bacteroidetes; c__Bacteroidia; o__Bacteroidales; f__Prevotellaceae; g__Prevotella 7; s__uncultured bacterium
OTU_1237	5	3	1	11	1	0	0	0	0	0	3	4	1	2	7	1	3	1	k__Bacteria; p__Tenericutes; c__Mollicutes; o__Mollicutes RF39
OTU_2050	1	0	0	0	0	1	0	0	0	0	0	0	0	1	0	1	0	0	k__Bacteria; p__Firmicutes; c__Clostridia; o__Clostridiales; f__Lachnospiraceae
OTU_8413	1	0	0	0	0	0	0	0	0	0	0	0	0	0	0	0	0	0	k__Bacteria; p__Firmicutes; c__Clostridia; o__Clostridiales
OTU_11091	1	0	0	0	0	0	0	0	0	0	0	0	0	0	0	0	0	0	k__Bacteria; p__Firmicutes
OTU_3450	1	0	0	1	1	0	0	0	0	0	0	0	2	1	0	2	1	0	k__Bacteria; p__Tenericutes; c__Mollicutes; o__Mollicutes RF39; f__uncultured bacterium; g__uncultured bacterium; s__uncultured bacterium
OTU_5598	2	1	0	0	0	0	0	0	2	0	0	0	0	0	0	1	0	1	k__Bacteria; p__Firmicutes; c__Clostridia; o__Clostridiales; f__Lachnospiraceae; g__Acetitomaculum; s__uncultured rumen bacterium
OTU_2379	1	0	2	3	0	0	2	0	0	0	0	1	0	0	1	3	3	0	k__Bacteria; p__Bacteroidetes; c__Bacteroidia; o__Bacteroidales; f__Prevotellaceae
OTU_611	3	11	3	5	5	12	6	3	3	3	9	2	3	7	6	9	4	7	k__Bacteria; p__Bacteroidetes; c__Bacteroidia; o__Bacteroidales; f__Rikenellaceae; g__Rikenellaceae RC9 gut group; s__uncultured rumen bacterium
OTU_655	10	14	8	20	4	8	7	6	11	6	17	3	4	0	5	6	5	17	k__Bacteria; p__Tenericutes; c__Mollicutes; o__Mollicutes RF39
OTU_2468	1	2	1	3	2	1	1	2	1	0	2	1	3	0	4	0	1	0	k__Bacteria; p__Firmicutes; c__Clostridia; o__Clostridiales; f__Lachnospiraceae; g__Anaerostipes; s__uncultured rumen bacterium
OTU_1052	1	1	0	0	0	1	1	3	0	2	0	0	1	4	1	1	0	3	k__Bacteria; p__Firmicutes; c__Clostridia; o__Clostridiales; f__Family XIII; g__Anaerovorax; s__uncultured rumen bacterium
OTU_10880	4	3	2	5	3	6	4	4	2	2	6	3	13	25	9	12	22	26	k__Bacteria; p__Firmicutes; c__Clostridia; o__Clostridiales; f__Ruminococcaceae; g__Ruminococcaceae NK4A214 group
OTU_1525	2	0	0	0	0	0	0	0	0	0	0	0	0	0	0	0	0	0	k__Bacteria; p__Firmicutes; c__Clostridia; o__Clostridiales; f__Ruminococcaceae; g__Ruminococcaceae UCG-013; s__uncultured bacterium
OTU_1277	0	0	0	0	0	0	0	0	0	0	0	0	0	0	0	0	0	0	k__Bacteria; p__Firmicutes; c__Clostridia; o__Clostridiales; f__Ruminococcaceae; g__Ruminococcus 1
OTU_1412	0	0	3	2	4	1	0	2	2	0	0	0	1	0	1	3	6	1	k__Bacteria; p__Bacteroidetes; c__Bacteroidia; o__Bacteroidales; f__Prevotellaceae; g__Prevotellaceae NK3B31 group; s__uncultured rumen bacterium
OTU_2028	2	0	0	2	0	0	0	0	0	0	0	0	2	0	1	0	0	0	k__Bacteria; p__Tenericutes; c__Mollicutes; o__Mollicutes RF39; f__uncultured bacterium; g__uncultured bacterium; s__uncultured bacterium
OTU_1881	1	0	5	0	2	0	0	0	0	2	0	0	0	0	0	0	0	1	k__Bacteria; p__Cyanobacteria; c__Melainabacteria; o__Gastranaerophilales
OTU_2275	4	0	15	3	13	9	50	8	0	17	13	7	10	1	16	15	0	0	k__Bacteria; p__Bacteroidetes; c__Bacteroidia; o__Bacteroidales; f__Muribaculaceae; g__uncultured rumen bacterium; s__uncultured rumen bacterium
OTU_3972	0	0	1	0	3	0	2	3	1	2	1	4	0	2	0	2	2	0	k__Bacteria; p__Firmicutes; c__Clostridia; o__Clostridiales
OTU_6022	1	0	0	0	4	0	0	0	4	1	0	0	1	0	1	0	0	2	k__Bacteria; p__Firmicutes; c__Clostridia; o__Clostridiales; f__Lachnospiraceae
OTU_509	8	5	7	5	5	23	11	13	4	4	10	2	2	14	10	7	7	5	k__Bacteria; p__Bacteroidetes; c__Bacteroidia; o__Bacteroidales; f__Rikenellaceae; g__Rikenellaceae RC9 gut group
OTU_887	1	0	4	1	5	0	0	0	4	0	2	0	0	0	1	4	6	3	k__Bacteria; p__Firmicutes; c__Clostridia; o__Clostridiales; f__Lachnospiraceae; g__Coprococcus 1; s__uncultured rumen bacterium
OTU_4587	0	0	1	0	0	1	0	2	0	0	0	0	0	0	0	0	0	0	k__Bacteria; p__Bacteroidetes; c__Bacteroidia; o__Bacteroidales; f__Prevotellaceae
OTU_1451	0	0	1	3	4	2	2	1	5	0	1	1	3	0	0	0	3	1	k__Bacteria; p__Fibrobacteres; c__Fibrobacteria; o__Fibrobacterales; f__Fibrobacteraceae; g__Fibrobacter; s__uncultured rumen bacterium
OTU_469	1	11	7	6	11	11	13	2	6	10	9	7	3	26	8	6	4	10	k__Bacteria; p__Firmicutes; c__Clostridia; o__Clostridiales; f__Christensenellaceae; g__Christensenellaceae R-7 group
OTU_3585	1	3	1	1	2	1	1	0	4	1	1	0	1	1	0	0	1	0	k__Bacteria; p__Firmicutes; c__Clostridia; o__Clostridiales; f__Lachnospiraceae; g__Lachnospiraceae UCG-002; s__uncultured rumen bacterium
OTU_10286	0	0	0	0	0	1	1	1	0	0	0	0	0	0	0	0	0	0	k__Bacteria; p__Bacteroidetes; c__Bacteroidia; o__Bacteroidales; f__Bacteroidaceae; g__Bacteroides; s__Bacteroides ovatus V975
OTU_2136	2	0	0	0	1	0	0	0	2	0	0	0	0	0	0	0	0	1	k__Bacteria; p__Firmicutes; c__Clostridia; o__Clostridiales; f__Lachnospiraceae; g__Acetitomaculum
OTU_653	1	0	21	2	5	9	8	3	0	4	7	4	2	5	6	43	6	3	k__Bacteria; p__Bacteroidetes; c__Bacteroidia; o__Bacteroidales; f__Prevotellaceae
OTU_722	4	6	3	5	0	9	4	5	1	3	8	5	1	2	5	2	1	2	k__Bacteria; p__Firmicutes; c__Clostridia; o__Clostridiales; f__Ruminococcaceae; g__Ruminococcaceae UCG-009; s__uncultured bacterium
OTU_723	2	0	0	2	0	8	5	1	0	6	3	1	4	0	6	0	0	1	k__Bacteria; p__Firmicutes; c__Clostridia; o__Clostridiales; f__Clostridiales vadinBB60 group
OTU_1324	0	0	2	1	3	1	0	0	1	0	4	1	0	0	2	1	2	8	k__Bacteria; p__Firmicutes; c__Clostridia; o__Clostridiales; f__Lachnospiraceae; g__Syntrophococcus; s__uncultured rumen bacterium
OTU_631	3	2	20	2	9	6	10	8	4	4	11	16	10	3	15	9	6	3	k__Bacteria; p__Bacteroidetes; c__Bacteroidia; o__Bacteroidales; f__Prevotellaceae; g__Prevotella 1
OTU_1645	6	0	1	1	4	3	1	1	5	2	2	2	2	1	5	1	5	2	k__Bacteria; p__Firmicutes; c__Clostridia; o__Clostridiales; f__Lachnospiraceae; g__Acetitomaculum; s__uncultured rumen bacterium
OTU_4528	2	1	0	0	1	1	0	1	0	2	1	1	0	0	0	0	0	0	k__Bacteria; p__Firmicutes; c__Clostridia; o__Clostridiales; f__Lachnospiraceae; g__Lachnospiraceae NK3A20 group; s__uncultured Lachnospiraceae bacterium
OTU_2657	0	0	2	1	0	0	0	0	0	0	1	0	2	1	1	0	0	0	k__Bacteria; p__Firmicutes; c__Clostridia; o__Clostridiales; f__Ruminococcaceae; g__Ruminococcaceae UCG-014; s__unidentified
OTU_2645	1	2	1	1	2	2	0	0	3	1	1	3	3	0	1	0	2	0	k__Bacteria; p__Firmicutes; c__Clostridia; o__Clostridiales; f__Lachnospiraceae; g__Roseburia; s__uncultured rumen bacterium
OTU_7633	0	0	0	0	0	0	1	1	0	1	0	0	0	0	0	0	0	2	k__Bacteria; p__Bacteroidetes; c__Bacteroidia; o__Bacteroidales; f__Bacteroidales RF16 group; g__rumen bacterium YS3; s__rumen bacterium YS3
OTU_1850	3	2	2	3	0	0	2	1	0	1	1	0	1	0	0	2	0	0	k__Bacteria; p__Spirochaetes; c__Spirochaetia; o__Spirochaetales; f__Spirochaetaceae; g__Treponema 2
OTU_1582	2	0	0	1	0	0	0	0	2	0	0	0	0	0	0	0	0	0	k__Bacteria; p__Proteobacteria; c__Alphaproteobacteria; o__Rhizobiales; f__Beijerinckiaceae; g__Bosea; s__uncultured bacterium
OTU_1116	3	0	7	2	5	2	1	1	1	1	1	1	1	19	3	3	3	1	k__Bacteria; p__Firmicutes; c__Clostridia; o__Clostridiales; f__Ruminococcaceae; g__Ruminococcaceae UCG-014
OTU_6764	2	9	22	20	34	13	6	6	3	12	15	7	23	32	17	16	17	38	k__Bacteria; p__Bacteroidetes; c__Bacteroidia; o__Bacteroidales; f__Rikenellaceae; g__Rikenellaceae RC9 gut group; s__uncultured rumen bacterium
OTU_11013	1	0	0	3	1	2	0	0	0	0	0	0	0	0	1	3	1	0	k__Bacteria; p__Firmicutes; c__Clostridia; o__Clostridiales; f__Ruminococcaceae; g__Ruminococcaceae NK4A214 group
OTU_1234	4	2	0	0	0	0	0	0	1	0	0	0	0	0	0	1	0	3	k__Bacteria; p__Tenericutes; c__Mollicutes; o__Mollicutes RF39; f__uncultured bacterium; g__uncultured bacterium; s__uncultured bacterium
OTU_818	2	0	2	0	0	7	0	0	0	1	6	4	4	3	0	0	1	0	k__Bacteria; p__Firmicutes; c__Clostridia; o__Clostridiales; f__Ruminococcaceae; g__Ruminococcaceae UCG-010
OTU_1289	2	1	4	0	3	2	4	0	0	2	0	0	1	0	0	3	3	5	k__Bacteria; p__Spirochaetes; c__Spirochaetia; o__Spirochaetales; f__Spirochaetaceae; g__Treponema 2; s__uncultured rumen bacterium
OTU_1132	1	2	0	4	2	0	0	1	6	0	0	2	0	0	0	0	0	0	k__Bacteria; p__Tenericutes; c__Mollicutes; o__Mollicutes RF39
OTU_1648	1	1	0	1	0	1	0	0	2	0	0	0	0	0	0	1	0	2	k__Bacteria; p__Firmicutes; c__Clostridia; o__Clostridiales; f__Lachnospiraceae; g__Acetitomaculum; s__uncultured rumen bacterium
OTU_9827	3	3	2	14	1	5	1	1	3	0	3	2	11	9	7	5	4	7	k__Bacteria; p__Firmicutes; c__Clostridia; o__Clostridiales; f__Ruminococcaceae; g__Ruminococcaceae UCG-014; s__uncultured rumen bacterium
OTU_709	3	11	15	8	5	9	3	7	8	2	15	2	2	2	5	7	12	13	k__Bacteria; p__Firmicutes; c__Clostridia; o__Clostridiales; f__Family XIII
OTU_955	1	1	0	2	0	1	0	0	1	0	2	4	0	2	0	1	1	0	k__Bacteria; p__Firmicutes; c__Clostridia; o__Clostridiales; f__Clostridiales vadinBB60 group; g__uncultured bacterium; s__uncultured bacterium
OTU_11177	1	1	0	1	2	0	2	1	0	0	4	0	1	8	1	1	2	5	k__Bacteria; p__Firmicutes; c__Clostridia; o__Clostridiales
OTU_292	1	1	23	7	15	10	6	2	0	1	3	7	3	3	8	14	35	24	k__Bacteria; p__Firmicutes; c__Clostridia; o__Clostridiales; f__Christensenellaceae; g__Christensenellaceae R-7 group; s__gut metagenome
OTU_9168	3	0	0	0	0	1	0	9	0	6	0	3	0	0	2	3	1	0	k__Bacteria; p__Bacteroidetes; c__Bacteroidia; o__Bacteroidales; f__Prevotellaceae; g__Prevotella 7
OTU_1725	2	2	1	3	1	2	2	3	1	0	0	2	5	2	0	0	0	5	k__Bacteria; p__Firmicutes; c__Clostridia; o__Clostridiales; f__Lachnospiraceae; g__Lachnospiraceae NK3A20 group; s__uncultured bacterium
OTU_76	6	13	16	58	44	273	30	31	31	25	34	66	59	67	40	34	46	6	k__Bacteria; p__Bacteroidetes; c__Bacteroidia; o__Bacteroidales; f__Prevotellaceae; g__Prevotella 1; s__uncultured rumen bacterium
OTU_1630	2	2	1	0	0	0	0	1	1	0	0	2	0	0	3	0	0	0	k__Bacteria; p__Firmicutes; c__Clostridia; o__Clostridiales; f__Lachnospiraceae; g__Catonella
OTU_3213	4	6	9	9	2	9	7	20	2	12	3	20	0	17	19	15	8	1	k__Bacteria; p__Bacteroidetes; c__Bacteroidia; o__Bacteroidales; f__Prevotellaceae; g__Prevotella 7; s__uncultured bacterium
OTU_971	1	1	0	0	0	4	7	4	0	2	0	0	0	2	5	5	0	0	k__Bacteria; p__Bacteroidetes; c__Bacteroidia; o__Bacteroidales; f__F082; g__uncultured bacterium; s__uncultured bacterium
OTU_276	3	0	9	7	41	40	5	1	1	35	17	13	0	12	5	2	3	7	k__Bacteria; p__Firmicutes; c__Clostridia; o__Clostridiales; f__Lachnospiraceae; g__uncultured
OTU_2359	3	5	5	22	5	10	4	1	0	9	4	11	11	17	3	1	0	0	k__Bacteria; p__Firmicutes; c__Clostridia; o__Clostridiales; f__Ruminococcaceae; g__Ruminococcus 1
OTU_1883	2	0	0	1	0	0	0	1	0	0	0	0	0	4	1	0	0	0	k__Bacteria; p__Firmicutes; c__Clostridia; o__Clostridiales; f__Lachnospiraceae
OTU_1105	3	2	2	2	3	2	1	3	1	1	1	6	2	2	1	1	0	0	k__Bacteria; p__Firmicutes; c__Clostridia; o__Clostridiales; f__Christensenellaceae; g__Christensenellaceae R-7 group
OTU_621	1	1	6	0	7	2	2	1	0	1	8	2	2	2	0	7	7	3	k__Bacteria; p__Firmicutes; c__Clostridia; o__Clostridiales; f__Ruminococcaceae; g__Ruminococcaceae UCG-010; s__uncultured rumen bacterium
OTU_6693	2	3	2	2	2	1	2	3	2	3	2	5	1	4	2	4	1	1	k__Bacteria; p__Bacteroidetes; c__Bacteroidia; o__Bacteroidales; f__Prevotellaceae; g__Prevotella 1
OTU_1943	0	0	0	0	1	0	1	0	0	0	1	0	0	1	0	2	0	1	k__Bacteria; p__Firmicutes; c__Clostridia; o__Clostridiales; f__Ruminococcaceae; g__uncultured; s__uncultured rumen bacterium
OTU_1719	0	0	0	0	0	0	2	0	0	0	0	1	0	0	2	1	0	1	k__Bacteria; p__Tenericutes; c__Mollicutes; o__Mollicutes RF39; f__uncultured bacterium; g__uncultured bacterium; s__uncultured bacterium
OTU_688	2	5	9	4	2	5	0	2	8	7	8	6	0	8	7	4	0	27	k__Bacteria; p__Actinobacteria; c__Actinobacteria; o__Bifidobacteriales; f__Bifidobacteriaceae; g__Bifidobacterium; s__unidentified
OTU_7635	2	0	0	0	0	0	0	0	0	0	0	0	0	0	0	0	0	0	k__Bacteria; p__Firmicutes; c__Clostridia; o__Clostridiales; f__Lachnospiraceae; g__Shuttleworthia
OTU_2365	1	0	3	0	4	3	0	1	0	2	0	1	1	1	0	0	2	0	k__Bacteria; p__Firmicutes; c__Clostridia; o__Clostridiales; f__Lachnospiraceae; g__[Eubacterium] ruminantium group; s__uncultured Lachnospiraceae bacterium
OTU_7741	2	0	0	0	0	0	0	0	1	0	0	0	0	0	0	0	0	0	k__Bacteria; p__Proteobacteria; c__Alphaproteobacteria; o__Rickettsiales; f__Mitochondria
OTU_380	6	11	5	3	4	2	2	0	24	0	6	3	15	4	4	10	9	59	k__Bacteria; p__Firmicutes; c__Clostridia; o__Clostridiales; f__Family XIII; g__Family XIII UCG-001; s__uncultured rumen bacterium
OTU_807	1	0	4	5	6	14	3	2	1	8	6	6	0	7	7	7	4	8	k__Bacteria; p__Firmicutes; c__Clostridia; o__Clostridiales; f__Lachnospiraceae; g__Lachnospiraceae UCG-006; s__uncultured rumen bacterium
OTU_830	2	1	3	4	1	8	3	1	3	1	6	10	13	5	0	1	0	0	k__Bacteria; p__Bacteroidetes; c__Bacteroidia; o__Bacteroidales; f__Prevotellaceae; g__Prevotella 1; s__uncultured bacterium
OTU_5892	0	3	2	2	1	4	0	4	0	0	3	0	1	1	1	1	4	0	k__Bacteria; p__Firmicutes; c__Clostridia; o__Clostridiales; f__Ruminococcaceae; g__[Eubacterium] coprostanoligenes group
OTU_4474	0	1	0	0	0	0	0	0	0	0	0	1	0	3	1	0	1	0	k__Bacteria; p__Bacteroidetes; c__Bacteroidia; o__Bacteroidales; f__Prevotellaceae; g__Prevotella 7
OTU_2236	1	1	3	0	1	0	0	0	0	0	0	0	0	0	0	0	0	0	k__Bacteria; p__Spirochaetes; c__Spirochaetia; o__Spirochaetales; f__Spirochaetaceae; g__Treponema 2
OTU_433	1	1	15	2	11	8	4	7	6	4	4	4	8	15	16	18	11	14	k__Bacteria; p__Bacteroidetes; c__Bacteroidia; o__Bacteroidales; f__Prevotellaceae; g__Prevotella 1
OTU_1909	1	1	0	1	0	0	0	0	1	0	2	0	0	0	1	0	0	0	k__Bacteria; p__Tenericutes; c__Mollicutes; o__Mollicutes RF39
OTU_584	3	3	1	9	2	2	1	3	3	4	2	2	5	4	4	12	4	8	k__Bacteria; p__Patescibacteria; c__Saccharimonadia; o__Saccharimonadales; f__Saccharimonadaceae; g__Candidatus Saccharimonas; s__uncultured rumen bacterium
OTU_9980	1	1	1	0	0	1	2	1	0	0	1	2	1	1	0	0	0	0	k__Bacteria; p__Firmicutes; c__Clostridia; o__Clostridiales; f__Ruminococcaceae; g__Ruminococcaceae UCG-014
OTU_2804	2	0	0	0	0	0	0	0	0	0	0	0	0	0	0	0	0	0	k__Bacteria; p__Actinobacteria; c__Coriobacteriia; o__Coriobacteriales
OTU_3396	0	1	1	1	0	2	1	0	4	1	0	2	1	0	1	0	0	0	k__Bacteria; p__Bacteroidetes; c__Bacteroidia; o__Bacteroidales; f__Prevotellaceae; g__Prevotella 1; s__uncultured rumen bacterium
OTU_2185	2	4	17	3	4	3	2	5	3	6	3	0	9	3	2	4	2	0	k__Bacteria; p__Bacteroidetes; c__Bacteroidia; o__Bacteroidales; f__Prevotellaceae; g__Prevotella 1; s__uncultured rumen bacterium
OTU_8840	0	0	3	0	0	0	0	1	0	2	0	0	3	0	1	0	0	0	k__Bacteria; p__Bacteroidetes; c__Bacteroidia; o__Bacteroidales; f__Prevotellaceae; g__Prevotellaceae UCG-001; s__uncultured rumen bacterium
OTU_9658	4	8	13	8	4	5	6	8	1	8	3	9	11	0	8	4	1	4	k__Bacteria; p__Bacteroidetes; c__Bacteroidia; o__Bacteroidales; f__Prevotellaceae; g__Prevotella 1
OTU_8411	1	0	0	0	0	0	0	0	0	0	0	0	0	0	0	0	0	0	k__Bacteria; p__Firmicutes; c__Clostridia; o__Clostridiales; f__Lachnospiraceae
OTU_803	3	10	8	6	3	4	3	2	32	4	5	5	8	8	2	8	7	19	k__Bacteria; p__Firmicutes; c__Clostridia; o__Clostridiales; f__Family XIII; g__[Eubacterium] nodatum group; s__Eubacterium sp. AB3007
OTU_3153	2	0	0	0	0	0	0	1	0	1	0	1	0	0	0	0	0	0	k__Bacteria; p__Firmicutes; c__Clostridia; o__Clostridiales; f__Lachnospiraceae
OTU_3123	0	0	9	5	3	2	1	3	14	3	9	1	7	3	6	3	10	72	k__Bacteria; p__Firmicutes; c__Clostridia; o__Clostridiales; f__Christensenellaceae; g__Christensenellaceae R-7 group
OTU_1262	3	0	0	1	1	0	0	1	3	0	0	5	2	0	0	1	0	0	k__Bacteria; p__Spirochaetes; c__Spirochaetia; o__Spirochaetales; f__Spirochaetaceae; g__Sphaerochaeta; s__uncultured bacterium
OTU_7823	0	0	0	0	0	0	0	0	0	2	0	0	0	0	0	0	1	0	k__Bacteria; p__Firmicutes; c__Clostridia; o__Clostridiales; f__Lachnospiraceae
OTU_3993	1	3	15	5	7	9	5	1	2	1	2	2	0	2	0	3	1	0	k__Bacteria; p__Bacteroidetes; c__Bacteroidia; o__Bacteroidales; f__Prevotellaceae; g__Prevotella 1; s__uncultured rumen bacterium
OTU_941	9	34	17	39	18	44	6	7	26	10	35	20	21	17	21	11	15	4	k__Bacteria; p__Bacteroidetes; c__Bacteroidia; o__Bacteroidales; f__Prevotellaceae; g__Prevotella 1
OTU_1792	0	0	0	0	4	0	1	0	0	0	1	0	0	0	0	1	0	0	k__Bacteria; p__Firmicutes; c__Clostridia; o__Clostridiales; f__Family XIII; g__[Eubacterium] nodatum group
OTU_2125	1	0	0	0	4	0	0	0	2	0	1	0	0	0	1	0	0	1	k__Bacteria; p__Firmicutes; c__Clostridia; o__Clostridiales; f__Family XIII; g__[Eubacterium] nodatum group
OTU_3841	2	3	1	1	1	3	3	4	8	4	1	0	0	1	0	1	0	1	k__Bacteria; p__Bacteroidetes; c__Bacteroidia; o__Bacteroidales; f__Prevotellaceae; g__Prevotella 1
OTU_1390	1	0	0	0	9	0	0	0	0	0	0	0	5	0	0	0	0	0	k__Bacteria; p__Firmicutes; c__Clostridia; o__Clostridiales; f__Ruminococcaceae; g__CAG-352
OTU_610	0	0	6	3	22	0	11	10	0	4	1	1	0	4	7	7	19	5	k__Bacteria; p__Firmicutes; c__Clostridia; o__Clostridiales; f__Ruminococcaceae; g__Ruminococcaceae UCG-014; s__uncultured bacterium
OTU_7244	1	2	0	0	0	2	3	3	3	1	0	1	0	0	1	1	0	0	k__Bacteria; p__Firmicutes; c__Clostridia; o__Clostridiales; f__Lachnospiraceae; g__[Eubacterium] ruminantium group
OTU_7974	1	1	0	1	5	1	1	1	4	2	1	3	3	8	5	2	6	7	k__Bacteria; p__Firmicutes; c__Clostridia; o__Clostridiales; f__Ruminococcaceae; g__Ruminococcaceae NK4A214 group
OTU_1101	2	2	5	1	1	3	5	1	1	0	2	0	0	0	0	2	1	1	k__Bacteria; p__Bacteroidetes; c__Bacteroidia; o__Bacteroidales; f__Bacteroidales BS11 gut group; g__uncultured rumen bacterium; s__uncultured rumen bacterium
OTU_512	10	13	1	7	0	1	4	3	3	2	3	7	0	0	1	0	1	0	k__Bacteria; p__Actinobacteria; c__Coriobacteriia; o__Coriobacteriales; f__Atopobiaceae; g__Olsenella; s__uncultured bacterium
OTU_10657	2	2	0	2	0	0	0	0	0	4	2	0	0	0	0	2	0	2	k__Bacteria; p__Patescibacteria; c__Saccharimonadia; o__Saccharimonadales; f__Saccharimonadaceae; g__Candidatus Saccharimonas; s__uncultured bacterium
OTU_2090	5	0	0	0	0	0	0	0	0	0	0	0	0	0	2	0	0	0	k__Bacteria; p__Deferribacteres; c__Deferribacteres; o__Deferribacterales; f__Deferribacteraceae; g__Mucispirillum
OTU_9666	3	0	2	0	1	6	2	7	0	5	9	2	0	0	0	1	0	0	k__Bacteria; p__Firmicutes; c__Clostridia; o__Clostridiales; f__Lachnospiraceae; g__[Eubacterium] ruminantium group; s__uncultured rumen bacterium
OTU_516	2	8	41	38	60	24	20	16	31	13	38	15	61	60	42	41	70	118	k__Bacteria; p__Firmicutes; c__Clostridia; o__Clostridiales; f__Ruminococcaceae; g__Ruminococcaceae NK4A214 group; s__uncultured rumen bacterium
OTU_2453	1	0	0	0	0	1	0	0	0	1	3	0	0	0	0	2	0	1	k__Bacteria; p__Firmicutes; c__Clostridia; o__Clostridiales; f__Lachnospiraceae
OTU_7827	2	0	0	0	0	0	0	0	0	2	0	1	0	0	0	0	0	0	k__Bacteria; p__Firmicutes; c__Clostridia; o__Clostridiales; f__Lachnospiraceae
OTU_2323	4	5	48	25	80	28	26	3	20	14	73	5	34	21	42	42	58	168	k__Bacteria; p__Firmicutes; c__Clostridia; o__Clostridiales; f__Ruminococcaceae; g__Ruminococcus 2; s__uncultured bacterium
OTU_756	2	5	6	3	0	3	3	1	0	1	2	1	2	0	2	1	1	2	k__Bacteria; p__Firmicutes; c__Clostridia; o__Clostridiales; f__Clostridiales vadinBB60 group; g__uncultured rumen bacterium; s__uncultured rumen bacterium
OTU_1785	1	1	0	0	0	1	0	0	0	0	0	2	2	0	3	0	0	0	k__Bacteria; p__Firmicutes; c__Erysipelotrichia; o__Erysipelotrichales; f__Erysipelotrichaceae
OTU_6466	6	4	1	1	3	2	1	0	9	2	3	2	8	1	2	9	3	8	k__Bacteria; p__Firmicutes; c__Clostridia; o__Clostridiales; f__Lachnospiraceae; g__Acetitomaculum
OTU_2767	2	0	2	2	4	0	1	0	5	1	3	0	4	7	3	0	4	7	k__Bacteria; p__Firmicutes; c__Clostridia; o__Clostridiales; f__Ruminococcaceae; g__Ruminococcaceae NK4A214 group
OTU_3832	1	0	6	3	16	3	0	0	12	0	2	4	3	2	3	3	1	20	k__Bacteria; p__Firmicutes; c__Clostridia; o__Clostridiales; f__Lachnospiraceae
OTU_1031	1	6	6	3	7	5	1	1	1	10	6	2	3	0	4	1	0	1	k__Bacteria; p__Proteobacteria; c__Alphaproteobacteria; o__Rhodospirillales; f__uncultured
OTU_1338	2	5	0	0	0	0	2	0	0	0	0	4	0	0	0	0	0	0	k__Bacteria; p__Firmicutes; c__Clostridia; o__Clostridiales; f__Lachnospiraceae
OTU_507	1	2	8	11	6	4	1	3	4	6	7	4	6	4	3	5	7	1	k__Bacteria; p__Firmicutes; c__Erysipelotrichia; o__Erysipelotrichales; f__Erysipelotrichaceae; g__Erysipelotrichaceae UCG-004; s__uncultured bacterium
OTU_1268	3	4	2	1	0	4	1	0	2	1	2	2	4	1	4	3	1	5	k__Bacteria; p__Firmicutes; c__Clostridia; o__Clostridiales; f__Lachnospiraceae; g__Syntrophococcus
OTU_463	7	0	16	14	24	7	1	4	13	12	7	3	32	7	8	6	14	20	k__Bacteria; p__Firmicutes; c__Clostridia; o__Clostridiales; f__Ruminococcaceae; g__Ruminiclostridium 6
OTU_1304	2	3	6	3	3	11	1	3	3	2	2	6	5	1	0	0	1	0	k__Bacteria; p__Fibrobacteres; c__Fibrobacteria; o__Fibrobacterales; f__Fibrobacteraceae; g__Fibrobacter
OTU_2997	1	0	0	0	0	0	0	0	1	0	0	0	0	0	0	0	0	0	k__Bacteria; p__Bacteroidetes; c__Bacteroidia; o__Bacteroidales; f__Prevotellaceae; g__Prevotella 1
OTU_1497	2	1	1	0	0	3	2	0	0	1	1	2	0	1	0	1	0	0	k__Bacteria; p__Firmicutes; c__Clostridia; o__Clostridiales; f__Family XIII; g__Anaerovorax; s__uncultured rumen bacterium
OTU_1870	1	0	1	2	1	2	1	0	0	0	1	0	2	0	3	0	2	0	k__Bacteria; p__Bacteroidetes; c__Bacteroidia; o__Bacteroidales; f__Prevotellaceae; g__Alloprevotella; s__uncultured rumen bacterium
OTU_1200	3	0	4	5	1	6	0	2	2	3	3	1	4	1	0	2	7	0	k__Bacteria; p__Bacteroidetes; c__Bacteroidia; o__Bacteroidales; f__Prevotellaceae; g__Prevotellaceae UCG-001; s__uncultured rumen bacterium
OTU_713	3	17	6	6	10	3	3	2	3	9	6	1	2	7	3	0	6	2	k__Bacteria; p__Firmicutes; c__Clostridia; o__Clostridiales; f__Lachnospiraceae; g__Lachnospiraceae AC2044 group; s__uncultured bacterium
OTU_479	3	1	15	14	5	5	5	0	0	6	12	1	13	2	17	16	10	7	k__Bacteria; p__Bacteroidetes; c__Bacteroidia; o__Bacteroidales; f__Bacteroidales UCG-001; g__uncultured rumen bacterium; s__uncultured rumen bacterium
OTU_9554	3	0	0	2	0	0	0	0	0	0	2	1	0	0	0	0	0	0	k__Bacteria; p__Tenericutes; c__Mollicutes; o__Mollicutes RF39
OTU_7407	4	4	15	5	10	14	5	9	13	15	15	8	5	16	1	1	4	2	k__Bacteria; p__Firmicutes; c__Clostridia; o__Clostridiales; f__Lachnospiraceae; g__[Eubacterium] ruminantium group; s__uncultured rumen bacterium
OTU_2255	1	1	1	1	0	3	1	1	2	0	3	1	2	3	1	2	2	2	k__Bacteria; p__Firmicutes; c__Clostridia; o__Clostridiales; f__Christensenellaceae; g__Christensenellaceae R-7 group
OTU_930	1	0	0	1	0	0	0	0	0	2	0	1	0	0	0	1	0	0	k__Bacteria; p__Firmicutes; c__Negativicutes; o__Selenomonadales; f__Veillonellaceae; g__Megasphaera; s__uncultured bacterium
OTU_5942	6	4	0	0	0	0	0	0	2	3	2	4	1	0	0	0	0	0	k__Bacteria; p__Firmicutes; c__Clostridia; o__Clostridiales; f__Lachnospiraceae; g__Lachnospiraceae NK3A20 group
OTU_490	3	2	6	1	1	5	0	7	1	0	9	6	6	2	11	12	14	2	k__Bacteria; p__Bacteroidetes; c__Bacteroidia; o__Bacteroidales; f__Prevotellaceae; g__Prevotella 9
OTU_1014	6	4	2	1	1	1	0	0	0	1	2	1	1	0	2	7	2	4	k__Bacteria; p__Patescibacteria; c__Saccharimonadia; o__Saccharimonadales; f__Saccharimonadaceae; g__Candidatus Saccharimonas; s__uncultured rumen bacterium
OTU_3	0	5	2	3	1	2	3	0	3	3	2	3	0	3	2	2	1	0	k__Bacteria; p__Firmicutes; c__Clostridia; o__Clostridiales; f__Ruminococcaceae; g__Ruminococcaceae UCG-005; s__uncultured Ruminococcaceae bacterium
OTU_2011	2	0	0	0	0	0	0	0	0	0	0	0	0	0	0	0	0	1	k__Bacteria; p__Verrucomicrobia; c__Verrucomicrobiae; o__Verrucomicrobiales; f__Akkermansiaceae; g__Akkermansia; s__uncultured bacterium
OTU_962	3	2	4	6	9	11	2	1	18	1	2	0	4	2	5	0	0	2	k__Bacteria; p__Firmicutes; c__Bacilli; o__Lactobacillales; f__Streptococcaceae; g__Streptococcus
OTU_669	6	10	55	8	17	21	18	16	23	18	22	8	10	9	14	12	1	3	k__Bacteria; p__Bacteroidetes; c__Bacteroidia; o__Bacteroidales; f__Prevotellaceae; g__Prevotella 1
OTU_2568	5	14	9	5	7	9	5	5	2	2	23	6	4	2	3	9	9	9	k__Bacteria; p__Firmicutes; c__Clostridia; o__Clostridiales; f__Ruminococcaceae; g__Ruminococcaceae UCG-001; s__uncultured bacterium
OTU_1845	6	5	4	2	0	0	1	2	2	2	0	0	0	0	1	1	0	0	k__Bacteria; p__Firmicutes; c__Negativicutes; o__Selenomonadales; f__Veillonellaceae; g__uncultured
OTU_1560	1	0	1	1	1	3	0	0	1	0	0	0	2	1	0	1	0	5	k__Bacteria; p__Firmicutes; c__Clostridia; o__Clostridiales; f__Ruminococcaceae; g__[Eubacterium] coprostanoligenes group; s__uncultured rumen bacterium
OTU_2903	2	4	0	1	1	6	0	1	1	3	2	4	1	1	5	3	0	0	k__Bacteria; p__Firmicutes; c__Clostridia; o__Clostridiales; f__Lachnospiraceae; g__Oribacterium; s__uncultured rumen bacterium
OTU_3960	1	0	1	1	0	0	0	0	2	0	1	0	0	1	0	0	5	2	k__Bacteria; p__Firmicutes; c__Clostridia; o__Clostridiales; f__Ruminococcaceae; g__Ruminococcaceae UCG-014
OTU_10691	1	0	0	0	0	0	0	0	0	0	2	0	0	1	0	0	1	0	k__Bacteria; p__Firmicutes; c__Clostridia; o__Clostridiales
OTU_6997	1	0	2	5	0	2	1	3	0	5	3	1	0	1	0	2	0	0	k__Bacteria; p__Bacteroidetes; c__Bacteroidia; o__Bacteroidales; f__Muribaculaceae; g__uncultured rumen bacterium; s__uncultured rumen bacterium
OTU_354	5	8	10	21	12	33	13	20	11	10	13	16	41	17	2	1	7	4	k__Bacteria; p__Firmicutes; c__Clostridia; o__Clostridiales; f__Ruminococcaceae; g__[Eubacterium] coprostanoligenes group
OTU_335	5	4	18	32	15	31	2	8	4	3	42	5	21	44	11	18	18	23	k__Bacteria; p__Bacteroidetes; c__Bacteroidia; o__Bacteroidales; f__Rikenellaceae; g__Rikenellaceae RC9 gut group; s__uncultured rumen bacterium
OTU_340	1	6	8	7	24	19	0	0	4	0	11	3	4	10	9	10	8	6	k__Bacteria; p__Bacteroidetes; c__Bacteroidia; o__Bacteroidales; f__Prevotellaceae; g__Prevotella 1; s__uncultured rumen bacterium
OTU_5396	2	1	0	2	3	3	1	0	2	3	1	3	1	0	2	2	4	1	k__Bacteria; p__Bacteroidetes; c__Bacteroidia; o__Bacteroidales; f__Prevotellaceae; g__Prevotella 1; s__uncultured rumen bacterium
OTU_4433	0	0	0	1	0	1	2	3	0	1	0	3	1	0	3	3	0	0	k__Bacteria; p__Bacteroidetes; c__Bacteroidia; o__Bacteroidales
OTU_331	13	8	5	14	25	14	5	2	12	4	25	6	19	42	10	18	25	29	k__Bacteria; p__Bacteroidetes; c__Bacteroidia; o__Bacteroidales; f__Rikenellaceae; g__Rikenellaceae RC9 gut group; s__uncultured rumen bacterium
OTU_8311	1	0	0	0	0	0	0	0	0	0	0	0	0	0	0	0	0	0	k__Bacteria; p__Firmicutes; c__Clostridia; o__Clostridiales; f__Lachnospiraceae; g__Butyrivibrio 2
OTU_720	2	0	2	4	6	2	1	3	2	1	6	2	0	0	0	3	5	2	k__Bacteria; p__Firmicutes; c__Erysipelotrichia; o__Erysipelotrichales; f__Erysipelotrichaceae; g__Asteroleplasma; s__uncultured rumen bacterium
OTU_1130	3	1	5	0	3	1	1	5	6	0	2	4	8	2	0	4	5	2	k__Bacteria; p__Firmicutes; c__Clostridia; o__Clostridiales; f__Family XIII
OTU_7272	1	0	2	0	1	0	0	1	2	0	2	1	0	0	2	0	0	0	k__Bacteria; p__Bacteroidetes; c__Bacteroidia; o__Bacteroidales; f__Prevotellaceae; g__uncultured; s__uncultured rumen bacterium
OTU_1361	6	0	4	0	1	2	0	1	0	0	0	11	2	8	1	1	0	0	k__Bacteria; p__Firmicutes; c__Negativicutes; o__Selenomonadales; f__Acidaminococcaceae; g__Succiniclasticum; s__uncultured rumen bacterium
OTU_1271	5	1	0	0	0	0	1	1	0	1	0	2	6	0	0	0	0	0	k__Bacteria; p__Firmicutes; c__Clostridia; o__Clostridiales; f__Ruminococcaceae; g__Ruminococcaceae UCG-014
OTU_397	3	2	8	5	2	8	0	3	2	4	1	3	4	0	1	0	2	0	k__Bacteria; p__Firmicutes; c__Clostridia; o__Clostridiales; f__Ruminococcaceae; g__Ruminococcus 1; s__uncultured Ruminococcus sp.
OTU_1872	1	0	0	0	0	2	0	0	0	0	0	1	0	0	0	0	0	0	k__Bacteria; p__Cyanobacteria; c__Melainabacteria; o__Gastranaerophilales; f__uncultured bacterium; g__uncultured bacterium; s__uncultured bacterium
OTU_7174	3	1	0	0	0	0	0	0	0	2	0	0	0	1	0	0	0	0	k__Bacteria; p__Firmicutes; c__Clostridia; o__Clostridiales; f__Lachnospiraceae; g__Shuttleworthia
OTU_287	0	0	0	0	0	0	0	0	0	0	0	0	0	0	0	0	0	0	k__Bacteria; p__Firmicutes; c__Clostridia; o__Clostridiales; f__Ruminococcaceae; g__Ruminococcaceae UCG-010; s__uncultured bacterium
OTU_2257	1	4	0	2	1	1	1	0	0	1	3	0	2	0	1	0	0	1	k__Bacteria; p__Tenericutes; c__Mollicutes; o__Mollicutes RF39; f__uncultured bacterium; g__uncultured bacterium; s__uncultured bacterium
OTU_1769	0	0	15	2	7	3	1	1	0	2	3	1	5	3	3	2	15	15	k__Bacteria; p__Bacteroidetes; c__Bacteroidia; o__Bacteroidales; f__Prevotellaceae; g__Prevotella 1; s__uncultured rumen bacterium
OTU_8301	3	6	4	7	1	23	2	13	2	7	11	49	7	41	71	70	12	0	k__Bacteria; p__Bacteroidetes; c__Bacteroidia; o__Bacteroidales; f__Prevotellaceae; g__Prevotella 7
OTU_1032	0	0	0	0	0	5	0	1	1	3	1	0	0	0	0	0	1	0	k__Bacteria; p__Firmicutes; c__Clostridia; o__Clostridiales; f__Ruminococcaceae; g__[Eubacterium] coprostanoligenes group
OTU_10460	0	0	0	3	2	4	0	1	0	1	3	2	0	0	1	6	0	2	k__Bacteria; p__Firmicutes; c__Clostridia; o__Clostridiales; f__Ruminococcaceae; g__Ruminococcaceae UCG-002
OTU_593	1	1	12	26	32	11	7	8	9	7	14	4	10	12	7	7	18	25	k__Bacteria; p__Bacteroidetes; c__Bacteroidia; o__Bacteroidales; f__Prevotellaceae; g__Prevotellaceae UCG-003; s__uncultured rumen bacterium
OTU_236	2	0	0	0	0	2	0	0	0	0	0	0	0	0	0	0	2	0	k__Bacteria; p__Firmicutes; c__Clostridia; o__Clostridiales; f__Ruminococcaceae; g__[Eubacterium] coprostanoligenes group
OTU_1841	2	0	0	0	0	0	0	0	1	0	1	0	0	1	0	0	0	1	k__Bacteria; p__Actinobacteria; c__Coriobacteriia; o__Coriobacteriales; f__Eggerthellaceae
OTU_2793	1	0	3	0	2	2	0	0	0	0	0	0	0	1	1	1	0	0	k__Bacteria; p__Bacteroidetes; c__Bacteroidia; o__Bacteroidales; f__Prevotellaceae; g__Prevotella 1
OTU_3412	1	3	0	0	0	0	0	0	2	0	0	0	0	0	0	1	1	0	k__Bacteria; p__Firmicutes; c__Clostridia; o__Clostridiales; f__Lachnospiraceae
OTU_4133	1	1	0	0	0	0	0	0	1	0	1	0	1	0	0	4	2	0	k__Bacteria; p__Firmicutes; c__Clostridia; o__Clostridiales; f__Lachnospiraceae
OTU_536	1	0	11	4	5	5	10	9	1	4	13	5	12	0	10	6	3	5	k__Bacteria; p__Firmicutes; c__Erysipelotrichia; o__Erysipelotrichales; f__Erysipelotrichaceae; g__[Anaerorhabdus] furcosa group; s__uncultured Erysipelotrichaceae bacterium
OTU_942	3	0	0	4	3	2	0	2	3	1	2	2	2	1	2	3	1	2	k__Bacteria; p__Firmicutes; c__Clostridia; o__Clostridiales; f__Christensenellaceae; g__Christensenellaceae R-7 group
OTU_3176	2	1	6	4	1	4	3	5	6	13	9	14	4	9	10	7	6	0	k__Bacteria; p__Bacteroidetes; c__Bacteroidia; o__Bacteroidales; f__Prevotellaceae; g__Prevotella 7
OTU_1522	1	0	1	6	2	0	1	1	0	3	2	2	2	3	5	1	0	0	k__Bacteria; p__Bacteroidetes; c__Bacteroidia; o__Bacteroidales; f__Muribaculaceae; g__uncultured rumen bacterium; s__uncultured rumen bacterium
OTU_1387	1	2	3	1	3	4	2	2	13	1	0	1	0	2	0	6	3	14	k__Bacteria; p__Firmicutes; c__Clostridia; o__Clostridiales; f__Family XIII; g__Mogibacterium
OTU_224	1	11	24	26	164	10	21	16	27	5	57	10	32	293	20	80	76	82	k__Bacteria; p__Bacteroidetes; c__Bacteroidia; o__Bacteroidales; f__Rikenellaceae; g__Rikenellaceae RC9 gut group; s__uncultured bacterium
OTU_1206	2	4	1	1	0	1	4	2	0	2	2	1	2	0	2	2	0	0	k__Bacteria; p__Firmicutes; c__Clostridia; o__Clostridiales; f__Christensenellaceae; g__Christensenellaceae R-7 group
OTU_5838	0	1	0	1	2	0	0	0	0	0	0	0	0	0	3	0	1	0	k__Bacteria; p__Actinobacteria; c__Coriobacteriia; o__Coriobacteriales; f__Atopobiaceae; g__Atopobium
OTU_1502	0	3	2	4	6	4	5	3	0	4	5	1	6	4	8	5	2	0	k__Bacteria; p__Bacteroidetes; c__Bacteroidia; o__Bacteroidales; f__Prevotellaceae; g__Prevotella 1; s__uncultured rumen bacterium
OTU_1979	1	0	0	0	0	0	0	0	0	0	3	2	0	0	0	0	0	0	k__Bacteria; p__Proteobacteria; c__Alphaproteobacteria; o__Rhodobacterales; f__Rhodobacteraceae; g__Nautella; s__uncultured bacterium
OTU_6888	1	1	0	0	0	0	0	0	0	2	0	0	0	0	0	0	0	0	k__Bacteria; p__Firmicutes; c__Clostridia; o__Clostridiales; f__Lachnospiraceae
OTU_2202	2	0	0	0	0	0	0	0	0	0	1	1	0	0	1	1	0	0	k__Bacteria; p__Tenericutes; c__Mollicutes; o__Mollicutes RF39
OTU_1466	1	0	0	1	0	0	0	0	0	0	0	1	0	0	0	0	1	0	k__Bacteria; p__Actinobacteria; c__Coriobacteriia; o__Coriobacteriales
OTU_7981	0	1	2	0	1	2	0	0	1	1	0	0	1	5	0	0	2	0	k__Bacteria; p__Firmicutes; c__Clostridia; o__Clostridiales; f__Ruminococcaceae; g__Ruminococcaceae UCG-014; s__unidentified rumen bacterium 12-124
OTU_799	1	0	0	1	0	5	0	1	0	0	1	0	0	0	1	0	0	0	k__Bacteria; p__Firmicutes; c__Clostridia; o__Clostridiales; f__Ruminococcaceae; g__Ruminococcaceae UCG-013; s__uncultured bacterium
OTU_999	3	0	1	2	1	3	0	1	0	0	2	0	3	0	5	0	3	1	k__Bacteria; p__Firmicutes; c__Clostridia; o__Clostridiales; f__Lachnospiraceae; g__Shuttleworthia
OTU_9665	2	3	1	0	0	2	1	5	2	6	4	6	1	3	10	7	4	1	k__Bacteria; p__Bacteroidetes; c__Bacteroidia; o__Bacteroidales; f__Prevotellaceae; g__Prevotella 7; s__uncultured bacterium
OTU_129	3	20	34	32	33	9	7	20	64	8	29	29	56	44	52	40	27	47	k__Bacteria; p__Firmicutes; c__Clostridia; o__Clostridiales; f__Ruminococcaceae; g__Ruminococcaceae UCG-014; s__uncultured rumen bacterium
OTU_1429	2	0	1	0	0	0	1	0	1	4	0	1	0	0	1	0	0	0	k__Bacteria; p__Firmicutes; c__Negativicutes; o__Selenomonadales; f__Veillonellaceae; g__Megasphaera; s__Megasphaera sp. MH
OTU_8705	0	0	1	1	0	1	0	0	0	0	0	0	0	0	0	0	0	0	k__Bacteria; p__Proteobacteria; c__Deltaproteobacteria; o__Desulfovibrionales; f__Desulfovibrionaceae; g__Desulfovibrio
OTU_1825	2	4	10	10	8	6	2	9	21	6	14	3	17	18	9	25	22	64	k__Bacteria; p__Firmicutes; c__Clostridia; o__Clostridiales; f__Christensenellaceae; g__Christensenellaceae R-7 group
OTU_8738	4	1	0	1	1	1	0	3	1	1	0	3	2	1	1	0	1	0	k__Bacteria; p__Firmicutes; c__Clostridia; o__Clostridiales; f__Lachnospiraceae; g__Shuttleworthia; s__uncultured rumen bacterium
OTU_9630	1	0	0	0	0	0	0	0	0	0	0	0	0	0	0	0	0	0	k__Bacteria; p__Actinobacteria; c__Actinobacteria; o__Streptosporangiales; f__Nocardiopsaceae; g__Nocardiopsis
OTU_428	6	4	8	18	15	14	4	6	4	9	11	2	3	8	4	7	4	7	k__Bacteria; p__Firmicutes; c__Clostridia; o__Clostridiales; f__Family XIII; g__Anaerovorax; s__uncultured rumen bacterium
OTU_1290	3	0	8	4	1	8	3	5	0	1	3	1	0	1	4	2	0	0	k__Bacteria; p__Bacteroidetes; c__Bacteroidia; o__Bacteroidales; f__Muribaculaceae
OTU_2902	0	0	0	0	0	0	0	0	0	0	0	0	0	0	0	0	0	0	k__Bacteria; p__Firmicutes; c__Clostridia; o__Clostridiales; f__Ruminococcaceae; g__Ruminococcaceae UCG-005
OTU_759	2	1	0	5	1	0	2	3	0	3	2	2	0	0	0	3	1	0	k__Bacteria; p__Firmicutes; c__Bacilli; o__Lactobacillales; f__Lactobacillaceae; g__Lactobacillus; s__Lactobacillus sp. C33LV5
OTU_1241	1	0	3	3	0	0	0	1	0	4	1	0	1	2	0	2	0	2	k__Bacteria; p__Proteobacteria; c__Alphaproteobacteria; o__Rhodospirillales; f__uncultured; g__uncultured rumen bacterium; s__uncultured rumen bacterium
OTU_1108	4	13	4	4	5	11	3	3	2	3	6	0	7	3	2	2	1	1	k__Bacteria; p__Bacteroidetes; c__Bacteroidia; o__Bacteroidales; f__Rikenellaceae; g__Rikenellaceae RC9 gut group
OTU_577	1	2	16	7	27	28	9	1	11	5	30	2	6	11	24	5	1	1	k__Bacteria; p__Bacteroidetes; c__Bacteroidia; o__Bacteroidales; f__Prevotellaceae; g__Prevotellaceae UCG-004; s__uncultured rumen bacterium 4C0d-8
OTU_2203	3	0	3	0	2	0	0	1	0	1	0	1	0	0	0	0	0	0	k__Bacteria; p__Firmicutes; c__Clostridia; o__Clostridiales; f__Lachnospiraceae
OTU_2479	3	0	4	4	40	12	1	0	4	0	9	2	7	57	9	22	38	34	k__Bacteria; p__Bacteroidetes; c__Bacteroidia; o__Bacteroidales; f__Rikenellaceae; g__Rikenellaceae RC9 gut group
OTU_904	3	10	11	10	23	19	12	3	10	4	10	5	9	4	11	6	9	8	k__Bacteria; p__Bacteroidetes; c__Bacteroidia; o__Bacteroidales; f__Muribaculaceae; g__uncultured bacterium; s__uncultured bacterium
OTU_6308	1	1	0	0	0	2	3	4	0	5	3	3	0	3	6	8	0	0	k__Bacteria; p__Bacteroidetes; c__Bacteroidia; o__Bacteroidales; f__Prevotellaceae
OTU_5710	3	0	0	1	0	1	0	1	3	0	1	2	2	0	1	0	0	0	k__Bacteria; p__Firmicutes; c__Clostridia; o__Clostridiales; f__Lachnospiraceae; g__Lachnospiraceae NK3A20 group
OTU_1225	6	1	2	10	2	1	1	2	2	1	0	2	1	0	2	0	0	2	k__Bacteria; p__Tenericutes; c__Mollicutes; o__Mollicutes RF39; f__uncultured rumen bacterium; g__uncultured rumen bacterium; s__uncultured rumen bacterium
OTU_6458	1	2	0	0	0	2	0	0	0	0	1	0	1	0	0	0	0	0	k__Bacteria; p__Firmicutes; c__Clostridia; o__Clostridiales; f__Lachnospiraceae; g__Oribacterium; s__uncultured bacterium
OTU_8358	1	0	0	0	1	0	0	0	1	0	0	0	1	4	0	2	5	4	k__Bacteria; p__Firmicutes; c__Clostridia; o__Clostridiales; f__Lachnospiraceae; g__[Ruminococcus] gauvreauii group
OTU_464	1	14	3	5	5	2	2	4	32	0	7	3	7	5	3	1	17	10	k__Bacteria; p__Firmicutes; c__Clostridia; o__Clostridiales; f__Christensenellaceae; g__Christensenellaceae R-7 group
OTU_988	1	0	28	2	1	7	0	0	0	19	7	0	7	5	0	0	0	0	k__Bacteria; p__Firmicutes; c__Clostridia; o__Clostridiales; f__Lachnospiraceae
OTU_2160	0	0	0	0	0	0	0	0	0	0	0	3	0	0	0	0	0	0	k__Bacteria; p__Firmicutes; c__Clostridia; o__Clostridiales; f__Ruminococcaceae; g__Ruminococcaceae UCG-013; s__uncultured bacterium
OTU_792	1	4	1	3	4	5	1	1	1	2	2	3	0	0	1	1	2	2	k__Bacteria; p__Firmicutes; c__Erysipelotrichia; o__Erysipelotrichales; f__Erysipelotrichaceae; g__[Anaerorhabdus] furcosa group
OTU_2398	1	4	9	5	6	6	7	7	5	9	13	3	9	3	5	7	13	12	k__Bacteria; p__Firmicutes; c__Clostridia; o__Clostridiales; f__Ruminococcaceae; g__Ruminococcaceae UCG-011; s__uncultured rumen bacterium
OTU_6139	2	1	0	0	1	0	1	0	5	0	0	1	1	0	0	2	2	1	k__Bacteria; p__Firmicutes; c__Clostridia; o__Clostridiales; f__Lachnospiraceae; g__Lachnospiraceae NK3A20 group
OTU_1209	0	0	0	3	2	0	0	1	0	1	0	3	0	0	5	3	1	1	k__Bacteria; p__Bacteroidetes; c__Bacteroidia; o__Bacteroidales; f__Muribaculaceae
OTU_764	1	4	2	4	5	9	0	2	9	2	9	8	1	1	5	11	5	22	k__Bacteria; p__Firmicutes; c__Clostridia; o__Clostridiales; f__Family XIII; g__Mogibacterium; s__uncultured rumen bacterium
OTU_1682	2	2	3	1	2	2	1	1	0	0	1	0	0	1	2	2	2	1	k__Bacteria
OTU_865	1	1	0	0	1	1	1	0	0	2	1	1	3	0	8	3	3	4	k__Bacteria; p__Proteobacteria; c__Alphaproteobacteria; o__Sphingomonadales; f__Sphingomonadaceae; g__Altererythrobacter; s__uncultured organism
OTU_604	2	7	2	4	4	4	3	5	13	1	4	3	3	10	3	1	15	7	k__Bacteria; p__Bacteroidetes; c__Bacteroidia; o__Bacteroidales; f__Rikenellaceae; g__Rikenellaceae RC9 gut group; s__uncultured rumen bacterium
OTU_2373	0	1	0	0	0	0	1	0	0	0	2	0	0	1	1	1	0	1	k__Bacteria; p__Bacteroidetes; c__Bacteroidia; o__Bacteroidales; f__Prevotellaceae
OTU_758	2	3	0	1	0	4	5	4	0	2	3	1	5	2	4	0	2	0	k__Bacteria; p__Firmicutes; c__Clostridia; o__Clostridiales; f__Clostridiales vadinBB60 group
OTU_1827	2	1	5	5	1	1	4	1	0	1	3	4	5	3	0	1	5	4	k__Bacteria; p__Firmicutes; c__Clostridia; o__Clostridiales; f__Ruminococcaceae; g__Ruminococcaceae UCG-013; s__uncultured rumen bacterium
OTU_1318	2	0	0	1	0	1	8	1	3	0	4	0	1	0	0	1	0	0	k__Bacteria; p__Proteobacteria; c__Deltaproteobacteria; o__Desulfovibrionales; f__Desulfovibrionaceae; g__uncultured; s__uncultured bacterium
OTU_245	8	30	10	31	19	9	4	8	53	3	15	14	72	25	14	7	19	32	k__Bacteria; p__Firmicutes; c__Clostridia; o__Clostridiales; f__Christensenellaceae; g__Christensenellaceae R-7 group; s__uncultured bacterium
OTU_4887	1	0	0	0	0	0	0	0	0	0	0	0	0	0	0	0	0	0	k__Bacteria; p__Firmicutes; c__Clostridia; o__Clostridiales
OTU_7763	1	0	0	0	0	0	0	0	0	0	0	0	0	0	0	0	0	0	k__Bacteria; p__Firmicutes; c__Clostridia; o__Clostridiales
OTU_393	2	1	14	7	14	13	1	8	3	3	25	1	9	28	9	4	5	4	k__Bacteria; p__Firmicutes; c__Clostridia; o__Clostridiales; f__Family XIII; g__Anaerovorax; s__uncultured rumen bacterium
OTU_5084	1	0	1	1	0	2	0	1	0	1	0	0	0	0	7	0	0	0	k__Bacteria; p__Bacteroidetes; c__Bacteroidia; o__Bacteroidales; f__Muribaculaceae; g__uncultured Bacteroidales bacterium; s__uncultured Bacteroidales bacterium
OTU_1784	1	0	2	8	1	4	0	0	3	2	7	0	1	0	1	0	3	0	k__Bacteria; p__Firmicutes; c__Clostridia; o__Clostridiales; f__Ruminococcaceae; g__Ruminococcus 1; s__uncultured rumen bacterium
OTU_102	0	3	0	0	0	2	1	0	0	0	0	0	0	0	1	0	1	1	k__Bacteria; p__Firmicutes; c__Clostridia; o__Clostridiales; f__Clostridiaceae 1; g__Clostridium sensu stricto 1; s__uncultured bacterium
OTU_1829	1	0	0	0	2	1	0	0	0	0	0	0	0	0	2	0	0	0	k__Bacteria; p__Firmicutes; c__Clostridia; o__Clostridiales; f__Ruminococcaceae; g__Ruminococcaceae UCG-014; s__uncultured rumen bacterium
OTU_2897	1	0	0	0	0	0	0	0	0	0	0	0	0	0	0	0	0	0	k__Bacteria; p__Firmicutes; c__Clostridia; o__Clostridiales
OTU_739	2	3	6	7	1	6	2	9	3	3	5	5	11	0	11	0	6	0	k__Bacteria; p__Bacteroidetes; c__Bacteroidia; o__Bacteroidales; f__Prevotellaceae; g__Alloprevotella; s__uncultured rumen bacterium
OTU_3997	1	2	1	3	2	8	3	3	3	5	11	3	3	7	0	3	5	1	k__Bacteria; p__Firmicutes; c__Clostridia; o__Clostridiales; f__Lachnospiraceae; g__[Eubacterium] ruminantium group; s__uncultured rumen bacterium
OTU_2755	1	1	0	2	0	0	0	0	0	0	0	0	0	0	0	0	1	0	k__Bacteria; p__Firmicutes; c__Clostridia; o__Clostridiales; f__Lachnospiraceae
OTU_1331	0	2	1	1	1	1	1	1	0	1	1	2	2	1	0	0	1	1	k__Bacteria; p__Firmicutes; c__Clostridia; o__Clostridiales; f__Ruminococcaceae; g__uncultured; s__uncultured rumen bacterium
OTU_10265	3	0	0	2	0	0	0	1	0	0	0	2	0	0	0	0	0	0	k__Bacteria; p__Firmicutes; c__Clostridia; o__Clostridiales; f__Lachnospiraceae; g__Shuttleworthia
OTU_644	0	0	18	3	28	0	0	4	0	2	13	2	0	14	7	15	11	2	k__Bacteria; p__Firmicutes; c__Clostridia; o__Clostridiales; f__Ruminococcaceae; g__Ruminococcaceae UCG-014; s__uncultured rumen bacterium
OTU_11041	2	4	0	3	0	0	3	0	0	0	2	0	0	1	0	0	2	1	k__Bacteria; p__Firmicutes; c__Clostridia; o__Clostridiales; f__Ruminococcaceae; g__Ruminococcaceae UCG-014; s__gut metagenome
OTU_1349	2	0	1	2	0	0	0	2	1	1	0	0	3	0	1	3	0	3	k__Bacteria; p__Firmicutes; c__Clostridia; o__Clostridiales; f__Lachnospiraceae; g__Lachnospiraceae FE2018 group; s__uncultured rumen bacterium
OTU_7920	1	1	2	0	0	1	0	0	2	2	0	1	0	3	2	1	0	3	k__Bacteria; p__Firmicutes; c__Clostridia; o__Clostridiales; f__Ruminococcaceae; g__Ruminococcus 2; s__uncultured rumen bacterium 5C0d-7
OTU_5746	2	2	0	1	0	0	0	0	0	0	1	0	0	2	0	1	1	0	k__Bacteria; p__Firmicutes; c__Clostridia; o__Clostridiales; f__Lachnospiraceae; g__Anaerostipes
OTU_3210	3	2	2	3	2	9	1	4	2	4	2	4	6	6	2	0	1	0	k__Bacteria; p__Firmicutes; c__Clostridia; o__Clostridiales; f__Ruminococcaceae; g__Ruminococcus 1
OTU_3332	1	1	4	0	1	2	0	1	0	0	3	0	0	3	2	5	0	9	k__Bacteria; p__Firmicutes; c__Clostridia; o__Clostridiales; f__Ruminococcaceae; g__Ruminococcaceae UCG-014
OTU_1461	1	0	1	1	4	3	0	0	1	0	0	1	0	1	0	1	0	0	k__Bacteria; p__Spirochaetes; c__Spirochaetia; o__Spirochaetales; f__Spirochaetaceae; g__Treponema 2
OTU_1266	2	2	3	2	0	2	4	9	0	3	3	3	0	0	2	6	0	0	k__Bacteria; p__Bacteroidetes; c__Bacteroidia; o__Bacteroidales; f__Prevotellaceae; g__uncultured; s__bacterium AC2042
OTU_4165	1	0	0	0	0	0	4	0	0	0	0	0	0	0	0	0	0	0	k__Bacteria; p__Firmicutes; c__Clostridia; o__Clostridiales; f__Lachnospiraceae
OTU_811	3	7	2	12	1	13	3	1	0	5	2	7	12	1	3	0	0	0	k__Bacteria; p__Firmicutes; c__Clostridia; o__Clostridiales; f__Lachnospiraceae; g__Coprococcus 2; s__uncultured rumen bacterium
OTU_1860	1	0	2	1	0	2	1	0	0	0	0	1	1	0	0	0	0	0	k__Bacteria; p__Firmicutes; c__Clostridia; o__Clostridiales; f__Lachnospiraceae
OTU_4138	1	2	0	2	4	0	2	0	6	1	0	0	1	2	0	3	6	0	k__Bacteria; p__Firmicutes; c__Clostridia; o__Clostridiales; f__Lachnospiraceae; g__Butyrivibrio 2
OTU_10634	0	4	14	7	20	4	11	8	2	3	16	4	12	49	3	11	21	10	k__Bacteria; p__Firmicutes; c__Clostridia; o__Clostridiales; f__Ruminococcaceae; g__Ruminococcaceae NK4A214 group
OTU_628	3	0	2	3	6	5	0	1	10	1	4	2	3	1	2	2	7	12	k__Bacteria; p__Firmicutes; c__Clostridia; o__Clostridiales; f__Lachnospiraceae; g__Acetitomaculum; s__uncultured rumen bacterium
OTU_359	7	7	4	33	5	20	11	12	6	13	11	26	24	14	5	0	0	0	k__Bacteria; p__Firmicutes; c__Clostridia; o__Clostridiales; f__Ruminococcaceae; g__Ruminococcus 1
OTU_3819	1	2	0	0	0	0	2	2	0	1	1	0	0	0	0	0	0	0	k__Bacteria; p__Firmicutes; c__Negativicutes; o__Selenomonadales; f__Veillonellaceae; g__uncultured
OTU_2070	0	0	0	0	0	0	0	0	0	0	0	1	0	0	0	0	0	0	k__Bacteria; p__Bacteroidetes; c__Bacteroidia; o__Bacteroidales; f__Muribaculaceae; g__uncultured bacterium; s__uncultured bacterium
OTU_9280	3	7	10	2	6	1	3	1	5	6	4	0	2	3	2	6	8	10	k__Bacteria; p__Bacteroidetes; c__Bacteroidia; o__Bacteroidales; f__Prevotellaceae; g__Prevotella 1
OTU_1044	3	0	7	0	6	1	0	1	1	8	4	2	0	1	3	4	0	0	k__Bacteria; p__Firmicutes; c__Clostridia; o__Clostridiales; f__Lachnospiraceae
OTU_3166	1	2	6	6	2	14	11	5	1	0	9	9	7	11	3	4	3	3	k__Bacteria; p__Bacteroidetes; c__Bacteroidia; o__Bacteroidales; f__Bacteroidales RF16 group
OTU_240	8	14	27	6	29	35	0	0	20	5	18	5	21	22	7	30	13	11	k__Bacteria; p__Bacteroidetes; c__Bacteroidia; o__Bacteroidales; f__Prevotellaceae; g__Prevotella 1
OTU_1005	2	4	4	1	3	4	2	1	35	2	8	2	8	6	3	9	3	17	k__Bacteria; p__Firmicutes; c__Clostridia; o__Clostridiales; f__Family XIII; g__[Eubacterium] nodatum group; s__uncultured rumen bacterium
OTU_2290	1	0	0	1	3	0	1	0	0	0	0	1	0	0	1	0	0	0	k__Bacteria; p__Firmicutes; c__Clostridia; o__Clostridiales; f__Lachnospiraceae; g__Sellimonas; s__Lachnoclostridium phocaeense
OTU_10281	0	0	0	0	0	0	0	0	0	0	1	0	0	0	0	0	0	0	k__Bacteria; p__Proteobacteria; c__Gammaproteobacteria; o__Betaproteobacteriales; f__Burkholderiaceae
OTU_1371	2	0	0	0	1	0	0	0	0	0	0	0	0	1	0	0	1	1	k__Bacteria; p__Firmicutes; c__Clostridia; o__Clostridiales; f__Lachnospiraceae; g__Lachnospiraceae ND3007 group; s__uncultured rumen bacterium
OTU_736	2	2	14	7	1	4	4	1	4	4	7	4	5	0	12	7	0	2	k__Bacteria; p__Bacteroidetes; c__Bacteroidia; o__Bacteroidales; f__Prevotellaceae; g__Prevotella 1
OTU_1742	2	0	1	2	0	1	0	1	7	0	0	1	0	0	0	0	1	2	k__Bacteria; p__Firmicutes; c__Clostridia; o__Clostridiales; f__Lachnospiraceae; g__Acetitomaculum; s__uncultured rumen bacterium 5C0d-23
OTU_10397	1	0	0	0	1	0	0	0	0	0	0	0	0	0	0	0	0	0	k__Bacteria; p__Firmicutes; c__Clostridia; o__Clostridiales; f__Lachnospiraceae
OTU_1115	2	5	0	1	2	1	1	0	1	4	0	1	0	0	0	0	0	0	k__Bacteria; p__Tenericutes; c__Mollicutes; o__Mollicutes RF39
OTU_391	2	3	1	1	0	0	0	0	3	2	5	0	2	0	0	0	1	1	k__Bacteria; p__Proteobacteria; c__Gammaproteobacteria; o__Aeromonadales; f__Succinivibrionaceae; g__Succinivibrio
OTU_261	0	10	6	23	10	11	11	13	28	14	15	18	5	7	2	8	7	9	k__Bacteria; p__Tenericutes; c__Mollicutes; o__Mollicutes RF39
OTU_9601	2	1	0	0	0	0	0	0	2	0	0	0	1	0	0	0	0	0	k__Bacteria; p__Firmicutes; c__Clostridia; o__Clostridiales; f__Lachnospiraceae
OTU_8194	1	1	0	0	0	0	0	1	1	0	0	2	0	2	0	0	1	0	k__Bacteria; p__Firmicutes; c__Clostridia; o__Clostridiales; f__Lachnospiraceae
OTU_2146	1	0	0	0	0	3	0	0	2	0	0	0	0	0	0	0	0	0	k__Bacteria; p__Bacteroidetes; c__Bacteroidia; o__Flavobacteriales; f__Flavobacteriaceae; g__Aequorivita
OTU_3742	1	0	0	0	0	0	0	0	0	0	0	0	0	0	0	0	0	0	k__Bacteria; p__Firmicutes; c__Clostridia; o__Clostridiales; f__Christensenellaceae; g__uncultured; s__uncultured bacterium
OTU_7631	1	0	0	0	0	0	0	0	0	2	0	0	0	2	0	0	0	0	k__Bacteria; p__Firmicutes; c__Clostridia; o__Clostridiales; f__Lachnospiraceae
OTU_1691	0	5	0	0	0	0	0	0	0	0	0	1	1	0	0	0	0	0	k__Bacteria; p__Actinobacteria; c__Coriobacteriia; o__Coriobacteriales; f__Atopobiaceae
OTU_2967	0	0	0	0	0	0	1	0	1	0	1	0	0	0	0	0	0	0	k__Bacteria; p__Firmicutes; c__Negativicutes; o__Selenomonadales; f__Veillonellaceae; g__Selenomonas 1; s__uncultured bacterium
OTU_727	1	3	11	6	6	21	0	1	3	2	10	0	4	0	0	0	1	1	k__Bacteria; p__Spirochaetes; c__Spirochaetia; o__Spirochaetales; f__Spirochaetaceae; g__Treponema 2; s__Treponema saccharophilum DSM 2985
OTU_3962	0	0	0	0	0	0	0	0	0	0	0	0	0	0	0	0	0	0	k__Bacteria; p__Proteobacteria; c__Alphaproteobacteria; o__Rhizobiales; f__Xanthobacteraceae; g__Bradyrhizobium
OTU_1541	3	0	2	6	1	1	0	1	2	0	1	3	0	0	1	3	3	1	k__Bacteria; p__Synergistetes; c__Synergistia; o__Synergistales; f__Synergistaceae; g__Fretibacterium; s__uncultured rumen bacterium
OTU_7977	1	2	0	0	1	0	2	0	0	0	1	0	0	0	0	0	0	0	k__Bacteria; p__Firmicutes; c__Clostridia; o__Clostridiales; f__Lachnospiraceae; g__Acetitomaculum; s__uncultured rumen bacterium
OTU_664	0	3	7	15	5	18	0	1	1	3	4	3	1	15	6	8	11	7	k__Bacteria; p__Firmicutes; c__Erysipelotrichia; o__Erysipelotrichales; f__Erysipelotrichaceae; g__Erysipelotrichaceae UCG-004; s__unidentified rumen bacterium RFN20
OTU_2051	1	1	0	1	1	0	1	0	0	1	0	0	0	0	1	0	0	1	k__Bacteria; p__Firmicutes; c__Clostridia; o__Clostridiales; f__Ruminococcaceae
OTU_598	4	10	4	8	1	6	3	3	5	1	5	5	2	2	3	1	3	1	k__Bacteria; p__Tenericutes; c__Mollicutes; o__Mollicutes RF39; f__uncultured bacterium; g__uncultured bacterium; s__uncultured bacterium
OTU_8374	1	0	0	0	0	0	0	0	3	5	0	6	1	0	0	0	0	0	k__Bacteria; p__Bacteroidetes; c__Bacteroidia; o__Bacteroidales; f__Prevotellaceae; g__Prevotella 7
OTU_10015	2	0	1	2	6	1	0	2	3	2	6	2	6	2	1	4	0	6	k__Bacteria; p__Firmicutes; c__Clostridia; o__Clostridiales; f__Ruminococcaceae; g__Ruminococcaceae UCG-001; s__uncultured bacterium
OTU_1506	2	1	0	2	0	0	0	0	0	0	0	0	3	0	1	2	3	1	k__Bacteria; p__Firmicutes; c__Clostridia; o__Clostridiales; f__Family XIII; g__Family XIII AD3011 group; s__uncultured rumen bacterium
OTU_1587	3	0	0	0	0	1	0	2	0	0	0	5	0	0	0	0	0	0	k__Bacteria; p__Firmicutes; c__Clostridia; o__Clostridiales; f__Ruminococcaceae
OTU_3976	2	0	0	0	0	0	1	8	1	4	0	1	0	3	2	4	0	0	k__Bacteria; p__Bacteroidetes; c__Bacteroidia; o__Bacteroidales; f__Prevotellaceae; g__Prevotella 7; s__uncultured bacterium
OTU_9547	1	0	0	2	1	0	0	2	0	0	0	1	0	0	4	0	2	0	k__Bacteria; p__Firmicutes; c__Clostridia; o__Clostridiales; f__Ruminococcaceae; g__Ruminococcaceae UCG-014
OTU_1736	2	1	1	1	1	2	1	2	0	2	0	1	1	0	0	0	0	3	k__Bacteria; p__Bacteroidetes; c__Bacteroidia; o__Bacteroidales; f__Muribaculaceae; g__uncultured bacterium; s__uncultured bacterium
OTU_1832	0	1	0	1	0	0	0	6	0	1	0	1	0	1	1	4	1	0	k__Bacteria; p__Firmicutes; c__Negativicutes; o__Selenomonadales; f__Veillonellaceae
OTU_2337	1	0	5	4	3	1	0	1	0	0	2	1	1	0	6	3	2	4	k__Bacteria; p__Tenericutes; c__Mollicutes; o__Mollicutes RF39; f__unidentified rumen bacterium RF9; g__unidentified rumen bacterium RF9; s__unidentified rumen bacterium RF9
OTU_1902	1	0	0	1	0	0	1	1	0	0	2	2	0	0	0	0	1	0	k__Bacteria; p__Firmicutes; c__Clostridia; o__Clostridiales; f__Lachnospiraceae
OTU_7964	2	2	0	1	0	0	0	1	0	2	1	1	0	0	1	0	1	0	k__Bacteria; p__Firmicutes; c__Clostridia; o__Clostridiales; f__Lachnospiraceae
OTU_7632	1	0	0	0	0	0	0	0	0	0	0	0	0	0	0	0	0	0	k__Bacteria; p__Firmicutes; c__Clostridia; o__Clostridiales; f__Lachnospiraceae
OTU_2234	4	4	3	4	4	6	3	6	0	9	1	4	3	10	3	5	3	5	k__Bacteria; p__Firmicutes; c__Clostridia; o__Clostridiales; f__Ruminococcaceae; g__Ruminococcaceae UCG-014; s__uncultured bacterium
OTU_1346	1	1	5	4	7	2	0	1	6	0	6	3	1	0	3	3	0	1	k__Bacteria; p__Tenericutes; c__Mollicutes; o__Mollicutes RF39
OTU_1196	1	1	0	4	0	4	1	0	0	0	1	2	2	0	5	0	0	3	k__Bacteria; p__Firmicutes; c__Clostridia; o__Clostridiales; f__Lachnospiraceae; g__[Eubacterium] ventriosum group; s__uncultured rumen bacterium
OTU_1998	1	0	0	0	0	2	1	0	0	0	1	0	0	0	8	0	0	1	k__Bacteria; p__Bacteroidetes; c__Bacteroidia; o__Bacteroidales; f__Muribaculaceae; g__uncultured bacterium; s__uncultured bacterium
OTU_1201	4	0	0	5	1	6	1	1	2	3	5	1	4	4	1	3	3	1	k__Bacteria; p__Firmicutes; c__Clostridia; o__Clostridiales; f__Ruminococcaceae
OTU_705	2	0	4	12	9	6	2	0	11	6	2	1	5	8	7	2	8	8	k__Bacteria; p__Firmicutes; c__Clostridia; o__Clostridiales; f__Lachnospiraceae; g__Shuttleworthia; s__uncultured bacterium
OTU_1063	0	0	2	0	6	0	0	2	0	0	1	0	0	1	1	0	3	0	k__Bacteria; p__Firmicutes; c__Clostridia; o__Clostridiales; f__Lachnospiraceae; g__[Ruminococcus] gnavus group
OTU_2116	0	0	0	0	0	0	1	0	0	1	2	0	0	0	0	0	0	0	k__Bacteria; p__Cyanobacteria; c__Melainabacteria; o__Gastranaerophilales
OTU_1458	2	1	2	1	4	0	0	4	2	2	2	0	0	1	2	2	2	2	k__Bacteria; p__Firmicutes; c__Clostridia; o__Clostridiales; f__Family XIII; g__Anaerovorax
OTU_643	1	1	4	20	1	0	0	0	11	0	5	1	0	0	0	28	1	0	k__Bacteria; p__Firmicutes; c__Bacilli; o__Lactobacillales; f__Lactobacillaceae; g__Lactobacillus
OTU_7735	1	0	0	0	0	0	0	0	0	0	1	0	0	2	0	0	0	0	k__Bacteria; p__Firmicutes; c__Clostridia; o__Clostridiales; f__Lachnospiraceae
OTU_724	5	5	13	4	14	14	1	3	18	5	13	2	23	3	0	0	4	1	k__Bacteria; p__Fibrobacteres; c__Fibrobacteria; o__Fibrobacterales; f__Fibrobacteraceae; g__Fibrobacter
OTU_1498	1	4	0	0	3	1	3	0	3	2	4	1	11	3	5	1	2	1	k__Bacteria; p__Bacteroidetes; c__Bacteroidia; o__Bacteroidales; f__Muribaculaceae; g__uncultured rumen bacterium; s__uncultured rumen bacterium
OTU_9668	2	1	1	0	0	0	0	0	0	0	0	2	0	0	0	0	0	1	k__Bacteria; p__Firmicutes; c__Clostridia; o__Clostridiales; f__Lachnospiraceae
OTU_572	1	6	3	7	3	1	6	2	10	1	5	6	13	3	3	7	8	6	k__Bacteria; p__Firmicutes; c__Erysipelotrichia; o__Erysipelotrichales; f__Erysipelotrichaceae
OTU_3804	1	0	4	0	2	1	4	1	0	0	0	0	2	0	0	0	0	0	k__Bacteria; p__Bacteroidetes; c__Bacteroidia; o__Bacteroidales; f__Muribaculaceae; g__uncultured rumen bacterium; s__uncultured rumen bacterium
OTU_1047	2	5	0	0	2	7	2	0	0	3	0	0	2	0	0	0	4	1	k__Bacteria; p__Firmicutes; c__Clostridia; o__Clostridiales; f__Ruminococcaceae; g__Ruminococcaceae UCG-013
OTU_1367	2	0	0	0	2	0	0	0	10	0	1	0	1	1	2	0	0	5	k__Bacteria; p__Firmicutes; c__Clostridia; o__Clostridiales; f__Lachnospiraceae; g__Acetitomaculum
OTU_6384	8	7	7	9	3	2	3	8	20	8	11	9	19	2	2	6	9	21	k__Bacteria; p__Firmicutes; c__Clostridia; o__Clostridiales; f__Lachnospiraceae
OTU_1460	0	2	1	0	1	0	2	1	10	1	0	0	1	1	3	4	0	1	k__Bacteria; p__Firmicutes; c__Clostridia; o__Clostridiales; f__Lachnospiraceae; g__Fusicatenibacter
OTU_7779	1	1	1	4	0	1	0	0	0	0	0	1	1	0	2	1	0	0	k__Bacteria; p__Patescibacteria; c__Saccharimonadia; o__Saccharimonadales; f__Saccharimonadaceae; g__Candidatus Saccharimonas; s__uncultured rumen bacterium
OTU_1109	2	2	8	8	4	4	5	3	1	2	5	2	1	7	3	4	6	1	k__Bacteria; p__Firmicutes; c__Erysipelotrichia; o__Erysipelotrichales; f__Erysipelotrichaceae; g__Erysipelotrichaceae UCG-004
OTU_5669	1	1	2	0	0	1	0	0	3	0	1	2	3	1	1	0	0	2	k__Bacteria; p__Patescibacteria; c__Saccharimonadia; o__Saccharimonadales; f__Saccharimonadaceae; g__Candidatus Saccharimonas
OTU_8550	1	0	0	0	0	0	0	0	0	0	1	0	0	0	0	2	0	0	k__Bacteria; p__Firmicutes; c__Clostridia; o__Clostridiales; f__Lachnospiraceae
OTU_2117	1	0	2	3	2	0	0	0	0	0	0	2	0	0	2	1	0	1	k__Bacteria; p__Tenericutes; c__Mollicutes; o__Mollicutes RF39; f__uncultured bacterium; g__uncultured bacterium; s__uncultured bacterium
OTU_9368	3	3	0	3	2	4	0	0	2	0	0	6	4	1	2	0	1	0	k__Bacteria; p__Firmicutes; c__Clostridia; o__Clostridiales; f__Lachnospiraceae; g__Lachnospiraceae UCG-006; s__uncultured rumen bacterium
OTU_522	6	10	3	1	6	5	5	2	8	4	19	4	6	4	3	2	5	5	k__Bacteria; p__Firmicutes; c__Clostridia; o__Clostridiales; f__Family XIII; g__Anaerovorax; s__uncultured rumen bacterium
OTU_1026	2	1	2	1	0	2	2	1	5	0	3	2	0	0	1	0	1	1	k__Bacteria; p__Firmicutes; c__Clostridia; o__Clostridiales; f__Lachnospiraceae; g__[Eubacterium] hallii group; s__unidentified rumen bacterium RF24
OTU_3966	1	0	0	0	0	0	0	1	0	0	0	0	0	0	0	0	0	0	k__Bacteria; p__Firmicutes; c__Clostridia; o__Clostridiales; f__Ruminococcaceae; g__Ruminococcus 1
OTU_1037	1	0	10	11	9	12	2	5	5	7	5	1	3	5	16	0	4	4	k__Bacteria; p__Bacteroidetes; c__Bacteroidia; o__Bacteroidales; f__Prevotellaceae; g__Prevotella 1; s__uncultured bacterium
OTU_494	0	3	1	4	12	8	1	3	5	1	1	5	3	8	2	8	6	9	k__Bacteria; p__Bacteroidetes; c__Bacteroidia; o__Bacteroidales; f__Rikenellaceae; g__Rikenellaceae RC9 gut group; s__uncultured bacterium
OTU_6530	1	1	2	0	0	0	7	2	1	0	2	0	0	9	0	2	2	0	k__Bacteria; p__Firmicutes; c__Clostridia; o__Clostridiales; f__Lachnospiraceae; g__[Ruminococcus] gauvreauii group
OTU_772	2	3	4	7	9	11	3	2	2	0	8	4	7	12	13	18	10	21	k__Bacteria; p__Bacteroidetes; c__Bacteroidia; o__Bacteroidales; f__Rikenellaceae; g__Rikenellaceae RC9 gut group; s__uncultured rumen bacterium
OTU_679	1	3	9	16	8	1	2	2	3	3	9	7	7	9	4	6	1	1	k__Bacteria; p__Firmicutes; c__Clostridia; o__Clostridiales; f__Lachnospiraceae
OTU_17	3	24	3	2	1	5	4	9	2	1	3	5	3	0	1	4	5	0	k__Bacteria; p__Firmicutes; c__Clostridia; o__Clostridiales; f__Peptostreptococcaceae; g__Romboutsia; s__uncultured bacterium
OTU_45	0	1	0	1	0	1	1	0	0	4	1	0	1	0	0	1	0	0	k__Bacteria; p__Firmicutes; c__Clostridia; o__Clostridiales; f__Ruminococcaceae; g__Ruminococcaceae UCG-013; s__uncultured bacterium
OTU_1140	0	0	1	3	3	0	0	0	4	0	1	0	0	0	3	1	1	0	k__Bacteria; p__Actinobacteria; c__Actinobacteria; o__Bifidobacteriales; f__Bifidobacteriaceae; g__Bifidobacterium; s__Bifidobacterium longum subsp. longum
OTU_1575	0	0	0	1	0	4	0	0	3	1	1	1	6	0	0	0	0	0	k__Bacteria; p__Bacteroidetes; c__Bacteroidia; o__Bacteroidales; f__Prevotellaceae; g__Alloprevotella
OTU_634	3	1	2	5	15	9	2	4	5	2	7	1	2	2	3	8	12	14	k__Bacteria; p__Firmicutes; c__Clostridia; o__Clostridiales; f__Defluviitaleaceae; g__Defluviitaleaceae UCG-011; s__uncultured bacterium
OTU_8918	1	0	0	0	2	0	0	0	0	1	1	0	2	1	0	1	0	2	k__Bacteria; p__Firmicutes; c__Clostridia; o__Clostridiales; f__Ruminococcaceae; g__Ruminococcaceae UCG-014; s__uncultured rumen bacterium
OTU_3103	0	0	4	1	3	3	4	2	8	5	9	2	8	19	2	2	9	9	k__Bacteria; p__Firmicutes; c__Clostridia; o__Clostridiales
OTU_4806	0	0	0	0	0	0	2	0	0	0	0	0	0	0	0	0	0	0	k__Bacteria; p__Firmicutes; c__Clostridia; o__Clostridiales; f__Ruminococcaceae; g__Ruminococcus 1; s__uncultured bacterium
OTU_10978	0	0	0	0	0	1	2	0	0	0	0	0	0	0	0	0	0	0	k__Bacteria; p__Bacteroidetes; c__Bacteroidia; o__Bacteroidales; f__Prevotellaceae; g__Prevotella 1; s__uncultured rumen bacterium
OTU_2414	1	0	2	0	1	1	0	0	9	0	0	1	0	1	2	2	1	12	k__Bacteria; p__Firmicutes; c__Clostridia; o__Clostridiales; f__Lachnospiraceae
OTU_10336	0	0	0	0	0	1	0	0	0	0	0	0	0	0	0	0	0	0	k__Bacteria; p__Bacteroidetes; c__Bacteroidia; o__Bacteroidales; f__Prevotellaceae
OTU_828	2	2	0	1	0	6	9	0	5	0	4	0	0	4	1	2	3	12	k__Bacteria; p__Bacteroidetes; c__Bacteroidia; o__Bacteroidales; f__Rikenellaceae; g__U29-B03; s__uncultured rumen bacterium
OTU_7556	0	2	0	0	0	0	0	0	0	0	0	0	0	0	0	0	0	0	k__Bacteria; p__Firmicutes; c__Clostridia; o__Clostridiales
OTU_9394	1	1	0	0	0	0	0	0	0	0	0	0	1	1	1	0	0	0	k__Bacteria; p__Firmicutes; c__Clostridia; o__Clostridiales
OTU_2586	0	0	1	0	0	0	0	0	0	0	0	0	0	0	0	0	0	0	k__Bacteria; p__Spirochaetes; c__Spirochaetia; o__Spirochaetales; f__Spirochaetaceae; g__Treponema 2; s__uncultured Treponema sp.
OTU_1403	1	1	2	0	0	0	2	4	0	0	7	0	0	0	0	0	1	0	k__Bacteria; p__Elusimicrobia; c__Elusimicrobia; o__Elusimicrobiales; f__Elusimicrobiaceae; g__Elusimicrobium
OTU_1798	2	0	0	0	0	1	1	0	1	0	1	7	0	0	1	0	0	0	k__Bacteria; p__Tenericutes; c__Mollicutes; o__Mollicutes RF39
OTU_2058	0	0	0	0	0	0	0	0	0	0	0	0	2	0	0	0	1	1	k__Bacteria; p__Firmicutes; c__Clostridia; o__Clostridiales; f__Ruminococcaceae
OTU_2394	3	1	0	1	0	3	1	0	0	0	0	0	0	0	0	0	0	0	k__Bacteria; p__Firmicutes; c__Clostridia; o__Clostridiales; f__Peptococcaceae; g__uncultured; s__uncultured rumen bacterium
OTU_3734	0	0	0	0	0	0	0	0	0	3	0	0	1	0	0	0	0	0	k__Bacteria; p__Firmicutes; c__Clostridia; o__Clostridiales; f__Lachnospiraceae
OTU_415	2	10	2	6	4	4	1	4	12	5	1	3	5	5	15	14	10	3	k__Bacteria; p__Firmicutes; c__Clostridia; o__Clostridiales; f__Lachnospiraceae; g__Blautia
OTU_375	2	3	8	5	11	10	5	7	2	2	4	3	12	8	4	7	11	15	k__Bacteria; p__Firmicutes; c__Clostridia; o__Clostridiales; f__Ruminococcaceae; g__Oscillospira
OTU_2318	1	1	16	2	2	2	6	8	6	6	12	3	1	10	16	11	2	0	k__Bacteria; p__Bacteroidetes; c__Bacteroidia; o__Bacteroidales; f__Prevotellaceae; g__Prevotella 1
OTU_2491	0	0	0	2	0	0	0	0	0	0	2	1	0	0	1	0	0	0	k__Bacteria; p__Firmicutes; c__Clostridia; o__Clostridiales; f__Ruminococcaceae; g__Ruminococcaceae UCG-009; s__uncultured rumen bacterium
OTU_7481	1	0	0	0	0	0	0	0	0	2	0	0	0	0	0	0	0	0	k__Bacteria; p__Firmicutes; c__Clostridia; o__Clostridiales; f__Family XIII; g__[Eubacterium] nodatum group
OTU_2026	1	5	6	3	2	0	0	1	4	0	4	1	0	0	2	1	3	2	k__Bacteria; p__Tenericutes; c__Mollicutes; o__Mollicutes RF39
OTU_1399	0	0	0	1	0	0	0	0	1	0	1	0	2	0	0	0	0	0	k__Bacteria; p__Epsilonbacteraeota; c__Campylobacteria; o__Campylobacterales; f__Campylobacteraceae; g__Campylobacter
OTU_8187	2	7	3	12	0	0	10	8	1	5	1	2	3	0	3	1	0	0	k__Bacteria; p__Firmicutes; c__Clostridia; o__Clostridiales; f__Lachnospiraceae
OTU_1247	2	1	0	0	0	2	1	0	0	0	4	0	0	2	0	2	0	0	k__Bacteria; p__Bacteroidetes; c__Bacteroidia; o__Bacteroidales; f__Bacteroidales BS11 gut group
OTU_6633	2	0	1	0	0	2	0	3	0	4	0	2	1	2	1	1	1	0	k__Bacteria; p__Firmicutes; c__Clostridia; o__Clostridiales; f__Ruminococcaceae
OTU_5774	1	1	1	0	0	0	0	0	0	0	0	0	2	0	0	1	1	0	k__Bacteria; p__Firmicutes; c__Erysipelotrichia; o__Erysipelotrichales; f__Erysipelotrichaceae; g__uncultured; s__uncultured rumen bacterium
OTU_547	0	5	7	3	13	2	2	0	9	1	8	0	2	4	5	0	8	10	k__Bacteria; p__Spirochaetes; c__Spirochaetia; o__Spirochaetales; f__Spirochaetaceae; g__Treponema 2; s__Treponema sp. OC1
OTU_4376	2	0	2	0	0	0	2	0	2	2	1	4	2	0	0	3	0	0	k__Bacteria; p__Bacteroidetes; c__Bacteroidia; o__Bacteroidales; f__Prevotellaceae; g__Prevotella 7
OTU_1261	1	1	3	3	3	0	0	0	8	0	0	5	1	0	0	2	1	6	k__Bacteria; p__Tenericutes; c__Mollicutes; o__Mollicutes RF39; f__uncultured rumen bacterium; g__uncultured rumen bacterium; s__uncultured rumen bacterium
OTU_3801	7	3	0	0	0	0	0	1	0	2	1	2	0	0	0	1	0	0	k__Bacteria; p__Firmicutes; c__Clostridia; o__Clostridiales; f__Lachnospiraceae; g__Shuttleworthia; s__uncultured Lachnospiraceae bacterium
OTU_6342	1	0	0	0	0	0	0	0	0	0	0	0	0	0	0	0	0	0	k__Bacteria; p__Firmicutes; c__Clostridia; o__Clostridiales; f__Lachnospiraceae
OTU_7671	3	5	0	0	0	1	2	13	0	9	0	1	2	15	3	5	3	0	k__Bacteria; p__Firmicutes; c__Clostridia; o__Clostridiales
OTU_1726	0	0	1	0	0	0	0	0	0	0	0	0	0	0	0	0	0	0	k__Bacteria; p__Firmicutes; c__Clostridia; o__Clostridiales; f__Ruminococcaceae; g__Ruminiclostridium 6; s__uncultured bacterium
OTU_10273	0	0	0	0	0	0	0	0	0	0	0	0	0	0	0	0	0	0	k__Bacteria; p__Firmicutes; c__Clostridia; o__Clostridiales; f__Lachnospiraceae
OTU_10190	2	1	0	1	0	2	2	5	0	1	0	1	0	1	0	2	2	1	k__Bacteria; p__Firmicutes; c__Clostridia; o__Clostridiales; f__Lachnospiraceae
OTU_7881	0	0	0	0	0	0	0	0	0	1	0	1	1	0	0	0	0	1	k__Bacteria; p__Firmicutes; c__Clostridia; o__Clostridiales; f__Lachnospiraceae; g__Acetitomaculum; s__uncultured rumen bacterium
OTU_1679	1	0	0	0	0	0	0	0	0	0	2	0	0	0	1	0	0	1	k__Bacteria; p__Firmicutes; c__Clostridia; o__Clostridiales; f__Family XIII; g__[Eubacterium] brachy group
OTU_4875	0	0	1	1	4	0	0	0	11	0	1	2	0	1	0	1	3	8	k__Bacteria; p__Firmicutes; c__Clostridia; o__Clostridiales; f__Lachnospiraceae; g__Acetitomaculum; s__uncultured rumen bacterium
OTU_948	0	3	2	5	8	5	5	6	2	0	3	1	8	2	0	1	1	0	k__Bacteria; p__Bacteroidetes; c__Bacteroidia; o__Bacteroidales; f__Muribaculaceae
OTU_2031	0	0	1	0	1	0	0	0	1	0	0	0	0	0	0	0	0	0	k__Bacteria; p__Firmicutes; c__Clostridia; o__Clostridiales; f__Ruminococcaceae; g__Ruminococcaceae UCG-005; s__uncultured Ruminococcaceae bacterium
OTU_11097	3	0	0	1	0	0	0	1	0	0	0	2	0	0	0	0	0	0	k__Bacteria; p__Firmicutes; c__Clostridia; o__Clostridiales; f__Lachnospiraceae
OTU_4491	2	11	3	6	15	7	2	1	6	7	2	2	10	4	6	6	14	10	k__Bacteria; p__Firmicutes; c__Clostridia; o__Clostridiales; f__Ruminococcaceae; g__Ruminococcaceae UCG-005
OTU_7530	2	0	0	0	0	0	0	0	0	0	1	0	0	0	0	0	0	0	k__Bacteria; p__Firmicutes; c__Clostridia; o__Clostridiales; f__Lachnospiraceae; g__Moryella
OTU_1088	2	5	4	0	0	1	5	2	0	1	3	0	1	0	2	1	1	0	k__Bacteria; p__Cyanobacteria; c__Melainabacteria; o__Gastranaerophilales
OTU_10967	1	0	0	1	3	2	0	0	0	2	0	0	0	3	0	0	0	0	k__Bacteria; p__Firmicutes; c__Clostridia; o__Clostridiales; f__Family XIII; g__Anaerovorax
OTU_2679	1	0	1	0	0	0	0	0	0	0	2	1	1	0	1	0	0	1	k__Bacteria; p__Firmicutes; c__Clostridia; o__Clostridiales; f__Lachnospiraceae
OTU_2572	1	0	1	0	0	0	0	0	8	0	0	1	0	0	0	1	0	1	k__Bacteria; p__Firmicutes; c__Clostridia; o__Clostridiales; f__Lachnospiraceae; g__Marvinbryantia; s__uncultured rumen bacterium
OTU_5620	3	2	1	2	0	1	3	0	1	0	1	0	0	2	0	2	0	1	k__Bacteria; p__Firmicutes; c__Clostridia; o__Clostridiales; f__Lachnospiraceae
OTU_1811	0	0	3	0	0	0	0	0	0	0	1	1	1	0	0	2	0	0	k__Bacteria; p__Spirochaetes; c__Spirochaetia; o__Spirochaetales; f__Spirochaetaceae; g__Treponema 2
OTU_10647	1	0	1	1	1	0	3	1	0	0	2	0	1	2	0	0	2	0	k__Bacteria; p__Firmicutes; c__Clostridia; o__Clostridiales; f__Lachnospiraceae; g__[Ruminococcus] gauvreauii group
OTU_6901	1	4	0	0	0	2	1	1	0	3	2	1	1	8	2	7	6	4	k__Bacteria; p__Firmicutes; c__Clostridia; o__Clostridiales; f__Ruminococcaceae; g__Ruminococcaceae NK4A214 group
OTU_486	1	1	16	10	24	6	7	8	2	7	5	6	2	2	8	3	35	35	k__Bacteria; p__Bacteroidetes; c__Bacteroidia; o__Bacteroidales; f__Prevotellaceae; g__Prevotellaceae UCG-003; s__uncultured rumen bacterium
OTU_7758	1	0	1	0	0	0	0	0	0	0	0	1	0	0	0	0	0	1	k__Bacteria; p__Bacteroidetes; c__Bacteroidia; o__Bacteroidales; f__Bacteroidaceae; g__Bacteroides; s__Bacteroides acidifaciens
OTU_2250	1	5	3	4	0	1	2	2	5	3	3	1	1	6	4	0	1	1	k__Bacteria; p__Firmicutes; c__Clostridia; o__Clostridiales; f__Lachnospiraceae
OTU_1039	1	0	2	5	9	3	0	0	0	0	1	0	0	5	1	0	3	2	k__Bacteria; p__Firmicutes; c__Erysipelotrichia; o__Erysipelotrichales; f__Erysipelotrichaceae; g__Erysipelotrichaceae UCG-004
OTU_640	2	0	5	0	10	1	1	1	9	3	5	1	6	6	1	6	3	11	k__Bacteria; p__Firmicutes; c__Clostridia; o__Clostridiales; f__Family XIII; g__[Eubacterium] nodatum group; s__uncultured rumen bacterium
OTU_8769	1	0	0	0	0	0	0	0	0	0	0	0	0	0	1	1	0	0	k__Bacteria; p__Firmicutes; c__Clostridia; o__Clostridiales; f__Lachnospiraceae; g__Lachnospiraceae NK3A20 group
OTU_6536	2	2	1	0	0	0	1	1	2	1	0	0	0	0	0	0	1	0	k__Bacteria; p__Firmicutes; c__Clostridia; o__Clostridiales; f__Lachnospiraceae
OTU_10351	0	0	0	1	1	0	2	0	0	0	0	0	1	1	3	9	1	0	k__Bacteria; p__Firmicutes; c__Clostridia; o__Clostridiales; f__Ruminococcaceae; g__Ruminococcaceae UCG-014
OTU_1366	2	5	0	1	0	9	3	5	0	6	1	1	1	0	2	4	1	0	k__Bacteria; p__Firmicutes; c__Negativicutes; o__Selenomonadales; f__Veillonellaceae
OTU_1651	1	0	0	0	0	0	0	0	0	0	0	0	0	0	0	0	0	0	k__Bacteria; p__Firmicutes; c__Clostridia; o__Clostridiales; f__Ruminococcaceae
OTU_1432	0	0	19	8	14	2	0	7	0	3	5	4	3	5	2	3	2	11	k__Bacteria; p__Bacteroidetes; c__Bacteroidia; o__Bacteroidales; f__Prevotellaceae; g__Prevotellaceae UCG-003; s__uncultured rumen bacterium
OTU_1205	1	0	1	0	0	5	0	1	0	0	1	1	0	1	0	1	1	1	k__Bacteria; p__Firmicutes; c__Clostridia; o__Clostridiales
OTU_2285	1	0	0	1	0	0	0	0	0	2	1	1	0	0	1	0	0	5	k__Bacteria; p__Firmicutes; c__Erysipelotrichia; o__Erysipelotrichales; f__Erysipelotrichaceae; g__Dubosiella; s__uncultured bacterium
OTU_3929	3	0	0	0	0	0	0	0	0	0	0	0	0	0	0	0	0	0	k__Bacteria; p__Actinobacteria; c__Actinobacteria; o__Pseudonocardiales; f__Pseudonocardiaceae; g__Saccharopolyspora; s__uncultured bacterium
OTU_1129	1	3	6	1	8	6	1	3	6	4	13	0	10	6	11	10	8	21	k__Bacteria; p__Firmicutes; c__Clostridia; o__Clostridiales; f__Christensenellaceae; g__Christensenellaceae R-7 group
OTU_1051	1	4	1	7	15	0	2	1	0	0	3	2	1	12	2	3	4	1	k__Bacteria; p__Bacteroidetes; c__Bacteroidia; o__Bacteroidales; f__Prevotellaceae; g__Prevotellaceae UCG-003; s__uncultured rumen bacterium
OTU_41	0	2	149	6	382	40	20	6	11	5	22	5	47	11	85	71	92	84	k__Bacteria; p__Firmicutes; c__Negativicutes; o__Selenomonadales; f__Acidaminococcaceae; g__Succiniclasticum; s__uncultured rumen bacterium
OTU_637	1	0	3	3	12	3	8	0	13	5	2	8	7	3	7	4	6	19	k__Bacteria; p__Bacteroidetes; c__Bacteroidia; o__Bacteroidales; f__Prevotellaceae
OTU_883	4	0	0	7	1	16	9	0	0	5	3	5	0	4	9	0	2	3	k__Bacteria; p__Firmicutes; c__Erysipelotrichia; o__Erysipelotrichales; f__Erysipelotrichaceae; g__Erysipelotrichaceae UCG-004
OTU_358	2	5	4	8	6	8	7	6	4	5	8	2	3	44	8	11	13	8	k__Bacteria; p__Bacteroidetes; c__Bacteroidia; o__Bacteroidales; f__Rikenellaceae; g__Rikenellaceae RC9 gut group; s__uncultured bacterium
OTU_10533	2	0	0	0	0	0	0	1	0	2	0	0	0	3	1	1	0	0	k__Bacteria; p__Bacteroidetes; c__Bacteroidia; o__Bacteroidales; f__Prevotellaceae; g__Prevotella 7; s__uncultured bacterium
OTU_4540	0	1	0	0	0	0	0	0	0	2	0	0	0	0	0	0	0	0	k__Bacteria; p__Firmicutes; c__Clostridia; o__Clostridiales; f__Lachnospiraceae
OTU_1066	2	1	2	0	6	1	0	0	3	1	0	0	4	0	0	0	1	3	k__Bacteria; p__Firmicutes; c__Clostridia; o__Clostridiales; f__Lachnospiraceae; g__Lachnospiraceae NK3A20 group; s__uncultured rumen bacterium
OTU_1666	1	1	0	2	0	1	0	1	0	4	0	2	0	0	0	1	0	0	k__Bacteria; p__Bacteroidetes; c__Bacteroidia; o__Bacteroidales; f__Prevotellaceae
OTU_10970	0	0	0	0	1	0	0	0	0	1	0	0	0	0	0	0	1	0	k__Bacteria; p__Firmicutes; c__Clostridia; o__Clostridiales; f__Lachnospiraceae
OTU_1714	1	0	2	1	2	1	0	0	0	0	2	0	0	3	1	0	0	2	k__Bacteria; p__Firmicutes; c__Clostridia; o__Clostridiales; f__Ruminococcaceae; g__Ruminococcaceae UCG-005
OTU_3907	6	2	0	0	0	0	0	0	0	1	1	2	1	0	0	0	0	0	k__Bacteria; p__Firmicutes; c__Negativicutes; o__Selenomonadales; f__Veillonellaceae; g__Dialister
OTU_1370	1	1	1	0	2	1	1	0	1	0	0	2	2	0	1	2	2	0	k__Bacteria; p__Firmicutes; c__Erysipelotrichia; o__Erysipelotrichales; f__Erysipelotrichaceae; g__Asteroleplasma; s__uncultured rumen bacterium
OTU_9384	2	0	0	0	0	0	0	0	0	0	0	0	0	0	0	0	0	0	k__Bacteria; p__Bacteroidetes; c__Bacteroidia; o__Bacteroidales; f__Prevotellaceae; g__Prevotella 1
OTU_2162	2	0	0	2	2	0	0	1	1	0	1	2	2	0	0	0	2	0	k__Bacteria; p__Firmicutes; c__Erysipelotrichia; o__Erysipelotrichales; f__Erysipelotrichaceae; g__uncultured
OTU_784	0	2	5	4	3	3	3	2	2	0	2	1	5	0	1	0	1	2	k__Bacteria; p__Bacteroidetes; c__Bacteroidia; o__Bacteroidales; f__Prevotellaceae; g__Prevotella 1
OTU_4516	0	0	1	1	5	1	0	4	1	1	2	7	11	10	9	12	14	6	k__Bacteria; p__Firmicutes; c__Clostridia; o__Clostridiales; f__Ruminococcaceae; g__Ruminococcaceae UCG-014; s__uncultured rumen bacterium
OTU_1846	1	2	1	1	0	1	0	1	0	4	0	1	0	1	2	1	0	0	k__Bacteria; p__Firmicutes; c__Clostridia; o__Clostridiales; f__Lachnospiraceae
OTU_1955	1	0	0	0	0	2	0	0	0	0	0	0	0	0	0	0	0	0	k__Bacteria; p__Spirochaetes; c__Spirochaetia; o__Spirochaetales; f__Spirochaetaceae; g__Treponema 2
OTU_8051	1	1	2	5	2	0	0	0	0	0	1	0	0	0	0	0	0	0	k__Bacteria; p__Firmicutes; c__Clostridia; o__Clostridiales; f__Lachnospiraceae; g__Shuttleworthia; s__uncultured bacterium
OTU_2033	1	0	1	0	0	0	0	0	0	0	0	0	1	0	2	2	2	1	k__Bacteria; p__Proteobacteria; c__Alphaproteobacteria; o__Rhodobacterales; f__Rhodobacteraceae
OTU_7535	1	2	0	2	0	0	3	0	0	3	3	1	1	3	0	1	1	0	k__Bacteria; p__Firmicutes; c__Clostridia; o__Clostridiales; f__Ruminococcaceae; g__Ruminococcaceae UCG-002; s__uncultured bacterium
OTU_6275	0	1	0	0	2	1	0	0	0	0	1	0	0	0	0	0	1	3	k__Bacteria; p__Firmicutes; c__Clostridia; o__Clostridiales; f__Ruminococcaceae; g__Ruminococcus 2
OTU_465	4	3	6	7	5	18	3	6	8	1	10	4	6	5	2	5	0	9	k__Bacteria; p__Firmicutes; c__Clostridia; o__Clostridiales; f__Defluviitaleaceae; g__Defluviitaleaceae UCG-011
OTU_1603	2	2	1	1	2	3	1	0	2	0	0	2	1	0	0	0	2	0	k__Bacteria; p__Firmicutes; c__Clostridia; o__Clostridiales
OTU_9712	1	2	2	1	9	1	0	0	1	0	1	2	0	5	3	3	4	6	k__Bacteria; p__Firmicutes; c__Clostridia; o__Clostridiales; f__Ruminococcaceae
OTU_1573	0	0	1	1	3	3	2	0	1	6	3	3	1	2	2	2	2	2	k__Bacteria; p__Bacteroidetes; c__Bacteroidia; o__Bacteroidales; f__Prevotellaceae; g__Prevotellaceae NK3B31 group; s__uncultured rumen bacterium
OTU_6214	2	2	0	5	1	1	0	2	1	0	3	1	3	0	0	0	1	0	k__Bacteria; p__Patescibacteria; c__Saccharimonadia; o__Saccharimonadales; f__Saccharimonadaceae; g__Candidatus Saccharimonas
OTU_10035	0	0	0	1	3	0	0	0	1	1	1	0	1	1	1	0	0	0	k__Bacteria; p__Firmicutes; c__Clostridia; o__Clostridiales; f__Lachnospiraceae; g__Acetitomaculum
OTU_2779	0	0	0	0	0	0	0	0	0	1	0	0	0	0	0	0	0	0	k__Bacteria; p__Firmicutes; c__Clostridia; o__Clostridiales; f__Lachnospiraceae
OTU_7816	1	0	0	0	0	0	0	0	0	1	0	0	0	1	0	0	0	0	k__Bacteria; p__Proteobacteria; c__Deltaproteobacteria; o__Desulfobacterales; f__Desulfobulbaceae; g__Desulfobulbus; s__uncultured rumen bacterium
OTU_9662	2	0	0	1	0	1	0	0	3	0	2	0	0	0	1	1	0	0	k__Bacteria; p__Firmicutes; c__Clostridia; o__Clostridiales; f__Family XIII; g__[Eubacterium] nodatum group
OTU_8433	1	0	0	0	0	0	0	0	0	0	0	0	1	1	0	0	1	1	k__Bacteria; p__Firmicutes; c__Clostridia; o__Clostridiales
OTU_9661	3	0	0	0	2	0	0	0	0	0	0	0	0	0	0	0	0	0	k__Bacteria; p__Firmicutes; c__Clostridia; o__Clostridiales
OTU_250	2	1	25	22	20	11	4	7	10	1	22	14	13	4	17	22	18	35	k__Bacteria; p__Firmicutes; c__Clostridia; o__Clostridiales; f__Christensenellaceae; g__Christensenellaceae R-7 group; s__uncultured rumen bacterium 4C0d-15
OTU_1165	1	0	0	0	2	4	2	0	0	4	0	1	1	0	0	0	2	0	k__Bacteria; p__Firmicutes; c__Erysipelotrichia; o__Erysipelotrichales; f__Erysipelotrichaceae; g__Erysipelotrichaceae UCG-004
OTU_917	1	1	1	6	0	13	7	2	0	3	5	4	2	1	3	0	1	0	k__Bacteria; p__Firmicutes; c__Clostridia; o__Clostridiales; f__Lachnospiraceae; g__Anaerosporobacter; s__uncultured bacterium
OTU_7406	1	2	0	0	3	4	1	0	3	0	0	1	0	5	5	8	2	1	k__Bacteria; p__Bacteroidetes; c__Bacteroidia; o__Bacteroidales; f__Prevotellaceae; g__Prevotella 7
OTU_7579	1	2	2	2	2	3	4	3	1	0	4	1	1	0	1	2	2	0	k__Bacteria; p__Firmicutes; c__Clostridia; o__Clostridiales; f__Lachnospiraceae; g__Lachnospiraceae UCG-010; s__uncultured rumen bacterium
OTU_2724	3	1	3	2	2	3	1	2	0	2	2	2	0	0	1	1	0	1	k__Bacteria; p__Tenericutes; c__Mollicutes; o__Mollicutes RF39; f__uncultured rumen bacterium; g__uncultured rumen bacterium; s__uncultured rumen bacterium
OTU_2520	2	0	0	0	0	0	0	0	0	0	0	1	0	0	0	0	0	0	k__Bacteria; p__Spirochaetes; c__Spirochaetia; o__Spirochaetales; f__Spirochaetaceae; g__Treponema 2
OTU_1463	0	1	0	1	1	0	0	0	0	2	0	0	1	0	3	2	4	2	k__Bacteria; p__Firmicutes; c__Erysipelotrichia; o__Erysipelotrichales; f__Erysipelotrichaceae
OTU_847	0	0	0	0	0	2	0	0	0	1	0	0	0	0	0	1	2	1	k__Bacteria; p__Firmicutes; c__Negativicutes; o__Selenomonadales; f__Veillonellaceae; g__Dialister; s__gut metagenome
OTU_2063	0	1	0	2	2	0	0	0	1	0	1	0	1	0	0	0	0	0	k__Bacteria; p__Firmicutes; c__Bacilli; o__Lactobacillales; f__Streptococcaceae; g__Streptococcus; s__Streptococcus pneumoniae
OTU_2268	0	0	0	0	1	0	0	0	0	0	0	0	0	0	0	0	0	0	k__Bacteria; p__Tenericutes; c__Mollicutes; o__Mollicutes RF39
OTU_2021	1	0	0	1	0	0	0	0	0	0	2	0	0	0	0	0	0	1	k__Bacteria; p__Bacteroidetes; c__Bacteroidia; o__Bacteroidales; f__F082
OTU_9907	1	0	0	0	0	0	0	0	0	0	0	0	0	0	0	0	0	0	k__Bacteria; p__Firmicutes; c__Clostridia; o__Clostridiales; f__Lachnospiraceae
OTU_10467	1	0	0	0	0	1	0	4	0	2	0	4	0	3	2	2	0	0	k__Bacteria; p__Bacteroidetes; c__Bacteroidia; o__Bacteroidales; f__Prevotellaceae; g__Prevotella 1
OTU_8190	2	3	0	2	1	1	0	4	4	1	3	3	1	0	0	5	1	2	k__Bacteria; p__Firmicutes; c__Clostridia; o__Clostridiales; f__Lachnospiraceae; g__Howardella; s__uncultured rumen bacterium
OTU_2854	2	1	8	2	17	6	2	2	2	1	2	0	3	0	6	16	5	6	k__Bacteria; p__Firmicutes; c__Clostridia; o__Clostridiales; f__Ruminococcaceae; g__Ruminococcaceae UCG-005; s__uncultured rumen bacterium
OTU_6222	2	0	0	0	0	4	3	3	0	1	1	1	1	5	2	1	2	1	k__Bacteria; p__Bacteroidetes; c__Bacteroidia; o__Bacteroidales; f__Prevotellaceae; g__Prevotella 1
OTU_9390	0	0	0	0	0	0	0	0	0	0	0	0	0	1	0	0	0	0	k__Bacteria; p__Firmicutes; c__Clostridia; o__Clostridiales; f__Lachnospiraceae
OTU_897	1	4	15	7	15	21	4	9	3	9	4	5	2	5	9	8	5	2	k__Bacteria; p__Bacteroidetes; c__Bacteroidia; o__Bacteroidales; f__Prevotellaceae
OTU_1739	1	0	0	0	0	0	3	0	0	0	1	0	0	1	0	3	0	0	k__Bacteria; p__Firmicutes; c__Clostridia; o__Clostridiales; f__Lachnospiraceae; g__Lachnospiraceae UCG-008; s__uncultured rumen bacterium
OTU_1282	0	1	3	2	2	6	2	0	7	1	1	1	1	5	0	4	1	11	k__Bacteria; p__Firmicutes; c__Clostridia; o__Clostridiales; f__Family XIII; g__Family XIII AD3011 group; s__uncultured rumen bacterium 3C0d-17
OTU_3494	0	0	0	0	0	0	0	0	0	1	1	0	1	0	0	0	0	0	k__Bacteria; p__Firmicutes; c__Clostridia; o__Clostridiales; f__Lachnospiraceae; g__Butyrivibrio 2; s__uncultured rumen bacterium
OTU_2003	0	0	0	0	0	0	0	0	0	0	1	0	1	0	0	0	0	0	k__Bacteria; p__Firmicutes; c__Negativicutes; o__Selenomonadales; f__Acidaminococcaceae; g__Phascolarctobacterium; s__uncultured organism
OTU_8185	1	0	0	0	0	0	0	0	0	0	0	0	0	0	0	0	0	0	k__Bacteria; p__Firmicutes; c__Clostridia; o__Clostridiales; f__Lachnospiraceae
OTU_1313	2	0	0	0	4	1	0	0	2	0	0	1	2	0	2	1	1	0	k__Bacteria; p__Spirochaetes; c__Spirochaetia; o__Spirochaetales; f__Spirochaetaceae; g__Treponema 2
OTU_3932	1	0	0	0	0	0	0	0	1	0	0	0	0	0	0	0	0	0	k__Bacteria; p__Firmicutes; c__Clostridia; o__Clostridiales; f__Lachnospiraceae; g__Butyrivibrio 2; s__uncultured rumen bacterium
OTU_9832	2	0	1	1	0	0	0	0	3	1	3	1	0	0	2	0	0	0	k__Bacteria; p__Tenericutes; c__Mollicutes; o__Mollicutes RF39; f__uncultured rumen bacterium; g__uncultured rumen bacterium; s__uncultured rumen bacterium
OTU_701	0	2	5	2	19	9	2	1	2	3	14	2	2	2	9	9	2	14	k__Bacteria; p__Firmicutes; c__Clostridia; o__Clostridiales; f__Lachnospiraceae; g__Lachnospiraceae UCG-008; s__uncultured rumen bacterium
OTU_9391	1	0	0	0	0	0	0	0	0	0	0	0	0	0	0	0	0	0	k__Bacteria; p__Tenericutes; c__Mollicutes; o__Mollicutes RF39
OTU_9859	1	0	0	0	0	0	0	0	1	0	0	1	1	0	0	0	0	0	k__Bacteria; p__Tenericutes; c__Mollicutes; o__Mollicutes RF39
OTU_1555	2	1	1	1	0	1	2	2	2	0	0	1	5	1	1	2	1	1	k__Bacteria; p__Bacteroidetes; c__Bacteroidia; o__Bacteroidales; f__Muribaculaceae
OTU_2062	0	0	0	1	1	0	0	1	1	1	0	0	0	0	0	0	0	0	k__Bacteria; p__Spirochaetes; c__Spirochaetia; o__Spirochaetales; f__Spirochaetaceae; g__Treponema 2; s__uncultured rumen bacterium
OTU_2306	3	0	0	0	0	1	0	0	0	0	0	0	2	1	0	0	0	1	k__Bacteria; p__Firmicutes; c__Clostridia; o__Clostridiales; f__Lachnospiraceae; g__Acetitomaculum; s__uncultured rumen bacterium
OTU_2709	1	0	0	0	2	0	0	0	0	0	0	0	0	0	0	0	3	0	k__Bacteria; p__Firmicutes; c__Clostridia; o__Clostridiales; f__Ruminococcaceae
OTU_1606	1	5	1	2	2	0	1	2	0	3	1	6	1	6	0	1	2	1	k__Bacteria; p__Firmicutes; c__Clostridia; o__Clostridiales; f__Family XIII; g__[Eubacterium] nodatum group
OTU_8432	1	0	0	0	0	0	0	0	0	0	0	0	0	0	0	0	0	0	k__Bacteria; p__Tenericutes; c__Mollicutes; o__Mollicutes RF39
OTU_3127	0	1	1	0	1	2	1	1	1	1	0	0	0	1	1	1	0	1	k__Bacteria; p__Bacteroidetes; c__Bacteroidia; o__Bacteroidales
OTU_1616	2	1	0	0	0	1	0	0	1	0	0	0	0	0	3	2	0	2	k__Bacteria; p__Bacteroidetes; c__Bacteroidia; o__Bacteroidales; f__Rikenellaceae; g__Rikenellaceae RC9 gut group; s__uncultured rumen bacterium
OTU_658	3	0	2	0	12	11	5	1	8	1	5	2	16	3	2	2	7	11	k__Bacteria; p__Firmicutes; c__Clostridia; o__Clostridiales; f__Ruminococcaceae; g__[Eubacterium] coprostanoligenes group
OTU_1877	0	0	0	0	0	0	0	0	0	0	0	0	0	0	0	0	0	0	k__Bacteria; p__Proteobacteria; c__Alphaproteobacteria; o__Rhodospirillales; f__uncultured
OTU_2343	1	0	0	1	0	0	0	0	0	0	0	0	0	0	2	3	0	0	k__Bacteria; p__Firmicutes; c__Clostridia; o__Clostridiales; f__Family XIII; g__Family XIII UCG-001; s__uncultured rumen bacterium
OTU_732	2	0	1	3	2	2	2	0	2	1	2	3	2	0	0	0	0	0	k__Bacteria; p__Firmicutes; c__Clostridia; o__Clostridiales; f__Ruminococcaceae; g__[Eubacterium] coprostanoligenes group
OTU_1634	1	1	0	0	3	2	1	0	2	0	0	1	1	1	0	4	0	0	k__Bacteria; p__Bacteroidetes; c__Bacteroidia; o__Bacteroidales; f__Muribaculaceae; g__uncultured bacterium; s__uncultured bacterium
OTU_10316	3	6	0	3	1	0	0	0	2	2	6	3	1	0	1	0	0	1	k__Bacteria; p__Tenericutes; c__Mollicutes; o__Mollicutes RF39
OTU_3056	1	0	0	0	0	0	0	0	0	2	0	0	0	1	1	2	0	0	k__Bacteria; p__Firmicutes; c__Clostridia; o__Clostridiales; f__Lachnospiraceae
OTU_8166	0	5	0	1	0	0	3	1	0	4	1	3	0	1	1	1	0	1	k__Bacteria; p__Firmicutes; c__Clostridia; o__Clostridiales; f__Family XIII; g__[Eubacterium] nodatum group; s__uncultured rumen bacterium
OTU_1765	1	0	0	0	0	0	0	0	0	0	0	0	0	0	1	0	0	0	k__Bacteria; p__Firmicutes; c__Clostridia; o__Clostridiales; f__Christensenellaceae; g__Christensenellaceae R-7 group
OTU_1106	0	0	4	4	4	0	1	3	3	1	3	2	7	1	5	4	2	1	k__Bacteria; p__Firmicutes; c__Clostridia; o__Clostridiales; f__Christensenellaceae; g__Christensenellaceae R-7 group
OTU_1558	0	2	0	0	0	0	1	0	0	0	0	0	0	0	0	4	0	0	k__Bacteria; p__Proteobacteria; c__Gammaproteobacteria; o__Betaproteobacteriales; f__Rhodocyclaceae
OTU_3297	0	0	0	1	0	3	1	0	2	4	2	3	0	9	1	2	3	2	k__Bacteria; p__Bacteroidetes; c__Bacteroidia; o__Bacteroidales; f__Prevotellaceae; g__Prevotella 1; s__uncultured bacterium
OTU_2167	1	0	0	0	0	1	0	0	0	0	0	0	0	0	0	0	0	0	k__Bacteria; p__Firmicutes; c__Clostridia; o__Clostridiales; f__Ruminococcaceae
OTU_3350	1	2	3	1	1	0	1	2	0	2	0	0	0	2	0	0	1	0	k__Bacteria; p__Firmicutes; c__Clostridia; o__Clostridiales; f__Lachnospiraceae
OTU_1074	0	0	0	5	4	1	0	0	1	0	2	0	1	0	0	1	0	1	k__Bacteria; p__Firmicutes; c__Bacilli; o__Lactobacillales; f__Enterococcaceae; g__Enterococcus; s__Enterococcus faecium
OTU_2363	0	1	2	3	0	3	0	0	5	0	2	1	4	0	4	3	2	4	k__Bacteria; p__Firmicutes; c__Clostridia; o__Clostridiales; f__Lachnospiraceae; g__Lachnospiraceae NK3A20 group
OTU_1335	2	0	1	1	0	0	1	0	1	0	0	0	2	0	1	2	2	0	k__Bacteria; p__Proteobacteria; c__Gammaproteobacteria; o__Betaproteobacteriales; f__Burkholderiaceae; g__Comamonas; s__uncultured rumen bacterium
OTU_3338	2	0	0	0	0	2	0	2	0	0	1	0	0	1	0	0	1	0	k__Bacteria; p__Bacteroidetes; c__Bacteroidia; o__Bacteroidales; f__Prevotellaceae
OTU_997	0	7	16	11	8	5	1	2	6	2	14	4	8	1	24	7	8	0	k__Bacteria; p__Bacteroidetes; c__Bacteroidia; o__Bacteroidales; f__Prevotellaceae; g__Prevotellaceae NK3B31 group; s__uncultured rumen bacterium
OTU_2269	2	0	2	2	0	0	1	4	3	0	2	1	0	1	0	1	0	1	k__Bacteria; p__Firmicutes; c__Clostridia; o__Clostridiales; f__Family XIII; g__Family XIII AD3011 group; s__bacterium YSD2010
OTU_298	1	4	6	16	5	6	16	9	6	5	5	5	9	6	7	10	14	10	k__Bacteria; p__Firmicutes; c__Erysipelotrichia; o__Erysipelotrichales; f__Erysipelotrichaceae; g__Erysipelotrichaceae UCG-004; s__uncultured bacterium
OTU_3692	1	0	1	0	0	0	0	0	0	0	2	0	2	0	0	0	0	0	k__Bacteria; p__Firmicutes; c__Clostridia; o__Clostridiales; f__Ruminococcaceae; g__Ruminococcaceae UCG-013; s__uncultured bacterium
OTU_9978	1	0	0	1	0	0	0	1	0	0	0	0	0	0	0	0	0	0	k__Bacteria; p__Firmicutes; c__Clostridia; o__Clostridiales; f__Lachnospiraceae
OTU_735	1	6	12	6	4	10	7	2	8	7	9	1	5	2	2	5	4	1	k__Bacteria; p__Firmicutes; c__Clostridia; o__Clostridiales; f__Lachnospiraceae; g__Lachnospiraceae FCS020 group
OTU_9755	1	0	0	0	0	0	0	0	0	0	0	0	0	0	0	0	0	0	k__Bacteria; p__Firmicutes; c__Clostridia; o__Clostridiales; f__Ruminococcaceae; g__Ruminococcaceae UCG-014
OTU_10798	1	1	0	0	0	0	0	0	0	0	1	0	0	1	0	0	0	0	k__Bacteria; p__Firmicutes; c__Clostridia; o__Clostridiales; f__Ruminococcaceae; g__Ruminococcaceae UCG-014
OTU_9537	0	0	0	1	0	0	1	0	1	3	0	2	0	0	0	0	0	0	k__Bacteria; p__Firmicutes; c__Clostridia; o__Clostridiales
OTU_755	2	0	0	3	13	5	0	1	15	1	8	2	6	2	0	2	6	3	k__Bacteria; p__Firmicutes; c__Clostridia; o__Clostridiales; f__Lachnospiraceae; g__Acetitomaculum
OTU_2574	0	0	0	0	0	0	0	0	0	0	0	0	0	0	0	0	0	0	k__Bacteria; p__Firmicutes; c__Clostridia; o__Clostridiales; f__Ruminococcaceae
OTU_8234	1	1	1	0	1	0	0	0	0	2	3	0	2	2	0	1	0	0	k__Bacteria; p__Firmicutes; c__Clostridia; o__Clostridiales; f__Ruminococcaceae; g__Ruminococcaceae UCG-014; s__uncultured bacterium
OTU_5038	1	0	0	0	0	0	0	1	0	0	0	0	1	0	0	1	0	0	k__Bacteria; p__Firmicutes; c__Clostridia; o__Clostridiales; f__Lachnospiraceae; g__Lachnospiraceae NK4A136 group; s__uncultured bacterium
OTU_1384	0	0	0	0	3	1	1	0	1	0	2	0	0	0	1	1	0	0	k__Bacteria; p__Firmicutes; c__Clostridia; o__Clostridiales; f__Lachnospiraceae; g__Lachnospiraceae UCG-006; s__uncultured rumen bacterium
OTU_1178	2	0	1	2	3	4	1	2	0	0	4	0	1	0	0	0	0	0	k__Bacteria; p__Firmicutes; c__Erysipelotrichia; o__Erysipelotrichales; f__Erysipelotrichaceae; g__[Anaerorhabdus] furcosa group; s__uncultured bacterium
OTU_3057	0	0	1	1	0	2	1	0	0	2	3	1	0	0	0	0	0	0	k__Bacteria; p__Firmicutes; c__Clostridia; o__Clostridiales; f__Ruminococcaceae; g__Ruminococcaceae UCG-014; s__uncultured bacterium
OTU_1532	1	0	0	1	3	2	1	1	2	0	2	0	1	2	0	1	0	2	k__Bacteria; p__Firmicutes; c__Clostridia; o__Clostridiales; f__Lachnospiraceae
OTU_2346	1	0	1	1	2	0	0	2	0	3	1	1	0	1	0	2	0	0	k__Bacteria; p__Firmicutes; c__Clostridia; o__Clostridiales; f__Lachnospiraceae; g__[Ruminococcus] torques group; s__uncultured organism
OTU_1213	1	1	0	0	0	2	0	0	5	5	1	0	2	0	1	9	0	0	k__Bacteria; p__Firmicutes; c__Clostridia
OTU_9655	4	1	0	0	1	0	0	0	0	0	0	0	0	0	0	0	0	0	k__Bacteria; p__Firmicutes; c__Clostridia; o__Clostridiales
OTU_1951	3	5	6	2	2	5	7	11	13	2	9	17	9	18	8	15	25	9	k__Bacteria; p__Firmicutes; c__Clostridia; o__Clostridiales
OTU_2421	0	4	11	12	18	14	21	7	19	2	25	11	13	37	18	14	55	31	k__Bacteria; p__Firmicutes; c__Clostridia; o__Clostridiales; f__Ruminococcaceae; g__Ruminococcaceae UCG-014
OTU_291	2	2	4	11	13	12	14	8	3	8	9	13	18	16	8	5	10	13	k__Bacteria; p__Firmicutes; c__Clostridia; o__Clostridiales; f__Ruminococcaceae
OTU_3437	1	3	0	0	0	0	0	1	0	4	0	2	0	2	0	0	1	0	k__Bacteria; p__Firmicutes; c__Clostridia; o__Clostridiales; f__Ruminococcaceae
OTU_8911	1	2	0	6	0	2	1	4	0	1	0	0	0	1	0	1	0	0	k__Bacteria; p__Firmicutes; c__Clostridia; o__Clostridiales; f__Lachnospiraceae
OTU_3503	0	1	0	3	0	0	1	1	1	0	3	0	1	3	0	0	0	2	k__Bacteria; p__Firmicutes; c__Clostridia; o__Clostridiales; f__Lachnospiraceae; g__Lachnospiraceae NK3A20 group
OTU_1631	0	0	1	1	0	2	2	2	3	0	2	0	0	0	4	0	1	0	k__Bacteria; p__Bacteroidetes; c__Bacteroidia; o__Bacteroidales; f__F082
OTU_1020	3	1	9	2	2	3	3	1	0	0	5	0	3	5	2	3	8	2	k__Bacteria; p__Bacteroidetes; c__Bacteroidia; o__Bacteroidales; f__Prevotellaceae
OTU_6060	1	0	1	0	0	0	0	0	1	1	1	0	0	0	2	0	0	0	k__Bacteria; p__Firmicutes; c__Clostridia; o__Clostridiales; f__Lachnospiraceae; g__Lachnospiraceae NK4A136 group
OTU_7756	0	0	0	0	0	0	0	0	0	0	0	0	0	0	0	0	0	0	k__Bacteria; p__Firmicutes; c__Clostridia; o__Clostridiales
OTU_4250	0	0	0	0	0	0	0	0	0	0	0	0	0	0	0	1	2	0	k__Bacteria; p__Firmicutes; c__Clostridia; o__Clostridiales; f__Lachnospiraceae
OTU_2464	0	3	12	2	10	4	1	5	2	3	10	4	6	11	8	20	11	0	k__Bacteria; p__Firmicutes; c__Clostridia; o__Clostridiales; f__Ruminococcaceae; g__Ruminococcaceae UCG-014
OTU_8322	0	1	0	0	0	1	0	1	1	0	0	0	0	0	0	0	0	1	k__Bacteria; p__Tenericutes; c__Mollicutes; o__Mollicutes RF39; f__uncultured rumen bacterium; g__uncultured rumen bacterium; s__uncultured rumen bacterium
OTU_1286	1	1	0	1	2	3	1	1	0	2	2	2	2	0	3	0	1	0	k__Bacteria; p__Firmicutes; c__Clostridia; o__Clostridiales; f__Ruminococcaceae; g__Hydrogenoanaerobacterium; s__uncultured bacterium
OTU_1914	0	0	0	0	0	0	0	1	0	0	1	2	1	1	0	1	3	4	k__Bacteria; p__Firmicutes; c__Clostridia; o__Clostridiales; f__Lachnospiraceae; g__Oribacterium; s__uncultured bacterium
OTU_11015	0	0	0	0	0	0	0	0	0	0	0	0	0	2	0	0	1	0	k__Bacteria; p__Firmicutes; c__Clostridia; o__Clostridiales; f__Lachnospiraceae
OTU_2341	1	0	0	0	4	0	0	0	0	0	0	0	0	3	0	0	0	0	k__Bacteria; p__Firmicutes; c__Clostridia; o__Clostridiales; f__Ruminococcaceae; g__uncultured; s__uncultured rumen bacterium
OTU_456	1	6	9	3	4	12	7	5	8	2	8	3	6	34	13	6	24	13	k__Bacteria; p__Bacteroidetes; c__Bacteroidia; o__Bacteroidales; f__Rikenellaceae; g__Rikenellaceae RC9 gut group; s__uncultured rumen bacterium
OTU_1227	0	1	1	2	1	0	2	1	0	1	1	0	1	0	2	0	1	1	k__Bacteria; p__Patescibacteria; c__Saccharimonadia; o__Saccharimonadales; f__Saccharimonadaceae; g__Candidatus Saccharimonas
OTU_9753	1	0	0	0	0	0	0	0	0	0	0	0	0	0	0	0	0	0	k__Bacteria; p__Firmicutes; c__Clostridia; o__Clostridiales; f__Ruminococcaceae
OTU_1449	2	1	0	1	0	0	0	1	1	1	1	1	3	0	0	0	0	0	k__Bacteria; p__Firmicutes; c__Clostridia; o__Clostridiales; f__Ruminococcaceae; g__Ruminococcaceae UCG-009; s__uncultured bacterium
OTU_1840	0	1	2	0	3	1	1	1	0	0	1	0	0	2	1	0	2	0	k__Bacteria; p__Firmicutes; c__Clostridia; o__Clostridiales; f__Ruminococcaceae
OTU_1080	2	4	2	5	1	1	0	3	1	2	5	12	3	0	0	3	2	1	k__Bacteria; p__Cyanobacteria; c__Melainabacteria; o__Gastranaerophilales; f__uncultured rumen bacterium; g__uncultured rumen bacterium; s__uncultured rumen bacterium
OTU_1633	0	0	1	0	0	2	2	0	0	1	0	1	0	0	0	2	0	0	k__Bacteria; p__Firmicutes; c__Clostridia; o__Clostridiales; f__Lachnospiraceae
OTU_6575	1	2	2	8	0	6	1	2	0	6	4	3	4	9	4	0	0	0	k__Bacteria; p__Firmicutes; c__Clostridia; o__Clostridiales; f__Ruminococcaceae; g__Ruminococcus 1
OTU_1215	0	0	3	1	2	0	0	1	5	1	1	0	1	3	0	4	0	0	k__Bacteria; p__Firmicutes; c__Clostridia; o__Clostridiales; f__Lachnospiraceae; g__Syntrophococcus
OTU_483	1	2	2	6	0	5	2	16	11	2	7	11	33	4	0	0	1	0	k__Bacteria; p__Firmicutes; c__Clostridia; o__Clostridiales; f__Ruminococcaceae; g__Ruminococcus 1
OTU_2377	1	1	5	1	0	1	1	0	0	1	0	0	1	3	0	0	0	0	k__Bacteria; p__Firmicutes; c__Clostridia; o__Clostridiales; f__Ruminococcaceae; g__uncultured; s__uncultured rumen bacterium
OTU_1581	0	0	0	0	0	0	0	0	0	0	0	0	0	0	0	0	0	0	k__Bacteria; p__Firmicutes; c__Clostridia; o__Clostridiales; f__Ruminococcaceae; g__[Eubacterium] coprostanoligenes group; s__uncultured bacterium
OTU_11160	1	15	1	16	5	4	2	2	15	2	5	7	3	2	6	0	2	8	k__Bacteria; p__Firmicutes; c__Clostridia; o__Clostridiales; f__Christensenellaceae; g__Christensenellaceae R-7 group; s__uncultured rumen bacterium
OTU_7009	0	0	0	0	0	2	0	0	0	0	0	0	0	0	0	1	0	0	k__Bacteria; p__Bacteroidetes; c__Bacteroidia; o__Bacteroidales
OTU_6462	1	1	2	1	3	2	0	2	0	4	2	2	0	16	3	2	5	13	k__Bacteria; p__Firmicutes; c__Clostridia; o__Clostridiales
OTU_1663	0	1	0	0	0	0	11	0	1	5	1	0	0	0	1	5	0	0	k__Bacteria; p__Firmicutes; c__Clostridia; o__Clostridiales; f__Lachnospiraceae
OTU_2200	3	0	0	0	0	0	0	0	0	0	0	0	0	0	0	0	0	0	k__Bacteria; p__Firmicutes; c__Clostridia; o__Clostridiales; f__Lachnospiraceae
OTU_9660	1	0	0	0	0	0	0	0	0	0	0	0	0	0	0	0	0	0	k__Bacteria; p__Firmicutes; c__Clostridia; o__Clostridiales
OTU_1659	1	0	0	0	0	0	0	3	0	0	0	3	0	0	2	1	1	0	k__Bacteria; p__Bacteroidetes; c__Bacteroidia; o__Bacteroidales; f__Bacteroidaceae; g__Bacteroides
OTU_1662	1	0	1	1	0	1	1	0	1	1	1	0	2	0	0	1	1	1	k__Bacteria; p__Proteobacteria; c__Deltaproteobacteria; o__Desulfovibrionales; f__Desulfovibrionaceae; g__Desulfovibrio
OTU_1035	0	6	6	4	0	1	3	3	4	5	6	2	2	0	3	0	2	4	k__Bacteria; p__Firmicutes; c__Clostridia; o__Clostridiales; f__Lachnospiraceae; g__Lachnoclostridium
OTU_5085	0	0	1	0	3	0	1	1	2	0	1	0	2	0	0	1	0	1	k__Bacteria; p__Firmicutes; c__Clostridia; o__Clostridiales; f__Ruminococcaceae; g__Ruminiclostridium 9; s__uncultured rumen bacterium
OTU_6640	1	0	0	0	1	1	0	0	0	1	0	0	0	0	0	0	0	0	k__Bacteria; p__Firmicutes; c__Clostridia; o__Clostridiales; f__Ruminococcaceae; g__Ruminococcaceae UCG-014
OTU_1707	1	2	0	0	3	0	0	1	2	1	0	2	0	1	1	2	2	1	k__Bacteria; p__Synergistetes; c__Synergistia; o__Synergistales; f__Synergistaceae; g__Fretibacterium; s__uncultured rumen bacterium
OTU_11180	0	0	0	0	0	0	0	0	0	0	0	0	0	0	0	0	0	0	k__Bacteria; p__Bacteroidetes; c__Bacteroidia; o__Bacteroidales; f__Prevotellaceae; g__Alloprevotella; s__uncultured rumen bacterium
OTU_3453	1	0	0	0	0	2	0	1	1	0	3	0	0	1	0	0	0	0	k__Bacteria; p__Bacteroidetes; c__Bacteroidia; o__Bacteroidales; f__Muribaculaceae; g__uncultured rumen bacterium; s__uncultured rumen bacterium
OTU_650	0	0	0	1	0	0	0	0	0	0	0	0	1	0	0	0	0	0	k__Bacteria; p__Firmicutes; c__Clostridia; o__Clostridiales; f__Ruminococcaceae; g__Ruminococcaceae NK4A214 group; s__uncultured bacterium
OTU_11001	1	0	0	1	0	0	0	0	0	2	0	0	0	0	0	0	0	0	k__Bacteria; p__Firmicutes; c__Clostridia; o__Clostridiales; f__Lachnospiraceae
OTU_4034	2	0	0	0	0	0	0	0	1	0	0	0	0	0	3	0	0	0	k__Bacteria; p__Firmicutes; c__Clostridia; o__Clostridiales; f__Ruminococcaceae; g__Ruminococcaceae UCG-013
OTU_10238	1	0	2	0	0	0	0	0	0	1	1	0	0	0	0	1	0	0	k__Bacteria; p__Firmicutes; c__Clostridia; o__Clostridiales; f__Lachnospiraceae
OTU_675	1	5	1	7	0	11	1	4	1	1	2	0	3	5	1	1	2	6	k__Bacteria; p__Bacteroidetes; c__Bacteroidia; o__Bacteroidales; f__F082
OTU_4981	1	0	0	0	0	0	0	0	0	0	0	1	0	0	0	0	0	0	k__Bacteria; p__Firmicutes; c__Clostridia; o__Clostridiales
OTU_3525	1	0	0	0	0	0	0	0	0	0	0	0	1	0	0	0	0	0	k__Bacteria; p__Firmicutes; c__Clostridia; o__Clostridiales; f__Clostridiaceae 1; g__Candidatus Arthromitus; s__uncultured bacterium
OTU_2505	0	0	0	0	0	0	0	0	0	0	1	0	0	0	0	0	0	0	k__Bacteria; p__Proteobacteria; c__Alphaproteobacteria; o__Rickettsiales; f__Mitochondria; g__uncultured rumen bacterium; s__uncultured rumen bacterium
OTU_2964	0	0	0	0	1	0	0	0	0	0	0	0	0	0	0	0	0	0	k__Bacteria; p__Bacteroidetes; c__Bacteroidia; o__Bacteroidales; f__Prevotellaceae; g__Prevotella 1; s__uncultured bacterium
OTU_6062	1	0	1	0	0	0	0	0	0	0	0	0	0	1	0	0	1	0	k__Bacteria; p__Firmicutes; c__Clostridia; o__Clostridiales; f__Lachnospiraceae
OTU_2498	0	0	0	0	1	0	0	0	1	0	0	0	2	1	6	3	3	1	k__Bacteria; p__Bacteroidetes; c__Bacteroidia; o__Bacteroidales; f__F082
OTU_1915	1	0	0	1	1	0	0	0	0	1	0	0	0	0	0	0	0	0	k__Bacteria; p__Actinobacteria; c__Coriobacteriia; o__Coriobacteriales; f__Eggerthellaceae; g__Denitrobacterium; s__Denitrobacterium detoxificans
OTU_3326	1	0	0	0	0	4	0	0	0	0	1	0	0	2	0	1	0	1	k__Bacteria; p__Firmicutes; c__Clostridia; o__Clostridiales; f__Lachnospiraceae; g__Lachnospiraceae NK4A136 group; s__uncultured bacterium
OTU_458	1	0	0	3	0	0	0	0	0	0	0	0	2	0	0	1	2	0	k__Bacteria; p__Firmicutes; c__Clostridia; o__Clostridiales; f__Ruminococcaceae; g__Ruminiclostridium 5; s__uncultured bacterium
OTU_343	3	0	21	14	43	10	2	7	9	2	6	0	11	9	26	24	50	68	k__Bacteria; p__Bacteroidetes; c__Bacteroidia; o__Bacteroidales; f__F082; g__uncultured rumen bacterium; s__uncultured rumen bacterium
OTU_1932	1	0	2	1	0	0	0	0	0	0	0	0	0	0	0	0	0	1	k__Bacteria; p__Bacteroidetes; c__Bacteroidia; o__Bacteroidales; f__Bacteroidaceae; g__Bacteroides
OTU_3757	1	0	0	0	0	0	0	0	0	2	0	0	1	0	0	0	0	0	k__Bacteria; p__Firmicutes; c__Erysipelotrichia; o__Erysipelotrichales; f__Erysipelotrichaceae; g__Erysipelotrichaceae UCG-007
OTU_3676	1	1	0	0	0	0	0	0	0	0	0	3	2	0	0	0	0	0	k__Bacteria; p__Firmicutes; c__Clostridia; o__Clostridiales
OTU_294	1	6	0	6	0	4	49	5	15	6	6	5	13	8	4	6	0	0	k__Bacteria; p__Patescibacteria; c__Saccharimonadia; o__Saccharimonadales; f__uncultured bacterium; g__uncultured bacterium; s__uncultured bacterium
OTU_2211	1	1	0	0	0	0	0	1	0	0	0	0	1	0	0	0	0	1	k__Bacteria; p__Firmicutes; c__Clostridia; o__Clostridiales; f__Lachnospiraceae; g__Lachnospiraceae UCG-002; s__uncultured rumen bacterium
OTU_779	0	1	7	4	8	2	2	3	0	3	5	0	3	2	4	5	3	6	k__Bacteria; p__Bacteroidetes; c__Bacteroidia; o__Bacteroidales; f__Prevotellaceae; g__Prevotella 1; s__uncultured bacterium
OTU_7787	1	5	3	3	6	3	2	1	0	10	8	3	2	9	0	1	0	1	k__Bacteria; p__Firmicutes; c__Clostridia; o__Clostridiales; f__Lachnospiraceae; g__Lachnospiraceae NK4A136 group; s__uncultured rumen bacterium
OTU_1149	1	2	0	0	0	2	0	1	0	1	1	0	1	0	1	0	1	0	k__Bacteria; p__Patescibacteria; c__Gracilibacteria; o__Absconditabacteriales (SR1); f__uncultured bacterium; g__uncultured bacterium; s__uncultured bacterium
OTU_2041	1	0	3	1	1	0	2	1	12	1	0	0	1	2	1	3	7	10	k__Bacteria; p__Firmicutes; c__Clostridia; o__Clostridiales; f__Lachnospiraceae
OTU_2044	1	0	1	3	2	10	1	0	0	3	0	0	2	4	1	1	0	0	k__Bacteria; p__Firmicutes; c__Clostridia; o__Clostridiales; f__Lachnospiraceae; g__[Eubacterium] ruminantium group
OTU_753	0	2	10	0	2	5	31	10	7	0	6	10	2	3	8	3	0	0	k__Bacteria; p__Bacteroidetes; c__Bacteroidia; o__Bacteroidales; f__Prevotellaceae
OTU_9690	1	0	0	0	0	0	0	0	0	0	0	0	0	0	0	1	0	0	k__Bacteria; p__Bacteroidetes; c__Bacteroidia; o__Bacteroidales; f__Prevotellaceae; g__Alloprevotella; s__uncultured rumen bacterium
OTU_7736	1	0	0	1	1	0	0	0	1	0	0	0	1	1	1	0	2	2	k__Bacteria; p__Firmicutes; c__Clostridia; o__Clostridiales; f__Christensenellaceae; g__Christensenellaceae R-7 group
OTU_6583	0	0	0	0	1	0	0	1	0	1	0	0	1	2	4	0	5	3	k__Bacteria; p__Firmicutes; c__Clostridia; o__Clostridiales; f__Ruminococcaceae; g__Ruminococcaceae NK4A214 group; s__uncultured bacterium
OTU_1479	1	0	0	0	2	1	0	2	0	0	3	0	1	0	0	0	0	0	k__Bacteria; p__Bacteroidetes; c__Bacteroidia; o__Bacteroidales; f__Prevotellaceae; g__Prevotellaceae UCG-003; s__uncultured rumen bacterium
OTU_3744	1	0	0	0	0	0	0	0	0	0	1	0	0	0	0	0	0	0	k__Bacteria; p__Tenericutes; c__Mollicutes; o__Mollicutes RF39; f__uncultured bacterium; g__uncultured bacterium; s__uncultured bacterium
OTU_8957	2	0	0	0	0	0	3	0	0	0	0	0	0	0	1	0	1	0	k__Bacteria; p__Bacteroidetes; c__Bacteroidia; o__Bacteroidales; f__Prevotellaceae; g__Prevotella 1; s__uncultured rumen bacterium
OTU_1203	2	1	1	1	0	1	0	2	9	3	1	1	2	0	0	2	1	3	k__Bacteria; p__Firmicutes; c__Clostridia; o__Clostridiales; f__Family XIII
OTU_3810	3	0	0	0	0	0	0	0	1	0	0	0	0	0	0	0	0	0	k__Bacteria; p__Tenericutes; c__Mollicutes; o__Mollicutes RF39
OTU_1072	4	3	0	0	0	0	0	0	1	0	0	2	6	0	0	0	2	4	k__Bacteria; p__Firmicutes; c__Clostridia; o__Clostridiales; f__Ruminococcaceae; g__Ruminococcus 2
OTU_1921	0	0	2	0	0	1	0	0	0	2	0	2	1	1	1	0	0	1	k__Bacteria; p__Firmicutes; c__Clostridia; o__Clostridiales; f__Lachnospiraceae
OTU_10911	1	0	0	0	0	0	0	0	0	0	0	0	0	0	0	0	0	0	k__Bacteria; p__Firmicutes; c__Clostridia; o__Clostridiales
OTU_5858	2	0	0	2	1	1	0	0	1	2	0	0	1	4	0	0	7	5	k__Bacteria; p__Firmicutes; c__Clostridia; o__Clostridiales; f__Ruminococcaceae; g__Ruminococcaceae NK4A214 group
OTU_6209	1	0	3	1	0	1	0	1	0	2	1	1	0	4	0	0	1	0	k__Bacteria; p__Firmicutes; c__Clostridia; o__Clostridiales; f__Lachnospiraceae; g__Pseudobutyrivibrio
OTU_8198	1	0	0	0	0	0	0	0	0	0	0	0	0	0	0	0	0	0	k__Bacteria; p__Firmicutes; c__Clostridia; o__Clostridiales; f__Lachnospiraceae; g__Butyrivibrio 2
OTU_8036	0	0	0	0	0	0	0	0	0	0	0	0	0	0	0	0	0	0	k__Bacteria; p__Firmicutes; c__Clostridia; o__Clostridiales; f__Ruminococcaceae
OTU_851	2	0	2	4	2	2	0	1	5	1	1	2	3	1	3	0	1	4	k__Bacteria; p__Spirochaetes; c__Spirochaetia; o__Spirochaetales; f__Spirochaetaceae; g__Treponema 2
OTU_2388	0	1	0	0	1	1	0	0	0	0	1	0	0	0	0	0	0	0	k__Bacteria; p__Bacteroidetes; c__Bacteroidia; o__Bacteroidales; f__Prevotellaceae
OTU_998	1	0	0	0	0	0	0	0	0	0	1	0	1	0	0	0	0	0	k__Bacteria; p__Firmicutes; c__Clostridia; o__Clostridiales; f__Ruminococcaceae; g__uncultured
OTU_2955	1	7	8	25	16	13	3	4	21	0	14	10	18	24	10	9	14	19	k__Bacteria; p__Firmicutes; c__Clostridia; o__Clostridiales; f__Christensenellaceae; g__Christensenellaceae R-7 group
OTU_7055	1	5	1	1	0	0	0	0	0	0	0	0	1	0	2	0	0	2	k__Bacteria; p__Tenericutes; c__Mollicutes; o__Mollicutes RF39; f__uncultured bacterium; g__uncultured bacterium; s__uncultured bacterium
OTU_5579	1	1	0	0	0	0	0	0	4	0	0	0	0	3	0	0	0	0	k__Bacteria; p__Firmicutes; c__Clostridia; o__Clostridiales
OTU_6586	1	1	3	0	0	2	2	0	0	0	1	0	0	6	1	0	0	0	k__Bacteria; p__Bacteroidetes; c__Bacteroidia; o__Bacteroidales; f__Prevotellaceae; g__Prevotella 1; s__uncultured bacterium
OTU_1986	1	1	0	0	0	0	0	0	0	0	2	0	1	0	2	0	1	0	k__Bacteria; p__Firmicutes; c__Clostridia; o__Clostridiales; f__Ruminococcaceae; g__Butyricicoccus; s__uncultured bacterium
OTU_1411	1	2	2	3	0	3	0	0	2	3	0	0	1	0	2	1	2	3	k__Bacteria; p__Bacteroidetes; c__Bacteroidia; o__Bacteroidales; f__Prevotellaceae; g__Prevotella 1
OTU_9240	1	0	2	0	3	0	0	0	1	0	0	0	0	0	0	0	2	0	k__Bacteria; p__Firmicutes; c__Clostridia; o__Clostridiales; f__Ruminococcaceae; g__Ruminococcaceae NK4A214 group
OTU_6252	2	1	0	0	0	0	0	0	1	1	0	2	1	0	0	1	0	2	k__Bacteria; p__Firmicutes; c__Clostridia; o__Clostridiales; f__Lachnospiraceae; g__Roseburia
OTU_1694	0	2	1	0	0	3	2	0	0	0	1	4	1	1	0	0	1	3	k__Bacteria; p__Firmicutes; c__Clostridia; o__Clostridiales; f__Family XIII; g__Family XIII AD3011 group; s__uncultured bacterium
OTU_5717	1	0	0	0	0	0	0	0	0	0	0	0	0	0	0	0	0	0	k__Bacteria; p__Firmicutes; c__Clostridia; o__Clostridiales
OTU_1071	0	1	0	2	0	0	0	0	0	0	0	1	0	0	0	1	0	0	k__Bacteria; p__Tenericutes; c__Mollicutes; o__Mollicutes RF39; f__uncultured bacterium; g__uncultured bacterium; s__uncultured bacterium
OTU_87	0	0	0	0	0	2	4	0	2	1	0	1	1	0	0	0	0	0	k__Bacteria; p__Firmicutes; c__Clostridia; o__Clostridiales; f__Ruminococcaceae; g__[Eubacterium] coprostanoligenes group; s__uncultured bacterium
OTU_6298	0	0	8	1	6	7	3	0	2	1	5	1	1	4	4	6	7	0	k__Bacteria; p__Firmicutes
OTU_780	1	3	7	6	16	7	0	5	4	1	8	0	14	1	8	4	5	1	k__Bacteria; p__Bacteroidetes; c__Bacteroidia; o__Bacteroidales; f__Prevotellaceae; g__Prevotellaceae NK3B31 group; s__uncultured rumen bacterium
OTU_1123	0	1	0	1	0	7	0	0	0	0	0	0	4	0	0	0	0	0	k__Bacteria; p__Firmicutes; c__Clostridia; o__Clostridiales; f__Ruminococcaceae; g__Ruminococcus 1
OTU_1640	1	0	0	0	0	4	1	1	0	0	0	0	0	1	0	1	3	2	k__Bacteria; p__Firmicutes; c__Erysipelotrichia; o__Erysipelotrichales; f__Erysipelotrichaceae; g__Erysipelotrichaceae UCG-004
OTU_2080	1	4	1	3	0	0	0	0	0	2	1	0	2	1	5	2	0	1	k__Bacteria; p__Firmicutes; c__Clostridia; o__Clostridiales; f__Lachnospiraceae; g__Agathobacter; s__uncultured bacterium
OTU_2497	0	0	1	2	8	0	0	0	0	0	0	0	1	0	0	0	0	0	k__Bacteria; p__Firmicutes; c__Negativicutes; o__Selenomonadales; f__Veillonellaceae; g__Anaerovibrio; s__uncultured bacterium
OTU_1465	0	4	1	3	2	0	1	0	1	0	2	5	4	0	1	1	0	0	k__Bacteria; p__Firmicutes; c__Clostridia; o__Clostridiales; f__Lachnospiraceae
OTU_11135	1	0	0	0	0	0	0	0	0	0	0	0	0	0	0	0	0	0	k__Bacteria; p__Bacteroidetes; c__Bacteroidia
OTU_3374	1	3	4	1	3	0	2	0	1	1	1	0	1	10	2	3	11	16	k__Bacteria; p__Bacteroidetes; c__Bacteroidia; o__Bacteroidales; f__F082
OTU_6541	1	0	0	0	0	0	0	0	0	0	0	0	1	0	0	0	0	0	k__Bacteria; p__Patescibacteria; c__Saccharimonadia; o__Saccharimonadales; f__Saccharimonadaceae; g__Candidatus Saccharimonas; s__TM7 phylum sp. oral clone CW040
OTU_1934	0	1	1	2	1	1	0	1	0	1	0	1	0	0	0	2	0	2	k__Bacteria; p__Firmicutes; c__Clostridia; o__Clostridiales; f__Ruminococcaceae; g__Ruminococcaceae UCG-014
OTU_9382	2	0	0	0	0	0	0	0	0	0	0	0	0	0	0	0	0	0	k__Bacteria; p__Firmicutes; c__Clostridia; o__Clostridiales; f__Lachnospiraceae
OTU_6040	0	3	0	0	2	0	6	0	1	0	1	2	1	0	3	2	0	0	k__Bacteria; p__Firmicutes; c__Clostridia; o__Clostridiales; f__Lachnospiraceae
OTU_1135	2	0	0	0	0	0	0	0	0	0	0	0	0	0	0	0	0	0	k__Bacteria; p__Bacteroidetes; c__Bacteroidia; o__Bacteroidales; f__Rikenellaceae; g__Rikenellaceae RC9 gut group; s__uncultured bacterium
OTU_9514	1	0	0	0	0	0	0	0	0	0	0	0	0	0	0	0	0	0	k__Bacteria; p__Firmicutes; c__Clostridia; o__Clostridiales; f__Lachnospiraceae; g__Syntrophococcus
OTU_6499	0	0	0	0	0	0	2	0	1	0	0	0	0	1	0	0	0	0	k__Bacteria; p__Bacteroidetes; c__Bacteroidia; o__Bacteroidales; f__Prevotellaceae
OTU_5113	0	1	0	1	3	1	4	1	3	1	3	3	0	3	1	0	2	1	k__Bacteria; p__Firmicutes; c__Clostridia; o__Clostridiales; f__Lachnospiraceae; g__[Eubacterium] ruminantium group
OTU_1521	1	0	0	2	0	1	0	0	0	0	2	1	2	2	2	0	0	0	k__Bacteria; p__Firmicutes; c__Clostridia; o__Clostridiales; f__Ruminococcaceae; g__Ruminococcaceae UCG-010
OTU_1760	0	1	0	0	0	0	0	0	3	0	0	0	0	0	2	0	0	0	k__Bacteria; p__Firmicutes; c__Clostridia; o__Clostridiales; f__Family XIII
OTU_1211	2	4	0	1	1	0	0	0	1	0	0	2	1	3	3	0	0	0	k__Bacteria; p__Tenericutes; c__Mollicutes; o__Anaeroplasmatales; f__Anaeroplasmataceae; g__Anaeroplasma; s__uncultured rumen bacterium
OTU_9749	0	0	0	0	0	0	0	0	0	0	0	0	0	0	1	0	0	0	k__Bacteria; p__Bacteroidetes; c__Bacteroidia; o__Bacteroidales; f__Prevotellaceae
OTU_1284	0	1	0	2	0	0	0	4	2	3	2	1	0	0	1	0	0	2	k__Bacteria; p__Firmicutes; c__Clostridia; o__Clostridiales; f__Lachnospiraceae; g__Anaerostipes; s__uncultured organism
OTU_2366	0	0	0	0	2	2	0	0	1	0	0	0	0	0	1	1	3	1	k__Bacteria; p__Firmicutes; c__Clostridia; o__Clostridiales; f__Lachnospiraceae; g__Lachnospiraceae FE2018 group
OTU_1188	0	5	12	7	21	9	5	2	3	1	9	2	2	1	8	3	12	3	k__Bacteria; p__Bacteroidetes; c__Bacteroidia; o__Bacteroidales; f__Prevotellaceae; g__Prevotellaceae UCG-001; s__uncultured rumen bacterium
OTU_1425	1	2	0	1	0	0	0	1	0	0	0	2	0	0	0	0	0	0	k__Bacteria; p__Firmicutes; c__Erysipelotrichia; o__Erysipelotrichales; f__Erysipelotrichaceae; g__Erysipelotrichaceae UCG-004; s__unidentified rumen bacterium RFN74
OTU_4259	1	2	0	0	0	0	0	0	0	0	0	0	3	0	0	0	0	0	k__Bacteria; p__Firmicutes; c__Clostridia; o__Clostridiales
OTU_1520	0	2	0	1	0	4	2	2	0	0	5	2	1	0	2	0	0	0	k__Bacteria; p__Firmicutes; c__Clostridia; o__Clostridiales; f__Lachnospiraceae; g__Lachnoclostridium 12; s__uncultured rumen bacterium
OTU_1876	1	0	0	2	0	2	1	0	2	1	4	3	2	3	0	0	0	0	k__Bacteria; p__Firmicutes; c__Clostridia; o__Clostridiales; f__Ruminococcaceae; g__Ruminococcaceae UCG-014; s__uncultured bacterium
OTU_9713	1	0	0	0	0	0	0	0	0	0	0	0	0	0	0	0	0	0	k__Bacteria; p__Firmicutes; c__Clostridia; o__Clostridiales; f__Lachnospiraceae; g__[Ruminococcus] gauvreauii group
OTU_2532	1	0	5	1	17	15	4	1	1	0	9	0	0	7	7	6	2	2	k__Bacteria; p__Bacteroidetes; c__Bacteroidia; o__Bacteroidales; f__Prevotellaceae; g__Prevotella 1; s__uncultured bacterium
OTU_4320	1	0	0	0	0	0	0	0	0	0	0	1	0	0	0	0	0	0	k__Bacteria; p__Firmicutes; c__Clostridia; o__Clostridiales; f__Lachnospiraceae; g__Lachnospiraceae NK3A20 group
OTU_2218	1	0	0	0	0	0	0	3	0	0	0	2	0	0	0	0	0	0	k__Bacteria; p__Bacteroidetes; c__Bacteroidia; o__Bacteroidales; f__Prevotellaceae
OTU_599	1	3	34	15	44	13	15	9	12	13	17	3	10	11	13	22	13	11	k__Bacteria; p__Bacteroidetes; c__Bacteroidia; o__Bacteroidales; f__Prevotellaceae; g__Prevotella 1; s__uncultured rumen bacterium
OTU_1310	2	0	6	2	2	0	0	1	1	0	1	0	0	0	4	1	1	0	k__Bacteria; p__Firmicutes; c__Clostridia; o__Clostridiales; f__Lachnospiraceae; g__[Eubacterium] ruminantium group; s__uncultured rumen bacterium
OTU_8793	1	0	1	2	1	1	0	1	0	0	1	0	1	0	0	0	0	0	k__Bacteria; p__Bacteroidetes; c__Bacteroidia; o__Bacteroidales; f__Prevotellaceae; g__Prevotella 1; s__uncultured bacterium
OTU_1518	1	2	0	11	1	7	4	3	0	6	0	5	0	3	0	0	1	0	k__Bacteria; p__Firmicutes; c__Clostridia; o__Clostridiales; f__Lachnospiraceae; g__[Eubacterium] xylanophilum group; s__uncultured bacterium
OTU_3147	1	1	0	0	1	1	2	0	1	0	0	0	0	0	1	0	0	1	k__Bacteria; p__Firmicutes; c__Clostridia; o__Clostridiales; f__Ruminococcaceae
OTU_10812	1	1	0	1	3	0	3	1	7	2	1	5	3	1	0	0	3	2	k__Bacteria; p__Bacteroidetes; c__Bacteroidia; o__Bacteroidales; f__Prevotellaceae; g__Prevotella 1; s__uncultured bacterium
OTU_5769	1	0	0	0	0	0	0	0	0	1	0	0	3	1	1	2	0	1	k__Bacteria; p__Firmicutes; c__Clostridia; o__Clostridiales; f__Lachnospiraceae; g__Lachnoclostridium 1; s__uncultured rumen bacterium
OTU_7771	1	0	1	0	0	0	0	0	0	0	0	0	0	0	0	0	1	0	k__Bacteria; p__Bacteroidetes; c__Bacteroidia; o__Bacteroidales; f__Prevotellaceae; g__Prevotella 1
OTU_6152	1	0	2	0	0	1	1	0	0	0	0	2	1	1	3	0	0	0	k__Bacteria; p__Bacteroidetes; c__Bacteroidia; o__Bacteroidales; f__Prevotellaceae; g__Prevotella 7; s__uncultured bacterium
OTU_2140	1	0	0	1	0	0	1	0	0	2	1	0	1	0	0	0	0	0	k__Bacteria; p__Firmicutes; c__Clostridia; o__Clostridiales; f__Lachnospiraceae; g__Butyrivibrio 2; s__uncultured rumen bacterium
OTU_1365	1	2	1	1	2	5	2	1	4	1	0	1	4	1	1	1	1	0	k__Bacteria; p__Bacteroidetes; c__Bacteroidia; o__Bacteroidales; f__Prevotellaceae; g__Prevotellaceae UCG-001; s__uncultured rumen bacterium
OTU_4182	1	0	0	0	0	0	0	0	1	0	0	0	0	0	0	0	0	0	k__Bacteria; p__Firmicutes; c__Clostridia; o__Clostridiales
OTU_5684	0	1	0	0	1	3	1	0	0	0	0	0	0	0	0	1	1	2	k__Bacteria; p__Firmicutes; c__Clostridia; o__Clostridiales; f__Family XIII
OTU_1409	2	3	0	0	0	0	1	0	2	1	0	2	1	0	0	0	0	0	k__Bacteria; p__Firmicutes; c__Clostridia; o__Clostridiales; f__Lachnospiraceae; g__Acetitomaculum
OTU_7164	1	0	2	0	3	0	0	1	0	0	6	0	0	0	2	0	0	0	k__Bacteria; p__Firmicutes; c__Negativicutes; o__Selenomonadales; f__Veillonellaceae; g__Anaerovibrio; s__rumen bacterium NK4A55
OTU_6875	2	0	0	0	0	0	0	0	0	0	0	0	0	0	0	0	0	0	k__Bacteria; p__Firmicutes; c__Erysipelotrichia; o__Erysipelotrichales; f__Erysipelotrichaceae; g__Erysipelotrichaceae UCG-007; s__marine bacterium SJ-BF12
OTU_1287	0	2	0	0	3	0	0	1	2	0	0	2	2	0	1	2	0	3	k__Bacteria; p__Firmicutes; c__Erysipelotrichia; o__Erysipelotrichales; f__Erysipelotrichaceae; g__uncultured; s__uncultured rumen bacterium
OTU_11103	1	0	0	0	0	0	0	0	0	0	0	3	1	6	0	0	0	0	k__Bacteria; p__Firmicutes; c__Clostridia; o__Clostridiales; f__Lachnospiraceae; g__uncultured
OTU_1941	1	0	0	0	0	0	1	1	0	0	0	1	0	0	1	0	0	0	k__Bacteria; p__Firmicutes; c__Clostridia; o__Clostridiales; f__Ruminococcaceae
OTU_1639	0	1	0	1	0	2	1	4	0	1	6	1	0	1	0	1	0	0	k__Bacteria; p__Firmicutes; c__Clostridia; o__Clostridiales; f__Lachnospiraceae
OTU_1096	1	0	3	0	1	0	6	3	1	0	1	1	0	3	1	5	0	2	k__Bacteria; p__Bacteroidetes; c__Bacteroidia; o__Bacteroidales; f__Muribaculaceae
OTU_2484	0	0	0	0	0	1	0	0	0	0	0	0	0	0	0	1	0	0	k__Bacteria; p__Bacteroidetes; c__Bacteroidia; o__Bacteroidales; f__Prevotellaceae; g__Prevotellaceae UCG-001; s__uncultured rumen bacterium
OTU_1296	2	1	0	3	0	5	1	3	0	3	2	1	2	5	2	8	4	11	k__Bacteria; p__Firmicutes; c__Erysipelotrichia; o__Erysipelotrichales; f__Erysipelotrichaceae; g__Erysipelotrichaceae UCG-004; s__unidentified rumen bacterium RFN20
OTU_1042	0	6	2	2	3	4	1	1	3	0	0	1	3	0	2	0	0	0	k__Bacteria; p__Spirochaetes; c__Spirochaetia; o__Spirochaetales; f__Spirochaetaceae; g__Treponema 2
OTU_656	1	0	52	6	43	21	4	0	17	1	3	1	1	11	10	17	9	5	k__Bacteria; p__Bacteroidetes; c__Bacteroidia; o__Bacteroidales; f__Prevotellaceae
OTU_455	1	0	0	1	0	1	1	2	0	0	1	0	0	0	0	0	2	1	k__Bacteria; p__Firmicutes; c__Clostridia; o__Clostridiales; f__Ruminococcaceae; g__Ruminococcaceae UCG-013; s__uncultured bacterium
OTU_1964	0	0	0	1	0	1	0	0	0	0	0	0	0	0	0	0	0	0	k__Bacteria; p__Firmicutes; c__Erysipelotrichia; o__Erysipelotrichales; f__Erysipelotrichaceae
OTU_3329	0	1	2	0	0	0	0	0	0	0	0	0	1	0	1	0	0	0	k__Bacteria; p__Firmicutes; c__Clostridia; o__Clostridiales; f__Ruminococcaceae; g__[Eubacterium] coprostanoligenes group
OTU_7167	1	0	0	0	0	1	0	0	3	3	2	0	1	0	4	0	0	2	k__Bacteria; p__Firmicutes; c__Clostridia; o__Clostridiales; f__Lachnospiraceae; g__Lachnospiraceae UCG-009
OTU_2360	0	0	0	0	0	0	0	0	0	0	0	0	2	0	0	0	0	0	k__Bacteria; p__Proteobacteria; c__Gammaproteobacteria; o__Aeromonadales; f__Succinivibrionaceae
OTU_9261	1	0	0	0	0	0	0	0	0	0	0	0	0	1	0	0	0	0	k__Bacteria; p__Firmicutes; c__Clostridia; o__Clostridiales; f__Lachnospiraceae
OTU_9405	1	0	0	0	0	0	0	0	0	0	0	0	0	0	0	0	0	0	k__Bacteria; p__Firmicutes; c__Clostridia; o__Clostridiales; f__Lachnospiraceae
OTU_741	1	2	14	5	8	11	3	1	1	1	6	1	9	6	5	6	15	18	k__Bacteria; p__Bacteroidetes; c__Bacteroidia; o__Bacteroidales; f__Prevotellaceae; g__Prevotella 1; s__uncultured rumen bacterium
OTU_1596	0	0	1	0	1	0	0	0	0	0	3	1	0	0	0	0	0	0	k__Bacteria; p__Cyanobacteria; c__Melainabacteria; o__Gastranaerophilales; f__uncultured bacterium; g__uncultured bacterium; s__uncultured bacterium
OTU_6876	1	0	0	0	0	0	0	0	0	0	0	0	0	0	0	0	0	0	k__Bacteria; p__Firmicutes; c__Clostridia; o__Clostridiales; f__Ruminococcaceae
OTU_9067	0	0	0	0	0	0	0	0	0	0	0	0	0	2	0	0	0	0	k__Bacteria; p__Proteobacteria; c__Alphaproteobacteria; o__Rhodospirillales; f__uncultured; g__gut metagenome; s__gut metagenome
OTU_2196	0	2	1	1	0	0	0	0	0	0	2	0	0	0	0	0	0	0	k__Bacteria; p__Firmicutes; c__Erysipelotrichia; o__Erysipelotrichales; f__Erysipelotrichaceae; g__Erysipelotrichaceae UCG-009; s__uncultured rumen bacterium
OTU_444	0	0	5	6	6	5	1	0	0	8	7	2	3	2	9	7	10	13	k__Bacteria; p__Bacteroidetes; c__Bacteroidia; o__Bacteroidales; f__Bacteroidales UCG-001; g__uncultured rumen bacterium; s__uncultured rumen bacterium
OTU_7913	0	2	0	4	0	2	0	1	0	1	3	0	0	1	0	2	0	0	k__Bacteria; p__Firmicutes; c__Clostridia; o__Clostridiales; f__Family XIII; g__[Eubacterium] nodatum group; s__uncultured rumen bacterium
OTU_8434	1	0	1	1	1	0	0	0	0	1	2	1	0	2	0	1	1	0	k__Bacteria; p__Bacteroidetes; c__Bacteroidia; o__Bacteroidales; f__Prevotellaceae; g__Prevotella 1; s__uncultured rumen bacterium
OTU_1471	0	2	0	0	0	2	5	6	0	0	2	1	2	0	0	0	0	0	k__Bacteria; p__Bacteroidetes; c__Bacteroidia; o__Bacteroidales; f__Rikenellaceae; g__Rikenellaceae RC9 gut group
OTU_6877	1	0	0	0	0	0	0	0	0	0	0	0	0	0	0	0	0	0	k__Bacteria
OTU_6899	1	0	0	0	0	0	0	0	0	0	0	0	0	3	0	0	0	0	k__Bacteria; p__Bacteroidetes; c__Bacteroidia; o__Bacteroidales; f__Prevotellaceae; g__Prevotella 1; s__uncultured rumen bacterium
OTU_1421	1	1	3	1	1	0	4	0	1	0	2	0	1	1	0	1	0	0	k__Bacteria
OTU_5551	0	0	0	1	0	0	0	3	0	1	1	3	0	0	1	0	0	0	k__Bacteria; p__Firmicutes; c__Clostridia; o__Clostridiales; f__Lachnospiraceae
OTU_1098	1	1	0	3	4	2	1	0	0	2	3	0	6	0	3	1	1	1	k__Bacteria; p__Firmicutes; c__Erysipelotrichia; o__Erysipelotrichales; f__Erysipelotrichaceae; g__[Anaerorhabdus] furcosa group; s__uncultured rumen bacterium
OTU_2045	0	0	1	3	2	3	0	1	0	1	2	2	1	0	1	3	0	1	k__Bacteria; p__Tenericutes; c__Mollicutes; o__Mollicutes RF39; f__uncultured bacterium; g__uncultured bacterium; s__uncultured bacterium
OTU_9675	2	0	0	0	1	0	0	1	0	0	1	0	0	0	0	0	0	0	k__Bacteria; p__Firmicutes; c__Clostridia; o__Clostridiales
OTU_866	1	1	0	3	0	11	0	0	0	2	0	0	11	0	2	0	0	0	k__Bacteria; p__Firmicutes; c__Clostridia; o__Clostridiales; f__Ruminococcaceae; g__Subdoligranulum
OTU_2370	0	1	0	1	0	2	2	7	2	0	11	5	0	4	1	3	3	2	k__Bacteria; p__Firmicutes; c__Clostridia; o__Clostridiales; f__Ruminococcaceae
OTU_9619	0	0	1	3	2	1	0	2	2	0	2	2	3	1	1	2	0	0	k__Bacteria; p__Firmicutes; c__Clostridia; o__Clostridiales; f__Christensenellaceae; g__Christensenellaceae R-7 group
OTU_1056	1	0	1	4	4	1	0	2	1	0	1	0	1	0	1	1	5	5	k__Bacteria; p__Spirochaetes; c__Spirochaetia; o__Spirochaetales; f__Spirochaetaceae; g__Treponema 2; s__uncultured rumen bacterium
OTU_10357	1	0	0	0	0	0	1	1	0	1	0	0	0	0	0	0	1	0	k__Bacteria; p__Firmicutes; c__Erysipelotrichia; o__Erysipelotrichales; f__Erysipelotrichaceae; g__uncultured; s__uncultured rumen bacterium
OTU_2411	0	11	5	0	4	3	1	1	1	4	4	1	1	2	5	6	1	1	k__Bacteria; p__Bacteroidetes; c__Bacteroidia; o__Bacteroidales; f__Prevotellaceae; g__Prevotella 1; s__uncultured rumen bacterium
OTU_7193	0	4	2	1	4	4	3	2	4	2	1	1	1	2	6	6	6	0	k__Bacteria; p__Bacteroidetes; c__Bacteroidia; o__Bacteroidales; f__Prevotellaceae
OTU_2213	0	3	1	1	4	2	23	4	0	6	1	3	0	0	7	3	0	0	k__Bacteria; p__Bacteroidetes; c__Bacteroidia; o__Bacteroidales; f__Muribaculaceae; g__uncultured rumen bacterium; s__uncultured rumen bacterium
OTU_876	0	8	12	5	2	6	1	0	1	0	2	1	1	0	6	5	1	0	k__Bacteria; p__Bacteroidetes; c__Bacteroidia; o__Bacteroidales; f__Prevotellaceae; g__Prevotellaceae NK3B31 group; s__uncultured rumen bacterium
OTU_10825	0	0	0	0	0	0	1	0	0	1	0	0	0	0	0	1	0	0	k__Bacteria; p__Bacteroidetes; c__Bacteroidia; o__Bacteroidales; f__Rikenellaceae; g__Rikenellaceae RC9 gut group
OTU_2115	0	1	0	0	0	0	0	0	0	0	1	0	0	0	0	0	0	0	k__Bacteria; p__Firmicutes; c__Clostridia; o__Clostridiales; f__Eubacteriaceae; g__Anaerofustis; s__uncultured bacterium
OTU_1831	0	1	7	1	10	3	0	2	3	0	14	1	2	5	6	21	11	6	k__Bacteria; p__Firmicutes; c__Clostridia; o__Clostridiales; f__Ruminococcaceae; g__Ruminococcaceae UCG-014
OTU_461	0	2	0	6	12	6	3	2	4	2	1	6	7	2	4	1	2	3	k__Bacteria; p__Firmicutes; c__Clostridia; o__Clostridiales; f__Ruminococcaceae; g__Ruminococcaceae UCG-010; s__uncultured rumen bacterium 4C0d-9
OTU_4455	0	0	0	0	0	0	0	0	0	1	0	2	0	0	0	2	0	0	k__Bacteria; p__Firmicutes; c__Clostridia; o__Clostridiales; f__Lachnospiraceae
OTU_1256	0	0	0	2	0	1	0	0	1	0	0	1	1	0	0	0	0	3	k__Bacteria; p__Proteobacteria; c__Gammaproteobacteria; o__Cardiobacteriales; f__Cardiobacteriaceae; g__Suttonella
OTU_1692	0	2	0	0	0	2	0	0	0	0	1	0	0	0	0	0	0	0	k__Bacteria; p__Firmicutes; c__Clostridia; o__Clostridiales; f__Ruminococcaceae
OTU_5018	0	3	0	0	0	0	2	0	0	4	0	0	0	0	0	0	0	0	k__Bacteria; p__Firmicutes; c__Clostridia; o__Clostridiales; f__Lachnospiraceae
OTU_10949	0	0	0	0	0	0	1	1	1	0	0	0	0	0	0	0	0	0	k__Bacteria; p__Bacteroidetes; c__Bacteroidia; o__Bacteroidales; f__Prevotellaceae; g__Prevotellaceae UCG-001; s__uncultured rumen bacterium
OTU_2551	0	2	0	1	0	0	0	3	0	0	3	1	1	3	0	4	3	2	k__Bacteria; p__Firmicutes; c__Clostridia; o__Clostridiales; f__Ruminococcaceae
OTU_9403	0	1	0	0	0	0	0	0	0	0	0	0	0	0	0	0	0	0	k__Bacteria; p__Firmicutes; c__Clostridia; o__Clostridiales; f__Ruminococcaceae; g__[Eubacterium] coprostanoligenes group
OTU_2770	0	2	0	0	2	0	0	1	0	2	1	0	0	5	0	0	3	1	k__Bacteria; p__Firmicutes; c__Clostridia; o__Clostridiales; f__Ruminococcaceae; g__Ruminococcaceae UCG-010; s__uncultured rumen bacterium
OTU_8385	0	1	0	0	0	0	0	0	0	0	0	0	0	0	0	0	1	0	k__Bacteria; p__Firmicutes; c__Clostridia; o__Clostridiales; f__Lachnospiraceae; g__Lachnospiraceae NK3A20 group
OTU_237	0	1	0	0	0	0	0	0	0	0	0	0	0	0	0	0	0	0	k__Bacteria; p__Firmicutes; c__Clostridia; o__Clostridiales; f__Ruminococcaceae; g__[Eubacterium] coprostanoligenes group
OTU_2291	0	0	0	0	0	0	1	0	2	0	0	1	0	4	0	0	0	0	k__Bacteria; p__Bacteroidetes; c__Bacteroidia; o__Bacteroidales; f__Rikenellaceae
OTU_8733	0	0	0	0	0	0	0	0	0	0	0	0	0	0	0	1	0	0	k__Bacteria; p__Bacteroidetes; c__Bacteroidia; o__Bacteroidales
OTU_1459	0	1	0	4	1	0	0	1	0	0	2	0	3	1	0	1	1	3	k__Bacteria; p__Firmicutes; c__Clostridia; o__Clostridiales; f__Christensenellaceae
OTU_2607	0	1	2	2	1	3	8	3	1	3	3	0	4	5	2	0	2	0	k__Bacteria; p__Bacteroidetes; c__Bacteroidia; o__Bacteroidales; f__Prevotellaceae; g__Prevotella 1
OTU_958	0	0	0	0	0	1	0	1	0	0	0	1	3	0	2	1	0	0	k__Bacteria; p__Firmicutes; c__Clostridia; o__Clostridiales; f__Ruminococcaceae; g__Papillibacter; s__uncultured bacterium
OTU_451	0	8	6	23	13	10	11	1	5	4	7	4	5	5	5	11	2	26	k__Bacteria; p__Bacteroidetes; c__Bacteroidia; o__Bacteroidales; f__F082
OTU_282	0	9	10	26	8	13	3	13	29	2	18	11	10	13	13	20	21	13	k__Bacteria; p__Firmicutes; c__Clostridia; o__Clostridiales; f__Ruminococcaceae; g__Ruminococcaceae UCG-014; s__uncultured rumen bacterium
OTU_1415	0	7	0	2	0	3	0	0	4	1	1	1	1	0	0	0	0	0	k__Bacteria; p__Tenericutes; c__Mollicutes; o__Mollicutes RF39
OTU_2029	0	1	2	0	2	2	0	0	0	1	0	2	1	0	1	0	0	0	k__Bacteria; p__Bacteroidetes; c__Bacteroidia; o__Bacteroidales; f__Prevotellaceae; g__Prevotella 1
OTU_1734	0	1	0	1	1	0	0	0	1	0	0	0	0	1	1	0	0	2	k__Bacteria
OTU_528	0	1	10	12	5	4	3	4	6	0	14	3	9	0	6	11	16	10	k__Bacteria; p__Firmicutes; c__Clostridia; o__Clostridiales; f__Lachnospiraceae; g__Lachnospiraceae NK3A20 group; s__uncultured bacterium
OTU_852	0	3	1	2	1	7	2	0	0	1	1	0	2	1	0	0	0	0	k__Bacteria; p__Firmicutes; c__Clostridia; o__Clostridiales; f__Ruminococcaceae
OTU_10501	0	2	0	1	1	0	0	0	0	0	0	0	0	2	0	0	0	0	k__Bacteria; p__Firmicutes; c__Clostridia; o__Clostridiales; f__Lachnospiraceae
OTU_1430	0	0	1	3	7	1	0	0	9	3	1	0	0	0	0	3	4	2	k__Bacteria; p__Bacteroidetes; c__Bacteroidia; o__Bacteroidales; f__uncultured; g__uncultured rumen bacterium; s__uncultured rumen bacterium
OTU_3065	0	1	5	0	1	0	3	5	0	4	2	2	1	0	2	0	2	0	k__Bacteria; p__Bacteroidetes; c__Bacteroidia; o__Bacteroidales; f__Prevotellaceae; g__Prevotella 7; s__uncultured bacterium
OTU_1049	0	1	3	0	5	0	1	0	4	0	0	0	0	0	0	2	6	3	k__Bacteria; p__Bacteroidetes; c__Bacteroidia
OTU_2094	0	2	0	1	0	3	2	1	0	0	1	4	0	0	0	0	0	0	k__Bacteria; p__Firmicutes; c__Clostridia; o__Clostridiales; f__Lachnospiraceae; g__[Eubacterium] ruminantium group; s__uncultured bacterium
OTU_7680	0	2	0	0	0	0	0	0	0	0	0	0	0	0	2	0	0	0	k__Bacteria; p__Bacteroidetes; c__Bacteroidia; o__Bacteroidales; f__Prevotellaceae
OTU_1334	0	0	8	1	14	1	1	0	4	2	0	1	2	0	6	6	32	53	k__Bacteria; p__Firmicutes; c__Clostridia; o__Clostridiales; f__Christensenellaceae; g__Christensenellaceae R-7 group; s__uncultured rumen bacterium
OTU_10814	0	2	0	0	0	0	0	0	0	0	1	0	0	3	0	0	0	0	k__Bacteria; p__Firmicutes; c__Clostridia; o__Clostridiales; f__Ruminococcaceae; g__Ruminococcaceae UCG-014
OTU_6856	0	1	0	0	0	2	5	1	3	0	2	1	3	1	0	0	0	4	k__Bacteria
OTU_1423	0	1	3	0	0	3	0	3	0	0	5	0	1	0	0	0	2	4	k__Bacteria; p__Bacteroidetes; c__Bacteroidia; o__Bacteroidales; f__Prevotellaceae; g__Prevotellaceae UCG-001
OTU_2620	0	2	6	0	6	0	2	2	1	0	6	2	1	10	4	5	2	6	k__Bacteria; p__Firmicutes; c__Clostridia; o__Clostridiales; f__Ruminococcaceae; g__Ruminococcaceae NK4A214 group; s__uncultured bacterium
OTU_3532	0	1	0	1	1	0	0	0	0	0	0	0	0	0	0	2	0	1	k__Bacteria
OTU_1385	0	1	2	0	5	0	1	1	0	0	1	1	0	0	0	0	0	0	k__Bacteria; p__Proteobacteria; c__Alphaproteobacteria; o__Rhodospirillales; f__uncultured
OTU_2272	0	2	0	0	0	0	0	0	1	0	0	0	0	0	0	0	0	0	k__Bacteria; p__Bacteroidetes; c__Bacteroidia; o__Bacteroidales; f__F082
OTU_1146	0	0	5	1	3	9	1	4	1	2	4	3	4	3	2	3	2	0	k__Bacteria; p__Bacteroidetes; c__Bacteroidia; o__Bacteroidales; f__Prevotellaceae; g__Prevotella 1
OTU_5474	0	0	0	0	0	0	0	0	0	1	0	0	0	1	0	1	0	0	k__Bacteria; p__Bacteroidetes; c__Bacteroidia; o__Bacteroidales; f__Prevotellaceae; g__Prevotella 7
OTU_1761	0	1	0	5	0	0	0	0	4	0	0	1	0	0	1	0	3	0	k__Bacteria; p__Bacteroidetes; c__Bacteroidia; o__Bacteroidales; f__F082
OTU_1669	0	1	0	0	0	2	0	0	0	0	0	1	0	1	0	0	0	0	k__Bacteria; p__Firmicutes; c__Clostridia; o__Clostridiales; f__Lachnospiraceae
OTU_8764	0	1	1	0	0	2	3	14	0	4	2	2	0	3	4	1	2	0	k__Bacteria; p__Bacteroidetes; c__Bacteroidia; o__Bacteroidales; f__Prevotellaceae; g__Prevotella 7; s__uncultured bacterium
OTU_5008	0	1	0	0	2	1	1	0	1	0	1	0	3	6	0	2	1	10	k__Bacteria; p__Firmicutes; c__Clostridia; o__Clostridiales; f__Ruminococcaceae; g__Ruminococcaceae NK4A214 group
OTU_10230	0	0	2	0	0	1	0	0	0	0	0	1	0	0	1	0	0	0	k__Bacteria; p__Firmicutes; c__Negativicutes; o__Selenomonadales; f__Veillonellaceae
OTU_9680	0	2	0	0	0	0	0	0	0	0	0	0	0	0	0	0	0	0	k__Bacteria; p__Firmicutes; c__Clostridia; o__Clostridiales
OTU_606	0	1	11	7	8	5	0	2	8	0	3	0	5	2	13	5	24	20	k__Bacteria; p__Bacteroidetes; c__Bacteroidia; o__Bacteroidales; f__Prevotellaceae; g__Prevotella 1
OTU_3263	0	5	0	0	2	1	0	1	0	0	4	0	1	3	0	3	1	0	k__Bacteria; p__Bacteroidetes; c__Bacteroidia; o__Bacteroidales; f__Prevotellaceae
OTU_1078	0	0	0	4	2	1	2	0	1	0	2	1	3	2	0	1	0	0	k__Bacteria; p__Bacteroidetes; c__Bacteroidia; o__Bacteroidales; f__Bacteroidales BS11 gut group; g__uncultured bacterium; s__uncultured bacterium
OTU_1183	0	3	2	4	1	2	1	0	1	1	5	2	2	4	4	2	2	3	k__Bacteria; p__Bacteroidetes; c__Bacteroidia; o__Bacteroidales; f__Prevotellaceae; g__Prevotella 1
OTU_2065	0	1	0	0	2	5	0	0	1	0	0	0	1	0	0	1	1	1	k__Bacteria; p__Bacteroidetes; c__Bacteroidia; o__Bacteroidales; f__Prevotellaceae; g__Prevotellaceae UCG-001; s__uncultured rumen bacterium
OTU_9473	0	2	1	0	1	0	0	1	1	1	2	0	0	0	1	0	0	0	k__Bacteria; p__Bacteroidetes; c__Bacteroidia; o__Bacteroidales; f__Prevotellaceae
OTU_1276	0	4	0	17	5	0	0	0	2	0	0	0	0	0	0	0	0	0	k__Bacteria; p__Firmicutes; c__Clostridia; o__Clostridiales; f__Ruminococcaceae; g__[Eubacterium] coprostanoligenes group; s__uncultured bacterium
OTU_1025	0	3	20	5	19	11	1	3	1	3	3	2	10	2	0	2	1	0	k__Bacteria; p__Firmicutes; c__Clostridia; o__Clostridiales; f__Ruminococcaceae; g__Ruminococcus 1; s__uncultured rumen bacterium
OTU_2469	0	1	0	2	0	1	1	0	1	0	0	0	0	0	0	1	1	0	k__Bacteria; p__Firmicutes; c__Erysipelotrichia; o__Erysipelotrichales; f__Erysipelotrichaceae; g__Solobacterium; s__uncultured rumen bacterium
OTU_1332	0	5	1	13	3	0	0	0	3	1	0	1	1	0	1	3	5	0	k__Bacteria; p__Firmicutes; c__Bacilli; o__Lactobacillales; f__Lactobacillaceae; g__Lactobacillus; s__Lactobacillus reuteri
OTU_9792	0	0	0	0	0	0	0	0	0	0	0	0	0	0	0	0	0	0	k__Bacteria; p__Bacteroidetes; c__Bacteroidia; o__Bacteroidales; f__Prevotellaceae; g__Prevotella 1
OTU_1260	0	5	0	3	9	4	3	0	1	0	1	0	2	1	3	0	2	0	k__Bacteria; p__Bacteroidetes; c__Bacteroidia; o__Bacteroidales; f__Prevotellaceae; g__Prevotella 1; s__uncultured rumen bacterium
OTU_1356	0	0	0	0	0	0	0	0	0	0	1	0	0	0	0	0	0	0	k__Bacteria; p__Firmicutes; c__Clostridia; o__Clostridiales; f__Lachnospiraceae
OTU_3985	0	2	0	0	0	1	0	0	0	0	1	0	1	0	1	0	0	1	k__Bacteria; p__Cyanobacteria; c__Melainabacteria; o__Gastranaerophilales; f__uncultured rumen bacterium; g__uncultured rumen bacterium; s__uncultured rumen bacterium
OTU_2002	0	1	1	0	1	0	1	0	1	0	0	0	2	0	1	0	0	0	k__Bacteria; p__Firmicutes; c__Clostridia; o__Clostridiales; f__Ruminococcaceae
OTU_6220	0	1	0	0	0	3	0	0	3	0	0	1	0	2	0	0	1	0	k__Bacteria; p__Bacteroidetes; c__Bacteroidia; o__Bacteroidales; f__Prevotellaceae
OTU_1607	0	1	0	1	0	0	0	0	4	0	0	1	1	0	0	0	0	0	k__Bacteria; p__Firmicutes; c__Clostridia; o__Clostridiales; f__Ruminococcaceae; g__Ruminococcaceae UCG-003
OTU_126	0	0	0	0	0	0	1	1	1	1	0	0	0	0	0	0	0	1	k__Bacteria; p__Firmicutes; c__Clostridia; o__Clostridiales; f__Lachnospiraceae; g__Tyzzerella 4; s__uncultured bacterium
OTU_8210	0	1	0	0	0	0	0	0	0	0	0	0	0	0	0	0	0	1	k__Bacteria; p__Firmicutes; c__Clostridia; o__Clostridiales; f__Lachnospiraceae
OTU_4163	0	1	0	0	0	0	0	0	0	0	0	0	0	0	0	1	0	0	k__Bacteria; p__Firmicutes; c__Clostridia; o__Clostridiales; f__Family XIII
OTU_2270	0	1	0	1	0	0	0	0	0	0	0	0	0	2	0	0	0	0	k__Bacteria; p__Actinobacteria; c__Acidimicrobiia; o__Microtrichales; f__Ilumatobacteraceae
OTU_7973	0	2	0	0	0	0	0	0	0	0	1	0	1	0	0	0	0	0	k__Bacteria; p__Firmicutes; c__Clostridia; o__Clostridiales; f__Lachnospiraceae
OTU_3881	0	1	0	0	1	0	0	0	0	2	0	0	0	0	0	0	0	0	k__Bacteria; p__Firmicutes; c__Clostridia; o__Clostridiales; f__Lachnospiraceae
OTU_1041	0	1	2	0	5	0	0	0	1	0	2	0	0	0	0	3	0	5	k__Bacteria; p__Bacteroidetes; c__Bacteroidia; o__Bacteroidales; f__Rikenellaceae; g__Rikenellaceae RC9 gut group; s__uncultured rumen bacterium
OTU_5172	0	1	0	0	0	0	0	0	0	0	0	0	0	0	0	2	0	0	k__Bacteria; p__Bacteroidetes; c__Bacteroidia; o__Bacteroidales; f__Prevotellaceae
OTU_8930	0	1	3	0	0	1	0	0	1	0	1	3	0	2	0	0	0	0	k__Bacteria; p__Bacteroidetes; c__Bacteroidia; o__Bacteroidales; f__Prevotellaceae; g__Prevotellaceae UCG-003; s__uncultured rumen bacterium
OTU_9845	0	2	0	0	0	0	0	0	0	0	0	0	0	0	0	0	1	1	k__Bacteria; p__Firmicutes; c__Clostridia; o__Clostridiales; f__Ruminococcaceae
OTU_2027	0	2	2	1	1	2	0	0	0	0	1	0	0	1	0	2	1	0	k__Bacteria; p__Bacteroidetes; c__Bacteroidia; o__Bacteroidales; f__Prevotellaceae; g__Prevotella 1; s__uncultured rumen bacterium
OTU_7574	0	0	0	0	0	0	0	0	0	0	0	0	0	0	0	0	0	0	k__Bacteria
OTU_1059	0	3	0	1	0	6	0	0	1	0	1	5	1	0	1	0	0	0	k__Bacteria; p__Firmicutes; c__Erysipelotrichia; o__Erysipelotrichales; f__Erysipelotrichaceae; g__Erysipelotrichaceae UCG-004
OTU_1017	0	2	2	6	3	1	1	4	2	1	2	1	0	1	1	0	2	0	k__Bacteria; p__Bacteroidetes; c__Bacteroidia; o__Bacteroidales; f__F082; g__uncultured rumen bacterium; s__uncultured rumen bacterium
OTU_7051	0	0	0	0	1	0	0	0	0	0	0	0	0	0	0	0	0	0	k__Bacteria; p__Bacteroidetes; c__Bacteroidia; o__Bacteroidales; f__Prevotellaceae; g__Alloprevotella
OTU_1495	0	1	0	3	0	1	1	0	2	1	2	1	1	0	0	0	0	0	k__Bacteria; p__Bacteroidetes; c__Bacteroidia; o__Bacteroidales; f__F082; g__uncultured rumen bacterium; s__uncultured rumen bacterium
OTU_6546	0	2	0	1	6	1	0	0	4	0	0	0	3	0	0	5	2	0	k__Bacteria; p__Firmicutes; c__Clostridia; o__Clostridiales; f__Ruminococcaceae
OTU_1569	0	1	7	1	1	1	0	0	0	1	4	1	2	0	2	3	2	1	k__Bacteria; p__Bacteroidetes; c__Bacteroidia; o__Bacteroidales; f__Prevotellaceae; g__Prevotellaceae UCG-001; s__uncultured rumen bacterium
OTU_2214	0	1	1	0	0	0	1	1	0	0	0	0	0	0	0	0	0	0	k__Bacteria; p__Firmicutes; c__Clostridia; o__Clostridiales; f__Peptococcaceae
OTU_587	0	1	1	8	23	1	3	0	1	1	2	1	1	5	9	3	8	30	k__Bacteria; p__Bacteroidetes; c__Bacteroidia; o__Bacteroidales; f__Rikenellaceae; g__Rikenellaceae RC9 gut group; s__uncultured bacterium
OTU_8192	0	2	0	0	0	0	1	0	0	4	0	1	1	0	1	0	0	0	k__Bacteria; p__Firmicutes; c__Clostridia; o__Clostridiales; f__Ruminococcaceae; g__Ruminococcus 1
OTU_2242	0	1	0	0	0	1	1	0	0	0	0	0	0	3	0	0	0	0	k__Bacteria; p__Firmicutes; c__Clostridia; o__Clostridiales; f__Family XIII; g__Anaerovorax
OTU_8102	0	1	1	0	0	2	0	0	0	1	1	0	1	0	1	2	2	0	k__Bacteria; p__Firmicutes; c__Clostridia; o__Clostridiales; f__Ruminococcaceae; g__Ruminococcaceae UCG-014
OTU_844	0	3	1	5	1	2	1	1	9	3	4	1	7	12	1	5	11	5	k__Bacteria; p__Bacteroidetes; c__Bacteroidia; o__Bacteroidales; f__Rikenellaceae; g__Rikenellaceae RC9 gut group; s__uncultured rumen bacterium
OTU_1111	0	4	2	1	1	1	4	1	2	0	2	1	0	3	3	1	0	0	k__Bacteria; p__Synergistetes; c__Synergistia; o__Synergistales; f__Synergistaceae; g__Synergistes; s__Synergistes jonesii
OTU_2170	0	5	1	0	1	0	1	0	0	4	0	0	2	0	0	1	0	0	k__Bacteria; p__Proteobacteria; c__Alphaproteobacteria; o__Rhodospirillales; f__uncultured
OTU_4568	0	4	1	0	0	2	1	1	0	0	0	1	0	0	4	2	0	0	k__Bacteria; p__Bacteroidetes; c__Bacteroidia; o__Bacteroidales; f__Prevotellaceae; g__Prevotella 1; s__uncultured rumen bacterium
OTU_1723	0	1	1	0	0	1	2	1	3	0	3	1	3	1	1	2	2	1	k__Bacteria; p__Firmicutes; c__Clostridia; o__Clostridiales; f__Ruminococcaceae; g__Papillibacter
OTU_7460	0	1	1	0	1	1	1	3	0	0	6	0	0	2	2	2	2	3	k__Bacteria; p__Firmicutes; c__Clostridia; o__Clostridiales; f__Ruminococcaceae
OTU_11088	0	3	0	0	0	0	4	0	0	0	1	0	0	1	2	0	0	0	k__Bacteria; p__Bacteroidetes; c__Bacteroidia; o__Bacteroidales; f__Muribaculaceae; g__uncultured rumen bacterium; s__uncultured rumen bacterium
OTU_1245	0	2	3	3	4	2	1	2	3	0	2	2	1	2	1	4	2	0	k__Bacteria; p__Firmicutes; c__Clostridia; o__Clostridiales; f__Lachnospiraceae; g__Lachnospiraceae ND3007 group
OTU_649	0	4	6	10	16	1	3	4	1	1	3	7	6	2	3	7	27	16	k__Bacteria; p__Firmicutes; c__Clostridia; o__Clostridiales; f__Ruminococcaceae; g__Ruminococcaceae UCG-010; s__uncultured rumen bacterium
OTU_667	0	2	6	14	6	2	2	1	13	0	3	3	18	1	3	1	2	3	k__Bacteria; p__Firmicutes; c__Clostridia; o__Clostridiales; f__Lachnospiraceae; g__Lachnospiraceae NK3A20 group
OTU_1661	0	0	0	0	0	0	0	0	0	0	0	0	0	0	0	0	0	0	k__Bacteria; p__Bacteroidetes; c__Bacteroidia; o__Bacteroidales; f__Bacteroidales BS11 gut group; g__uncultured rumen bacterium; s__uncultured rumen bacterium
OTU_4472	0	0	0	0	1	0	0	0	0	0	2	0	0	0	1	0	1	2	k__Bacteria; p__Bacteroidetes; c__Bacteroidia; o__Bacteroidales; f__F082; g__uncultured rumen bacterium; s__uncultured rumen bacterium
OTU_9218	0	4	5	1	5	2	4	1	0	4	1	0	1	12	3	4	3	0	k__Bacteria; p__Bacteroidetes; c__Bacteroidia; o__Bacteroidales; f__Prevotellaceae; g__Prevotella 1
OTU_4971	0	1	1	0	0	0	0	0	2	0	0	0	0	0	1	0	0	1	k__Bacteria; p__Firmicutes; c__Clostridia; o__Clostridiales; f__Lachnospiraceae
OTU_1533	0	2	4	0	10	4	2	4	10	3	5	0	9	1	1	6	5	19	k__Bacteria; p__Firmicutes; c__Clostridia; o__Clostridiales; f__Christensenellaceae; g__Christensenellaceae R-7 group; s__uncultured rumen bacterium
OTU_10310	0	2	0	0	0	0	0	0	0	0	0	0	0	0	0	0	0	0	k__Bacteria; p__Firmicutes; c__Clostridia; o__Clostridiales
OTU_203	0	1	24	15	13	8	12	17	9	1	14	16	36	25	21	23	27	20	k__Bacteria; p__Firmicutes; c__Clostridia; o__Clostridiales; f__Ruminococcaceae; g__Ruminococcaceae UCG-014; s__uncultured rumen bacterium
OTU_2329	0	0	0	0	2	0	0	0	0	0	1	0	0	0	0	0	0	0	k__Bacteria; p__Firmicutes; c__Erysipelotrichia; o__Erysipelotrichales; f__Erysipelotrichaceae; g__[Anaerorhabdus] furcosa group; s__uncultured rumen bacterium
OTU_8341	0	1	0	0	0	0	0	0	0	0	0	0	0	0	0	0	0	0	k__Bacteria; p__Firmicutes; c__Clostridia; o__Clostridiales; f__Ruminococcaceae; g__Ruminococcus 2
OTU_2735	0	0	3	0	0	1	1	0	0	0	0	0	0	0	0	0	0	0	k__Bacteria; p__Firmicutes; c__Clostridia; o__Clostridiales; f__Ruminococcaceae; g__Ruminococcus 1
OTU_2159	0	0	0	0	0	0	0	1	1	0	0	0	2	0	0	0	0	0	k__Bacteria; p__Proteobacteria; c__Alphaproteobacteria; o__Paracaedibacterales; f__Paracaedibacteraceae; g__uncultured
OTU_5009	0	3	0	1	0	1	0	0	0	1	0	0	2	1	0	0	0	0	k__Bacteria; p__Firmicutes; c__Clostridia; o__Clostridiales; f__Lachnospiraceae; g__uncultured; s__Lachnospiraceae bacterium CG55
OTU_968	0	1	21	0	1	5	0	1	2	1	2	1	1	0	4	2	0	1	k__Bacteria; p__Bacteroidetes; c__Bacteroidia; o__Bacteroidales; f__Prevotellaceae; g__Prevotella 1; s__uncultured rumen bacterium
OTU_2287	0	3	10	1	16	0	1	5	0	1	3	1	2	2	10	10	8	4	k__Bacteria; p__Bacteroidetes; c__Bacteroidia; o__Bacteroidales; f__Prevotellaceae; g__Prevotella 1
OTU_963	0	7	4	1	4	4	0	1	12	1	5	0	5	3	6	6	7	15	k__Bacteria; p__Firmicutes; c__Clostridia; o__Clostridiales; f__Lachnospiraceae; g__[Eubacterium] hallii group; s__uncultured bacterium
OTU_1446	0	1	0	0	0	1	0	0	0	0	0	0	0	2	0	0	0	0	k__Bacteria; p__Firmicutes; c__Clostridia; o__Clostridiales; f__Ruminococcaceae; g__Ruminococcaceae UCG-010
OTU_817	0	4	3	0	4	3	2	0	3	2	2	2	6	4	1	4	5	5	k__Bacteria; p__Bacteroidetes; c__Bacteroidia; o__Bacteroidales; f__Rikenellaceae; g__U29-B03; s__uncultured rumen bacterium
OTU_9670	0	2	0	1	0	0	0	1	0	0	1	1	0	0	0	0	0	0	k__Bacteria; p__Bacteroidetes; c__Bacteroidia; o__Bacteroidales; f__Prevotellaceae; g__Prevotella 1
OTU_2081	0	1	0	0	0	2	0	0	0	0	1	0	0	0	0	0	0	0	k__Bacteria; p__Firmicutes; c__Clostridia; o__Clostridiales; f__Ruminococcaceae; g__Ruminococcaceae V9D2013 group; s__uncultured rumen bacterium
OTU_2976	0	2	0	0	0	0	0	0	0	0	0	0	0	0	0	0	0	0	k__Bacteria
OTU_10827	0	1	1	0	0	0	1	0	0	0	1	0	0	0	0	0	0	0	k__Bacteria; p__Bacteroidetes; c__Bacteroidia; o__Bacteroidales; f__Prevotellaceae; g__Prevotella 1; s__uncultured rumen bacterium
OTU_2055	0	0	0	0	0	0	0	0	5	2	0	0	3	0	0	0	0	0	k__Bacteria; p__Firmicutes; c__Clostridia; o__Clostridiales; f__Family XIII; g__[Eubacterium] nodatum group
OTU_6285	0	1	0	0	0	0	0	0	0	0	0	0	0	0	2	0	2	0	k__Bacteria; p__Firmicutes; c__Clostridia; o__Clostridiales; f__Lachnospiraceae
OTU_3305	0	1	2	1	3	1	1	0	0	2	1	1	0	4	1	2	0	0	k__Bacteria; p__Firmicutes; c__Clostridia; o__Clostridiales; f__Family XIII; g__Anaerovorax; s__uncultured rumen bacterium
OTU_2376	0	0	0	0	0	2	0	0	2	0	0	0	0	1	0	0	0	0	k__Bacteria; p__Bacteroidetes; c__Bacteroidia; o__Bacteroidales; f__Rikenellaceae; g__Rikenellaceae RC9 gut group; s__uncultured Bacteroidales bacterium
OTU_6559	0	0	0	0	1	3	3	0	2	2	0	1	1	4	2	1	3	1	k__Bacteria; p__Bacteroidetes; c__Bacteroidia; o__Bacteroidales; f__Prevotellaceae; g__Prevotella 1; s__uncultured bacterium
OTU_4865	0	1	0	0	0	2	0	0	1	1	0	0	0	2	1	3	1	1	k__Bacteria; p__Firmicutes; c__Clostridia; o__Clostridiales; f__Ruminococcaceae
OTU_53	0	1	0	0	1	0	1	0	0	0	1	2	0	1	0	2	3	0	k__Bacteria; p__Firmicutes; c__Clostridia; o__Clostridiales; f__Ruminococcaceae; g__Ruminococcaceae UCG-005; s__uncultured bacterium
OTU_3936	0	1	5	1	12	3	2	0	2	1	4	3	12	18	6	11	19	29	k__Bacteria; p__Firmicutes; c__Clostridia; o__Clostridiales; f__Ruminococcaceae; g__Ruminococcaceae NK4A214 group
OTU_7566	0	1	0	0	0	0	1	2	0	0	0	0	0	1	0	0	0	0	k__Bacteria; p__Firmicutes; c__Clostridia; o__Clostridiales; f__Ruminococcaceae; g__Ruminococcaceae UCG-014
OTU_7922	0	1	0	0	0	1	0	3	0	1	0	1	0	3	2	0	0	0	k__Bacteria; p__Bacteroidetes; c__Bacteroidia; o__Bacteroidales; f__Prevotellaceae; g__Prevotella 7
OTU_9393	0	2	0	0	0	0	0	0	0	0	0	0	0	0	0	0	0	0	k__Bacteria; p__Firmicutes
OTU_1352	0	3	1	4	11	1	0	0	10	1	3	3	2	0	1	0	2	0	k__Bacteria; p__Bacteroidetes; c__Bacteroidia; o__Bacteroidales; f__Prevotellaceae; g__Prevotellaceae UCG-001; s__uncultured bacterium
OTU_2813	0	1	1	2	0	1	1	2	1	1	1	8	3	0	0	12	2	4	k__Bacteria; p__Firmicutes; c__Clostridia; o__Clostridiales; f__Ruminococcaceae; g__Ruminococcaceae UCG-014
OTU_406	0	7	19	43	39	14	9	7	1	13	40	8	73	44	19	6	33	9	k__Bacteria; p__Firmicutes; c__Clostridia; o__Clostridiales; f__Ruminococcaceae; g__Ruminococcaceae UCG-014
OTU_3240	0	0	0	0	0	1	0	0	0	1	0	0	0	0	0	0	1	0	k__Bacteria; p__Bacteroidetes; c__Bacteroidia; o__Bacteroidales; f__F082; g__uncultured bacterium; s__uncultured bacterium
OTU_1695	0	0	0	2	1	0	0	1	0	1	3	1	1	0	0	0	0	0	k__Bacteria; p__Tenericutes; c__Mollicutes; o__Mollicutes RF39; f__uncultured bacterium; g__uncultured bacterium; s__uncultured bacterium
OTU_7720	0	0	0	0	0	0	0	0	0	0	0	0	0	0	0	0	0	0	k__Bacteria; p__Bacteroidetes; c__Bacteroidia; o__Bacteroidales
OTU_1137	0	0	0	0	0	1	0	0	0	0	0	0	1	0	0	2	0	0	k__Bacteria; p__Firmicutes; c__Clostridia; o__Clostridiales; f__Ruminococcaceae; g__Ruminiclostridium 1; s__uncultured bacterium
OTU_4326	0	1	0	0	0	0	0	0	0	0	0	1	1	1	0	0	0	0	k__Bacteria; p__Firmicutes; c__Clostridia; o__Clostridiales
OTU_7518	0	2	0	0	0	0	0	0	0	0	0	0	0	0	0	0	0	0	k__Bacteria; p__Firmicutes; c__Clostridia; o__Clostridiales; f__Ruminococcaceae; g__Ruminococcus 1
OTU_689	0	6	8	3	11	4	4	3	2	2	8	9	6	4	2	1	2	2	k__Bacteria; p__Bacteroidetes; c__Bacteroidia; o__Bacteroidales; f__Prevotellaceae
OTU_8651	0	2	0	0	0	0	0	0	0	0	0	0	0	0	0	0	0	0	k__Bacteria; p__Bacteroidetes; c__Bacteroidia; o__Bacteroidales; f__Muribaculaceae; g__uncultured bacterium; s__uncultured bacterium
OTU_1740	0	0	0	0	0	0	1	0	6	0	0	0	0	0	0	0	0	0	k__Bacteria; p__Proteobacteria; c__Gammaproteobacteria; o__Betaproteobacteriales; f__Burkholderiaceae
OTU_1974	0	2	1	0	0	2	0	0	1	0	2	2	1	1	0	1	0	0	k__Bacteria; p__Firmicutes; c__Clostridia; o__Clostridiales; f__Lachnospiraceae
OTU_5244	0	0	0	0	0	0	0	0	0	0	0	0	0	0	0	0	1	0	k__Bacteria; p__Bacteroidetes; c__Bacteroidia; o__Bacteroidales; f__Prevotellaceae; g__Prevotella 1; s__uncultured rumen bacterium
OTU_8824	0	1	0	0	0	0	0	1	0	0	0	0	0	0	0	1	0	0	k__Bacteria; p__Firmicutes; c__Clostridia; o__Clostridiales; f__Lachnospiraceae
OTU_888	0	1	0	4	3	2	0	0	0	0	1	0	0	0	0	5	5	4	k__Bacteria; p__Bacteroidetes; c__Bacteroidia; o__Bacteroidales; f__F082
OTU_3812	0	1	0	0	0	0	0	0	0	0	0	0	0	0	0	0	0	0	k__Bacteria; p__Firmicutes
OTU_7297	0	4	6	8	10	1	3	0	1	0	6	0	4	0	3	3	0	1	k__Bacteria; p__Bacteroidetes; c__Bacteroidia; o__Bacteroidales; f__Prevotellaceae; g__Prevotellaceae UCG-003; s__uncultured rumen bacterium
OTU_914	0	5	1	2	0	0	3	3	2	4	4	1	3	2	2	1	0	1	k__Bacteria; p__Firmicutes; c__Clostridia; o__Clostridiales; f__Peptococcaceae; g__Peptococcus
OTU_6867	0	2	0	0	2	0	0	0	0	0	4	1	2	2	6	2	6	10	k__Bacteria; p__Firmicutes; c__Clostridia; o__Clostridiales; f__Christensenellaceae; g__Christensenellaceae R-7 group
OTU_1195	0	1	2	3	2	1	1	3	0	0	0	0	1	0	1	1	2	2	k__Bacteria; p__Firmicutes; c__Clostridia; o__Clostridiales; f__Lachnospiraceae; g__Coprococcus 1; s__uncultured bacterium
OTU_2010	0	0	0	0	0	0	0	0	0	0	0	0	0	0	0	0	0	0	k__Bacteria; p__Actinobacteria; c__Actinobacteria; o__Bifidobacteriales; f__Bifidobacteriaceae; g__Aeriscardovia; s__uncultured bacterium
OTU_8099	0	1	0	0	0	0	0	0	0	0	0	0	1	1	1	0	3	0	k__Bacteria; p__Firmicutes; c__Clostridia; o__Clostridiales; f__Christensenellaceae; g__Christensenellaceae R-7 group
OTU_4154	0	1	0	0	0	0	0	0	1	0	0	0	0	0	0	0	0	0	k__Bacteria; p__Bacteroidetes; c__Bacteroidia; o__Bacteroidales; f__Prevotellaceae; g__Prevotella 1
OTU_574	0	2	1	12	12	8	1	6	4	3	7	7	9	5	2	3	7	8	k__Bacteria; p__Bacteroidetes; c__Bacteroidia; o__Bacteroidales; f__Prevotellaceae; g__Prevotellaceae UCG-003; s__uncultured rumen bacterium
OTU_1487	0	2	3	2	1	0	0	0	0	0	0	0	0	0	2	1	3	0	k__Bacteria; p__Bacteroidetes; c__Bacteroidia; o__Bacteroidales; f__F082; g__uncultured rumen bacterium; s__uncultured rumen bacterium
OTU_3636	0	1	0	0	0	0	0	0	0	1	0	0	0	0	1	0	0	0	k__Bacteria; p__Tenericutes; c__Mollicutes; o__Mollicutes RF39; f__uncultured rumen bacterium; g__uncultured rumen bacterium; s__uncultured rumen bacterium
OTU_2302	0	0	0	0	4	0	1	0	0	0	1	0	0	0	0	0	0	0	k__Bacteria; p__Firmicutes; c__Clostridia; o__Clostridiales; f__Ruminococcaceae; g__uncultured; s__uncultured rumen bacterium
OTU_8386	0	1	0	0	0	0	0	0	1	0	0	0	0	0	0	0	0	0	k__Bacteria; p__Firmicutes; c__Clostridia; o__Clostridiales
OTU_1114	0	1	5	5	13	4	0	3	3	7	4	0	3	5	3	3	5	6	k__Bacteria; p__Bacteroidetes; c__Bacteroidia; o__Bacteroidales; f__Prevotellaceae; g__Prevotella 1; s__uncultured rumen bacterium
OTU_879	0	0	3	6	2	7	1	2	4	0	3	3	6	1	3	2	3	2	k__Bacteria; p__Firmicutes; c__Clostridia; o__Clostridiales; f__Ruminococcaceae; g__[Eubacterium] coprostanoligenes group
OTU_9551	0	2	0	0	0	0	0	0	0	0	0	0	0	0	0	0	0	0	k__Bacteria
OTU_2954	0	2	0	0	0	0	0	0	0	0	0	0	0	0	0	0	0	0	k__Bacteria; p__Firmicutes; c__Clostridia; o__Clostridiales; f__Lachnospiraceae
OTU_3573	0	1	1	0	3	0	0	0	0	0	0	0	0	2	0	0	1	2	k__Bacteria; p__Firmicutes; c__Clostridia; o__Clostridiales; f__Lachnospiraceae; g__Butyrivibrio 2
OTU_1614	0	1	1	2	1	2	0	1	0	0	1	0	1	0	2	0	0	3	k__Bacteria; p__Actinobacteria; c__Coriobacteriia; o__Coriobacteriales; f__Atopobiaceae; g__Atopobium
OTU_4394	0	2	0	0	1	0	0	0	0	0	2	2	0	0	1	2	2	0	k__Bacteria; p__Firmicutes; c__Clostridia; o__Clostridiales; f__Ruminococcaceae; g__Ruminococcaceae UCG-014
OTU_9550	0	1	0	0	0	0	0	0	0	0	0	0	0	0	0	0	0	0	k__Bacteria
OTU_7841	0	1	0	0	0	0	0	0	0	0	0	0	0	0	0	0	0	0	k__Bacteria; p__Firmicutes; c__Clostridia; o__Clostridiales; f__Family XIII; g__[Eubacterium] nodatum group; s__uncultured rumen bacterium 3C28d-4
OTU_1660	0	2	5	0	5	0	1	0	0	0	1	0	3	0	2	1	2	2	k__Bacteria; p__Bacteroidetes; c__Bacteroidia; o__Bacteroidales; f__Prevotellaceae; g__Prevotella 1; s__uncultured rumen bacterium
OTU_4052	0	1	0	1	0	0	0	0	0	0	0	0	0	0	0	0	0	1	k__Bacteria; p__Proteobacteria; c__Alphaproteobacteria; o__Rhodospirillales; f__uncultured
OTU_3483	0	1	2	0	0	0	0	0	0	0	0	0	1	1	1	1	1	1	k__Bacteria; p__Bacteroidetes; c__Bacteroidia; o__Bacteroidales; f__Prevotellaceae
OTU_6966	0	1	0	0	0	1	0	0	0	0	1	0	0	0	0	1	0	0	k__Bacteria; p__Firmicutes; c__Clostridia; o__Clostridiales
OTU_3683	0	1	0	0	0	0	0	1	0	0	2	0	0	0	0	1	0	0	k__Bacteria; p__Firmicutes; c__Clostridia; o__Clostridiales; f__Lachnospiraceae; g__Sellimonas
OTU_9794	0	1	0	0	0	0	2	0	1	0	1	0	3	0	3	1	0	0	k__Bacteria; p__Bacteroidetes; c__Bacteroidia; o__Bacteroidales; f__Prevotellaceae
OTU_2666	0	1	0	1	0	2	0	0	0	0	0	0	0	0	0	0	0	0	k__Bacteria; p__Bacteroidetes; c__Bacteroidia; o__Bacteroidales; f__Rikenellaceae; g__Blvii28 wastewater-sludge group; s__uncultured Bacteroidetes/Chlorobi group bacterium
OTU_4076	0	0	0	0	2	0	0	0	0	0	0	0	0	0	0	0	0	0	k__Bacteria; p__Bacteroidetes; c__Bacteroidia; o__Bacteroidales; f__F082
OTU_418	0	1	3	14	15	8	3	3	8	2	14	5	20	39	2	14	28	47	k__Bacteria; p__Firmicutes; c__Clostridia; o__Clostridiales; f__Christensenellaceae; g__Christensenellaceae R-7 group
OTU_7990	0	1	0	0	0	0	0	0	0	1	0	0	0	0	0	0	0	0	k__Bacteria; p__Bacteroidetes; c__Bacteroidia; o__Bacteroidales; f__Prevotellaceae; g__Prevotella 7
OTU_1053	0	0	9	0	3	2	0	1	3	0	0	0	0	0	4	3	3	4	k__Bacteria; p__Bacteroidetes; c__Bacteroidia; o__Bacteroidales; f__Prevotellaceae; g__Prevotella 1
OTU_9871	0	1	0	0	0	0	0	0	0	0	2	0	0	0	0	0	0	0	k__Bacteria; p__Bacteroidetes; c__Bacteroidia; o__Bacteroidales
OTU_3243	0	1	0	0	0	0	0	0	0	0	0	0	0	0	0	0	0	0	k__Bacteria; p__Bacteroidetes; c__Bacteroidia; o__Bacteroidales
OTU_563	0	0	3	2	23	3	3	2	5	4	2	2	3	8	12	16	3	14	k__Bacteria; p__Bacteroidetes; c__Bacteroidia; o__Bacteroidales; f__Rikenellaceae; g__Rikenellaceae RC9 gut group; s__uncultured rumen bacterium
OTU_5154	0	0	0	0	2	0	0	0	0	0	2	0	0	7	1	0	0	0	k__Bacteria; p__Firmicutes; c__Clostridia; o__Clostridiales; f__Ruminococcaceae; g__Ruminococcaceae NK4A214 group; s__uncultured bacterium
OTU_327	0	2	7	6	26	14	2	2	21	1	11	3	26	3	10	5	10	18	k__Bacteria; p__Firmicutes; c__Erysipelotrichia; o__Erysipelotrichales; f__Erysipelotrichaceae; g__Erysipelotrichaceae UCG-009; s__uncultured rumen bacterium
OTU_11087	0	1	3	0	0	1	1	0	0	1	0	2	0	0	0	0	0	0	k__Bacteria; p__Bacteroidetes; c__Bacteroidia; o__Bacteroidales; f__Prevotellaceae; g__Prevotella 1; s__uncultured rumen bacterium
OTU_1512	0	1	1	8	3	0	1	0	0	0	0	2	3	2	1	0	0	1	k__Bacteria; p__Firmicutes; c__Clostridia; o__Clostridiales; f__Lachnospiraceae; g__Lachnospiraceae NK3A20 group; s__Lachnospiraceae bacterium KH1T2
OTU_3789	0	1	4	3	5	4	0	0	3	1	6	1	3	1	0	5	2	11	k__Bacteria; p__Firmicutes; c__Clostridia; o__Clostridiales; f__Christensenellaceae; g__Christensenellaceae R-7 group; s__uncultured rumen bacterium
OTU_480	0	1	8	11	30	14	2	6	5	1	4	0	19	0	17	6	8	0	k__Bacteria; p__Bacteroidetes; c__Bacteroidia; o__Bacteroidales; f__Prevotellaceae; g__Prevotellaceae UCG-001; s__uncultured rumen bacterium
OTU_8380	0	2	4	2	6	1	0	0	0	0	1	0	2	0	2	4	0	1	k__Bacteria; p__Firmicutes; c__Clostridia; o__Clostridiales; f__Lachnospiraceae; g__Lachnospiraceae NK3A20 group
OTU_1454	0	0	1	3	0	2	0	0	0	0	4	3	0	0	1	0	0	0	k__Bacteria; p__Firmicutes; c__Clostridia; o__Clostridiales; f__Lachnospiraceae; g__Lachnospiraceae UCG-008; s__uncultured rumen bacterium
OTU_8138	0	2	0	0	0	0	0	0	0	0	0	0	0	0	0	0	0	0	k__Bacteria; p__Firmicutes; c__Clostridia; o__Clostridiales; f__Lachnospiraceae
OTU_484	0	1	7	4	13	11	2	1	0	1	16	3	2	42	8	6	9	19	k__Bacteria; p__Firmicutes; c__Clostridia; o__Clostridiales; f__Ruminococcaceae; g__[Eubacterium] coprostanoligenes group; s__uncultured rumen bacterium
OTU_7489	0	2	0	0	0	0	0	0	0	1	0	0	0	0	0	0	0	0	k__Bacteria; p__Firmicutes; c__Clostridia; o__Clostridiales; f__Ruminococcaceae; g__Ruminococcaceae UCG-014
OTU_6881	0	0	0	0	0	0	0	0	0	0	0	0	0	0	1	0	0	0	k__Bacteria; p__Firmicutes; c__Clostridia; o__Clostridiales; f__Defluviitaleaceae; g__Defluviitaleaceae UCG-011
OTU_5780	0	1	0	0	0	0	0	0	0	0	0	0	0	1	1	0	0	0	k__Bacteria; p__Bacteroidetes; c__Bacteroidia; o__Bacteroidales; f__Rikenellaceae; g__Rikenellaceae RC9 gut group; s__uncultured rumen bacterium
OTU_2457	0	1	1	2	2	1	1	0	13	0	2	0	1	2	1	4	13	20	k__Bacteria; p__Firmicutes; c__Clostridia; o__Clostridiales; f__Lachnospiraceae
OTU_10580	0	1	0	0	0	0	0	0	0	0	0	0	0	1	0	0	0	1	k__Bacteria; p__Firmicutes; c__Clostridia; o__Clostridiales; f__Lachnospiraceae
OTU_1057	0	1	1	0	2	0	6	2	0	2	3	2	4	0	1	8	0	0	k__Bacteria; p__Firmicutes; c__Clostridia; o__Clostridiales; f__Lachnospiraceae; g__uncultured; s__uncultured rumen bacterium
OTU_3397	0	2	0	0	0	0	1	0	1	0	0	0	0	3	2	0	0	0	k__Bacteria; p__Firmicutes; c__Clostridia; o__Clostridiales; f__Lachnospiraceae
OTU_4078	0	3	0	1	0	0	0	0	0	0	0	0	0	0	0	0	0	0	k__Bacteria; p__Firmicutes; c__Clostridia; o__Clostridiales; f__Lachnospiraceae
OTU_345	0	0	0	0	0	0	2	0	0	0	0	0	1	1	0	0	0	0	k__Bacteria; p__Firmicutes; c__Clostridia; o__Clostridiales; f__Ruminococcaceae
OTU_1431	0	1	1	2	2	1	1	0	1	0	0	0	0	0	0	0	0	4	k__Bacteria; p__Firmicutes; c__Clostridia; o__Clostridiales; f__Lachnospiraceae; g__Acetitomaculum; s__uncultured rumen bacterium
OTU_4287	0	1	0	2	1	1	0	2	0	0	0	0	0	0	0	0	1	0	k__Bacteria; p__Bacteroidetes; c__Bacteroidia; o__Bacteroidales; f__Prevotellaceae; g__Prevotella 1; s__uncultured rumen bacterium
OTU_2756	0	0	0	0	0	0	0	0	0	0	0	0	0	1	0	0	0	0	k__Bacteria
OTU_1816	0	1	0	0	1	0	0	0	3	0	0	0	0	0	0	0	1	1	k__Bacteria; p__Firmicutes; c__Clostridia; o__Clostridiales; f__Ruminococcaceae; g__Ruminiclostridium; s__uncultured rumen bacterium
OTU_820	0	1	0	4	7	1	5	0	0	1	2	0	0	1	3	2	0	0	k__Bacteria; p__Firmicutes; c__Clostridia; o__Clostridiales; f__Lachnospiraceae; g__Acetitomaculum
OTU_10318	0	2	0	0	0	0	0	2	0	0	0	0	0	0	0	0	0	0	k__Bacteria; p__Firmicutes; c__Clostridia; o__Clostridiales; f__Lachnospiraceae
OTU_1353	0	1	0	5	0	0	2	1	0	0	1	0	0	1	0	3	0	0	k__Bacteria; p__Bacteroidetes; c__Bacteroidia; o__Bacteroidales; f__Rikenellaceae; g__Rikenellaceae RC9 gut group; s__uncultured rumen bacterium
OTU_6578	0	1	0	0	0	0	0	0	0	0	0	0	0	0	0	0	0	0	k__Bacteria; p__Firmicutes; c__Clostridia; o__Clostridiales; f__Ruminococcaceae
OTU_10106	0	0	1	0	0	0	0	0	0	4	0	0	0	0	1	0	0	0	k__Bacteria; p__Bacteroidetes; c__Bacteroidia; o__Bacteroidales; f__Prevotellaceae
OTU_2904	0	0	0	0	0	0	0	0	0	0	0	0	0	1	1	0	0	0	k__Bacteria; p__Bacteroidetes; c__Bacteroidia; o__Bacteroidales; f__Prevotellaceae; g__Prevotella 1
OTU_1710	0	1	1	2	3	1	0	3	3	1	0	0	0	3	6	0	20	27	k__Bacteria; p__Firmicutes; c__Clostridia; o__Clostridiales; f__Lachnospiraceae
OTU_3181	0	3	0	0	0	0	0	0	1	0	0	1	0	0	0	0	0	0	k__Bacteria; p__Firmicutes; c__Clostridia; o__Clostridiales; f__Ruminococcaceae
OTU_3833	0	3	1	0	0	2	0	0	1	1	6	0	0	9	3	2	5	6	k__Bacteria; p__Firmicutes; c__Clostridia; o__Clostridiales; f__Lachnospiraceae; g__[Ruminococcus] gauvreauii group; s__uncultured rumen bacterium
OTU_5835	0	3	0	6	3	0	1	0	9	1	0	3	1	0	0	3	4	2	k__Bacteria; p__Actinobacteria; c__Coriobacteriia; o__Coriobacteriales; f__Atopobiaceae; g__Olsenella
OTU_2726	0	0	0	0	0	1	0	0	0	0	1	1	0	4	1	0	0	0	k__Bacteria; p__Bacteroidetes; c__Bacteroidia; o__Bacteroidales; f__Prevotellaceae; g__Prevotella 1; s__uncultured rumen bacterium
OTU_3215	0	0	0	0	3	1	0	0	0	0	2	1	0	0	0	1	2	2	k__Bacteria; p__Tenericutes; c__Mollicutes; o__Mollicutes RF39
OTU_1721	0	1	0	1	6	2	0	0	3	0	2	0	0	1	2	1	1	1	k__Bacteria; p__Bacteroidetes; c__Bacteroidia; o__Bacteroidales; f__Prevotellaceae; g__Prevotellaceae UCG-003
OTU_3759	0	1	0	0	1	0	0	0	1	1	2	1	0	0	2	1	1	0	k__Bacteria; p__Firmicutes; c__Clostridia; o__Clostridiales; f__Lachnospiraceae; g__Acetitomaculum; s__uncultured rumen bacterium
OTU_7700	0	0	0	0	0	0	0	0	0	0	0	0	0	0	0	0	0	0	k__Bacteria; p__Firmicutes; c__Clostridia; o__Clostridiales; f__Ruminococcaceae; g__Ruminococcus 2
OTU_4	0	0	0	0	3	0	0	0	0	0	1	0	0	1	1	1	0	1	k__Bacteria; p__Firmicutes; c__Clostridia; o__Clostridiales; f__Peptostreptococcaceae; g__Paeniclostridium
OTU_986	0	3	1	0	8	2	2	2	1	0	3	0	0	0	1	3	5	4	k__Bacteria; p__Tenericutes; c__Mollicutes; o__Mycoplasmatales; f__Mycoplasmataceae; g__Mycoplasma; s__uncultured rumen bacterium
OTU_5767	0	1	0	0	0	0	0	0	0	0	0	0	0	0	0	0	0	0	k__Bacteria; p__Firmicutes; c__Clostridia; o__Clostridiales
OTU_336	0	0	9	13	24	3	1	5	1	0	16	8	11	8	3	8	16	8	k__Bacteria; p__Firmicutes; c__Clostridia; o__Clostridiales
OTU_5242	0	1	0	0	0	0	0	0	0	0	0	0	1	0	0	0	1	0	k__Bacteria; p__Firmicutes; c__Clostridia; o__Clostridiales; f__Ruminococcaceae; g__Ruminococcaceae NK4A214 group; s__metagenome
OTU_10024	0	2	2	1	0	1	0	2	0	4	0	4	0	0	3	2	0	0	k__Bacteria; p__Bacteroidetes; c__Bacteroidia; o__Bacteroidales
OTU_6921	0	2	0	0	0	0	1	3	0	1	0	0	0	0	0	0	0	0	k__Bacteria; p__Firmicutes; c__Clostridia; o__Clostridiales; f__Lachnospiraceae
OTU_1100	0	0	0	4	1	1	0	0	2	5	0	2	1	0	2	1	1	3	k__Bacteria; p__Tenericutes; c__Mollicutes; o__Mollicutes RF39
OTU_10006	0	0	0	0	0	0	1	0	2	1	0	0	0	0	1	0	0	0	k__Bacteria; p__Firmicutes; c__Clostridia; o__Clostridiales; f__Lachnospiraceae
OTU_1970	0	0	1	0	1	0	0	0	0	0	0	0	0	0	1	0	0	0	k__Bacteria; p__Bacteroidetes; c__Bacteroidia; o__Bacteroidales; f__Bacteroidaceae; g__Bacteroides
OTU_10249	0	1	0	0	0	0	0	0	0	0	0	0	0	0	0	0	1	0	k__Bacteria; p__Firmicutes; c__Clostridia; o__Clostridiales; f__Ruminococcaceae; g__Ruminococcaceae NK4A214 group
OTU_2514	0	2	0	0	0	0	0	0	0	0	0	0	1	0	0	0	0	0	k__Bacteria; p__Proteobacteria; c__Deltaproteobacteria; o__Desulfobacterales; f__Desulfobulbaceae; g__Desulfobulbus
OTU_2220	0	2	1	0	1	0	0	0	0	1	0	0	0	0	0	0	0	0	k__Bacteria; p__Cyanobacteria; c__Melainabacteria; o__Gastranaerophilales; f__uncultured bacterium; g__uncultured bacterium; s__uncultured bacterium
OTU_3275	0	1	0	0	0	0	0	0	0	0	0	0	0	0	0	0	0	0	k__Bacteria; p__Firmicutes; c__Clostridia; o__Clostridiales
OTU_1702	0	1	0	3	0	6	0	0	0	0	0	5	3	1	0	0	0	0	k__Bacteria; p__Firmicutes; c__Clostridia; o__Clostridiales; f__Lachnospiraceae; g__Lachnospiraceae NC2004 group
OTU_7873	0	0	0	1	0	0	0	1	0	0	0	0	0	0	0	0	0	0	k__Bacteria; p__Firmicutes; c__Clostridia; o__Clostridiales; f__Lachnospiraceae; g__uncultured; s__Lachnospiraceae bacterium CG55
OTU_517	0	3	3	4	11	6	0	0	1	1	4	0	2	2	3	1	2	17	k__Bacteria; p__Bacteroidetes; c__Bacteroidia; o__Bacteroidales; f__Rikenellaceae; g__Rikenellaceae RC9 gut group
OTU_578	0	0	6	23	3	2	0	0	2	1	9	1	1	0	30	4	7	2	k__Bacteria; p__Bacteroidetes; c__Bacteroidia; o__Bacteroidales; f__p-251-o5; g__uncultured rumen bacterium; s__uncultured rumen bacterium
OTU_8167	0	1	0	0	0	0	0	0	0	0	0	0	0	0	0	0	0	0	k__Bacteria; p__Firmicutes; c__Clostridia; o__Clostridiales; f__Lachnospiraceae
OTU_7833	0	1	0	3	0	0	0	0	1	0	2	0	1	4	2	3	5	5	k__Bacteria; p__Firmicutes; c__Clostridia; o__Clostridiales; f__Ruminococcaceae; g__Ruminococcaceae NK4A214 group; s__uncultured bacterium
OTU_916	0	1	2	6	2	4	4	3	6	1	7	1	2	1	2	1	1	5	k__Bacteria; p__Firmicutes; c__Clostridia; o__Clostridiales; f__Lachnospiraceae; g__Lachnospiraceae UCG-008
OTU_7603	0	1	0	0	0	0	0	0	0	0	0	0	0	0	0	0	0	0	k__Bacteria; p__Firmicutes; c__Clostridia; o__Clostridiales; f__Lachnospiraceae
OTU_9782	0	2	0	0	2	0	0	0	1	0	1	0	1	0	0	0	0	1	k__Bacteria; p__Firmicutes; c__Clostridia; o__Clostridiales; f__Ruminococcaceae
OTU_737	0	2	2	2	4	2	0	4	7	1	3	0	1	3	1	8	8	9	k__Bacteria; p__Firmicutes; c__Clostridia; o__Clostridiales; f__Lachnospiraceae; g__[Eubacterium] hallii group; s__uncultured bacterium
OTU_1067	0	0	1	1	1	3	3	1	6	2	1	0	0	1	0	1	0	4	k__Bacteria; p__Bacteroidetes; c__Bacteroidia; o__Bacteroidales; f__F082; g__uncultured rumen bacterium; s__uncultured rumen bacterium
OTU_1340	0	0	0	0	0	4	4	0	0	0	0	0	0	0	0	2	0	4	k__Bacteria; p__Bacteroidetes; c__Bacteroidia; o__Bacteroidales; f__Rikenellaceae; g__Rikenellaceae RC9 gut group
OTU_1858	0	0	0	0	0	0	1	0	1	0	0	0	0	0	2	0	0	0	k__Bacteria; p__Bacteroidetes; c__Bacteroidia; o__Bacteroidales; f__Muribaculaceae; g__uncultured bacterium; s__uncultured bacterium
OTU_1192	0	1	3	3	6	10	2	0	0	0	4	1	3	3	2	4	7	1	k__Bacteria; p__Bacteroidetes; c__Bacteroidia; o__Bacteroidales; f__Prevotellaceae; g__Prevotella 1
OTU_1585	0	0	3	1	6	0	0	2	0	2	1	0	1	0	0	0	1	1	k__Bacteria; p__Firmicutes; c__Clostridia; o__Clostridiales; f__Ruminococcaceae; g__[Eubacterium] coprostanoligenes group; s__uncultured rumen bacterium
OTU_7008	0	1	0	0	0	2	0	0	0	0	0	0	0	0	0	0	0	0	k__Bacteria; p__Firmicutes; c__Clostridia; o__Clostridiales; f__Lachnospiraceae; g__Butyrivibrio 2
OTU_1003	0	2	1	3	0	5	2	2	0	6	2	2	1	8	5	8	0	2	k__Bacteria; p__Bacteroidetes; c__Bacteroidia; o__Bacteroidales; f__Prevotellaceae; g__Prevotella 1
OTU_5160	0	2	0	1	0	3	1	2	1	2	0	2	0	7	0	0	3	0	k__Bacteria; p__Firmicutes; c__Clostridia; o__Clostridiales
OTU_10443	0	2	0	0	0	1	0	0	1	0	1	0	2	0	0	0	0	1	k__Bacteria; p__Firmicutes; c__Clostridia; o__Clostridiales; f__Lachnospiraceae; g__Lachnospiraceae NK3A20 group
OTU_1722	0	1	0	4	0	1	0	0	0	0	1	2	0	1	0	0	0	0	k__Bacteria; p__Firmicutes; c__Clostridia; o__Clostridiales; f__Lachnospiraceae; g__Anaerosporobacter; s__uncultured bacterium
OTU_8135	0	2	0	0	0	2	0	0	0	0	0	0	0	0	1	0	0	0	k__Bacteria; p__Firmicutes
OTU_6797	0	2	0	0	0	0	0	0	0	0	0	0	1	0	0	0	0	0	k__Bacteria; p__Firmicutes; c__Clostridia; o__Clostridiales; f__Lachnospiraceae; g__Acetitomaculum
OTU_6925	0	2	0	0	0	0	0	0	0	2	0	0	0	0	0	1	0	1	k__Bacteria; p__Firmicutes; c__Clostridia; o__Clostridiales; f__Lachnospiraceae
OTU_1852	0	1	1	2	2	1	2	0	0	0	0	0	1	0	0	1	0	0	k__Bacteria; p__Firmicutes; c__Clostridia; o__Clostridiales; f__Ruminococcaceae
OTU_9673	0	2	0	0	0	0	0	0	0	0	0	0	0	0	0	0	0	0	k__Bacteria; p__Firmicutes; c__Clostridia; o__Clostridiales; f__Lachnospiraceae; g__Lachnospiraceae NK3A20 group
OTU_10314	0	2	0	0	0	0	0	0	0	1	1	0	0	0	0	0	0	0	k__Bacteria; p__Patescibacteria; c__Gracilibacteria; o__Absconditabacteriales (SR1)
OTU_71	0	0	31	39	67	56	18	25	119	20	67	42	126	99	32	38	94	75	k__Bacteria; p__Firmicutes; c__Clostridia; o__Clostridiales; f__Christensenellaceae; g__Christensenellaceae R-7 group
OTU_10301	0	1	0	0	0	0	0	0	0	0	0	0	0	0	0	0	0	0	k__Bacteria; p__Firmicutes; c__Clostridia; o__Clostridiales; f__Lachnospiraceae; g__Butyrivibrio 2
OTU_6379	0	1	0	1	1	1	0	0	6	1	0	0	0	0	2	1	6	6	k__Bacteria; p__Firmicutes; c__Clostridia; o__Clostridiales; f__Lachnospiraceae
OTU_1157	0	1	1	0	0	2	0	0	2	0	3	0	1	0	1	1	6	4	k__Bacteria; p__Firmicutes; c__Clostridia; o__Clostridiales; f__Lachnospiraceae; g__[Eubacterium] hallii group; s__uncultured rumen bacterium
OTU_1750	0	1	0	0	0	0	0	0	0	0	0	0	0	0	0	0	0	1	k__Bacteria; p__Firmicutes; c__Clostridia; o__Clostridiales; f__Lachnospiraceae
OTU_7116	0	1	0	0	0	0	0	0	0	0	0	2	0	0	0	0	0	0	k__Bacteria; p__Firmicutes; c__Clostridia; o__Clostridiales; f__Lachnospiraceae
OTU_3318	0	0	1	1	3	20	2	2	0	3	4	18	2	15	5	5	5	0	k__Bacteria; p__Bacteroidetes; c__Bacteroidia; o__Bacteroidales; f__Prevotellaceae; g__Prevotella 7
OTU_2199	0	1	0	0	0	0	0	1	0	1	0	0	3	1	0	1	0	0	k__Bacteria; p__Firmicutes; c__Clostridia; o__Clostridiales; f__Defluviitaleaceae; g__Defluviitaleaceae UCG-011; s__uncultured bacterium
OTU_8405	0	2	0	0	0	0	0	0	0	0	0	0	0	0	0	0	0	0	k__Bacteria; p__Firmicutes; c__Clostridia; o__Clostridiales; f__Ruminococcaceae; g__Ruminococcus 1; s__uncultured bacterium Contigcl_1787
OTU_982	0	1	1	4	1	0	0	0	6	0	0	1	1	0	5	1	2	0	k__Bacteria; p__Cyanobacteria; c__Oxyphotobacteria; o__Synechococcales; f__Cyanobiaceae; g__Synechococcus CC9902; s__uncultured bacterium
OTU_187	0	1	19	25	29	24	3	4	33	1	34	8	20	23	20	27	48	40	k__Bacteria; p__Firmicutes; c__Clostridia; o__Clostridiales; f__Lachnospiraceae; g__[Ruminococcus] gauvreauii group; s__uncultured bacterium
OTU_2312	0	1	0	0	0	1	1	0	0	1	0	0	0	0	0	0	0	0	k__Bacteria; p__Firmicutes; c__Clostridia; o__Clostridiales; f__Christensenellaceae; g__Christensenellaceae R-7 group
OTU_3774	0	2	0	0	1	0	0	0	1	0	0	1	0	0	0	0	1	2	k__Bacteria; p__Firmicutes; c__Clostridia; o__Clostridiales; f__Lachnospiraceae
OTU_3842	0	0	0	0	0	1	0	0	0	1	1	1	0	0	0	0	0	0	k__Bacteria; p__Firmicutes
OTU_5826	0	1	1	0	0	0	1	0	1	0	1	0	1	0	2	0	0	2	k__Bacteria; p__Bacteroidetes; c__Bacteroidia; o__Bacteroidales; f__F082
OTU_2682	0	2	7	3	6	3	3	4	6	2	5	5	5	17	4	9	12	14	k__Bacteria; p__Firmicutes; c__Clostridia; o__Clostridiales; f__Ruminococcaceae; g__Ruminococcaceae UCG-014
OTU_9264	0	1	0	0	0	3	0	0	0	0	0	1	0	0	0	0	0	0	k__Bacteria; p__Bacteroidetes; c__Bacteroidia; o__Bacteroidales; f__Prevotellaceae; g__Prevotella 9; s__uncultured rumen bacterium
OTU_1738	0	1	0	0	0	0	0	0	0	0	0	1	1	0	0	1	0	2	k__Bacteria; p__Bacteroidetes; c__Bacteroidia; o__Bacteroidales; f__Tannerellaceae; g__Parabacteroides
OTU_7144	0	1	0	1	0	0	0	0	0	1	0	0	0	0	0	0	0	0	k__Bacteria; p__Bacteroidetes; c__Bacteroidia; o__Bacteroidales; f__Prevotellaceae; g__Prevotella 1; s__uncultured rumen bacterium
OTU_1778	0	1	1	0	0	0	0	0	0	0	0	0	0	0	0	0	0	0	k__Bacteria; p__Proteobacteria; c__Alphaproteobacteria; o__Rickettsiales; f__Mitochondria; g__uncultured rumen bacterium; s__uncultured rumen bacterium
OTU_1647	0	1	4	5	3	3	0	2	2	1	2	1	2	1	0	0	2	6	k__Bacteria; p__Actinobacteria; c__Coriobacteriia; o__Coriobacteriales; f__Atopobiaceae; g__Atopobium
OTU_11102	0	1	0	0	0	0	0	0	0	0	0	0	0	0	0	0	0	0	k__Bacteria; p__Bacteroidetes; c__Bacteroidia; o__Bacteroidales; f__Prevotellaceae
OTU_2470	0	1	0	0	1	0	0	0	0	0	0	1	0	0	0	0	0	0	k__Bacteria; p__Tenericutes; c__Mollicutes; o__Mollicutes RF39; f__uncultured bacterium; g__uncultured bacterium; s__uncultured bacterium
OTU_11132	0	0	1	0	0	1	2	0	0	0	0	3	2	0	1	0	1	0	k__Bacteria; p__Bacteroidetes; c__Bacteroidia; o__Bacteroidales; f__Prevotellaceae; g__Prevotella 1
OTU_1604	0	1	0	0	0	0	0	0	0	1	0	1	1	1	1	0	1	0	k__Bacteria; p__Firmicutes; c__Erysipelotrichia; o__Erysipelotrichales; f__Erysipelotrichaceae; g__uncultured; s__uncultured rumen bacterium
OTU_718	0	0	0	0	0	0	0	0	0	0	0	0	0	0	0	1	0	0	k__Bacteria; p__Firmicutes; c__Clostridia; o__Clostridiales; f__Ruminococcaceae
OTU_3203	0	0	0	0	0	0	0	0	1	0	0	0	0	0	0	0	0	0	k__Bacteria; p__Spirochaetes; c__Spirochaetia; o__Spirochaetales; f__Spirochaetaceae; g__Sphaerochaeta
OTU_1437	0	0	0	0	4	0	0	1	0	0	0	0	1	0	0	2	3	2	k__Bacteria; p__Firmicutes; c__Clostridia; o__Clostridiales; f__Lachnospiraceae; g__Moryella
OTU_837	0	2	1	0	5	5	0	0	0	0	0	0	2	3	1	0	1	5	k__Bacteria; p__Bacteroidetes; c__Bacteroidia; o__Bacteroidales; f__F082; g__uncultured rumen bacterium; s__uncultured rumen bacterium
OTU_2174	0	2	1	0	0	3	0	0	0	0	0	0	0	0	0	0	1	0	k__Bacteria; p__Firmicutes; c__Clostridia; o__Clostridiales; f__Ruminococcaceae; g__Candidatus Soleaferrea; s__uncultured rumen bacterium
OTU_2554	0	2	0	0	0	0	0	1	0	0	0	0	0	0	0	0	0	0	k__Bacteria; p__Actinobacteria; c__Actinobacteria; o__Micrococcales; f__Micrococcaceae; g__Glutamicibacter
OTU_3872	0	0	0	0	0	0	0	0	0	0	0	0	0	0	0	0	0	0	k__Bacteria; p__Firmicutes; c__Clostridia; o__Clostridiales; f__Ruminococcaceae; g__Faecalibacterium; s__uncultured bacterium
OTU_1143	0	2	0	1	0	0	0	1	0	0	0	0	0	0	0	0	0	0	k__Bacteria; p__Firmicutes; c__Clostridia; o__Clostridiales; f__Ruminococcaceae; g__uncultured; s__uncultured rumen bacterium 4C0d-17
OTU_3988	0	1	0	1	0	0	0	0	0	0	0	0	0	0	0	0	0	0	k__Bacteria; p__Firmicutes; c__Clostridia; o__Clostridiales; f__Family XIII; g__[Eubacterium] nodatum group; s__uncultured rumen bacterium
OTU_717	0	1	12	10	13	16	21	2	1	7	10	2	11	6	9	7	12	0	k__Bacteria; p__Bacteroidetes; c__Bacteroidia; o__Bacteroidales; f__Prevotellaceae
OTU_266	0	0	6	9	20	3	2	3	0	1	2	0	3	7	17	9	9	13	k__Bacteria; p__Firmicutes; c__Clostridia; o__Clostridiales; f__Ruminococcaceae; g__Ruminococcaceae UCG-014; s__uncultured rumen bacterium
OTU_10500	0	1	0	0	0	0	0	0	2	0	0	0	0	0	0	0	1	0	k__Bacteria; p__Firmicutes; c__Clostridia; o__Clostridiales; f__Ruminococcaceae; g__Ruminococcaceae NK4A214 group
OTU_1926	0	1	3	1	2	2	1	0	0	0	1	0	0	0	0	0	0	0	k__Bacteria; p__Bacteroidetes; c__Bacteroidia; o__Bacteroidales; f__Prevotellaceae; g__Prevotellaceae UCG-003; s__uncultured rumen bacterium
OTU_3282	0	2	0	0	0	0	0	0	2	1	0	0	0	0	0	0	0	0	k__Bacteria; p__Firmicutes; c__Bacilli; o__Lactobacillales; f__Streptococcaceae; g__Lactococcus; s__Lactococcus lactis
OTU_6595	0	0	0	0	0	1	0	0	0	2	0	1	0	0	0	0	0	0	k__Bacteria; p__Firmicutes; c__Clostridia; o__Clostridiales; f__Ruminococcaceae; g__Ruminococcus 1
OTU_1658	0	2	0	2	0	2	0	0	1	1	0	1	2	0	0	0	0	1	k__Bacteria; p__Firmicutes; c__Clostridia; o__Clostridiales; f__Lachnospiraceae; g__Butyrivibrio 2; s__uncultured rumen bacterium
OTU_3135	0	4	8	2	19	6	3	5	3	6	15	0	14	50	10	19	22	27	k__Bacteria; p__Firmicutes; c__Clostridia; o__Clostridiales; f__Ruminococcaceae; g__Ruminococcaceae NK4A214 group
OTU_4374	0	0	0	0	0	2	0	1	0	0	0	0	0	0	0	0	2	0	k__Bacteria; p__Firmicutes; c__Negativicutes; o__Selenomonadales
OTU_1938	0	1	0	2	0	0	0	0	0	0	0	0	0	0	0	0	0	3	k__Bacteria; p__Bacteroidetes; c__Bacteroidia; o__Bacteroidales; f__F082
OTU_1159	0	0	3	1	1	0	0	3	0	0	0	0	0	4	1	2	1	2	k__Bacteria; p__Bacteroidetes; c__Bacteroidia; o__Bacteroidales; f__Bacteroidaceae; g__Bacteroides
OTU_1984	0	1	2	0	1	1	0	1	3	1	0	0	0	0	1	1	0	1	k__Bacteria; p__Tenericutes; c__Mollicutes; o__Mollicutes RF39; f__uncultured bacterium; g__uncultured bacterium; s__uncultured bacterium
OTU_2789	0	0	0	0	1	0	0	0	0	2	0	0	0	1	0	0	0	0	k__Bacteria; p__Firmicutes; c__Clostridia; o__Clostridiales; f__Lachnospiraceae
OTU_2251	0	1	0	0	0	0	0	0	0	0	0	0	0	0	0	0	0	0	k__Bacteria; p__Proteobacteria; c__Gammaproteobacteria; o__Betaproteobacteriales; f__Hydrogenophilaceae; g__Hydrogenophilus; s__uncultured bacterium
OTU_54	0	1	0	4	0	0	1	0	0	2	0	0	6	0	0	0	0	10	k__Bacteria; p__Actinobacteria; c__Actinobacteria; o__Bifidobacteriales; f__Bifidobacteriaceae; g__Bifidobacterium; s__uncultured bacterium
OTU_1931	0	1	0	1	0	0	0	0	0	0	0	1	0	0	0	0	0	0	k__Bacteria; p__Firmicutes; c__Erysipelotrichia; o__Erysipelotrichales; f__Erysipelotrichaceae; g__Erysipelotrichaceae UCG-004; s__gut metagenome
OTU_10349	0	0	0	0	0	0	1	0	0	0	0	0	1	0	0	0	0	0	k__Bacteria; p__Firmicutes; c__Clostridia; o__Clostridiales; f__Lachnospiraceae
OTU_8203	0	1	0	0	0	0	0	0	0	0	0	0	0	1	0	0	0	0	k__Bacteria; p__Firmicutes; c__Clostridia; o__Clostridiales; f__Ruminococcaceae; g__Ruminococcaceae UCG-004
OTU_3121	0	0	0	0	0	0	0	0	0	0	0	2	0	0	0	0	0	0	k__Bacteria
OTU_9640	0	0	0	0	8	1	1	0	3	0	1	1	6	7	4	9	8	18	k__Bacteria; p__Firmicutes; c__Clostridia; o__Clostridiales; f__Ruminococcaceae; g__Ruminococcaceae NK4A214 group
OTU_10300	0	1	0	0	0	0	0	0	0	0	0	0	0	0	0	0	0	0	k__Bacteria; p__Bacteroidetes; c__Bacteroidia; o__Bacteroidales; f__Prevotellaceae
OTU_7111	0	1	0	0	0	0	0	0	0	2	0	0	0	0	0	0	0	0	k__Bacteria; p__Firmicutes; c__Clostridia; o__Clostridiales; f__Lachnospiraceae; g__Lachnoclostridium 1; s__bacterium enrichment culture clone R1-3
OTU_5193	0	2	0	0	0	1	0	0	0	0	0	0	1	3	0	0	1	0	k__Bacteria; p__Firmicutes; c__Clostridia; o__Clostridiales; f__Lachnospiraceae
OTU_1681	0	0	0	0	0	1	0	0	0	0	0	4	2	0	0	0	3	0	k__Bacteria; p__Firmicutes; c__Clostridia; o__Clostridiales; f__Ruminococcaceae; g__Ruminococcaceae UCG-010
OTU_657	0	1	0	0	0	0	1	0	0	0	0	0	0	0	0	0	0	0	k__Bacteria; p__Bacteroidetes; c__Bacteroidia; o__Bacteroidales; f__Prevotellaceae; g__Prevotellaceae UCG-003
OTU_1917	0	0	0	0	0	0	0	2	0	0	0	0	0	0	0	2	0	0	k__Bacteria; p__Firmicutes; c__Clostridia; o__Clostridiales; f__Family XIII; g__Mogibacterium; s__uncultured bacterium
OTU_10552	0	1	1	0	0	0	2	0	0	4	2	1	3	6	2	2	0	0	k__Bacteria; p__Bacteroidetes; c__Bacteroidia; o__Bacteroidales; f__Prevotellaceae
OTU_690	0	1	2	2	2	10	5	4	1	1	5	0	2	2	2	1	3	4	k__Bacteria; p__Firmicutes; c__Erysipelotrichia; o__Erysipelotrichales; f__Erysipelotrichaceae; g__Erysipelotrichaceae UCG-004
OTU_822	0	1	27	8	7	18	0	6	1	1	13	1	11	18	1	7	2	7	k__Bacteria; p__Bacteroidetes; c__Bacteroidia; o__Bacteroidales; f__Prevotellaceae
OTU_5683	0	0	0	0	0	1	0	0	0	0	0	0	0	0	0	1	0	2	k__Bacteria; p__Firmicutes; c__Clostridia; o__Clostridiales
OTU_10968	0	1	0	0	0	0	0	0	0	0	0	0	2	0	0	0	0	0	k__Bacteria; p__Firmicutes; c__Clostridia; o__Clostridiales; f__Ruminococcaceae; g__Ruminococcaceae UCG-014
OTU_2351	0	1	0	0	1	0	0	0	0	0	0	0	0	0	0	0	0	1	k__Bacteria; p__Firmicutes; c__Clostridia; o__Clostridiales; f__Ruminococcaceae; g__Ruminococcaceae UCG-010; s__uncultured bacterium
OTU_6924	0	1	0	0	0	0	0	0	0	0	0	0	0	0	0	0	0	0	k__Bacteria; p__Fibrobacteres; c__Fibrobacteria; o__Fibrobacterales; f__Fibrobacteraceae; g__Fibrobacter; s__Fibrobacter sp. UWH4
OTU_3108	0	2	0	5	0	0	5	0	0	0	1	0	0	1	0	0	0	0	k__Bacteria; p__Firmicutes; c__Clostridia; o__Clostridiales; f__Ruminococcaceae; g__Ruminococcaceae UCG-014
OTU_247	0	0	0	0	0	0	0	1	0	0	0	0	0	0	0	0	0	0	k__Bacteria; p__Firmicutes; c__Clostridia; o__Clostridiales; f__Ruminococcaceae; g__Ruminococcaceae UCG-010
OTU_703	0	1	4	1	0	2	1	0	0	0	1	1	0	0	1	0	1	0	k__Bacteria; p__Tenericutes; c__Mollicutes; o__Mollicutes RF39
OTU_5727	0	1	0	0	0	0	0	1	0	0	0	0	1	1	0	1	0	1	k__Bacteria; p__Firmicutes; c__Clostridia; o__Clostridiales; f__Ruminococcaceae; g__Ruminococcaceae UCG-014
OTU_2490	0	1	0	0	0	1	0	0	0	1	0	0	0	2	0	0	0	0	k__Bacteria; p__Firmicutes; c__Clostridia; o__Clostridiales; f__Ruminococcaceae
OTU_1004	0	1	1	5	0	5	0	0	3	0	2	1	2	0	1	2	0	0	k__Bacteria; p__Bacteroidetes; c__Bacteroidia; o__Bacteroidales; f__F082
OTU_1835	0	1	5	1	2	0	1	1	0	2	0	0	5	0	3	4	2	3	k__Bacteria; p__Bacteroidetes; c__Bacteroidia; o__Bacteroidales; f__Prevotellaceae; g__Prevotellaceae UCG-001; s__uncultured rumen bacterium
OTU_10063	0	1	1	0	0	0	2	0	0	0	0	0	0	2	0	0	2	2	k__Bacteria; p__Firmicutes; c__Clostridia; o__Clostridiales; f__Lachnospiraceae
OTU_8213	0	0	0	0	0	0	0	0	0	0	0	0	0	2	0	0	0	0	k__Bacteria; p__Bacteroidetes; c__Bacteroidia; o__Bacteroidales; f__Prevotellaceae
OTU_3171	0	2	3	4	3	2	0	0	3	2	2	0	2	1	2	1	0	2	k__Bacteria; p__Bacteroidetes; c__Bacteroidia; o__Bacteroidales; f__Prevotellaceae; g__Prevotella 1; s__uncultured rumen bacterium
OTU_9498	0	1	0	0	0	0	0	0	0	0	0	0	0	0	0	0	0	0	k__Bacteria; p__Firmicutes; c__Clostridia; o__Clostridiales; f__Lachnospiraceae
OTU_826	0	2	0	0	0	8	0	2	5	0	2	2	5	0	0	2	3	5	k__Bacteria; p__Bacteroidetes; c__Bacteroidia; o__Bacteroidales; f__p-2534-18B5 gut group; g__uncultured bacterium; s__uncultured bacterium
OTU_8499	0	1	0	0	0	0	0	0	0	0	1	0	1	0	0	0	0	0	k__Bacteria; p__Firmicutes; c__Clostridia; o__Clostridiales
OTU_7558	0	1	0	0	0	0	0	0	0	0	0	0	0	0	0	0	0	0	k__Bacteria; p__Firmicutes; c__Erysipelotrichia; o__Erysipelotrichales; f__Erysipelotrichaceae; g__Solobacterium; s__uncultured rumen bacterium
OTU_10294	0	2	0	0	0	0	0	0	0	0	0	0	0	0	0	0	0	0	k__Bacteria; p__Bacteroidetes; c__Bacteroidia; o__Bacteroidales
OTU_1255	0	0	2	1	1	0	0	0	1	3	0	1	1	0	0	1	0	1	k__Bacteria; p__Firmicutes; c__Clostridia; o__Clostridiales; f__Lachnospiraceae; g__Lachnospiraceae ND3007 group; s__uncultured rumen bacterium
OTU_5731	0	1	1	0	1	0	1	0	2	0	0	1	1	0	1	3	0	1	k__Bacteria; p__Actinobacteria; c__Coriobacteriia; o__Coriobacteriales; f__Atopobiaceae; g__Olsenella
OTU_10861	0	1	0	0	0	0	0	0	0	0	0	2	0	0	0	0	0	0	k__Bacteria; p__Bacteroidetes; c__Bacteroidia; o__Bacteroidales; f__Prevotellaceae
OTU_91	0	2	4	18	14	10	2	1	27	0	30	10	33	34	16	6	17	43	k__Bacteria; p__Firmicutes; c__Clostridia; o__Clostridiales; f__Christensenellaceae; g__Christensenellaceae R-7 group; s__uncultured bacterium
OTU_6795	0	2	0	0	0	0	0	0	0	0	0	0	0	0	0	0	0	0	k__Bacteria; p__Firmicutes; c__Clostridia; o__Clostridiales; f__Ruminococcaceae; g__Ruminococcaceae UCG-014
OTU_5015	0	1	0	0	0	0	0	1	0	2	0	0	0	0	0	0	0	0	k__Bacteria; p__Firmicutes; c__Clostridia; o__Clostridiales; f__Lachnospiraceae
OTU_1134	0	1	0	1	0	2	0	1	0	1	1	1	6	1	3	1	2	3	k__Bacteria; p__Firmicutes; c__Clostridia; o__Clostridiales; f__Lachnospiraceae; g__Shuttleworthia; s__uncultured bacterium
OTU_3581	0	0	0	0	1	0	0	0	0	0	0	0	0	0	0	1	0	0	k__Bacteria; p__Bacteroidetes; c__Bacteroidia; o__Bacteroidales
OTU_4611	0	1	0	0	0	0	0	0	0	0	0	0	0	0	0	1	0	0	k__Bacteria; p__Firmicutes; c__Clostridia; o__Clostridiales
OTU_7559	0	0	12	1	3	0	1	2	0	1	5	1	0	0	0	0	2	0	k__Bacteria; p__Cyanobacteria; c__Melainabacteria; o__Gastranaerophilales
OTU_1160	0	1	3	2	0	1	0	0	1	0	0	1	0	1	5	2	2	1	k__Bacteria; p__Firmicutes; c__Clostridia; o__Clostridiales; f__Lachnospiraceae; g__Dorea; s__uncultured bacterium
OTU_9415	0	1	0	0	1	0	1	2	1	0	0	1	0	0	0	0	0	0	k__Bacteria; p__Firmicutes; c__Clostridia; o__Clostridiales; f__Ruminococcaceae; g__Ruminococcaceae UCG-014
OTU_3258	0	1	0	0	0	0	0	0	0	0	0	0	0	0	0	0	0	0	k__Bacteria; p__Bacteroidetes; c__Bacteroidia; o__Bacteroidales; f__F082; g__uncultured rumen bacterium; s__uncultured rumen bacterium
OTU_3471	0	1	0	0	0	0	0	0	0	0	0	0	0	0	0	0	0	0	k__Bacteria; p__Bacteroidetes; c__Bacteroidia; o__Bacteroidales; f__Prevotellaceae
OTU_1701	0	0	1	0	1	0	0	0	0	1	0	2	0	1	0	0	0	2	k__Bacteria; p__Firmicutes; c__Clostridia; o__Clostridiales; f__Christensenellaceae; g__Christensenellaceae R-7 group; s__gut metagenome
OTU_7354	0	1	0	0	1	0	0	0	0	0	3	1	0	1	0	1	0	0	k__Bacteria; p__Bacteroidetes; c__Bacteroidia; o__Bacteroidales; f__Prevotellaceae; g__Prevotella 1; s__uncultured bacterium
OTU_4591	0	0	0	0	0	0	0	0	0	0	0	0	0	0	0	0	0	0	k__Bacteria; p__Firmicutes; c__Clostridia; o__Clostridiales; f__Ruminococcaceae
OTU_10547	0	1	0	0	2	0	0	0	0	0	0	0	0	2	1	2	0	0	k__Bacteria; p__Firmicutes; c__Clostridia; o__Clostridiales; f__Ruminococcaceae; g__Ruminococcaceae NK4A214 group
OTU_2880	0	1	2	0	0	0	1	0	0	0	0	0	0	0	0	0	0	0	k__Bacteria; p__Bacteroidetes; c__Bacteroidia; o__Bacteroidales; f__Muribaculaceae; g__uncultured bacterium; s__uncultured bacterium
OTU_10989	0	1	0	2	0	0	1	0	0	0	0	0	1	1	0	0	0	0	k__Bacteria; p__Bacteroidetes; c__Bacteroidia; o__Bacteroidales; f__Prevotellaceae; g__Prevotella 1
OTU_6497	0	1	0	0	0	1	1	1	0	0	0	0	0	2	0	1	0	0	k__Bacteria
OTU_3039	0	0	1	0	0	0	0	1	0	0	0	0	1	0	2	0	0	0	k__Bacteria; p__Firmicutes; c__Clostridia; o__Clostridiales; f__Lachnospiraceae
OTU_9686	0	1	0	0	0	0	0	0	0	0	0	0	0	0	0	0	0	0	k__Bacteria; p__Bacteroidetes; c__Bacteroidia; o__Bacteroidales; f__Prevotellaceae
OTU_2390	0	0	0	0	0	0	0	0	0	0	1	0	0	0	0	0	0	0	k__Bacteria; p__Firmicutes; c__Clostridia; o__Clostridiales; f__Lachnospiraceae
OTU_6456	0	1	0	0	0	0	0	0	0	0	0	0	0	0	0	0	0	0	k__Bacteria; p__Firmicutes; c__Clostridia; o__Clostridiales; f__Lachnospiraceae
OTU_10296	0	2	0	0	0	0	0	0	0	0	0	0	0	0	0	0	0	0	k__Bacteria; p__Firmicutes; c__Clostridia; o__Clostridiales; f__Ruminococcaceae
OTU_2420	0	3	2	0	0	0	0	0	0	0	0	0	0	0	0	0	0	0	k__Bacteria; p__Fusobacteria; c__Fusobacteriia; o__Fusobacteriales; f__Fusobacteriaceae; g__Fusobacterium
OTU_3548	0	1	0	0	0	0	0	0	0	0	0	0	0	0	0	0	0	1	k__Bacteria; p__Firmicutes; c__Clostridia; o__Clostridiales; f__Peptococcaceae; g__uncultured
OTU_3914	0	1	0	0	0	0	0	0	0	0	0	0	0	0	0	0	0	0	k__Bacteria; p__Firmicutes; c__Erysipelotrichia; o__Erysipelotrichales; f__Erysipelotrichaceae; g__[Anaerorhabdus] furcosa group; s__uncultured Erysipelotrichaceae bacterium
OTU_2281	0	1	1	1	0	1	1	0	0	0	0	0	0	0	1	0	0	0	k__Bacteria; p__Tenericutes; c__Mollicutes; o__Mollicutes RF39
OTU_10955	0	1	0	1	2	0	0	0	0	0	0	0	0	0	0	0	1	0	k__Bacteria; p__Bacteroidetes; c__Bacteroidia; o__Bacteroidales; f__Prevotellaceae; g__Prevotella 1; s__uncultured rumen bacterium
OTU_2730	0	1	0	0	0	0	0	0	0	0	1	0	0	0	0	0	0	0	k__Bacteria; p__Actinobacteria; c__Coriobacteriia; o__Coriobacteriales
OTU_1220	0	1	1	0	4	1	1	0	0	1	0	1	0	0	1	1	1	0	k__Bacteria; p__Bacteroidetes; c__Bacteroidia; o__Bacteroidales; f__Prevotellaceae
OTU_5611	0	1	0	0	0	0	2	1	0	0	0	0	0	0	0	0	0	0	k__Bacteria; p__Firmicutes; c__Clostridia; o__Clostridiales; f__Ruminococcaceae; g__Ruminococcaceae UCG-005
OTU_2435	0	1	3	0	0	0	0	0	0	0	0	0	0	1	2	0	1	0	k__Bacteria; p__Firmicutes; c__Clostridia; o__Clostridiales; f__Lachnospiraceae
OTU_1029	0	1	0	2	3	0	0	0	1	2	5	0	1	2	0	1	2	4	k__Bacteria; p__Firmicutes; c__Clostridia; o__Clostridiales; f__Lachnospiraceae; g__Acetitomaculum
OTU_1301	0	0	0	0	0	0	0	0	0	0	2	0	0	2	1	0	1	0	k__Bacteria; p__Firmicutes; c__Clostridia; o__Clostridiales; f__Christensenellaceae; g__Christensenellaceae R-7 group; s__uncultured rumen bacterium
OTU_9939	0	2	0	0	0	0	0	0	0	0	0	0	0	0	0	0	0	0	k__Bacteria
OTU_2006	0	0	0	0	0	0	0	1	0	0	0	0	1	0	1	0	0	0	k__Bacteria; p__Actinobacteria; c__Coriobacteriia; o__Coriobacteriales; f__Coriobacteriaceae; g__Collinsella; s__uncultured bacterium
OTU_190	0	1	0	1	0	1	0	0	0	1	0	0	0	0	0	0	0	0	k__Bacteria; p__Firmicutes; c__Clostridia; o__Clostridiales; f__Ruminococcaceae; g__Ruminococcaceae UCG-010
OTU_6547	0	1	3	2	0	0	0	2	3	0	0	0	0	0	0	1	0	2	k__Bacteria; p__Firmicutes; c__Clostridia; o__Clostridiales; f__Ruminococcaceae; g__Ruminococcaceae UCG-001
OTU_6306	0	1	0	1	0	0	0	2	0	1	1	1	1	4	0	0	0	0	k__Bacteria; p__Firmicutes; c__Clostridia; o__Clostridiales; f__Ruminococcaceae; g__Ruminococcus 1
OTU_7175	0	0	0	0	0	0	0	0	0	2	0	2	0	0	0	0	0	0	k__Bacteria; p__Bacteroidetes; c__Bacteroidia; o__Bacteroidales; f__Prevotellaceae
OTU_4734	0	1	0	0	0	0	0	0	0	0	0	0	1	0	0	0	0	0	k__Bacteria; p__Firmicutes; c__Clostridia; o__Clostridiales; f__Lachnospiraceae
OTU_8989	0	1	0	0	0	0	0	0	0	0	0	1	0	0	0	0	0	0	k__Bacteria; p__Firmicutes
OTU_8304	0	1	0	0	3	0	0	0	0	0	0	0	0	0	0	1	0	0	k__Bacteria; p__Firmicutes; c__Clostridia; o__Clostridiales; f__Lachnospiraceae
OTU_2578	0	3	0	0	0	0	0	0	1	0	2	0	0	0	0	0	0	0	k__Bacteria; p__Proteobacteria; c__Alphaproteobacteria; o__Rhizobiales; f__Rhizobiaceae; g__Allorhizobium-Neorhizobium-Pararhizobium-Rhizobium; s__uncultured bacterium
OTU_10156	0	1	1	0	0	0	0	1	0	0	2	0	0	2	1	1	0	2	k__Bacteria; p__Firmicutes; c__Clostridia; o__Clostridiales; f__Lachnospiraceae; g__[Eubacterium] hallii group; s__uncultured bacterium
OTU_1590	0	0	1	4	0	0	2	1	3	4	0	0	1	0	15	0	1	0	k__Bacteria; p__Bacteroidetes; c__Bacteroidia; o__Bacteroidales; f__Muribaculaceae; g__uncultured bacterium; s__uncultured bacterium
OTU_7543	0	1	1	0	0	0	1	0	0	0	0	0	0	0	0	0	0	0	k__Bacteria; p__Bacteroidetes; c__Bacteroidia; o__Bacteroidales; f__Prevotellaceae; g__Prevotella 7; s__uncultured bacterium
OTU_8744	0	0	0	1	0	2	0	0	0	1	0	0	0	2	0	0	0	0	k__Bacteria; p__Firmicutes; c__Clostridia; o__Clostridiales
OTU_2788	0	2	0	0	0	0	0	0	0	0	0	0	0	0	0	0	0	0	k__Bacteria; p__Bacteroidetes; c__Bacteroidia; o__Bacteroidales; f__Prevotellaceae
OTU_2543	0	0	1	0	3	3	1	1	0	0	1	1	1	0	0	0	0	0	k__Bacteria; p__Tenericutes; c__Mollicutes; o__Mollicutes RF39; f__uncultured bacterium; g__uncultured bacterium; s__uncultured bacterium
OTU_7854	0	1	0	0	0	0	0	0	0	2	0	0	0	0	0	0	0	0	k__Bacteria; p__Firmicutes; c__Clostridia; o__Clostridiales; f__Lachnospiraceae
OTU_2516	0	1	0	0	0	1	2	2	0	0	0	1	0	0	0	0	0	2	k__Bacteria; p__Firmicutes; c__Clostridia; o__Clostridiales; f__Ruminococcaceae
OTU_1016	0	1	0	3	1	0	0	0	7	2	1	0	0	0	0	1	4	0	k__Bacteria; p__Firmicutes; c__Clostridia; o__Clostridiales; f__Ruminococcaceae; g__Butyricicoccus; s__Butyricicoccus pullicaecorum 1.2
OTU_11085	0	0	1	0	0	2	0	0	0	0	0	0	0	0	0	0	0	0	k__Bacteria; p__Bacteroidetes; c__Bacteroidia; o__Bacteroidales; f__Prevotellaceae; g__Prevotella 1; s__uncultured bacterium
OTU_2037	0	1	0	0	0	0	0	0	0	0	0	0	0	0	3	0	1	0	k__Bacteria; p__Bacteroidetes; c__Bacteroidia; o__Bacteroidales; f__Muribaculaceae; g__uncultured bacterium; s__uncultured bacterium
OTU_8790	0	0	1	0	1	0	4	1	1	1	0	1	0	3	0	2	0	0	k__Bacteria; p__Bacteroidetes; c__Bacteroidia; o__Bacteroidales; f__Prevotellaceae; g__Prevotella 1; s__uncultured rumen bacterium
OTU_991	0	1	0	0	0	2	2	0	0	0	0	3	0	4	0	0	2	1	k__Bacteria; p__Bacteroidetes; c__Bacteroidia; o__Bacteroidales; f__Rikenellaceae; g__Alistipes; s__uncultured Alistipes sp.
OTU_3267	0	0	2	0	0	0	0	0	0	0	0	0	0	0	1	0	0	0	k__Bacteria; p__Firmicutes; c__Clostridia; o__Clostridiales; f__Lachnospiraceae; g__Agathobacter; s__uncultured rumen bacterium
OTU_3381	0	0	0	0	0	0	0	1	0	0	0	2	0	0	3	0	0	0	k__Bacteria; p__Firmicutes; c__Clostridia; o__Clostridiales; f__Lachnospiraceae
OTU_9266	0	1	0	0	0	0	0	0	0	0	0	0	0	0	0	0	0	0	k__Bacteria; p__Firmicutes; c__Clostridia; o__Clostridiales
OTU_6806	0	2	0	0	0	0	0	0	0	0	0	0	0	2	0	0	0	0	k__Bacteria; p__Actinobacteria; c__Actinobacteria; o__Micrococcales; f__Brevibacteriaceae; g__Brevibacterium
OTU_8294	0	1	0	0	0	0	0	0	0	0	1	0	0	0	0	0	0	0	k__Bacteria; p__Bacteroidetes; c__Bacteroidia; o__Bacteroidales; f__Prevotellaceae
OTU_2155	0	0	0	0	0	0	0	0	0	0	0	0	0	0	1	0	0	0	k__Bacteria; p__Actinobacteria; c__Coriobacteriia; o__Coriobacteriales; f__Eggerthellaceae
OTU_6805	0	0	0	0	0	0	0	0	1	0	0	0	0	0	0	0	0	0	k__Bacteria; p__Firmicutes; c__Clostridia; o__Clostridiales; f__Ruminococcaceae; g__[Eubacterium] coprostanoligenes group; s__uncultured bacterium
OTU_511	0	2	3	7	8	10	2	1	5	1	4	2	6	0	8	15	9	13	k__Bacteria; p__Bacteroidetes; c__Bacteroidia; o__Bacteroidales; f__Prevotellaceae; g__Prevotella 1
OTU_2333	0	1	0	0	0	1	0	0	0	0	0	0	0	0	3	0	0	0	k__Bacteria; p__Bacteroidetes; c__Bacteroidia; o__Bacteroidales; f__Prevotellaceae
OTU_1240	0	1	0	0	0	0	0	0	0	1	0	0	0	1	0	1	0	0	k__Bacteria; p__Firmicutes; c__Clostridia; o__Clostridiales; f__Ruminococcaceae; g__Ruminococcaceae UCG-010; s__uncultured bacterium
OTU_8669	0	1	2	1	4	2	1	0	2	3	1	0	1	3	0	0	0	1	k__Bacteria; p__Firmicutes; c__Clostridia; o__Clostridiales; f__Ruminococcaceae; g__[Eubacterium] coprostanoligenes group
OTU_1259	0	0	0	0	3	0	0	0	2	0	3	0	0	0	0	0	1	0	k__Bacteria; p__Proteobacteria; c__Alphaproteobacteria; o__Rickettsiales; f__Mitochondria; g__uncultured rumen bacterium; s__uncultured rumen bacterium
OTU_8694	0	1	1	0	0	0	0	0	0	0	2	0	1	0	0	0	0	0	k__Bacteria; p__Bacteroidetes; c__Bacteroidia; o__Bacteroidales; f__Rikenellaceae; g__Rikenellaceae RC9 gut group; s__uncultured rumen bacterium
OTU_2322	0	0	0	1	0	0	0	0	1	0	1	1	0	0	1	0	0	0	k__Bacteria
OTU_11130	0	0	0	0	1	0	4	0	0	0	0	1	0	1	0	1	2	0	k__Bacteria; p__Firmicutes; c__Clostridia; o__Clostridiales; f__Lachnospiraceae
OTU_927	0	1	0	0	0	0	0	0	0	0	0	0	0	0	0	0	0	0	k__Bacteria; p__Firmicutes; c__Clostridia; o__Clostridiales; f__Ruminococcaceae; g__[Eubacterium] coprostanoligenes group; s__uncultured rumen bacterium
OTU_1516	0	0	0	0	1	1	1	1	0	1	0	0	0	0	2	0	1	0	k__Bacteria; p__Bacteroidetes; c__Bacteroidia; o__Bacteroidales; f__Prevotellaceae; g__Prevotellaceae UCG-001; s__uncultured bacterium
OTU_2442	0	1	1	1	0	1	0	0	1	0	0	0	0	1	0	1	0	0	k__Bacteria; p__Bacteroidetes; c__Bacteroidia; o__Bacteroidales; f__Prevotellaceae; g__Prevotella 1; s__uncultured rumen bacterium
OTU_10222	0	1	0	0	0	0	0	0	0	0	0	0	0	0	0	0	0	0	k__Bacteria; p__Firmicutes; c__Clostridia; o__Clostridiales; f__Ruminococcaceae
OTU_11188	0	2	0	1	0	0	0	0	0	0	0	0	0	0	0	1	2	0	k__Bacteria; p__Firmicutes; c__Clostridia; o__Clostridiales; f__Lachnospiraceae
OTU_4496	0	0	0	0	0	0	0	0	0	2	1	0	0	0	0	0	0	0	k__Bacteria; p__Firmicutes; c__Clostridia; o__Clostridiales
OTU_10868	0	1	0	0	0	0	0	0	0	0	0	1	1	0	0	0	0	0	k__Bacteria; p__Firmicutes; c__Clostridia; o__Clostridiales; f__Ruminococcaceae
OTU_7933	0	1	0	0	0	1	1	0	2	2	0	0	1	2	0	1	0	0	k__Bacteria; p__Bacteroidetes; c__Bacteroidia; o__Bacteroidales; f__Prevotellaceae
OTU_7305	0	1	0	0	0	0	0	0	0	0	0	0	0	0	0	0	1	0	k__Bacteria; p__Bacteroidetes; c__Bacteroidia; o__Bacteroidales; f__Prevotellaceae
OTU_1971	0	1	1	1	0	1	2	0	0	0	0	0	0	0	0	1	2	2	k__Bacteria; p__Bacteroidetes; c__Bacteroidia; o__Bacteroidales; f__Muribaculaceae; g__uncultured bacterium; s__uncultured bacterium
OTU_9217	0	1	0	0	0	0	2	0	5	0	1	0	0	9	1	5	2	15	k__Bacteria; p__Firmicutes; c__Clostridia; o__Clostridiales; f__Lachnospiraceae
OTU_8866	0	1	0	1	0	0	2	0	0	0	0	0	1	0	1	0	1	0	k__Bacteria; p__Firmicutes; c__Clostridia; o__Clostridiales; f__Ruminococcaceae; g__Ruminococcaceae UCG-014
OTU_1069	0	1	7	2	0	3	0	0	0	0	5	2	5	2	0	1	1	0	k__Bacteria; p__Bacteroidetes; c__Bacteroidia; o__Bacteroidales; f__Prevotellaceae; g__Prevotellaceae UCG-001; s__uncultured rumen bacterium
OTU_1416	0	0	13	0	0	0	0	0	0	0	0	0	0	0	0	0	0	0	k__Bacteria; p__Tenericutes; c__Mollicutes; o__Mollicutes RF39; f__uncultured bacterium; g__uncultured bacterium; s__uncultured bacterium
OTU_277	0	1	17	38	34	18	23	21	3	2	9	5	7	11	22	13	28	46	k__Bacteria; p__Firmicutes; c__Clostridia; o__Clostridiales; f__Defluviitaleaceae; g__Defluviitaleaceae UCG-011; s__uncultured rumen bacterium
OTU_2455	0	1	4	0	9	2	1	1	1	0	9	0	5	28	3	8	9	17	k__Bacteria; p__Firmicutes; c__Clostridia; o__Clostridiales; f__Ruminococcaceae; g__Ruminococcaceae NK4A214 group
OTU_9989	0	0	0	0	0	0	0	0	0	0	0	0	0	0	0	0	0	1	k__Bacteria; p__Firmicutes; c__Clostridia; o__Clostridiales
OTU_8881	0	1	0	0	0	0	0	0	0	0	0	0	0	0	0	0	0	0	k__Bacteria; p__Patescibacteria; c__Microgenomatia; o__Candidatus Pacebacteria
OTU_9595	0	0	0	0	0	0	0	0	0	0	0	1	0	0	0	0	0	0	k__Bacteria; p__Firmicutes; c__Clostridia; o__Clostridiales; f__Ruminococcaceae; g__Ruminococcaceae UCG-014
OTU_9726	0	0	1	0	0	0	0	0	0	0	0	0	0	0	0	0	0	0	k__Bacteria; p__Firmicutes; c__Clostridia; o__Clostridiales; f__Christensenellaceae; g__Christensenellaceae R-7 group
OTU_11025	0	2	0	0	0	0	0	0	0	2	0	0	0	0	0	0	0	0	k__Bacteria; p__Firmicutes; c__Clostridia; o__Clostridiales; f__Lachnospiraceae
OTU_3149	0	1	16	2	3	2	0	1	5	0	8	3	2	3	2	1	5	10	k__Bacteria; p__Firmicutes; c__Clostridia; o__Clostridiales; f__Christensenellaceae; g__Christensenellaceae R-7 group; s__uncultured rumen bacterium
OTU_6802	0	0	0	0	0	0	0	1	0	0	0	0	0	0	0	0	0	0	k__Bacteria; p__Firmicutes; c__Clostridia; o__Clostridiales; f__Lachnospiraceae
OTU_10184	0	1	0	0	0	0	1	2	0	3	0	1	1	3	1	1	0	0	k__Bacteria; p__Firmicutes; c__Clostridia; o__Clostridiales; f__Ruminococcaceae; g__Ruminococcaceae UCG-014
OTU_7567	0	2	0	0	0	0	0	0	0	0	0	0	0	0	0	0	0	0	k__Bacteria; p__Firmicutes; c__Clostridia; o__Clostridiales; f__Ruminococcaceae
OTU_11029	0	2	0	0	0	0	0	0	0	0	0	0	0	0	0	0	0	0	k__Bacteria; p__Firmicutes; c__Clostridia; o__Clostridiales
OTU_5640	0	1	0	1	2	0	1	1	1	0	1	1	0	1	0	0	1	4	k__Bacteria; p__Bacteroidetes; c__Bacteroidia; o__Bacteroidales; f__F082; g__uncultured rumen bacterium; s__uncultured rumen bacterium
OTU_1504	0	0	3	0	0	2	0	1	0	0	3	0	0	0	1	0	0	0	k__Bacteria; p__Bacteroidetes; c__Bacteroidia; o__Bacteroidales; f__Prevotellaceae; g__Prevotellaceae UCG-001; s__uncultured Prevotellaceae bacterium
OTU_8510	0	1	0	0	0	0	1	1	1	0	0	0	0	0	0	0	1	0	k__Bacteria; p__Bacteroidetes; c__Bacteroidia; o__Bacteroidales; f__Prevotellaceae; g__Prevotella 1; s__uncultured bacterium
OTU_6626	0	1	0	0	0	0	1	0	0	0	0	0	0	0	0	0	0	0	k__Bacteria; p__Bacteroidetes; c__Bacteroidia; o__Bacteroidales
OTU_1671	0	0	3	2	1	1	0	1	0	0	1	0	1	0	0	0	0	0	k__Bacteria; p__Tenericutes; c__Mollicutes; o__Mollicutes RF39; f__uncultured bacterium; g__uncultured bacterium; s__uncultured bacterium
OTU_3665	0	1	0	0	0	0	0	1	1	0	0	0	1	1	0	0	2	2	k__Bacteria; p__Firmicutes; c__Clostridia; o__Clostridiales; f__Ruminococcaceae; g__Ruminococcaceae NK4A214 group
OTU_9507	0	0	0	0	0	0	0	1	0	0	2	1	1	1	0	0	1	0	k__Bacteria; p__Firmicutes; c__Clostridia; o__Clostridiales; f__Ruminococcaceae
OTU_3015	0	1	0	0	1	0	1	0	0	0	1	0	0	0	1	0	0	1	k__Bacteria; p__Firmicutes; c__Clostridia; o__Clostridiales; f__Lachnospiraceae
OTU_7784	0	0	0	0	0	0	1	0	0	0	0	1	0	0	1	0	0	0	k__Bacteria
OTU_3062	0	1	0	0	0	0	0	0	0	0	0	0	0	0	0	0	2	1	k__Bacteria; p__Firmicutes; c__Clostridia; o__Clostridiales; f__Ruminococcaceae
OTU_9618	0	1	1	1	0	0	1	0	2	0	1	0	2	2	0	1	2	2	k__Bacteria; p__Firmicutes; c__Clostridia; o__Clostridiales; f__Ruminococcaceae; g__[Eubacterium] coprostanoligenes group; s__uncultured bacterium
OTU_9160	0	1	0	0	5	0	0	0	0	0	1	0	0	1	0	0	2	7	k__Bacteria; p__Firmicutes; c__Clostridia; o__Clostridiales; f__Ruminococcaceae; g__Ruminococcaceae NK4A214 group
OTU_761	0	2	0	0	0	0	0	0	0	1	0	0	1	0	2	0	0	0	k__Bacteria; p__Firmicutes; c__Clostridia; o__Clostridiales; f__Lachnospiraceae
OTU_9887	0	0	0	0	1	0	0	0	0	0	1	0	0	0	0	0	0	0	k__Bacteria; p__Bacteroidetes; c__Bacteroidia; o__Bacteroidales; f__Prevotellaceae; g__Prevotella 1
OTU_8870	0	1	0	0	0	0	0	0	0	0	0	0	0	0	0	0	0	0	k__Bacteria; p__Bacteroidetes; c__Bacteroidia; o__Bacteroidales; f__Prevotellaceae
OTU_1854	0	0	0	0	0	0	0	0	0	0	0	0	0	0	0	0	0	1	k__Bacteria; p__Proteobacteria; c__Deltaproteobacteria; o__Bradymonadales; f__uncultured rumen bacterium; g__uncultured rumen bacterium; s__uncultured rumen bacterium
OTU_4055	0	1	4	3	1	2	0	2	1	0	4	0	2	2	0	0	1	8	k__Bacteria; p__Firmicutes; c__Clostridia; o__Clostridiales; f__Ruminococcaceae; g__Ruminococcus 2
OTU_4701	0	0	6	0	1	0	3	7	2	6	2	2	0	0	0	0	1	0	k__Bacteria; p__Bacteroidetes; c__Bacteroidia; o__Bacteroidales; f__Prevotellaceae; g__Prevotella 9; s__uncultured rumen bacterium
OTU_8271	0	2	0	0	1	0	0	0	0	0	0	0	0	0	1	0	3	4	k__Bacteria; p__Firmicutes; c__Clostridia; o__Clostridiales; f__Ruminococcaceae; g__Ruminococcus 2; s__uncultured bacterium
OTU_3488	0	0	0	0	0	0	3	0	0	1	0	1	0	0	0	0	0	0	k__Bacteria; p__Firmicutes; c__Clostridia; o__Clostridiales; f__Lachnospiraceae
OTU_7299	0	0	0	0	0	1	0	0	0	0	0	0	0	0	0	0	0	0	k__Bacteria; p__Bacteroidetes; c__Bacteroidia; o__Bacteroidales; f__Rikenellaceae; g__Rikenellaceae RC9 gut group
OTU_1786	0	0	0	3	7	1	0	0	0	0	1	0	1	0	1	0	7	16	k__Bacteria; p__Bacteroidetes; c__Bacteroidia; o__Bacteroidales; f__F082
OTU_4105	0	1	0	2	0	1	0	0	0	0	1	2	0	0	1	0	0	0	k__Bacteria; p__Tenericutes; c__Mollicutes; o__Mollicutes RF39; f__uncultured bacterium; g__uncultured bacterium; s__uncultured bacterium
OTU_10513	0	0	0	0	0	1	0	1	0	1	0	0	0	0	1	0	0	0	k__Bacteria; p__Bacteroidetes; c__Bacteroidia; o__Bacteroidales; f__Prevotellaceae; g__Prevotella 1
OTU_9724	0	2	2	0	0	0	0	0	0	0	0	0	0	1	1	0	0	0	k__Bacteria; p__Bacteroidetes; c__Bacteroidia; o__Bacteroidales; f__Prevotellaceae
OTU_6701	0	1	1	1	2	0	0	0	2	0	2	0	1	4	2	2	0	0	k__Bacteria; p__Firmicutes; c__Clostridia; o__Clostridiales; f__Ruminococcaceae; g__Ruminococcaceae NK4A214 group
OTU_1113	0	1	7	0	0	4	0	5	0	0	7	1	2	1	2	0	0	1	k__Bacteria; p__Firmicutes; c__Clostridia; o__Clostridiales; f__Lachnospiraceae; g__Lachnospiraceae NK4A136 group
OTU_6803	0	2	2	0	0	0	0	0	0	0	1	0	0	1	0	1	0	0	k__Bacteria; p__Bacteroidetes; c__Bacteroidia; o__Bacteroidales; f__Prevotellaceae; g__Prevotella 1; s__uncultured rumen bacterium
OTU_1570	0	0	2	2	0	0	0	0	0	0	1	0	0	0	1	0	0	0	k__Bacteria; p__Firmicutes; c__Clostridia; o__Clostridiales; f__Ruminococcaceae; g__Ruminococcus 1
OTU_163	0	0	107	11	87	13	31	29	1	2	47	2	3	37	69	71	22	20	k__Bacteria; p__Firmicutes; c__Clostridia; o__Clostridiales; f__Ruminococcaceae; g__Ruminococcaceae UCG-002
OTU_1125	0	0	4	1	11	5	1	0	0	0	4	1	2	4	4	1	5	0	k__Bacteria; p__Bacteroidetes; c__Bacteroidia; o__Bacteroidales; f__Prevotellaceae
OTU_1758	0	0	7	1	3	0	0	0	3	0	0	0	1	0	0	1	2	0	k__Bacteria; p__Bacteroidetes; c__Bacteroidia; o__Bacteroidales; f__Prevotellaceae; g__Prevotellaceae NK3B31 group; s__uncultured rumen bacterium
OTU_1369	0	0	1	2	2	1	1	0	0	0	2	1	0	0	4	4	2	1	k__Bacteria; p__Bacteroidetes; c__Bacteroidia; o__Bacteroidales; f__Muribaculaceae
OTU_964	0	0	5	1	1	0	4	1	1	3	2	2	0	3	3	9	1	4	k__Bacteria; p__Bacteroidetes; c__Bacteroidia; o__Bacteroidales; f__Prevotellaceae; g__Prevotella 1
OTU_2075	0	0	2	1	0	0	0	0	0	0	0	0	0	0	0	0	1	1	k__Bacteria; p__Firmicutes; c__Clostridia; o__Clostridiales; f__Ruminococcaceae
OTU_7755	0	0	0	0	0	0	0	0	0	0	0	0	0	0	0	1	0	1	k__Bacteria; p__Firmicutes; c__Clostridia; o__Clostridiales; f__Lachnospiraceae
OTU_642	0	0	5	3	9	4	5	2	1	1	4	1	4	15	10	10	5	10	k__Bacteria; p__Bacteroidetes; c__Bacteroidia; o__Bacteroidales; f__Rikenellaceae; g__Rikenellaceae RC9 gut group
OTU_207	0	0	9	30	129	14	0	10	1	0	19	1	5	1	20	11	54	146	k__Bacteria; p__Bacteroidetes; c__Bacteroidia; o__Bacteroidales; f__F082; g__uncultured bacterium; s__uncultured bacterium
OTU_1735	0	0	5	4	2	0	0	0	0	1	0	0	1	0	1	0	1	9	k__Bacteria; p__Bacteroidetes; c__Bacteroidia
OTU_704	0	0	28	2	25	6	2	2	1	0	0	0	0	0	17	10	11	10	k__Bacteria; p__Bacteroidetes; c__Bacteroidia; o__Bacteroidales; f__Prevotellaceae; g__Prevotellaceae UCG-003
OTU_1422	0	0	9	1	5	0	0	0	0	0	0	0	2	0	1	0	0	3	k__Bacteria; p__Firmicutes; c__Clostridia; o__Clostridiales; f__Lachnospiraceae
OTU_101	0	0	59	0	186	1	25	33	0	0	0	0	0	6	60	11	46	4	k__Bacteria; p__Firmicutes; c__Clostridia; o__Clostridiales; f__Ruminococcaceae; g__Ruminococcaceae NK4A214 group; s__uncultured bacterium
OTU_2521	0	0	3	2	6	1	3	3	2	0	4	2	10	20	4	7	8	11	k__Bacteria; p__Firmicutes; c__Clostridia; o__Clostridiales; f__Ruminococcaceae; g__Ruminococcaceae NK4A214 group; s__uncultured rumen bacterium
OTU_267	0	0	4	0	13	2	1	0	0	3	2	0	0	1	13	5	2	0	k__Bacteria; p__Firmicutes; c__Clostridia; o__Clostridiales; f__Ruminococcaceae; g__[Eubacterium] coprostanoligenes group
OTU_3302	0	0	1	0	3	1	0	0	0	0	0	1	0	0	3	0	0	0	k__Bacteria; p__Bacteroidetes; c__Bacteroidia; o__Bacteroidales; f__Prevotellaceae; g__Prevotella 1; s__uncultured rumen bacterium
OTU_760	0	0	8	5	13	3	2	2	2	3	7	1	3	0	5	4	7	6	k__Bacteria; p__Bacteroidetes; c__Bacteroidia; o__Bacteroidales; f__Prevotellaceae; g__Prevotellaceae UCG-003
OTU_7820	0	0	1	0	0	0	0	0	0	1	0	0	0	0	0	0	0	0	k__Bacteria; p__Bacteroidetes; c__Bacteroidia; o__Bacteroidales; f__Prevotellaceae
OTU_1474	0	0	7	0	4	1	1	1	0	0	0	1	0	3	1	3	2	2	k__Bacteria; p__Firmicutes; c__Clostridia; o__Clostridiales; f__Ruminococcaceae; g__Saccharofermentans; s__uncultured bacterium
OTU_3762	0	0	0	0	0	0	2	0	0	1	0	0	0	0	0	0	0	0	k__Bacteria; p__Firmicutes; c__Clostridia; o__Clostridiales; f__Lachnospiraceae; g__Tyzzerella 3
OTU_588	0	0	3	0	16	10	5	2	3	0	16	0	3	8	7	4	5	0	k__Bacteria; p__Bacteroidetes; c__Bacteroidia; o__Bacteroidales; f__Prevotellaceae; g__Prevotella 1
OTU_9959	0	0	2	0	0	4	1	0	0	0	3	1	0	2	2	0	0	1	k__Bacteria; p__Bacteroidetes; c__Bacteroidia; o__Bacteroidales; f__Bacteroidales RF16 group; g__uncultured bacterium; s__uncultured bacterium
OTU_985	0	0	12	4	16	4	0	1	1	0	0	0	0	2	7	5	7	16	k__Bacteria; p__Bacteroidetes; c__Bacteroidia; o__Bacteroidales; f__Rikenellaceae; g__Rikenellaceae RC9 gut group; s__uncultured rumen bacterium
OTU_7978	0	0	1	0	0	0	0	0	0	0	0	0	0	0	0	0	0	0	k__Bacteria; p__Firmicutes; c__Clostridia; o__Clostridiales; f__Ruminococcaceae
OTU_506	0	0	7	4	17	4	0	0	1	1	1	0	2	6	7	14	6	16	k__Bacteria; p__Bacteroidetes; c__Bacteroidia; o__Bacteroidales; f__Bacteroidales RF16 group
OTU_1912	0	0	0	0	0	0	0	0	0	0	0	0	0	0	0	0	5	0	k__Bacteria; p__Firmicutes; c__Negativicutes; o__Selenomonadales; f__Veillonellaceae; g__Dialister; s__uncultured bacterium
OTU_2622	0	0	10	2	13	3	5	2	1	6	9	4	7	30	6	18	14	23	k__Bacteria; p__Firmicutes; c__Clostridia; o__Clostridiales; f__Ruminococcaceae; g__Ruminococcaceae NK4A214 group
OTU_4680	0	0	0	0	1	1	0	0	0	1	1	0	1	3	0	2	3	0	k__Bacteria; p__Firmicutes; c__Clostridia; o__Clostridiales
OTU_9729	0	0	1	0	0	0	0	0	0	0	0	0	0	0	0	0	0	0	k__Bacteria; p__Bacteroidetes; c__Bacteroidia; o__Bacteroidales; f__Prevotellaceae
OTU_1068	0	0	6	3	3	4	1	2	0	2	0	0	4	0	2	6	6	6	k__Bacteria; p__Firmicutes; c__Clostridia; o__Clostridiales; f__Lachnospiraceae; g__Lachnospiraceae NK3A20 group
OTU_7563	0	0	2	0	0	0	1	0	1	0	0	0	0	1	2	0	1	0	k__Bacteria; p__Bacteroidetes; c__Bacteroidia; o__Bacteroidales; f__Prevotellaceae; g__Prevotella 1; s__uncultured rumen bacterium
OTU_1058	0	0	7	6	10	3	1	3	2	0	1	0	1	4	1	2	3	1	k__Bacteria; p__Firmicutes; c__Clostridia; o__Clostridiales; f__Lachnospiraceae; g__Lachnospiraceae NK3A20 group; s__uncultured rumen bacterium
OTU_3576	0	0	1	0	0	0	0	0	0	0	1	0	0	2	0	0	1	3	k__Bacteria; p__Firmicutes; c__Clostridia; o__Clostridiales; f__Lachnospiraceae; g__Moryella; s__uncultured rumen bacterium
OTU_2528	0	0	1	0	1	0	0	0	1	0	0	0	0	0	0	0	0	3	k__Bacteria; p__Firmicutes; c__Clostridia; o__Clostridiales; f__Ruminococcaceae; g__Ruminococcaceae UCG-014; s__unidentified rumen bacterium RFN28
OTU_10071	0	0	1	0	0	0	1	0	0	0	0	0	0	0	0	0	0	0	k__Bacteria; p__Bacteroidetes; c__Bacteroidia; o__Bacteroidales; f__Prevotellaceae; g__Prevotella 1; s__uncultured rumen bacterium
OTU_790	0	0	27	18	7	3	0	0	0	0	0	0	0	0	0	3	6	36	k__Bacteria; p__Firmicutes; c__Clostridia; o__Clostridiales; f__Lachnospiraceae
OTU_10808	0	0	1	0	0	0	0	0	0	0	0	0	2	0	0	0	1	0	k__Bacteria; p__Firmicutes; c__Clostridia; o__Clostridiales; f__Ruminococcaceae
OTU_9756	0	0	1	0	0	0	0	0	0	1	0	0	1	1	0	0	0	0	k__Bacteria; p__Firmicutes; c__Clostridia; o__Clostridiales; f__Lachnospiraceae; g__[Eubacterium] ruminantium group; s__Eubacterium ruminantium
OTU_2168	0	0	2	0	1	0	0	3	0	0	0	0	0	0	0	0	0	0	k__Bacteria; p__Actinobacteria; c__Coriobacteriia; o__Coriobacteriales; f__Eggerthellaceae; g__DNF00809; s__uncultured bacterium
OTU_1007	0	0	2	2	3	3	0	0	0	1	3	3	2	0	2	2	3	1	k__Bacteria; p__Firmicutes; c__Clostridia; o__Clostridiales; f__Lachnospiraceae
[truncated: 8,499 more rows]
